# Supplementary material
Source: PubMed Central journal article supplement (PMC3326577)
Supplement: NIHMS234681-supplement-1.pdf [file NIHMS234681-supplement-1.pdf]

## **Supplementary Materials**

### ***Integrative genomic analysis of HIV-specific CD8<sup>+</sup> T cells reveals that PD-1 inhibits T cell function by upregulating BATF***

Michael Quigley, Florencia Pereyra, Björn Nilsson, Filippos Porichis, Catia Fonseca, Quentin Eichbaum, Boris Julg, Jonathan L. Jesneck, Kathleen Brosnahan, Sabrina Imam, Kate Russell, Ildiko Toth, Alicja Piechocka-Trocha, Douglas Dolfi, Jill Angelosanto, Alison Crawford, Haina Shin, Douglas S. Kwon, Jennifer Zupkosky, Loise Francisco, Gordon J. Freeman, E. John Wherry, Daniel E. Kaufmann, Bruce D. Walker, Benjamin Ebert and W. Nicholas Haining.

## **Contents**

Supplementary Figures 1 – 7

Supplementary Tables 1 – 6

Supplementary Methods

## Supplementary Figures

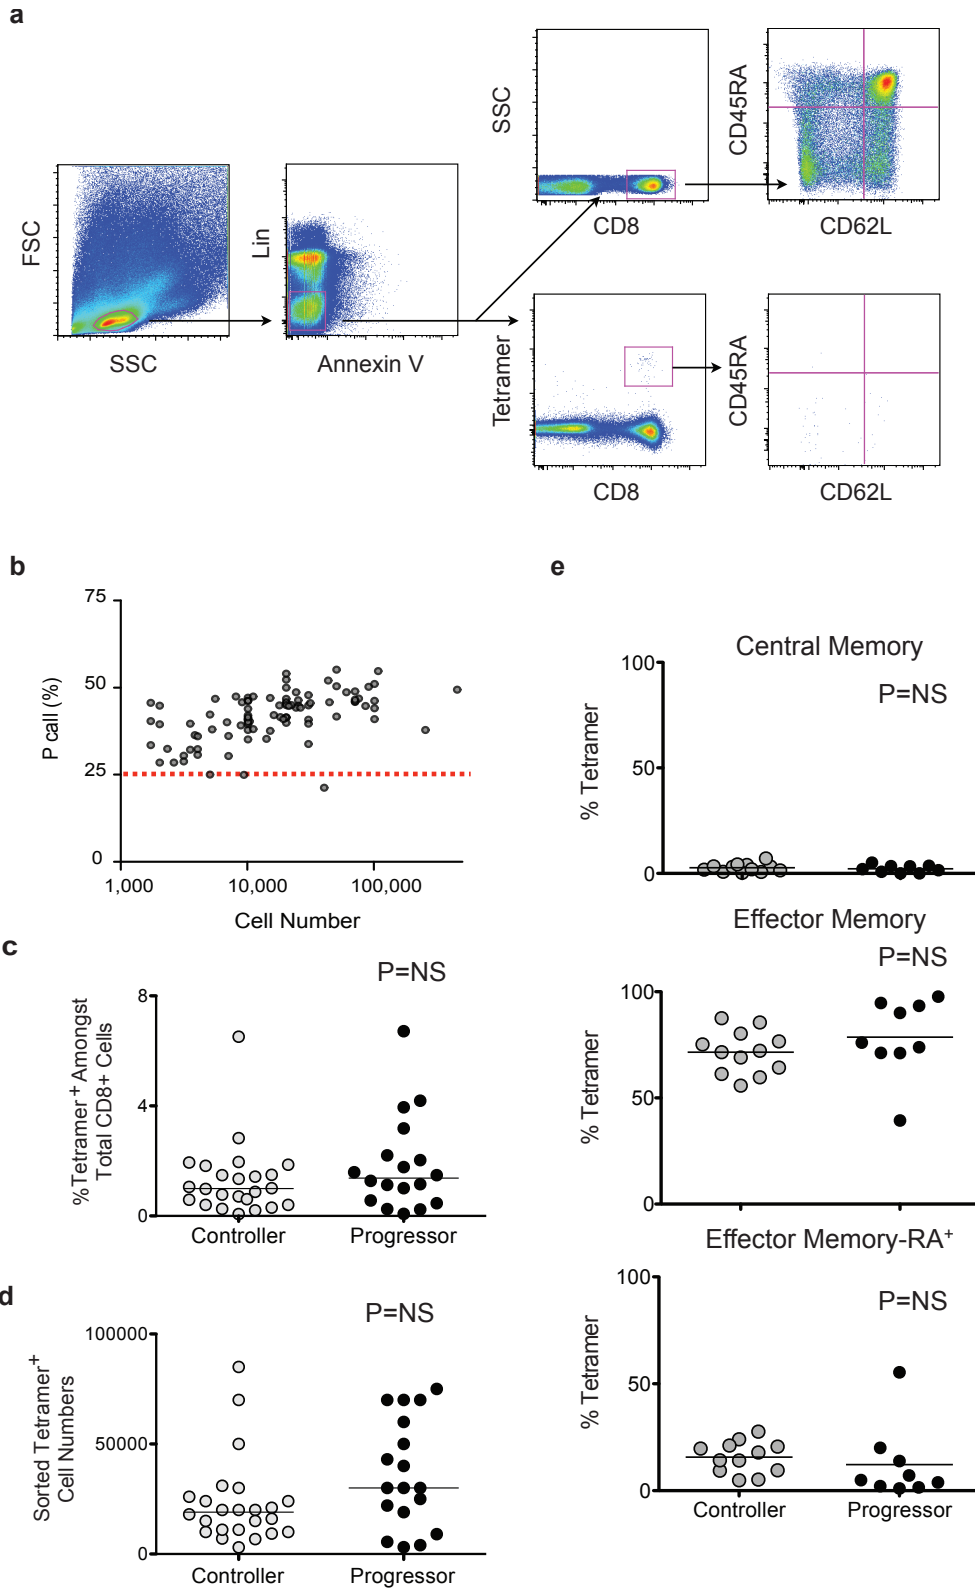

**Supplementary Figure 1: Sorting and characterization of HIV-specific CD8+ T cells**

(a) Flow cytometry gating strategy for sorting of HIV Gag-tetramer+ CD8+ T cells). (b) Quality of microarray data generated from small numbers of HIV Gag-specific CD8+ T cells as determined by percent P call. (c,d) Percent of tetramer+ cells in total CD8+ T cells (d) and numbers of cells recovered post-sort in controllers (grey circles) and progressors (black circles) cohorts. (e) Fraction of HIV Gag-specific CD8+ T cells with a central memory (upper plot), effector memory (middle plot) or effector memory-RA+ (lower plot) phenotype in controllers (grey circles) and progressors (black circles).

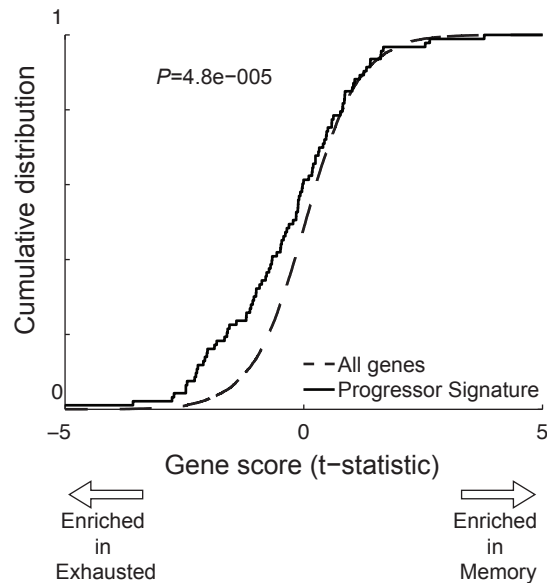

**Supplementary Figure 2: Transcriptional profiles of HIV-specific CD8+ T cells from progressors are globally similar to profiles from exhausted CD8+ T cells in the mouse model of chronic LCMV infection.**

The top 200 genes in the HIV progressor Gag-specific signature were tested for enrichment in the rank-ordered list of genes differentially expressed in exhausted LCMV-specific vs. functional memory LCMV-specific T cells. X-axis indicates the t-statistic measured for each of the ~11,000 genes mouse genes featured on the array, ranked in order of their differential expression in LCMV-specific CD8+ T cells from clone 13 infection (exhausted) vs. Armstrong (memory). Y-axis indicates the cumulative distribution of all genes (dotted lines) or of the set of 200 HIV-progressor genes (black line). Gene sets that are related to the class distinction on the X-axis would be expected to deviate from the dotted line (i.e. shifted towards the left if enriched in exhausted or shifted towards the right if enriched in memory LCMV-specific CD8+ T cells). A similar analysis using the controller signature show no enriched in CD8+ T cells from mouse model of LCMV Armstrong infection (not shown).

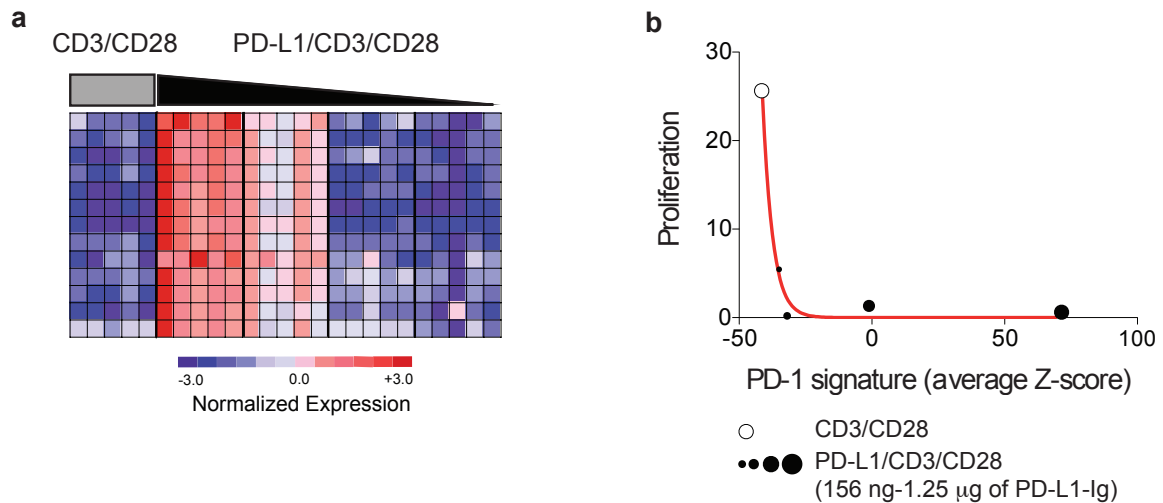

**Supplementary Figure 3: PD-1 signature genes are upregulated by PDL1 in primary human T cells.**

(a) Dose-dependent induction of the PD-1 signature genes in primary human CD4<sup>+</sup> T cells cultured either with CD3/CD28 beads (grey columns) or PDL1/CD3/CD28 beads with a 2-fold decreasing amounts of bead-bound PD-L1-Ig in replicates of five (black columns). (b) Correlation between inhibition of proliferation and upregulated of PD-1 signature genes presented in c. PD-1 signature gene expression summarized by average Z score (x-axis) and extent of proliferation by primary T cells over a four day period of stimulation with the relevant beads (y-axis,  $R^2 = 0.98$ ).

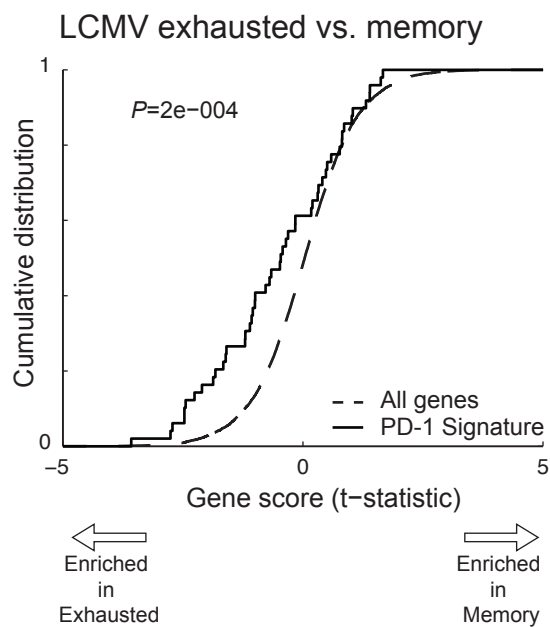

**Supplementary Figure 4: PD-1 signature genes are enriched in exhausted CD8+ T cells in the mouse model of chronic LCMV infection.**

The top 200 PD-1 signature genes were tested for enrichment in the exhausted vs memory CD8+ T cell profiles from the mouse model of LCMV infection. The enrichment is displayed as a cumulative enrichment plot, with the left-shift of the PD-1 signature (solid black line) indicating enrichment in exhausted T cells.

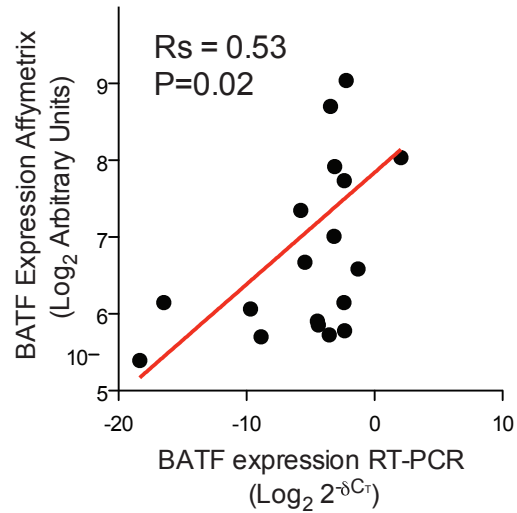

**Supplementary Figure 5: Validation of BATF expression in HIV-specific CD8+ T cells.**

Correlation between BATF expression as quantified by Affymetrix microarray and by quantitative RT-PCR in sorted populations of HIV-specific CD8+ T cells. RNA extracted from each sample underwent a separate linear amplification reaction prior each type of assay. Each point represents an individual patient sample (n=18) from which sufficient RNA was available for both assays. Rs and P value refer to the Spearman correlation coefficient.

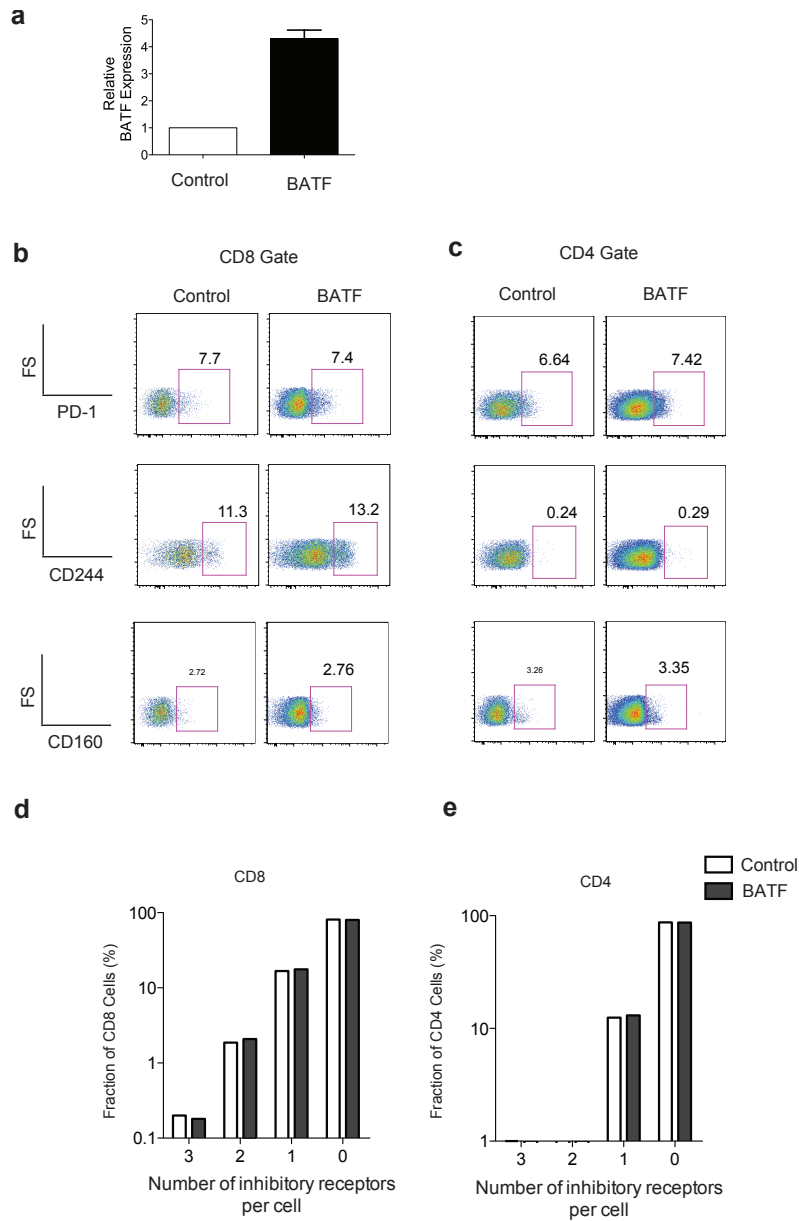

**Supplementary Figure 6: Inhibitory receptor expression in human T cells over-expressing BATF.**

(a) Relative BATF expression by quantitative PCR analysis in primary human T cells transduced with empty vector (white bar) or overexpressing BATF (black bar). (b,c) Multiparameter flow cytometry analysis of human CD8+ (b) and CD4+ T cells (c) for the inhibitory receptors shown two days post transduction with vector or BATF expressing lentivirus. Figures refer to percent of cells expressing the receptor indicated. (d,e) Analysis of the frequency of CD8+ (d) or CD4+ (e) T cells expressing the number of inhibitory receptors shown.



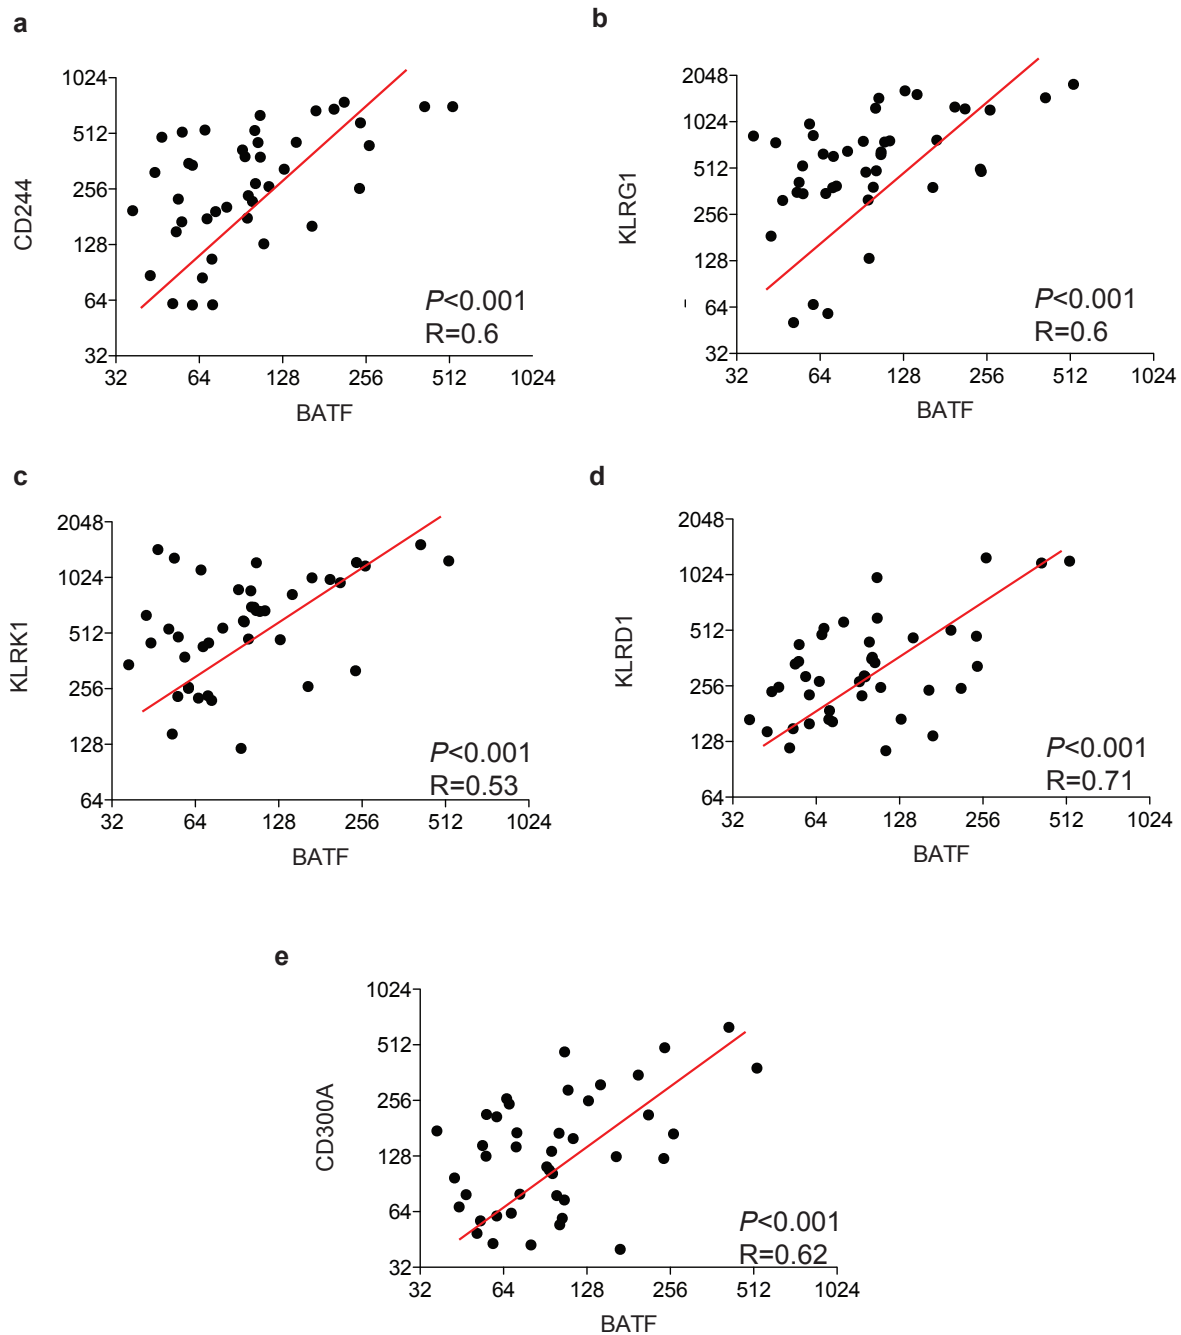

**Supplementary Figure 7: BATF expression is correlated with known or putative inhibitory receptors.**

A nearest gene neighbor analysis was performed to identify genes whose expression level correlated significantly by Pearson correlation analysis with that of BATF across all samples of HIV-specific CD8+ T cells. Of the top 500 genes, significant correlation was observed for genes with known or putative inhibitory function including CD244 (a); KLRG1 (b); KLRK1 (c); KLRD1 (d) and CD300A (e). Values refer to Affymetrix expression units and are presented in a log<sub>2</sub> plot to improve visualization of data.

## Supplementary Tables

**Supplementary Table 1:** Patient characteristics and distribution of class I HLA alleles associated with disease progression

|                                                              | <b>HIV Controllers</b>                | <b>Chronic Progressors</b> |
|--------------------------------------------------------------|---------------------------------------|----------------------------|
| <b>Number of subjects</b>                                    | 24                                    | 18                         |
| <b>Gender</b> Male (%)                                       | 22 (92)                               | 15 (83)                    |
| Female (%)                                                   | 2 (8)                                 | 3 (17)                     |
| <b>Race (%)</b> White                                        | 19 (79)                               | 10 (56)                    |
| Black                                                        | 3 (13)                                | 1 (6)                      |
| Other / Unknown                                              | 2 (8)                                 | 7 (38)                     |
| <b>Plasma HIV RNA, copies/ml</b><br>median (IQR)             | Below detection (49-100) <sup>A</sup> | 11,784 (5,035-29,915)      |
| <b>CD4+ cell count, cells/mm<sup>3</sup></b><br>median (IQR) | 792 (666-945) <sup>A</sup>            | 468 (358-582)              |
| <b>Duration of HIV diagnosis, years</b> median (IQR)         | 14 (7-20)                             | 4 (2-10)                   |
| <b>HLA B*57 (%)</b>                                          | 8 (33)                                | 6 (33)                     |
| <b>HLA B*27 (%)</b>                                          | 7 (29)                                | 0 (0)                      |
| <b>All protective HLA alleles<sup>B</sup></b>                | 20 (83)                               | 8 (44)                     |

<sup>A</sup>HIV controllers compared to chronic progressors \*  $P < 0.0001$  (*non-parametric Mann Whitney test*)

<sup>B</sup>Includes HLA B\*57, 27, 13, 14, 1503, 51 and 5801

Supplementary Table 2: HIV-specific CD8 T cells Progressors vs. Controllers

| probeset_id | GeneTitle                                                                                                       | GeneSymbol         | GeneID       | t        | q        |
|-------------|-----------------------------------------------------------------------------------------------------------------|--------------------|--------------|----------|----------|
| 210621_s_at | RAS p21 protein activator (GTPase activating protein) 1                                                         | RASA1              | 5921         | 6.102845 | 0.007526 |
| 202524_s_at | sparc/osteonectin, cwcv and kazal-like domains proteoglycan (testican) 2                                        | SPOCK2             | 9806         | 4.358444 | 0.358674 |
| 202677_at   | RAS p21 protein activator (GTPase activating protein) 1                                                         | RASA1              | 5921         | 4.019843 | 0.421399 |
| 205288_at   | CDC14 cell division cycle 14 homolog A (S. cerevisiae)                                                          | CDC14A             | 8556         | 3.954898 | 0.421399 |
| 216668_at   | ---                                                                                                             | ---                | ---          | 3.938437 | 0.421399 |
| 216042_at   | tumor necrosis factor receptor superfamily, member 25                                                           | TNFRSF25           | 8718         | 3.893672 | 0.421399 |
| 204897_at   | prostaglandin E receptor 4 (subtype EP4)                                                                        | PTGER4             | 5734         | 3.878922 | 0.421399 |
| 212594_at   | programmed cell death 4 (neoplastic transformation inhibitor)                                                   | PDCD4              | 27250        | 3.870662 | 0.421399 |
| 202643_s_at | tumor necrosis factor, alpha-induced protein 3                                                                  | TNFAIP3            | 7128         | 3.86239  | 0.421399 |
| 203725_at   | growth arrest and DNA-damage-inducible, alpha                                                                   | GADD45A            | 1647         | 3.860574 | 0.421399 |
| 216834_at   | regulator of G-protein signaling 1                                                                              | RGS1               | 5996         | 3.838977 | 0.421399 |
| 210538_s_at | baculoviral IAP repeat-containing 3                                                                             | BIRC3              | 330          | 3.78425  | 0.421399 |
| 201195_s_at | solute carrier family 7 (cationic amino acid transporter, y+ system), member 5                                  | SLC7A5             | 8140         | 3.77992  | 0.421399 |
| 203708_at   | phosphodiesterase 4B, cAMP-specific (phosphodiesterase E4 dunce homolog, Drosophila)                            | PDE4B              | 5142         | 3.736681 | 0.421399 |
| 203413_at   | NEL-like 2 (chicken)                                                                                            | NELL2              | 4753         | 3.736636 | 0.421399 |
| 211426_x_at | guanine nucleotide binding protein (G protein), q polypeptide                                                   | GNAQ               | 2776         | 3.718252 | 0.421399 |
| 202644_s_at | tumor necrosis factor, alpha-induced protein 3                                                                  | TNFAIP3            | 7128         | 3.699406 | 0.421399 |
| 208744_x_at | heat shock 105kDa/110kDa protein 1                                                                              | HSPH1              | 10808        | 3.685959 | 0.421399 |
| 221618_s_at | TAF9B RNA polymerase II, TATA box binding protein (TBP)-associated factor, 31kDa /// similar to transcripti     | LOC728198 // 51616 | 728          | 3.685703 | 0.421399 |
| 202988_s_at | regulator of G-protein signaling 1                                                                              | RGS1               | 5996         | 3.681003 | 0.421399 |
| 218346_s_at | sestrin 1                                                                                                       | SESN1              | 27244        | 3.675679 | 0.421399 |
| 204093_at   | cyclin H                                                                                                        | CCNH               | 902          | 3.665929 | 0.421399 |
| 202147_s_at | interferon-related developmental regulator 1                                                                    | IFRD1              | 3475         | 3.663846 | 0.421399 |
| 202612_s_at | mediator complex subunit 14                                                                                     | MED14              | 9282         | 3.642599 | 0.428654 |
| 219220_x_at | mitochondrial ribosomal protein S22                                                                             | MRPS22             | 56945        | 3.6085   | 0.433373 |
| 217434_at   | melanocortin 2 receptor (adrenocorticotrophic hormone)                                                          | MC2R               | 4158         | 3.603807 | 0.433373 |
| 213198_at   | activin A receptor, type IB                                                                                     | ACVR1B             | 91           | 3.54465  | 0.471311 |
| 215671_at   | phosphodiesterase 4B, cAMP-specific (phosphodiesterase E4 dunce homolog, Drosophila)                            | PDE4B              | 5142         | 3.535287 | 0.4723   |
| 212828_at   | synaptotagmin 2                                                                                                 | SYNJ2              | 8871         | 3.52019  | 0.47591  |
| 205667_at   | Werner syndrome                                                                                                 | WRN                | 7486         | 3.445721 | 0.524274 |
| 212774_at   | zinc finger protein 238                                                                                         | ZNF238             | 10472        | 3.429588 | 0.524274 |
| 212652_s_at | sorting nexin 4                                                                                                 | SNX4               | 8723         | 3.427343 | 0.524274 |
| 210440_s_at | CDC14 cell division cycle 14 homolog A (S. cerevisiae)                                                          | CDC14A             | 8556         | 3.409686 | 0.524274 |
| 222366_at   | Transcribed locus                                                                                               | ---                | ---          | 3.408979 | 0.524274 |
| 212842_x_at | RANBP2-like and GRIP domain containing 5 /// RANBP2-like and GRIP domain containing 4 /// RANBP2-like a         | RGPD4 // RG        | 285190 // 72 | 3.404826 | 0.524274 |
| 221756_at   | phosphoinositide-3-kinase interacting protein 1                                                                 | PIK3IP1            | 113791       | 3.393236 | 0.524274 |
| 211856_x_at | CD28 molecule                                                                                                   | CD28               | 940          | 3.377707 | 0.524274 |
| 212723_at   | jumonji domain containing 6                                                                                     | JMJD6              | 23210        | 3.36603  | 0.524274 |
| 204155_s_at | KIAA0999 protein                                                                                                | KIAA0999           | 23387        | 3.360743 | 0.524274 |
| 200911_s_at | transforming, acidic coiled-coil containing protein 1                                                           | TACC1              | 6867         | 3.359818 | 0.524274 |
| 201260_s_at | synaptophysin-like 1                                                                                            | SYPL1              | 6856         | 3.356806 | 0.524274 |
| 213161_at   | chromosome 9 open reading frame 97                                                                              | C9orf97            | 158427       | 3.316162 | 0.562181 |
| 208113_x_at | poly(A) binding protein, cytoplasmic 3                                                                          | PABPC3             | 5042         | 3.309036 | 0.562181 |
| 204567_s_at | ATP-binding cassette, sub-family G (WHITE), member 1                                                            | ABCG1              | 9619         | 3.301306 | 0.562181 |
| 216507_at   | transmembrane anterior posterior transformation 1                                                               | TAPT1              | 202018       | 3.298073 | 0.562181 |
| 217783_s_at | yippee-like 5 (Drosophila)                                                                                      | YPLE5              | 51646        | 3.278703 | 0.569778 |
| 222149_x_at | golgi autoantigen, golgin subfamily a, 8G /// golgi autoantigen, golgin subfamily a, 8E /// golgin-like hypothe | FLJ32679 // C      | 283768 // 39 | 3.261185 | 0.572938 |
| 207785_s_at | recombination signal binding protein for immunoglobulin kappa J region                                          | RBPJ               | 3516         | 3.254771 | 0.572938 |
| 206240_s_at | zinc finger protein 136                                                                                         | ZNF136             | 7695         | 3.242229 | 0.578032 |
| 211302_s_at | phosphodiesterase 4B, cAMP-specific (phosphodiesterase E4 dunce homolog, Drosophila)                            | PDE4B              | 5142         | 3.240741 | 0.578032 |
| 217936_at   | Rho GTPase activating protein 5                                                                                 | ARHGAP5            | 394          | 3.238402 | 0.578032 |
| 213097_s_at | zuotin related factor 1                                                                                         | ZRF1               | 27000        | 3.230394 | 0.584702 |
| 211956_s_at | eukaryotic translation initiation factor 1                                                                      | EIF1               | 10209        | 3.218113 | 0.592547 |
| 220009_at   | LON peptidase N-terminal domain and ring finger 3                                                               | LONRF3             | 79836        | 3.217957 | 0.592547 |
| 205239_at   | amphiregulin (schwannoma-derived growth factor) /// similar to Amphiregulin precursor (AR) (Colorectum ce       | AREG // LOC        | 374 // 72773 | 3.193815 | 0.620402 |
| 203758_at   | cathepsin O                                                                                                     | CTSO               | 1519         | 3.157571 | 0.65843  |
| 207041_at   | mannan-binding lectin serine peptidase 2                                                                        | MASP2              | 10747        | 3.152405 | 0.659793 |
| 202027_at   | transmembrane protein 184B                                                                                      | TMEM184B           | 25829        | 3.149718 | 0.659793 |
| 204015_s_at | dual specificity phosphatase 4                                                                                  | DUSP4              | 1846         | 3.133074 | 0.665781 |
| 209267_s_at | solute carrier family 39 (zinc transporter), member 8                                                           | SLC39A8            | 64116        | 3.132592 | 0.665781 |
| 214081_at   | plexin domain containing 1                                                                                      | PLXDC1             | 57125        | 3.116051 | 0.668264 |
| 203053_at   | breast carcinoma amplified sequence 2                                                                           | BCAS2              | 10286        | 3.114933 | 0.668264 |
| 218311_at   | mitogen-activated protein kinase kinase kinase kinase 3                                                         | MAP4K3             | 8491         | 3.109655 | 0.668264 |
| 217843_s_at | mediator complex subunit 4                                                                                      | MED4               | 29079        | 3.107119 | 0.668264 |
| 214700_x_at | RAP1 interacting factor homolog (yeast)                                                                         | RIF1               | 55183        | 3.104424 | 0.668264 |
| 219700_at   | plexin domain containing 1                                                                                      | PLXDC1             | 57125        | 3.098819 | 0.668264 |
| 219312_s_at | zinc finger and BTB domain containing 10                                                                        | ZBTB10             | 65986        | 3.077987 | 0.679372 |
| 217142_at   | similar to Elongation Factor family member (eft-4)                                                              | LOC442215          | 442215       | 3.077047 | 0.679372 |
| 204433_s_at | spermatogenesis associated 2                                                                                    | SPATA2             | 9825         | 3.074281 | 0.679372 |
| 204995_at   | cyclin-dependent kinase 5, regulatory subunit 1 (p35)                                                           | CDK5R1             | 8851         | 3.062    | 0.686712 |
| 211596_s_at | leucine-rich repeats and immunoglobulin-like domains 1                                                          | LRIG1              | 26018        | 3.060855 | 0.686712 |
| 212400_at   | family with sequence similarity 102, member A                                                                   | FAM102A            | 399665       | 3.020866 | 0.707388 |
| 212561_at   | RAB6 interacting protein 1                                                                                      | RAB6IP1            | 23258        | 3.016257 | 0.707388 |
| 202866_at   | DnaJ (Hsp40) homolog, subfamily B, member 12                                                                    | DNAJB12            | 54788        | 3.01409  | 0.707388 |
| 206621_s_at | eukaryotic translation initiation factor 4H                                                                     | EIF4H              | 7458         | 3.013139 | 0.707388 |
| 216056_at   | CD44 molecule (Indian blood group)                                                                              | CD44               | 960          | 3.007286 | 0.707388 |
| 201800_s_at | oxysterol binding protein                                                                                       | OSBP               | 5007         | 2.989052 | 0.707388 |
| 222308_x_at | Transcribed locus                                                                                               | ---                | ---          | 2.988094 | 0.707388 |
| 208881_x_at | isopentenyl-diphosphate delta isomerase 1                                                                       | ID1                | 3422         | 2.977631 | 0.707388 |
| 216823_at   | ribosomal protein S3A /// similar to ribosomal protein S3a /// similar to 40S ribosomal protein S3a (V-fos tra  | LOC146053 //       | 146053 // 39 | 2.97665  | 0.707388 |
| 202371_at   | transcription elongation factor A (SII)-like 4                                                                  | TCEAL4             | 79921        | 2.968666 | 0.707388 |
| 218149_s_at | zinc finger protein 395                                                                                         | ZNF395             | 55893        | 2.968342 | 0.707388 |
| 220657_at   | kelch-like 11 (Drosophila)                                                                                      | KLHL11             | 55175        | 2.967117 | 0.707388 |
| 209682_at   | Cas-Br-M (murine) ecotropic retroviral transforming sequence b                                                  | CBLB               | 868          | 2.965748 | 0.707388 |
| 205798_at   | interleukin 7 receptor                                                                                          | IL7R               | 3575         | 2.956947 | 0.710946 |
| 221423_s_at | Yip1 domain family, member 5                                                                                    | YIPF5              | 81555        | 2.953985 | 0.710946 |
| 214177_s_at | pre-B-cell leukemia homeobox interacting protein 1                                                              | PBXIP1             | 57326        | 2.952906 | 0.710946 |
| 215915_at   | GULP, engulfment adaptor PTB domain containing 1                                                                | GULP1              | 51454        | 2.937958 | 0.729414 |
| 220671_at   | CCR4 carbon catabolite repression 4-like (S. cerevisiae)                                                        | CCRN4L             | 25819        | 2.934848 | 0.729414 |

Supplementary Table 2: HIV-specific CD8 T cells Progressors vs. Controllers

|             |                                                                                                                 |                             |        |          |          |
|-------------|-----------------------------------------------------------------------------------------------------------------|-----------------------------|--------|----------|----------|
| 212439_at   | inositol hexaphosphate kinase 1                                                                                 | IHPK1                       | 9807   | 2.91777  | 0.744465 |
| 214910_s_at | apolipoprotein M                                                                                                | APOM                        | 55937  | 2.917463 | 0.744465 |
| 209871_s_at | amyloid beta (A4) precursor protein-binding, family A, member 2 (X11-like)                                      | APBA2                       | 321    | 2.901997 | 0.74575  |
| 56919_at    | WD repeat domain 48                                                                                             | WDR48                       | 57599  | 2.900309 | 0.74575  |
| 212479_s_at | required for meiotic nuclear division 5 homolog A (S. cerevisiae)                                               | RMND5A                      | 64795  | 2.893239 | 0.74575  |
| 214480_at   | ets variant gene 3                                                                                              | ETV3                        | 2117   | 2.871235 | 0.763884 |
| 210281_s_at | zinc finger, MYM-type 2                                                                                         | ZMYM2                       | 7750   | 2.865801 | 0.763884 |
| 212098_at   | hypothetical protein LOC151162                                                                                  | LOC151162                   | 151162 | 2.862768 | 0.763884 |
| 213737_x_at | golgi autoantigen, golgin subfamily a, 8G /// golgi autoantigen, golgin subfamily a, 8E /// golgin-like hypothe | FLJ32679 /// C283768 /// 39 |        | 2.859986 | 0.763884 |
| 202731_at   | programmed cell death 4 (neoplastic transformation inhibitor)                                                   | PDCD4                       | 27250  | 2.859792 | 0.763884 |
| 204064_at   | THO complex 1                                                                                                   | THOC1                       | 9984   | 2.854056 | 0.769097 |
| 209824_s_at | aryl hydrocarbon receptor nuclear translocator-like                                                             | ARNTL                       | 406    | 2.852889 | 0.769097 |
| 215592_at   | CDNA FLJ12232 fis. clone MAMMA1001206                                                                           | ---                         | ---    | 2.851328 | 0.769097 |
| 221821_s_at | chromosome 12 open reading frame 41                                                                             | C12orf41                    | 54934  | 2.840881 | 0.778228 |
| 207113_s_at | tumor necrosis factor (TNF superfamily, member 2)                                                               | TNF                         | 7124   | 2.833033 | 0.782863 |
| 213285_at   | transmembrane protein 30B                                                                                       | TMEM30B                     | 161291 | 2.829208 | 0.786818 |
| 213615_at   | Membrane bound O-acyltransferase domain containing 5                                                            | MBOAT5                      | 10162  | 2.809843 | 0.813    |
| 220814_at   | ---                                                                                                             | ---                         | ---    | 2.807338 | 0.813    |
| 207184_at   | solute carrier family 6 (neurotransmitter transporter, GABA), member 13                                         | SLC6A13                     | 6540   | 2.80416  | 0.813    |
| 208122_x_at | killer cell immunoglobulin-like receptor, two domains, short cytoplasmic tail, 3                                | KIR2DS3                     | 3808   | 2.803959 | 0.813    |
| 204568_at   | KIAA0831                                                                                                        | KIAA0831                    | 22863  | 2.797555 | 0.814269 |
| 208910_s_at | complement component 1, q subcomponent binding protein                                                          | C1QBP                       | 708    | 2.79368  | 0.818641 |
| 208624_s_at | eukaryotic translation initiation factor 4 gamma, 1                                                             | EIF4G1                      | 1981   | 2.786457 | 0.824301 |
| 211449_at   | mutS homolog 6 (E. coli)                                                                                        | MSH6                        | 2956   | 2.783996 | 0.824301 |
| 221127_s_at | regulated in glioma                                                                                             | RIG                         | 10530  | 2.783884 | 0.824301 |
| 214775_at   | Nedd4 binding protein 3                                                                                         | N4BP3                       | 23138  | 2.77957  | 0.826033 |
| 217191_x_at | ---                                                                                                             | ---                         | ---    | 2.774094 | 0.830816 |
| 204135_at   | filamin A interacting protein 1-like                                                                            | FILIP1L                     | 11259  | 2.772083 | 0.830816 |
| 216248_s_at | nuclear receptor subfamily 4, group A, member 2                                                                 | NR4A2                       | 4929   | 2.768435 | 0.83379  |
| 204615_x_at | isopentenyl-diphosphate delta isomerase 1                                                                       | IDI1                        | 3422   | 2.767244 | 0.83379  |
| 203543_s_at | Kruppel-like factor 9                                                                                           | KLF9                        | 687    | 2.757837 | 0.843005 |
| 218784_s_at | chromosome 6 open reading frame 64                                                                              | C6orf64                     | 55776  | 2.746884 | 0.848523 |
| 218472_s_at | pelota homolog (Drosophila)                                                                                     | PELO                        | 53918  | 2.739202 | 0.852106 |
| 204992_s_at | profilin 2                                                                                                      | PFN2                        | 5217   | 2.734342 | 0.852106 |
| 203313_s_at | TGF-beta-induced factor homeobox 1                                                                              | TGIF1                       | 7050   | 2.731691 | 0.852106 |
| 214176_s_at | Transcribed locus                                                                                               | ---                         | ---    | 2.728847 | 0.852106 |
| 209181_s_at | Rab geranylgeranyltransferase, beta subunit                                                                     | RABGGTB                     | 5876   | 2.718975 | 0.852106 |
| 213547_at   | cullin-associated and neddylation-dissociated 2 (putative)                                                      | CAND2                       | 23066  | 2.716758 | 0.852106 |
| 202193_at   | LIM domain kinase 2                                                                                             | LIMK2                       | 3985   | 2.715031 | 0.852106 |
| 213555_at   | RWD domain containing 2A                                                                                        | RWDD2A                      | 112611 | 2.714331 | 0.852106 |
| 214247_s_at | dickkopf homolog 3 (Xenopus laevis)                                                                             | DKK3                        | 27122  | 2.71381  | 0.852106 |
| 207735_at   | ring finger protein 125                                                                                         | RNF125                      | 54941  | 2.712912 | 0.852106 |
| 219132_at   | pellino homolog 2 (Drosophila)                                                                                  | PELI2                       | 57161  | 2.712876 | 0.852106 |
| 218399_s_at | cell division cycle associated 4                                                                                | CDCA4                       | 55038  | 2.710363 | 0.852106 |
| 213518_at   | protein kinase C, iota                                                                                          | PRKCI                       | 5584   | 2.708574 | 0.852106 |
| 215716_s_at | ATPase, Ca++ transporting, plasma membrane 1                                                                    | ATP2B1                      | 490    | 2.703858 | 0.853874 |
| 209535_s_at | ---                                                                                                             | ---                         | ---    | 2.702875 | 0.853874 |
| 208673_s_at | splicing factor, arginine/serine-rich 3                                                                         | SFRS3                       | 6428   | 2.700417 | 0.853874 |
| 202595_s_at | leptin receptor overlapping transcript-like 1                                                                   | LEPROTL1                    | 23484  | 2.69904  | 0.853874 |
| 202165_at   | protein phosphatase 1, regulatory (inhibitor) subunit 2                                                         | PPP1R2                      | 5504   | 2.69716  | 0.853874 |
| 201259_s_at | synaptophysin-like 1                                                                                            | SYPL1                       | 6856   | 2.694686 | 0.853874 |
| 220643_s_at | Fas apoptotic inhibitory molecule                                                                               | FAIM                        | 55179  | 2.693547 | 0.853874 |
| 212063_at   | CD44 molecule (Indian blood group)                                                                              | CD44                        | 960    | 2.693352 | 0.853874 |
| 213970_at   | RAB, member of RAS oncogene family-like 3 /// similar to RAB, member of RAS oncogene family-like 3              | LOC653256 /// 285282 /// 65 |        | 2.687393 | 0.853874 |
| 217579_x_at | Transcribed locus                                                                                               | ---                         | ---    | 2.678399 | 0.853874 |
| 218577_at   | leucine rich repeat containing 40                                                                               | LRRC40                      | 55631  | 2.673808 | 0.853874 |
| 207681_at   | chemokine (C-X-C motif) receptor 3                                                                              | CXCR3                       | 2833   | 2.670851 | 0.853874 |
| 204622_x_at | nuclear receptor subfamily 4, group A, member 2                                                                 | NR4A2                       | 4929   | 2.668807 | 0.853874 |
| 214871_x_at | CDNA clone IMAGE:3347954                                                                                        | ---                         | ---    | 2.664172 | 0.853874 |
| 203408_s_at | SATB homeobox 1                                                                                                 | SATB1                       | 6304   | 2.659846 | 0.853874 |
| 205836_s_at | YTH domain containing 2                                                                                         | YTHDC2                      | 64848  | 2.658214 | 0.853874 |
| 206587_at   | chaperonin containing TCP1, subunit 6B (zeta 2)                                                                 | CCT6B                       | 10693  | 2.656478 | 0.853874 |
| 218252_at   | cytoskeleton associated protein 2                                                                               | CKAP2                       | 26586  | 2.655766 | 0.853874 |
| 215157_x_at | poly(A) binding protein, cytoplasmic 1                                                                          | PABPC1                      | 26986  | 2.65513  | 0.853874 |
| 217709_at   | ---                                                                                                             | ---                         | ---    | 2.649384 | 0.859457 |
| 202381_at   | ADAM metalloproteinase domain 9 (meltrin gamma)                                                                 | ADAM9                       | 8754   | 2.645573 | 0.860415 |
| 204334_at   | Kruppel-like factor 7 (ubiquitous)                                                                              | KLF7                        | 8609   | 2.642512 | 0.860415 |
| 216962_at   | RPA interacting protein                                                                                         | RPAIN                       | 84268  | 2.638828 | 0.862215 |
| 206055_s_at | small nuclear ribonucleoprotein polypeptide A'                                                                  | SNRPA1                      | 6627   | 2.629298 | 0.866649 |
| 65591_at    | WD repeat domain 48                                                                                             | WDR48                       | 57599  | 2.629056 | 0.866649 |
| 208144_s_at | ---                                                                                                             | ---                         | ---    | 2.628945 | 0.866649 |
| 212648_at   | DEAH (Asp-Glu-Ala-His) box polypeptide 29                                                                       | DHX29                       | 54505  | 2.621064 | 0.873794 |
| 214801_at   | CDNA FLJ11392 fis. clone HEMBA1000575                                                                           | ---                         | ---    | 2.618272 | 0.874998 |
| 210871_x_at | synovial sarcoma, X breakpoint 2 interacting protein                                                            | SSX2IP                      | 117178 | 2.612874 | 0.880393 |
| 219276_x_at | chromosome 9 open reading frame 82                                                                              | C9orf82                     | 79886  | 2.606586 | 0.886545 |
| 206910_x_at | complement factor H-related 2                                                                                   | CFHR2                       | 3080   | 2.605852 | 0.886545 |
| 201181_at   | guanine nucleotide binding protein (G protein), alpha inhibiting activity polypeptide 3                         | GNAI3                       | 2773   | 2.602662 | 0.888013 |
| 214332_s_at | Ts translation elongation factor, mitochondrial                                                                 | TSFM                        | 10102  | 2.601444 | 0.888013 |
| 208989_s_at | F-box and leucine-rich repeat protein 11                                                                        | FBXL11                      | 22992  | 2.594543 | 0.890175 |
| 201408_at   | protein phosphatase 1, catalytic subunit, beta isoform                                                          | PPP1CB                      | 5500   | 2.59275  | 0.890891 |
| 207877_s_at | nuclear VCP-like                                                                                                | NVL                         | 4931   | 2.588869 | 0.892861 |
| 200004_at   | eukaryotic translation initiation factor 4 gamma, 2                                                             | EIF4G2                      | 1982   | 2.583782 | 0.900002 |
| 203006_at   | inositol polyphosphate-5-phosphatase, 40kDa                                                                     | INPP5A                      | 3632   | 2.581643 | 0.902077 |
| 209609_s_at | mitochondrial ribosomal protein L9                                                                              | MRPL9                       | 65005  | 2.572996 | 0.913069 |
| 209149_s_at | transmembrane 9 superfamily member 1                                                                            | TM9SF1                      | 10548  | 2.572861 | 0.913069 |
| 213224_s_at | hypothetical protein LOC92482                                                                                   | LOC92482                    | 92482  | 2.563975 | 0.919927 |
| 209273_s_at | iron-sulfur cluster assembly 1 homolog (S. cerevisiae)                                                          | ISCA1                       | 81689  | 2.563248 | 0.919927 |
| 212177_at   | splicing factor, arginine/serine-rich 18                                                                        | SFRS18                      | 25957  | 2.554404 | 0.919927 |
| 53987_at    | RAN binding protein 10                                                                                          | RANBP10                     | 57610  | 2.549391 | 0.919927 |
| 218203_at   | asparagine-linked glycosylation 5 homolog (S. cerevisiae, dolichyl-phosphate beta-glucosyltransferase)          | ALG5                        | 29880  | 2.543379 | 0.919927 |
| 219117_s_at | FK506 binding protein 11, 19 kDa                                                                                | FKBP11                      | 51303  | 2.541763 | 0.919927 |
| 201504_s_at | translin                                                                                                        | TSN                         | 7247   | 2.541723 | 0.919927 |

Supplementary Table 2: HIV-specific CD8 T cells Progressors vs. Controllers

|             |                                                                                                              |                            |        |          |          |
|-------------|--------------------------------------------------------------------------------------------------------------|----------------------------|--------|----------|----------|
| 212782_x_at | polymerase (RNA) II (DNA directed) polypeptide J. 13.3kDa                                                    | POLR2J                     | 5439   | 2.541173 | 0.919927 |
| 206147_x_at | sex comb on midleg-like 2 (Drosophila)                                                                       | SCML2                      | 10389  | 2.540181 | 0.919927 |
| 216062_at   | Transcribed locus                                                                                            | ---                        | ---    | 2.539996 | 0.919927 |
| 208798_x_at | golgi autoantigen. golgin subfamily a. 8A                                                                    | GOLGA8A                    | 23015  | 2.534337 | 0.930224 |
| 201070_x_at | splicing factor 3b. subunit 1. 155kDa                                                                        | SF3B1                      | 23451  | 2.52693  | 0.934755 |
| 203580_s_at | solute carrier family 7 (cationic amino acid transporter. y+ system). member 6                               | SLC7A6                     | 9057   | 2.526793 | 0.934755 |
| 220386_s_at | echinoderm microtubule associated protein like 4                                                             | EML4                       | 27436  | 2.523807 | 0.934755 |
| 209898_x_at | intersectin 2                                                                                                | ITSN2                      | 50618  | 2.523776 | 0.934755 |
| 218017_s_at | heparan-alpha-glucosaminide N-acetyltransferase                                                              | HGSNAT                     | 138050 | 2.520065 | 0.934878 |
| 212508_at   | modulator of apoptosis 1                                                                                     | MOAP1                      | 64112  | 2.519008 | 0.934878 |
| 217028_at   | chemokine (C-X-C motif) receptor 4                                                                           | CXCR4                      | 7852   | 2.518981 | 0.934878 |
| 215167_at   | mediator complex subunit 14                                                                                  | MED14                      | 9282   | 2.517989 | 0.934878 |
| 208190_s_at | lipolysis stimulated lipoprotein receptor                                                                    | LSR                        | 51599  | 2.51541  | 0.9383   |
| 218587_s_at | KTEL (Lys-Tyr-Glu-Leu) containing 1                                                                          | KTELC1                     | 56983  | 2.512075 | 0.940768 |
| 215951_at   | TBC1 domain family. member 2B                                                                                | TBC1D2B                    | 23102  | 2.509793 | 0.940768 |
| 214446_at   | elongation factor. RNA polymerase II. 2                                                                      | ELL2                       | 22936  | 2.508233 | 0.940768 |
| 219361_s_at | interferon stimulated exonuclease gene 20kDa-like 1                                                          | ISG20L1                    | 64782  | 2.506478 | 0.941568 |
| 203775_at   | solute carrier family 25. member 13 (citrin)                                                                 | SLC25A13                   | 10165  | 2.504291 | 0.944149 |
| 221986_s_at | kelch-like 24 (Drosophila)                                                                                   | KLHL24                     | 54800  | 2.503127 | 0.944387 |
| 214327_x_at | tumor protein. translationally-controlled 1                                                                  | TPT1                       | 7178   | 2.494126 | 0.94564  |
| 208968_s_at | cytokine induced apoptosis inhibitor 1                                                                       | CIAPIN1                    | 57019  | 2.492988 | 0.94564  |
| 221894_at   | aarF domain containing kinase 2                                                                              | ADCK2                      | 90956  | 2.492683 | 0.94564  |
| 211955_at   | RAN binding protein 5                                                                                        | RANBP5                     | 3843   | 2.491585 | 0.94564  |
| 204270_at   | v-ski sarcoma viral oncogene homolog (avian)                                                                 | SKI                        | 6497   | 2.491374 | 0.94564  |
| 203865_s_at | adenosine deaminase. RNA-specific. B1 (RED1 homolog rat)                                                     | ADARB1                     | 104    | 2.48929  | 0.94564  |
| 215053_at   | Snf2-related CREBBP activator protein                                                                        | SRCAP                      | 10847  | 2.486605 | 0.94564  |
| 202181_at   | KIAA0247                                                                                                     | KIAA0247                   | 9766   | 2.485502 | 0.94564  |
| 212284_x_at | tumor protein. translationally-controlled 1                                                                  | TPT1                       | 7178   | 2.485277 | 0.94564  |
| 219717_at   | chromosome 4 open reading frame 30                                                                           | C4orf30                    | 54876  | 2.485262 | 0.94564  |
| 202523_s_at | sparc/osteonectin. cwcv and kazal-like domains proteoglycan (testican) 2                                     | SPOCK2                     | 9806   | 2.48326  | 0.94564  |
| 205540_s_at | Ras-related GTP binding B                                                                                    | RRAGB                      | 10325  | 2.48273  | 0.94564  |
| 201389_at   | integrin. alpha 5 (fibronectin receptor. alpha polypeptide)                                                  | ITGA5                      | 3678   | 2.477595 | 0.945648 |
| 202843_at   | DnaJ (Hsp40) homolog. subfamily B. member 9                                                                  | DNAJB9                     | 4189   | 2.47685  | 0.945648 |
| 218579_s_at | DEAH (Asp-Glu-Ala-His) box polypeptide 35                                                                    | DHX35                      | 60625  | 2.475459 | 0.945989 |
| 214683_s_at | CDC-like kinase 1                                                                                            | CLK1                       | 1195   | 2.473706 | 0.945989 |
| 212434_at   | GrpE-like 1. mitochondrial (E. coli)                                                                         | GRPEL1                     | 80273  | 2.472534 | 0.945989 |
| 211893_x_at | CD6 molecule                                                                                                 | CD6                        | 923    | 2.470514 | 0.945989 |
| 205966_at   | TAF13 RNA polymerase II. TATA box binding protein (TBP)-associated factor. 18kDa                             | TAF13                      | 6884   | 2.46959  | 0.945989 |
| 207079_s_at | mediator complex subunit 6                                                                                   | MED6                       | 10001  | 2.464536 | 0.945989 |
| 218386_x_at | ubiquitin specific peptidase 16                                                                              | USP16                      | 10600  | 2.46445  | 0.945989 |
| 202146_at   | interferon-related developmental regulator 1                                                                 | IFRD1                      | 3475   | 2.462514 | 0.945989 |
| 202436_s_at | cytochrome P450. family 1. subfamily B. polypeptide 1                                                        | CYP1B1                     | 1545   | 2.456843 | 0.953221 |
| 203380_x_at | splicing factor. arginine/serine-rich 5                                                                      | SFRS5                      | 6430   | 2.455063 | 0.955096 |
| 201417_at   | SRY (sex determining region Y)-box 4                                                                         | SOX4                       | 6659   | 2.453488 | 0.955994 |
| 200921_s_at | B-cell translocation gene 1. anti-proliferative                                                              | BTG1                       | 694    | 2.451227 | 0.955994 |
| 204790_at   | SMAD family member 7                                                                                         | SMAD7                      | 4092   | 2.4503   | 0.955994 |
| 206976_s_at | heat shock 105kDa/110kDa protein 1                                                                           | HSPH1                      | 10808  | 2.446554 | 0.955994 |
| 212722_s_at | jumonji domain containing 6                                                                                  | JMJD6                      | 23210  | 2.444481 | 0.955994 |
| 210017_at   | mucosa associated lymphoid tissue lymphoma translocation gene 1                                              | MALT1                      | 10892  | 2.443662 | 0.955994 |
| 205259_at   | nuclear receptor subfamily 3. group C. member 2                                                              | NR3C2                      | 4306   | 2.440498 | 0.955994 |
| 215823_x_at | poly(A) binding protein. cytoplasmic 3 /// poly(A) binding protein. cytoplasmic 1 /// hypothetical LOC341315 | LOC341315 // 26986 /// 341 |        | 2.439228 | 0.955994 |
| 212089_at   | Iamin A/C                                                                                                    | LMNA                       | 4000   | 2.436625 | 0.956222 |
| 212014_x_at | CD44 molecule (Indian blood group)                                                                           | CD44                       | 960    | 2.435005 | 0.95725  |
| 208724_s_at | RAB1A. member RAS oncogene family                                                                            | RAB1A                      | 5861   | 2.429922 | 0.963147 |
| 200082_s_at | ribosomal protein S7 /// similar to 40S ribosomal protein S7 (S8)                                            | LOC644315 // 6201 /// 6443 |        | 2.421208 | 0.965103 |
| 210054_at   | chromosome 4 open reading frame 15                                                                           | C4orf15                    | 79441  | 2.420858 | 0.965103 |
| 219028_at   | homeodomain interacting protein kinase 2                                                                     | HIPK2                      | 28996  | 2.415199 | 0.965103 |
| 218218_at   | adaptor protein. phosphotyrosine interaction. PH domain and leucine zipper containing 2                      | APPL2                      | 55198  | 2.415134 | 0.965103 |
| 213310_at   | Eukaryotic translation initiation factor 2C. 2                                                               | EIF2C2                     | 27161  | 2.4133   | 0.965103 |
| 221773_at   | ELK3. ETS-domain protein (SRF accessory protein 2)                                                           | ELK3                       | 2004   | 2.413153 | 0.965103 |
| 212447_at   | kelch repeat and BTB (POZ) domain containing 2                                                               | KBTBD2                     | 25948  | 2.412631 | 0.965103 |
| 206404_at   | fibroblast growth factor 9 (glia-activating factor)                                                          | FGF9                       | 2254   | 2.412065 | 0.965103 |
| 201513_at   | translin                                                                                                     | TSN                        | 7247   | 2.410556 | 0.965103 |
| 217998_at   | pleckstrin homology-like domain. family A. member 1 /// hypothetical LOC652993                               | LOC652993 // 22822 /// 652 |        | 2.410412 | 0.965103 |
| 214125_s_at | Neuron derived neurotrophic factor                                                                           | NENF                       | 29937  | 2.410151 | 0.965103 |
| 209185_s_at | insulin receptor substrate 2                                                                                 | IRS2                       | 8660   | 2.40643  | 0.965484 |
| 208160_at   | hypothetical protein FLJ10232                                                                                | FLJ10232                   | 55099  | 2.404512 | 0.965484 |
| 209712_at   | solute carrier family 35 (UDP-glucuronic acid/UDP-N-acetylglucosamine dual transporter). member D1           | SLC35D1                    | 23169  | 2.403846 | 0.965484 |
| 216044_x_at | family with sequence similarity 69. member A                                                                 | FAM69A                     | 388650 | 2.395344 | 0.968985 |
| 37433_at    | protein inhibitor of activated STAT. 2                                                                       | PIAS2                      | 9063   | 2.394352 | 0.968985 |
| 209993_at   | ATP-binding cassette. sub-family B (MDR/TAP). member 1                                                       | ABCB1                      | 5243   | 2.393495 | 0.968985 |
| 206337_at   | chemokine (C-C motif) receptor 7                                                                             | CCR7                       | 1236   | 2.391027 | 0.968985 |
| 206114_at   | EPH receptor A4                                                                                              | EPHA4                      | 2043   | 2.390647 | 0.968985 |
| 208804_s_at | splicing factor. arginine/serine-rich 6                                                                      | SFRS6                      | 6431   | 2.389085 | 0.968985 |
| 221768_at   | Splicing factor proline/glutamine-rich (polypyrimidine tract binding protein associated)                     | SFPQ                       | 6421   | 2.388672 | 0.968985 |
| 206156_at   | gap junction protein. beta 5. 31.1kDa                                                                        | GJB5                       | 2709   | 2.387915 | 0.968985 |
| 202565_s_at | supervillin                                                                                                  | SVIL                       | 6840   | 2.387738 | 0.968985 |
| 214879_x_at | upstream transcription factor 2. c-fos interacting                                                           | USF2                       | 7392   | 2.38314  | 0.973168 |
| 214124_x_at | Transcribed locus                                                                                            | ---                        | ---    | 2.382812 | 0.973168 |
| 222326_at   | Transcribed locus                                                                                            | ---                        | ---    | 2.382554 | 0.973168 |
| 216945_x_at | PAS domain containing serine/threonine kinase                                                                | PASK                       | 23178  | 2.378087 | 0.97962  |
| 201917_s_at | solute carrier family 25. member 36                                                                          | SLC25A36                   | 55186  | 2.376248 | 0.981949 |
| 216282_x_at | polymerase (RNA) II (DNA directed) polypeptide C. 33kDa                                                      | POLR2C                     | 5432   | 2.375281 | 0.982256 |
| 220271_x_at | EF-hand calcium binding domain 6                                                                             | EFCAB6                     | 64800  | 2.370658 | 0.982963 |
| 60815_at    | polymerase (RNA) II (DNA directed) polypeptide J. 13.3kDa pseudogene                                         | POLR2J4                    | 84820  | 2.37039  | 0.982963 |
| 214129_at   | similar to phosphodiesterase 4D interacting protein isoform 2                                                | LOC727942                  | 727942 | 2.370315 | 0.982963 |
| 221425_s_at | iron-sulfur cluster assembly 1 homolog (S. cerevisiae)                                                       | ISCA1                      | 81689  | 2.368778 | 0.982963 |
| 201690_s_at | tumor protein D52                                                                                            | TPD52                      | 7163   | 2.365403 | 0.982963 |
| 213538_at   | SON DNA binding protein                                                                                      | SON                        | 6651   | 2.364927 | 0.982963 |
| 219826_at   | zinc finger protein 419                                                                                      | ZNF419                     | 79744  | 2.363416 | 0.982963 |
| 205100_at   | glutamine-fructose-6-phosphate transaminase 2                                                                | GFPT2                      | 9945   | 2.362071 | 0.982963 |
| 206618_at   | interleukin 18 receptor 1                                                                                    | IL18R1                     | 8809   | 2.36182  | 0.982963 |

Supplementary Table 2: HIV-specific CD8 T cells Progressors vs. Controllers

|             |                                                                                                                     |                             |        |          |          |
|-------------|---------------------------------------------------------------------------------------------------------------------|-----------------------------|--------|----------|----------|
| 202733_at   | procollagen-proline, 2-oxoglutarate 4-dioxygenase (proline 4-hydroxylase), alpha polypeptide II                     | P4HA2                       | 8974   | 2.359704 | 0.983708 |
| 218936_s_at | coiled-coil domain containing 59                                                                                    | CCDC59                      | 29080  | 2.353506 | 0.983708 |
| 217790_s_at | signal sequence receptor, gamma (translocon-associated protein gamma)                                               | SSR3                        | 6747   | 2.349436 | 0.983708 |
| 212154_at   | syndecan 2                                                                                                          | SDC2                        | 6383   | 2.346603 | 0.983708 |
| 202055_at   | karyopherin alpha 1 (importin alpha 5)                                                                              | KPNA1                       | 3836   | 2.345873 | 0.983708 |
| 208602_x_at | CD6 molecule                                                                                                        | CD6                         | 923    | 2.344537 | 0.983708 |
| 202673_at   | dolichyl-phosphate mannosyltransferase polypeptide 1, catalytic subunit                                             | DPM1                        | 8813   | 2.344374 | 0.983708 |
| 217798_at   | CCR4-NOT transcription complex, subunit 2                                                                           | CNOT2                       | 4848   | 2.343613 | 0.983708 |
| 201711_x_at | RAN binding protein 2                                                                                               | RANBP2                      | 5903   | 2.343207 | 0.983708 |
| 217242_at   | zinc finger protein 154                                                                                             | ZNF154                      | 7710   | 2.339597 | 0.985797 |
| 208313_s_at | splicing factor 1                                                                                                   | SF1                         | 7536   | 2.339157 | 0.985797 |
| 211861_x_at | CD28 molecule                                                                                                       | CD28                        | 940    | 2.338931 | 0.985797 |
| 201300_s_at | prion protein (p27-30) (Creutzfeldt-Jakob disease, Gerstmann-Strausler-Scheinker syndrome, fatal familial insomnia) | PRNP                        | 5621   | 2.33728  | 0.985797 |
| 218606_at   | zinc finger, DHHC-type containing 7                                                                                 | ZDHHC7                      | 55625  | 2.331543 | 0.985797 |
| 200705_s_at | eukaryotic translation elongation factor 1 beta 2 /// hCG1983058                                                    | EEF1B2 /// hC1933 /// 6448  |        | 2.329986 | 0.985797 |
| 203068_at   | kelch-like 21 (Drosophila)                                                                                          | KLHL21                      | 9903   | 2.325087 | 0.987521 |
| 221871_s_at | TRK-fused gene                                                                                                      | TFG                         | 10342  | 2.324693 | 0.987521 |
| 215545_at   | ---                                                                                                                 | ---                         | ---    | 2.322949 | 0.989811 |
| 222101_s_at | dachsous 1 (Drosophila)                                                                                             | DCHS1                       | 8642   | 2.319277 | 0.990446 |
| 203357_s_at | calpain 7                                                                                                           | CAPN7                       | 23473  | 2.318887 | 0.990446 |
| 212521_s_at | phosphodiesterase 8A                                                                                                | PDE8A                       | 5151   | 2.318399 | 0.990446 |
| 207339_s_at | lymphotoxin beta (TNF superfamily, member 3)                                                                        | LTB                         | 4050   | 2.314409 | 0.990482 |
| 210117_at   | sperm associated antigen 1                                                                                          | SPAG1                       | 6674   | 2.312762 | 0.990482 |
| 208632_at   | ring finger protein 10                                                                                              | RNF10                       | 9921   | 2.312234 | 0.990482 |
| 202496_at   | enhancer of mRNA decapping 4                                                                                        | EDC4                        | 23644  | 2.311507 | 0.990482 |
| 212869_x_at | tumor protein, translationally-controlled 1                                                                         | TPT1                        | 7178   | 2.308857 | 0.991589 |
| 201257_x_at | ribosomal protein S3A                                                                                               | RPS3A                       | 6189   | 2.307594 | 0.991589 |
| 216342_x_at | similar to 40S ribosomal protein S4, X isoform                                                                      | LOC390183 /// 390183 /// 44 |        | 2.307366 | 0.991589 |
| 209363_s_at | mediator complex subunit 21                                                                                         | MED21                       | 9412   | 2.30657  | 0.991744 |
| 208263_at   | ---                                                                                                                 | ---                         | ---    | 2.304408 | 0.992138 |
| 211113_s_at | ATP-binding cassette, sub-family G (WHITE), member 1                                                                | ABCG1                       | 9619   | 2.301922 | 0.992424 |
| 215889_at   | SKI-like oncogene                                                                                                   | SKIL                        | 6498   | 2.300162 | 0.993134 |
| 209674_at   | cryptochrome 1 (photolyase-like)                                                                                    | CRY1                        | 1407   | 2.295257 | 0.995336 |
| 207310_s_at | nitric oxide synthase 1 (neuronal)                                                                                  | NOS1                        | 4842   | 2.294198 | 0.995336 |
| 207937_x_at | fibroblast growth factor receptor 1 (fms-related tyrosine kinase 2, Pfeiffer syndrome)                              | FGFR1                       | 2260   | 2.293767 | 0.995336 |
| 204203_at   | CCAAT/enhancer binding protein (C/EBP), gamma                                                                       | CEBPG                       | 1054   | 2.293108 | 0.995336 |
| 210995_s_at | tripartite motif-containing 23                                                                                      | TRIM23                      | 373    | 2.292316 | 0.995336 |
| 200719_at   | S-phase kinase-associated protein 1                                                                                 | SKP1                        | 6500   | 2.289812 | 0.995336 |
| 219423_x_at | tumor necrosis factor receptor superfamily, member 25                                                               | TNFRSF25                    | 8718   | 2.287152 | 0.995336 |
| 202160_at   | CREB binding protein (Rubinstein-Taybi syndrome)                                                                    | CREBBP                      | 1387   | 2.286371 | 0.995336 |
| 221617_at   | TAF9B RNA polymerase II, TATA box binding protein (TBP)-associated factor, 31kDa                                    | TAF9B                       | 51616  | 2.285063 | 0.995336 |
| 217822_at   | WW domain binding protein 11                                                                                        | WBP11                       | 51729  | 2.284145 | 0.995786 |
| 216947_at   | desmin                                                                                                              | DES                         | 1674   | 2.28285  | 0.997165 |
| 216297_at   | MRNA; cDNA DKFZp564C156 (from clone DKFZp564C156)                                                                   | ---                         | ---    | 2.280524 | 0.999842 |
| 206545_at   | CD28 molecule                                                                                                       | CD28                        | 940    | 2.279083 | 0.999842 |
| 200893_at   | splicing factor, arginine/serine-rich 10 (transformer 2 homolog, Drosophila)                                        | SFRS10                      | 6434   | 2.277612 | 0.999842 |
| 205042_at   | glucosamine (UDP-N-acetyl)-2-epimerase/N-acetylmannosamine kinase                                                   | GNE                         | 10020  | 2.275836 | 0.999842 |
| 221976_s_at | Hepatooma-derived growth factor, related protein 3                                                                  | HDGFRP3                     | 50810  | 2.273036 | 0.999842 |
| 219864_s_at | RCAN family member 3                                                                                                | RCAN3                       | 11123  | 2.272653 | 0.999842 |
| 205388_at   | troponin C type 2 (fast)                                                                                            | TNNC2                       | 7125   | 2.270959 | 0.999842 |
| 208828_at   | polymerase (DNA directed), epsilon 3 (p17 subunit)                                                                  | POLE3                       | 54107  | 2.270571 | 0.999842 |
| 209501_at   | cerebellar degeneration-related protein 2, 62kDa                                                                    | CDR2                        | 1039   | 2.270007 | 0.999842 |
| 202689_at   | RNA binding motif protein 15B                                                                                       | RBM15B                      | 29890  | 2.268699 | 0.999842 |
| 217824_at   | ubiquitin-conjugating enzyme E2, J1 (UBC6 homolog, yeast)                                                           | UBE2J1                      | 51465  | 2.267532 | 0.999842 |
| 215737_x_at | upstream transcription factor 2, c-fos interacting                                                                  | USF2                        | 7392   | 2.266026 | 0.999842 |
| 204202_at   | IQ motif containing E                                                                                               | IQCE                        | 23288  | 2.265529 | 0.999842 |
| 209994_s_at | ATP-binding cassette, sub-family B (MDR/TAP), member 1 /// ATP-binding cassette, sub-family B (MDR/TAP)             | ABCB1 /// ABCB5243 /// 5244 |        | 2.264393 | 0.999842 |
| 201185_at   | HtrA serine peptidase 1                                                                                             | HTRA1                       | 5654   | 2.262879 | 0.999842 |
| 215640_at   | TBC1 domain family, member 2B                                                                                       | TBC1D2B                     | 23102  | 2.257998 | 0.999842 |
| 221834_at   | Seven in absentia homolog 1 (Drosophila)                                                                            | SIAH1                       | 6477   | 2.257215 | 0.999842 |
| 221478_at   | BCL2/adenovirus E1B 19kDa interacting protein 3-like                                                                | BNIP3L                      | 665    | 2.256252 | 0.999842 |
| 212237_at   | additional sex combs like 1 (Drosophila)                                                                            | ASXL1                       | 171023 | 2.254407 | 0.999842 |
| 222177_s_at | SCAN domain containing 2                                                                                            | SCAND2                      | 54581  | 2.253338 | 0.999842 |
| 219927_at   | FCF1 small subunit (SSU) processome component homolog (S. cerevisiae)                                               | FCF1                        | 51077  | 2.252937 | 0.999842 |
| 200738_s_at | phosphoglycerate kinase 1                                                                                           | PGK1                        | 5230   | 2.252717 | 0.999842 |
| 212309_at   | cytoplasmic linker associated protein 2                                                                             | CLASP2                      | 23122  | 2.25031  | 0.999842 |
| 220486_x_at | transmembrane protein 164                                                                                           | TMEM164                     | 84187  | 2.250191 | 0.999842 |
| 216497_at   | heterogeneous nuclear ribonucleoprotein A1 /// similar to Heterogeneous nuclear ribonucleoprotein A1 (Helix)        | hCG_2023776_120364 /// 14   |        | 2.247925 | 0.999842 |
| 221847_at   | Full-length cDNA clone CSODE005YD08 of Placenta of Homo sapiens (human)                                             | ---                         | ---    | 2.24739  | 0.999842 |
| 211927_x_at | eukaryotic translation elongation factor 1 gamma /// elongation factor 1 gamma pseudogene                           | EEF1G /// LOC1937 /// 7299  |        | 2.247272 | 0.999842 |
| 209686_at   | S100 calcium binding protein B                                                                                      | S100B                       | 6285   | 2.245669 | 0.999842 |
| 219343_at   | cell division cycle 37 homolog (S. cerevisiae)-like 1                                                               | CDC37L1                     | 55664  | 2.2454   | 0.999842 |
| 202930_s_at | succinate-CoA ligase, ADP-forming, beta subunit                                                                     | SUCLA2                      | 8803   | 2.236365 | 0.999842 |
| 222309_at   | Chromosome 6 open reading frame 62                                                                                  | C6orf62                     | 81688  | 2.233855 | 0.999842 |
| 206406_at   | sperm mitochondria-associated cysteine-rich protein                                                                 | SMCP                        | 4184   | 2.233241 | 0.999842 |
| 217682_at   | CDNA FLJ37032 fis. clone BRACE2011265                                                                               | ---                         | ---    | 2.227829 | 0.999842 |
| 212764_at   | ---                                                                                                                 | ---                         | ---    | 2.227796 | 0.999842 |
| 201324_at   | epithelial membrane protein 1                                                                                       | EMP1                        | 2012   | 2.227739 | 0.999842 |
| 207515_s_at | polymerase (RNA) I polypeptide C, 30kDa                                                                             | POLR1C                      | 9533   | 2.226737 | 0.999842 |
| 215707_s_at | prion protein (p27-30) (Creutzfeldt-Jakob disease, Gerstmann-Strausler-Scheinker syndrome, fatal familial insomnia) | PRNP                        | 5621   | 2.22629  | 0.999842 |
| 215512_at   | membrane-associated ring finger (C3HC4) 6                                                                           | 6-Mar                       | 10299  | 2.225775 | 0.999842 |
| 206592_s_at | adaptor-related protein complex 3, delta 1 subunit                                                                  | AP3D1                       | 8943   | 2.225278 | 0.999842 |
| 211720_x_at | ribosomal protein, large, P0                                                                                        | RPLP0                       | 6175   | 2.222868 | 0.999842 |
| 204566_at   | protein phosphatase 1D magnesium-dependent, delta isoform                                                           | PPM1D                       | 8493   | 2.221209 | 0.999842 |
| 222373_at   | ---                                                                                                                 | ---                         | ---    | 2.220988 | 0.999842 |
| 217591_at   | Transcribed locus                                                                                                   | ---                         | ---    | 2.219113 | 0.999842 |
| 216035_x_at | transcription factor 7-like 2 (T-cell specific, HMG-box)                                                            | TCF7L2                      | 6934   | 2.218585 | 0.999842 |
| 218296_x_at | misato homolog 1 (Drosophila) /// similar to misato                                                                 | LOC731059 /// 55154 /// 731 |        | 2.218276 | 0.999842 |
| 218923_at   | chitinase, di-N-acetyl-                                                                                             | CTBS                        | 1486   | 2.215965 | 0.999842 |
| 37005_at    | neuroblastoma, suppression of tumorigenicity 1                                                                      | NBL1                        | 4681   | 2.215959 | 0.999842 |
| 201528_at   | replication protein A1, 70kDa                                                                                       | RPA1                        | 6117   | 2.21572  | 0.999842 |
| 222311_s_at | splicing factor, arginine/serine-rich 15                                                                            | SFRS15                      | 57466  | 2.214884 | 0.999842 |

Supplementary Table 2: HIV-specific CD8 T cells Progressors vs. Controllers

|             |                                                                                                                |           |               |          |          |
|-------------|----------------------------------------------------------------------------------------------------------------|-----------|---------------|----------|----------|
| 202611_s_at | mediator complex subunit 14                                                                                    | MED14     | 9282          | 2.211491 | 0.999842 |
| 213612_x_at | neuroblastoma breakpoint family, member 15 /// neuroblastoma breakpoint family, member 10 /// neuroblas        | LOC728980 | 284565 /// 44 | 2.209781 | 0.999842 |
| 200099_s_at | ribosomal protein S3A /// similar to ribosomal protein S3a                                                     | LOC439992 | 439992 /// 61 | 2.209133 | 0.999842 |
| 218372_at   | mediator complex subunit 9                                                                                     | MED9      | 55090         | 2.208667 | 0.999842 |
| 210676_x_at | RANBP2-like and GRIP domain containing 5 /// RANBP2-like and GRIP domain containing 8 /// RANBP2-like a        | RGPD5     | 727851 /// 72 | 2.20714  | 0.999842 |
| 217607_x_at | eukaryotic translation initiation factor 4 gamma. 2                                                            | EIF4G2    | 1982          | 2.204431 | 0.999842 |
| 219543_at   | phenazine biosynthesis-like protein domain containing                                                          | PBLD      | 64081         | 2.204246 | 0.999842 |
| 200892_s_at | splicing factor, arginine/serine-rich 10 (transformer 2 homolog, Drosophila)                                   | SFRS10    | 6434          | 2.203327 | 0.999842 |
| 200668_s_at | ubiquitin-conjugating enzyme E2D 3 (UBC4/5 homolog, yeast)                                                     | UBE2D3    | 7323          | 2.201794 | 0.999842 |
| 221687_s_at | family with sequence similarity 125, member B                                                                  | FAM125B   | 89853         | 2.19819  | 0.999842 |
| 212391_x_at | ribosomal protein S3A                                                                                          | RPS3A     | 6189          | 2.197912 | 0.999842 |
| 213282_at   | CDNA FLJ39590 fis. clone SKNMC1000079                                                                          | ---       | ---           | 2.19722  | 0.999842 |
| 204023_at   | replication factor C (activator 1) 4, 37kDa                                                                    | RFC4      | 5984          | 2.196373 | 0.999842 |
| 218091_at   | HIV-1 Rev binding protein                                                                                      | HRB       | 3267          | 2.195946 | 0.999842 |
| 202981_x_at | seven in absentia homolog 1 (Drosophila)                                                                       | SIAH1     | 6477          | 2.195529 | 0.999842 |
| 204458_at   | lysophospholipase 3 (lysosomal phospholipase A2)                                                               | LYPLA3    | 23659         | 2.194908 | 0.999842 |
| 222035_s_at | poly(A) polymerase alpha                                                                                       | PAPOLA    | 10914         | 2.194582 | 0.999842 |
| 204593_s_at | Smith-Magenis syndrome chromosome region, candidate 7-like                                                     | SMCR7L    | 54471         | 2.192288 | 0.999842 |
| 209980_s_at | serine hydroxymethyltransferase 1 (soluble)                                                                    | SHMT1     | 6470          | 2.190352 | 0.999842 |
| 211973_at   | AF034176 Human mRNA (Tripodis and Ragoussis) Homo sapiens cDNA clone nton5 contig                              | ---       | ---           | 2.190082 | 0.999842 |
| 209406_at   | BCL2-associated athanogene 2                                                                                   | BAG2      | 9532          | 2.189011 | 0.999842 |
| 209024_s_at | synaptotagmin binding, cytoplasmic RNA interacting protein                                                     | SYNCRIP   | 10492         | 2.188887 | 0.999842 |
| 204642_at   | endothelial differentiation, sphingolipid G-protein-coupled receptor, 1                                        | EDG1      | 1901          | 2.18445  | 0.999842 |
| 202537_s_at | chromatin modifying protein 2B                                                                                 | CHMP2B    | 25978         | 2.182319 | 0.999842 |
| 213346_at   | chromosome 13 open reading frame 27                                                                            | C13orf27  | 93081         | 2.18125  | 0.999842 |
| 212684_at   | zinc finger protein 3                                                                                          | ZNF3      | 7551          | 2.180188 | 0.999842 |
| 217252_at   | sequestosome 1                                                                                                 | SQSTM1    | 8878          | 2.179627 | 0.999842 |
| 203466_at   | MpV17 mitochondrial inner membrane protein                                                                     | MPV17     | 4358          | 2.179359 | 0.999842 |
| 208275_x_at | undifferentiated embryonic cell transcription factor 1                                                         | UTF1      | 8433          | 2.179327 | 0.999842 |
| 212787_at   | YLP motif containing 1                                                                                         | YLPM1     | 56252         | 2.178219 | 0.999842 |
| 201033_x_at | ribosomal protein, large, P0                                                                                   | RPLP0     | 6175          | 2.178118 | 0.999842 |
| 216479_at   | ribosomal protein L21 /// similar to 60S ribosomal protein L21 /// similar to ribosomal protein L21 /// riboso | LOC387753 | 387753 /// 38 | 2.176185 | 0.999842 |
| 214553_s_at | cyclic AMP phosphoprotein, 19 kD                                                                               | ARPP-19   | 10776         | 2.174524 | 0.999842 |
| 212933_x_at | ribosomal protein L13                                                                                          | RPL13     | 6137          | 2.173498 | 0.999842 |
| 204142_at   | enolase superfamily member 1                                                                                   | ENOSF1    | 55556         | 2.1705   | 0.999842 |
| 215490_at   | chromosome 1 open reading frame 69                                                                             | C1orf69   | 200205        | 2.167572 | 0.999842 |
| 211202_s_at | jumonji, AT rich interactive domain 1B                                                                         | JARID1B   | 10765         | 2.166096 | 0.999842 |
| 217748_at   | adiponectin receptor 1                                                                                         | ADIPOR1   | 51094         | 2.166035 | 0.999842 |
| 201359_at   | coatamer protein complex, subunit beta 1                                                                       | COPB1     | 1315          | 2.165479 | 0.999842 |
| 200949_x_at | ribosomal protein S20                                                                                          | RPS20     | 6224          | 2.163448 | 0.999842 |
| 214785_at   | vacuolar protein sorting 13 homolog A (S. cerevisiae)                                                          | VPS13A    | 23230         | 2.158774 | 0.999842 |
| 213227_at   | progesterone receptor membrane component 2                                                                     | PGRM2     | 10424         | 2.158444 | 0.999842 |
| 208868_s_at | GABA(A) receptor-associated protein like 1                                                                     | GABARAPL1 | 23710         | 2.157821 | 0.999842 |
| 213172_at   | tetratricopeptide repeat domain 9                                                                              | TTC9      | 23508         | 2.155316 | 0.999842 |
| 202646_s_at | cold shock domain containing E1, RNA-binding                                                                   | CSDE1     | 7812          | 2.155085 | 0.999842 |
| 214305_s_at | splicing factor 3b, subunit 1, 155kDa                                                                          | SF3B1     | 23451         | 2.154989 | 0.999842 |
| 203847_s_at | A kinase (PRKA) anchor protein 8                                                                               | AKAP8     | 10270         | 2.154964 | 0.999842 |
| 211751_at   | phosphodiesterase 4D interacting protein (myomegalin)                                                          | PDE4DIP   | 9659          | 2.154377 | 0.999842 |
| 210426_x_at | RAR-related orphan receptor A                                                                                  | RORA      | 6095          | 2.153926 | 0.999842 |
| 215233_at   | jumonji domain containing 6                                                                                    | JMJD6     | 23210         | 2.151668 | 0.999842 |
| 201919_at   | solute carrier family 25, member 36                                                                            | SLC25A36  | 55186         | 2.151462 | 0.999842 |
| 221493_at   | TSPY-like 1                                                                                                    | TSPYL1    | 7259          | 2.15084  | 0.999842 |
| 208856_x_at | ribosomal protein, large, P0                                                                                   | RPLP0     | 6175          | 2.150626 | 0.999842 |
| 206559_x_at | eukaryotic translation elongation factor 1 alpha 1                                                             | EEF1A1    | 1915          | 2.150424 | 0.999842 |
| 204080_at   | target of EGR1, member 1 (nuclear)                                                                             | TOE1      | 114034        | 2.150146 | 0.999842 |
| 214245_at   | ribosomal protein S14                                                                                          | RPS14     | 6208          | 2.14823  | 0.999842 |
| 212101_at   | karyopherin alpha 6 (importin alpha 7)                                                                         | KPNA6     | 23633         | 2.145419 | 0.999842 |
| 221842_s_at | zinc finger protein 131                                                                                        | ZNF131    | 7690          | 2.145166 | 0.999842 |
| 217356_s_at | phosphoglycerate kinase 1                                                                                      | PGK1      | 5230          | 2.143442 | 0.999842 |
| 217807_s_at | glioma tumor suppressor candidate region gene 2                                                                | GLTSCR2   | 29997         | 2.143058 | 0.999842 |
| 209845_at   | makorin, ring finger protein, 1                                                                                | MKRN1     | 23608         | 2.142511 | 0.999842 |
| 204856_at   | UDP-GlcNAc:betaGal beta-1,3-N-acetylglucosaminyltransferase 3                                                  | B3GNT3    | 10331         | 2.138608 | 0.999842 |
| 212813_at   | junctional adhesion molecule 3                                                                                 | JAM3      | 83700         | 2.13849  | 0.999842 |
| 214834_at   | small nuclear ribonucleoprotein polypeptide N /// Prader-Willi/Angelman syndrome-5 /// small nucleolar RNA     | PAR-SN    | 338427 /// 34 | 2.137113 | 0.999842 |
| 206044_s_at | v-raf murine sarcoma viral oncogene homolog B1                                                                 | BRAF      | 673           | 2.135943 | 0.999842 |
| 200650_s_at | lactate dehydrogenase A                                                                                        | LDHA      | 3939          | 2.135006 | 0.999842 |
| 215528_at   | MRNA; cDNA DKFZp58601318 (from clone DKFZp58601318)                                                            | ---       | ---           | 2.132419 | 0.999842 |
| 221657_s_at | ankyrin repeat and SOCS box-containing 6                                                                       | ASB6      | 140459        | 2.130539 | 0.999842 |
| 214658_at   | transmembrane emp24 protein transport domain containing 7                                                      | TMED7     | 51014         | 2.128668 | 0.999842 |
| 218168_s_at | chaperone, ABC1 activity of bcl complex homolog (S. pombe)                                                     | CABC1     | 56997         | 2.128069 | 0.999842 |
| 217850_at   | guanine nucleotide binding protein-like 3 (nucleolar)                                                          | GNL3      | 26354         | 2.127825 | 0.999842 |
| 215575_at   | phosphodiesterase 4D interacting protein (myomegalin)                                                          | PDE4DIP   | 9659          | 2.12757  | 0.999842 |
| 218829_s_at | chromodomain helicase DNA binding protein 7                                                                    | CHD7      | 55636         | 2.126938 | 0.999842 |
| 214947_at   | CDNA FLJ43660 fis. clone SYN0V4004823                                                                          | ---       | ---           | 2.126398 | 0.999842 |
| 211439_at   | splicing factor, arginine/serine-rich 7, 35kDa                                                                 | SFRS7     | 6432          | 2.125496 | 0.999842 |
| 202730_s_at | programmed cell death 4 (neoplastic transformation inhibitor)                                                  | PDCD4     | 27250         | 2.124808 | 0.999842 |
| 218478_s_at | zinc finger, CCHC domain containing 8                                                                          | ZCCHC8    | 55596         | 2.124477 | 0.999842 |
| 216350_s_at | zinc finger protein 10                                                                                         | ZNF10     | 7556          | 2.122403 | 0.999842 |
| 213864_s_at | nucleosome assembly protein 1-like 1                                                                           | NAP1L1    | 4673          | 2.122277 | 0.999842 |
| 209412_at   | transmembrane protein 1                                                                                        | TMEM1     | 7109          | 2.121527 | 0.999842 |
| 219449_s_at | transmembrane protein 70                                                                                       | TMEM70    | 54968         | 2.121243 | 0.999842 |
| 210671_x_at | mitogen-activated protein kinase 8                                                                             | MAPK8     | 5599          | 2.117429 | 0.999842 |
| 202021_x_at | eukaryotic translation initiation factor 1                                                                     | EIF1      | 10209         | 2.117223 | 0.999842 |
| 204612_at   | protein kinase (cAMP-dependent, catalytic) inhibitor alpha                                                     | PKIA      | 5569          | 2.117206 | 0.999842 |
| 212655_at   | zinc finger, CCHC domain containing 14                                                                         | ZCCHC14   | 23174         | 2.116646 | 0.999842 |
| 212635_at   | transportin 1                                                                                                  | TNPO1     | 3842          | 2.115769 | 0.999842 |
| 219359_at   | ATH1, acid trehalase-like 1 (yeast)                                                                            | ATHL1     | 80162         | 2.114544 | 0.999842 |
| 209524_at   | hepatoma-derived growth factor, related protein 3                                                              | HDGFRP3   | 50810         | 2.114294 | 0.999842 |
| 209655_s_at | transmembrane protein 47                                                                                       | TMEM47    | 83604         | 2.114111 | 0.999842 |
| 211943_x_at | tumor protein, translationally-controlled 1                                                                    | TPT1      | 7178          | 2.113465 | 0.999842 |
| 200061_s_at | ribosomal protein S24                                                                                          | RPS24     | 6229          | 2.111251 | 0.999842 |
| 211598_x_at | vasoactive intestinal peptide receptor 2                                                                       | VIPR2     | 7434          | 2.110932 | 0.999842 |



Supplementary Table 2: HIV-specific CD8 T cells Progressors vs. Controllers

|             |                                                                                                                   |                             |        |          |          |
|-------------|-------------------------------------------------------------------------------------------------------------------|-----------------------------|--------|----------|----------|
| 218886_at   | PAK1 interacting protein 1                                                                                        | PAK1IP1                     | 55003  | 2.110751 | 0.999842 |
| 210178_x_at | FUS interacting protein (serine/arginine-rich) 1 /// similar to FUS-interacting serine-arginine-rich protein 1 (T | FUSIP1 /// LO 10772 /// 727 |        | 2.110265 | 0.999842 |
| 212392_s_at | phosphodiesterase 4D interacting protein (myomegalin) /// similar to phosphodiesterase 4D interacting prote       | LOC652526 /// 652526 /// 72 |        | 2.110079 | 0.999842 |
| 215509_s_at | BUB1 budding uninhibited by benzimidazoles 1 homolog (yeast)                                                      | BUB1                        | 699    | 2.108765 | 0.999842 |
| 210284_s_at | mitogen-activated protein kinase kinase kinase 7 interacting protein 2                                            | MAP3K7IP2                   | 23118  | 2.107827 | 0.999842 |
| 218852_at   | protein phosphatase 2 (formerly 2A), regulatory subunit B", gamma                                                 | PPP2R3C                     | 55012  | 2.10757  | 0.999842 |
| 204651_at   | nuclear respiratory factor 1                                                                                      | NRF1                        | 4899   | 2.107524 | 0.999842 |
| 211808_s_at | CREB binding protein (Rubinstein-Taybi syndrome)                                                                  | CREBBP                      | 1387   | 2.106633 | 0.999842 |
| 201328_at   | v-ets erythroblastosis virus E26 oncogene homolog 2 (avian)                                                       | ETS2                        | 2114   | 2.10658  | 0.999842 |
| 204817_at   | extra spindle pole bodies homolog 1 (S. cerevisiae)                                                               | ESPL1                       | 9700   | 2.106148 | 0.999842 |
| 216430_x_at | isovaleryl Coenzyme A dehydrogenase                                                                               | IVD                         | 3712   | 2.102387 | 0.999842 |
| 214280_x_at | heterogeneous nuclear ribonucleoprotein A1                                                                        | HNRNPA1                     | 3178   | 2.101729 | 0.999842 |
| 58367_s_at  | zinc finger protein 419                                                                                           | ZNF419                      | 79744  | 2.100589 | 0.999842 |
| 207016_s_at | aldehyde dehydrogenase 1 family, member A2                                                                        | ALDH1A2                     | 8854   | 2.098652 | 0.999842 |
| 217576_x_at | son of sevenless homolog 2 (Drosophila)                                                                           | SOS2                        | 6655   | 2.096924 | 0.999842 |
| 212515_s_at | DEAD (Asp-Glu-Ala-Asp) box polypeptide 3, X-linked                                                                | DDX3X                       | 1654   | 2.095366 | 0.999842 |
| 201548_s_at | jumonji, AT rich interactive domain 1B                                                                            | JARID1B                     | 10765  | 2.095061 | 0.999842 |
| 211913_s_at | c-mer proto-oncogene tyrosine kinase                                                                              | MERTK                       | 10461  | 2.093882 | 0.999842 |
| 209733_at   | hypothetical protein LOC286440                                                                                    | LOC286440                   | 286440 | 2.093813 | 0.999842 |
| 209841_s_at | leucine rich repeat neuronal 3                                                                                    | LRRN3                       | 54674  | 2.093564 | 0.999842 |
| 208184_s_at | transmembrane protein 1                                                                                           | TMEM1                       | 7109   | 2.093338 | 0.999842 |
| 208752_x_at | nucleosome assembly protein 1-like 1                                                                              | NAP1L1                      | 4673   | 2.093069 | 0.999842 |
| 209163_at   | cytochrome B-561                                                                                                  | CYB561                      | 1534   | 2.092255 | 0.999842 |
| 210047_at   | solute carrier family 11 (proton-coupled divalent metal ion transporters), member 2                               | SLC11A2                     | 4891   | 2.09167  | 0.999842 |
| 208044_s_at | peroxisome proliferator-activated receptor delta                                                                  | PPARD                       | 5467   | 2.091135 | 0.999842 |
| 219471_at   | chromosome 13 open reading frame 18                                                                               | C13orf18                    | 80183  | 2.091007 | 0.999842 |
| 208274_at   | oculomedin                                                                                                        | OCLM                        | 10896  | 2.090496 | 0.999842 |
| 208290_s_at | eukaryotic translation initiation factor 5                                                                        | EIF5                        | 1983   | 2.088403 | 0.999842 |
| 201210_at   | DEAD (Asp-Glu-Ala-Asp) box polypeptide 3, X-linked                                                                | DDX3X                       | 1654   | 2.088047 | 0.999842 |
| 208567_s_at | potassium inwardly-rectifying channel, subfamily J, member 12                                                     | KCNJ12                      | 3768   | 2.087219 | 0.999842 |
| 209838_at   | COP9 constitutive photomorphogenic homolog subunit 2 (Arabidopsis)                                                | COP2                        | 9318   | 2.086468 | 0.999842 |
| 209870_s_at | amyloid beta (A4) precursor protein-binding, family A, member 2 (X11-like)                                        | APBA2                       | 321    | 2.082192 | 0.999842 |
| 50277_at    | golgi associated, gamma adaptin ear containing, ARF binding protein 1                                             | GGA1                        | 26088  | 2.081811 | 0.999842 |
| 44146_at    | glucocorticoid modulatory element binding protein 2                                                               | GMEB2                       | 26205  | 2.080694 | 0.999842 |
| 218683_at   | polypyrimidine tract binding protein 2                                                                            | PTBP2                       | 58155  | 2.08031  | 0.999842 |
| 220346_at   | methylenetetrahydrofolate dehydrogenase (NADP+ dependent) 2-like                                                  | MTHFD2L                     | 441024 | 2.078247 | 0.999842 |
| 203375_s_at | tripeptidyl peptidase II                                                                                          | TPP2                        | 7174   | 2.077853 | 0.999842 |
| 216347_s_at | protein phosphatase 1, regulatory (inhibitor) subunit 13B                                                         | PPP1R13B                    | 23368  | 2.077437 | 0.999842 |
| 203636_at   | midline 1 (Opitz/BBB syndrome)                                                                                    | MID1                        | 4281   | 2.075067 | 0.999842 |
| 213019_at   | RAN binding protein 6                                                                                             | RANBP6                      | 26953  | 2.074864 | 0.999842 |
| 202352_s_at | proteasome (prosome, macropain) 26S subunit, non-ATPase, 12                                                       | PSMD12                      | 5718   | 2.074244 | 0.999842 |
| 217120_s_at | mediator complex subunit 14                                                                                       | MED14                       | 9282   | 2.074153 | 0.999842 |
| 214863_at   | Full length insert cDNA clone ZC35F11                                                                             | ---                         | ---    | 2.07363  | 0.999842 |
| 213763_at   | homeodomain interacting protein kinase 2                                                                          | HIPK2                       | 28996  | 2.073523 | 0.999842 |
| 210778_s_at | MAX dimerization protein 4                                                                                        | MXD4                        | 10608  | 2.071656 | 0.999842 |
| 221675_s_at | choline phosphotransferase 1                                                                                      | CHPT1                       | 56994  | 2.070737 | 0.999842 |
| 220576_at   | GPI deacylase                                                                                                     | PGAP1                       | 80055  | 2.065053 | 0.999842 |
| 207984_s_at | membrane protein, palmitoylated 2 (MAGUK p55 subfamily member 2)                                                  | MPP2                        | 4355   | 2.064386 | 0.999842 |
| 214354_x_at | surfactant, pulmonary-associated protein B                                                                        | SFTPB                       | 6439   | 2.063379 | 0.999842 |
| 221919_at   | heterogeneous nuclear ribonucleoprotein A1 /// hypothetical protein LOC728844                                     | HNRNPA1 /// 3178 /// 7288   |        | 2.062624 | 0.999842 |
| 210691_s_at | calyculin binding protein                                                                                         | CACYBP                      | 27101  | 2.062483 | 0.999842 |
| 216548_x_at | high-mobility group (nonhistone chromosomal) protein 4-like                                                       | HMG4L                       | 128872 | 2.062217 | 0.999842 |
| 219321_at   | membrane protein, palmitoylated 5 (MAGUK p55 subfamily member 5)                                                  | MPP5                        | 64398  | 2.062179 | 0.999842 |
| 219248_at   | THUMP domain containing 2                                                                                         | THUMPD2                     | 80745  | 2.061558 | 0.999842 |
| 205198_s_at | ATPase, Cu++ transporting, alpha polypeptide (Menkes syndrome) /// similar to ATPase, Cu++ transporting,          | ATP7A /// LOC 538 /// 64473 |        | 2.061512 | 0.999842 |
| 210429_at   | Rh blood group, D antigen                                                                                         | RHD                         | 6007   | 2.060246 | 0.999842 |
| 218856_at   | tumor necrosis factor receptor superfamily, member 21                                                             | TNFRSF21                    | 27242  | 2.058949 | 0.999842 |
| 217719_at   | eukaryotic translation initiation factor 3, subunit E interacting protein                                         | EIF3EIP                     | 51386  | 2.058583 | 0.999842 |
| 206095_s_at | FUS interacting protein (serine/arginine-rich) 1 /// similar to FUS-interacting serine-arginine-rich protein 1 (T | FUSIP1 /// LO 10772 /// 727 |        | 2.058476 | 0.999842 |
| 205981_s_at | inhibitor of growth family, member 2                                                                              | ING2                        | 3622   | 2.055621 | 0.999842 |
| 215734_at   | chromosome 19 open reading frame 36                                                                               | C19orf36                    | 113177 | 2.054489 | 0.999842 |
| 214449_s_at | ras homolog gene family, member Q                                                                                 | RHOQ                        | 23433  | 2.054307 | 0.999842 |
| 51176_at    | mediator complex subunit 27                                                                                       | MED27                       | 9442   | 2.052362 | 0.999842 |
| 208198_x_at | killer cell immunoglobulin-like receptor, two domains, short cytoplasmic tail, 1                                  | KIR2DS1                     | 3806   | 2.047843 | 0.999842 |
| 212805_at   | prune homolog 2 (Drosophila)                                                                                      | PRUNE2                      | 158471 | 2.047256 | 0.999842 |
| 217367_s_at | zinc fingers and homeoboxes 3                                                                                     | ZHX3                        | 23051  | 2.044521 | 0.999842 |
| 204621_s_at | nuclear receptor subfamily 4, group A, member 2                                                                   | NR4A2                       | 4929   | 2.044483 | 0.999842 |
| 219562_at   | RAB26, member RAS oncogene family                                                                                 | RAB26                       | 25837  | 2.042244 | 0.999842 |
| 215630_at   | CDNA FLJ14102 fis. clone MAMMA1000940                                                                             | ---                         | ---    | 2.041621 | 0.999842 |
| 200737_at   | phosphoglycerate kinase 1                                                                                         | PGK1                        | 5230   | 2.041303 | 0.999842 |
| 214008_at   | Twinfilin, actin-binding protein, homolog 1 (Drosophila)                                                          | TWF1                        | 5756   | 2.041221 | 0.999842 |
| 211345_x_at | eukaryotic translation elongation factor 1 gamma /// elongation factor 1 gamma pseudogene                         | EEF1G /// LOC 1937 /// 7299 |        | 2.041174 | 0.999842 |
| 213725_x_at | xylosyltransferase 1                                                                                              | XYLT1                       | 64131  | 2.038204 | 0.999842 |
| 216979_at   | nuclear receptor subfamily 4, group A, member 3                                                                   | NR4A3                       | 8013   | 2.037575 | 0.999842 |
| 208384_s_at | midline 2                                                                                                         | MID2                        | 11043  | 2.036539 | 0.999842 |
| 212558_at   | sprouty homolog 1, antagonist of FGF signaling (Drosophila)                                                       | SPRY1                       | 10252  | 2.035056 | 0.999842 |
| 203321_s_at | ADNP homeobox 2                                                                                                   | ADNP2                       | 22850  | 2.034107 | 0.999842 |
| 217655_at   | FXYP domain containing ion transport regulator 5                                                                  | FXYS5                       | 53827  | 2.029777 | 0.999842 |
| 89948_at    | chromosome 20 open reading frame 67                                                                               | C20orf67                    | 63935  | 2.027922 | 0.999842 |
| 212628_at   | protein kinase N2                                                                                                 | PKN2                        | 5586   | 2.027843 | 0.999842 |
| 219182_at   | hypothetical protein FLJ22167                                                                                     | FLJ22167                    | 79583  | 2.027446 | 0.999842 |
| 212176_at   | splicing factor, arginine/serine-rich 18                                                                          | SFRS18                      | 25957  | 2.027393 | 0.999842 |
| 205892_s_at | fatty acid binding protein 1, liver                                                                               | FABP1                       | 2168   | 2.027061 | 0.999842 |
| 208410_x_at | amelogenin (amelogenesis imperfecta 1, X-linked)                                                                  | AMELX                       | 265    | 2.025715 | 0.999842 |
| 46256_at    | splA/ryanodine receptor domain and SOCS box containing 3                                                          | SPSB3                       | 90864  | 2.023653 | 0.999842 |
| 222247_at   | putative X-linked retinopathy protein                                                                             | DXS542                      | 57825  | 2.023276 | 0.999842 |
| 211555_s_at | guanylate cyclase 1, soluble, beta 3                                                                              | GUCY1B3                     | 2983   | 2.021895 | 0.999842 |
| 213281_at   | Jun oncogene                                                                                                      | JUN                         | 3725   | 2.020379 | 0.999842 |
| 208051_s_at | poly(A) binding protein interacting protein 1                                                                     | PAIP1                       | 10605  | 2.020016 | 0.999842 |
| 207128_s_at | zinc finger protein 223                                                                                           | ZNF223                      | 7766   | 2.016375 | 0.999842 |
| 221971_x_at | centaurin, gamma-like family, member 2                                                                            | CTGLF2                      | 729092 | 2.012843 | 0.999842 |
| 218406_x_at | neuron derived neurotrophic factor                                                                                | NENF                        | 29937  | 2.012699 | 0.999842 |

Supplementary Table 2: HIV-specific CD8 T cells Progressors vs. Controllers

|             |                                                                                                                                             |           |               |           |          |
|-------------|---------------------------------------------------------------------------------------------------------------------------------------------|-----------|---------------|-----------|----------|
| 220212_s_at | thyroid adenoma associated                                                                                                                  | THADA     | 6392          | 2.010788  | 0.999842 |
| 214016_s_at | splicing factor proline/glutamine-rich (polypyrimidine tract binding protein associated)                                                    | SFPO      | 6421          | 2.009902  | 0.999842 |
| 212279_at   | transmembrane protein 97                                                                                                                    | TMEM97    | 27346         | 2.008972  | 0.999842 |
| 36711_at    | v-maf musculoaponeurotic fibrosarcoma oncogene homolog F (avian)                                                                            | MAFF      | 23764         | 2.008811  | 0.999842 |
| 213958_at   | CD6 molecule                                                                                                                                | CD6       | 923           | 2.00796   | 0.999842 |
| 215135_at   | aspartyl aminopeptidase                                                                                                                     | DNPEP     | 23549         | 2.007805  | 0.999842 |
| 210346_s_at | CDC-like kinase 4                                                                                                                           | CLK4      | 57396         | 2.00762   | 0.999842 |
| 211979_at   | G protein-coupled receptor 107                                                                                                              | GPR107    | 57720         | 2.004594  | 0.999842 |
| 212607_at   | v-akt murine thymoma viral oncogene homolog 3 (protein kinase B, gamma)                                                                     | AKT3      | 10000         | 2.00203   | 0.999842 |
| 203362_s_at | MAD2 mitotic arrest deficient-like 1 (yeast)                                                                                                | MAD2L1    | 4085          | 2.001594  | 0.999842 |
| 212017_at   | p20                                                                                                                                         | LOC130074 | 130074        | 2.001472  | 0.999842 |
| 206799_at   | secretoglobin, family 1D, member 2                                                                                                          | SCGB1D2   | 10647         | 2.000709  | 0.999842 |
| 208713_at   | heterogeneous nuclear ribonucleoprotein U-like 1                                                                                            | HNRPU1    | 11100         | 2.000289  | 0.999842 |
| 218739_at   | abhydrolase domain containing 5                                                                                                             | ABHD5     | 51099         | 2.000006  | 0.999842 |
| 201387_s_at | ubiquitin carboxyl-terminal esterase L1 (ubiquitin thiolesterase)                                                                           | UCHL1     | 7345          | -2.000432 | 0.999842 |
| 214123_s_at | chromosome 4 open reading frame 10                                                                                                          | C4orf10   | 317648        | -2.000534 | 0.999842 |
| 37424_at    | coiled-coil alpha-helical rod protein 1                                                                                                     | CCHCR1    | 54535         | -2.00116  | 0.999842 |
| 210427_x_at | annexin A2                                                                                                                                  | ANXA2     | 302           | -2.002025 | 0.999842 |
| 203311_s_at | ADP-ribosylation factor 6                                                                                                                   | ARF6      | 382           | -2.002828 | 0.999842 |
| 201572_x_at | dCMP deaminase                                                                                                                              | DCTD      | 1635          | -2.002974 | 0.999842 |
| 202307_s_at | transporter 1, ATP-binding cassette, sub-family B (MDR/TAP)                                                                                 | TAP1      | 6890          | -2.004624 | 0.999842 |
| 216004_s_at | PBX/knotted 1 homeobox 1                                                                                                                    | PKNOX1    | 5316          | -2.005241 | 0.999842 |
| 222139_at   | KIAA1466 gene                                                                                                                               | KIAA1466  | 57612         | -2.005652 | 0.999842 |
| 222180_at   | CDNA FLJ14122 fis. clone MAMMA1002033                                                                                                       | ---       | ---           | -2.006673 | 0.999842 |
| 203825_at   | bromodomain containing 3                                                                                                                    | BRD3      | 8019          | -2.008574 | 0.999842 |
| 206795_at   | coagulation factor II (thrombin) receptor-like 2                                                                                            | F2RL2     | 2151          | -2.011262 | 0.999842 |
| 201762_s_at | proteasome (prosome, macropain) activator subunit 2 (PA28 beta)                                                                             | PSME2     | 5721          | -2.012016 | 0.999842 |
| 216991_at   | zinc finger protein 224                                                                                                                     | ZNF224    | 7767          | -2.012839 | 0.999842 |
| 221771_s_at | M-phase phosphoprotein 8                                                                                                                    | MPHOSPH8  | 54737         | -2.012947 | 0.999842 |
| 204279_at   | proteasome (prosome, macropain) subunit, beta type, 9 (large multifunctional peptidase 2)                                                   | PSMB9     | 5698          | -2.013904 | 0.999842 |
| 202205_at   | vasodilator-stimulated phosphoprotein                                                                                                       | VASP      | 7408          | -2.014419 | 0.999842 |
| 222225_at   | 60S ribosomal pseudogene                                                                                                                    | FLJ45055  | 644128        | -2.014512 | 0.999842 |
| 215193_x_at | major histocompatibility complex, class II, DR beta 1 /// major histocompatibility complex, class II, DR beta                               | HLA-DRB1  | 3123 /// 3125 | -2.015716 | 0.999842 |
| 208678_at   | ATPase, H+ transporting, lysosomal 31kDa, V1 subunit E1                                                                                     | ATP6V1E1  | 529           | -2.01657  | 0.999842 |
| 201633_s_at | cytochrome b5 type B (outer mitochondrial membrane)                                                                                         | CYB5B     | 80777         | -2.0168   | 0.999842 |
| 205231_s_at | epilepsy, progressive myoclonus type 2A, Lafora disease (laforin)                                                                           | EPM2A     | 7957          | -2.016821 | 0.999842 |
| 203249_at   | enhancer of zeste homolog 1 (Drosophila)                                                                                                    | EZH1      | 2145          | -2.017039 | 0.999842 |
| 212047_s_at | ring finger protein 167                                                                                                                     | RNF167    | 26001         | -2.019783 | 0.999842 |
| 219450_at   | chromosome 4 open reading frame 19                                                                                                          | C4orf19   | 55286         | -2.02243  | 0.999842 |
| 212678_at   | neurofibromin 1 (neurofibromatosis, von Recklinghausen disease, Watson disease)                                                             | NF1       | 4763          | -2.022693 | 0.999842 |
| 207181_s_at | caspase 7, apoptosis-related cysteine peptidase                                                                                             | CASP7     | 840           | -2.024013 | 0.999842 |
| 208997_s_at | uncoupling protein 2 (mitochondrial, proton carrier)                                                                                        | UCP2      | 7351          | -2.025785 | 0.999842 |
| 201040_at   | guanine nucleotide binding protein (G protein), alpha inhibiting activity polypeptide 2                                                     | GNAI2     | 2771          | -2.026031 | 0.999842 |
| 219920_s_at | GDP-mannose pyrophosphorylase B                                                                                                             | GMPPB     | 29925         | -2.026423 | 0.999842 |
| 215746_at   | (clone B3B3E13) chromosome 4p16.3 DNA fragment                                                                                              | ---       | ---           | -2.027182 | 0.999842 |
| 201614_s_at | RuvB-like 1 (E. coli)                                                                                                                       | RUVBL1    | 8607          | -2.027701 | 0.999842 |
| 221080_s_at | DENN/MADD domain containing 1C                                                                                                              | DENND1C   | 79958         | -2.028539 | 0.999842 |
| 211644_x_at | immunoglobulin kappa constant /// netrin 2-like (chicken) /// immunoglobulin kappa locus                                                    | IGK@      | 3514 /// 4917 | -2.031678 | 0.999842 |
| 221936_x_at | Mitochondrial ribosomal protein L41                                                                                                         | MRPL41    | 64975         | -2.032229 | 0.999842 |
| 201863_at   | family with sequence similarity 32, member A                                                                                                | FAM32A    | 26017         | -2.032426 | 0.999842 |
| 201216_at   | endoplasmic reticulum protein 29                                                                                                            | ERP29     | 10961         | -2.032913 | 0.999842 |
| 218700_s_at | RAB7, member RAS oncogene family-like 1                                                                                                     | RAB7L1    | 8934          | -2.034548 | 0.999842 |
| 213062_at   | N-terminal asparagine amidase                                                                                                               | NTAN1     | 123803        | -2.034967 | 0.999842 |
| 210267_s_at | proteasome (prosome, macropain) 26S subunit, ATPase, 3                                                                                      | PSMC3     | 5702          | -2.034989 | 0.999842 |
| 220085_at   | helicase, lymphoid-specific                                                                                                                 | HELLS     | 3070          | -2.035038 | 0.999842 |
| 201127_s_at | ATP citrate lyase                                                                                                                           | ACLY      | 47            | -2.038535 | 0.999842 |
| 217381_s_at | T cell receptor gamma variable 5 /// hypothetical protein LOC648852                                                                         | LOC648852 | 648852 /// 69 | -2.038913 | 0.999842 |
| 202577_s_at | DEAD (Asp-Glu-Ala-As) box polypeptide 19A                                                                                                   | DDX19A    | 55308         | -2.04079  | 0.999842 |
| 207391_s_at | phosphatidylinositol-4-phosphate 5-kinase, type I, alpha                                                                                    | PIPSK1A   | 8394          | -2.041488 | 0.999842 |
| 214883_at   | thyroid hormone receptor, alpha (erythroblastic leukemia viral (v-erb-a) oncogene homolog, avian)                                           | THRA      | 7067          | -2.042525 | 0.999842 |
| 218734_at   | N-acetyltransferase 11                                                                                                                      | NAT11     | 79829         | -2.044525 | 0.999842 |
| 214377_s_at | chymotrypsin-like                                                                                                                           | CTRL      | 1506          | -2.045597 | 0.999842 |
| 221997_s_at | Mitochondrial ribosomal protein L52                                                                                                         | MRPL52    | 122704        | -2.046959 | 0.999842 |
| 206150_at   | CD27 molecule                                                                                                                               | CD27      | 939           | -2.051925 | 0.999842 |
| 202270_at   | guanylate binding protein 1, interferon-inducible, 67kDa                                                                                    | GBP1      | 2633          | -2.052094 | 0.999842 |
| 219031_s_at | nuclear import 7 homolog (S. cerevisiae)                                                                                                    | INP7      | 51388         | -2.053791 | 0.999842 |
| 205229_s_at | coagulation factor C homolog, cochl (Limulus polyphemus)                                                                                    | COCH      | 1690          | -2.053924 | 0.999842 |
| 208000_at   | GPI anchored molecule like protein                                                                                                          | GML       | 2765          | -2.054524 | 0.999842 |
| 215236_s_at | phosphatidylinositol binding clathrin assembly protein                                                                                      | PICALM    | 8301          | -2.05492  | 0.999842 |
| 202323_s_at | acyl-Coenzyme A binding domain containing 3                                                                                                 | ACBD3     | 64746         | -2.054985 | 0.999842 |
| 201308_s_at | septin 11                                                                                                                                   | 11-Sep    | 55752         | -2.055677 | 0.999842 |
| 212082_s_at | myosin, light chain 6, alkali, smooth muscle and non-muscle                                                                                 | MYL6      | 4637          | -2.055771 | 0.999842 |
| 219807_x_at | RAB4B, member RAS oncogene family                                                                                                           | RAB4B     | 53916         | -2.05898  | 0.999842 |
| 214342_at   | ataxin 7-like 1                                                                                                                             | ATXN7L1   | 222255        | -2.060414 | 0.999842 |
| 206441_s_at | COMM domain containing 4                                                                                                                    | COMMD4    | 54939         | -2.061628 | 0.999842 |
| 215071_s_at | histone cluster 1, H2ac                                                                                                                     | HIST1H2AC | 8334          | -2.061937 | 0.999842 |
| 213446_s_at | IQ motif containing GTPase activating protein 1                                                                                             | IQGAP1    | 8826          | -2.062222 | 0.999842 |
| 213280_at   | GTPase activating Rap/RanGAP domain-like 4                                                                                                  | GARNL4    | 23108         | -2.062227 | 0.999842 |
| 208816_x_at | annexin A2 pseudogene 2                                                                                                                     | ANXA2P2   | 304           | -2.065256 | 0.999842 |
| 209446_s_at | chromosome 7 open reading frame 44                                                                                                          | C7orf44   | 55744         | -2.066757 | 0.999842 |
| 211742_s_at | ecotropic viral integration site 2B                                                                                                         | EVI2B     | 2124          | -2.069932 | 0.999842 |
| 210972_x_at | T cell receptor alpha locus /// T cell receptor delta variable 2 /// T cell receptor alpha variable 20 /// T cell receptor gamma variable 2 | TRA@      | 28517 /// 286 | -2.071463 | 0.999842 |
| 203160_s_at | ring finger protein 8                                                                                                                       | RNF8      | 9025          | -2.073032 | 0.999842 |
| 218811_at   | ORAI calcium release-activated calcium modulator 2                                                                                          | ORAI2     | 80228         | -2.073336 | 0.999842 |
| 218774_at   | decapping enzyme, scavenger                                                                                                                 | DCPS      | 28960         | -2.073863 | 0.999842 |
| 211139_s_at | NGF1-A binding protein 1 (EGR1 binding protein 1)                                                                                           | NAB1      | 4664          | -2.074392 | 0.999842 |
| 215287_at   | ELISC-1                                                                                                                                     | ---       | ---           | -2.074413 | 0.999842 |
| 213521_at   | protein tyrosine phosphatase, non-receptor type 18 (brain-derived)                                                                          | PTPN18    | 26469         | -2.07455  | 0.999842 |
| 202269_x_at | guanylate binding protein 1, interferon-inducible, 67kDa                                                                                    | GBP1      | 2633          | -2.074827 | 0.999842 |
| 205572_at   | angiopoietin 2                                                                                                                              | ANGPT2    | 285           | -2.076672 | 0.999842 |
| 209685_s_at | protein kinase C, beta 1                                                                                                                    | PRKCB1    | 5579          | -2.077604 | 0.999842 |
| 203103_s_at | PRP19/PSO4 pre-mRNA processing factor 19 homolog (S. cerevisiae)                                                                            | PRPF19    | 27339         | -2.080886 | 0.999842 |

Supplementary Table 2: HIV-specific CD8 T cells Progressors vs. Controllers

|             |                                                                                                                                             |               |               |           |          |
|-------------|---------------------------------------------------------------------------------------------------------------------------------------------|---------------|---------------|-----------|----------|
| 200814_at   | proteasome (prosome, macropain) activator subunit 1 (PA28 alpha)                                                                            | PSME1         | 5720          | -2.081854 | 0.999842 |
| 200787_s_at | phosphoprotein enriched in astrocytes 15                                                                                                    | PEA15         | 8682          | -2.08508  | 0.999842 |
| 206306_at   | ryanodine receptor 3                                                                                                                        | RYP3          | 6263          | -2.088117 | 0.999842 |
| 213349_at   | transmembrane and coiled-coil domain family 1                                                                                               | TMCC1         | 23023         | -2.089437 | 0.999842 |
| 214995_s_at | apolipoprotein B mRNA editing enzyme, catalytic polypeptide-like 3G /// apolipoprotein B mRNA editing enzyme, catalytic polypeptide-like 3G | APOBEC3F ///  | 200316 /// 60 | -2.089937 | 0.999842 |
| 217126_at   | Kpni repeat mrna (cdna clone pcd-kpni-8). 3' end                                                                                            | ---           | ---           | -2.090014 | 0.999842 |
| 209424_s_at | alpha-methylacyl-CoA racemase                                                                                                               | AMACR         | 23600         | -2.090059 | 0.999842 |
| 213730_x_at | transcription factor 3 (E2A immunoglobulin enhancer binding factors E12/E47)                                                                | TCF3          | 6929          | -2.090391 | 0.999842 |
| 220124_at   | giant axonal neuropathy (gigaxonin)                                                                                                         | GAN           | 8139          | -2.093448 | 0.999842 |
| 214970_s_at | ST6 beta-galactosamide alpha-2,6-sialyltransferase 1                                                                                        | ST6GAL1       | 6480          | -2.095149 | 0.999842 |
| 219308_s_at | adenylate kinase 5                                                                                                                          | AK5           | 26289         | -2.095852 | 0.999842 |
| 212748_at   | megakaryoblastic leukemia (translocation) 1                                                                                                 | MKL1          | 57591         | -2.097535 | 0.999842 |
| 204160_s_at | ectonucleotide pyrophosphatase/phosphodiesterase 4 (putative function)                                                                      | ENPP4         | 22875         | -2.098283 | 0.999842 |
| 201735_s_at | chloride channel 3                                                                                                                          | CLCN3         | 1182          | -2.098285 | 0.999842 |
| 205114_s_at | chemokine (C-C motif) ligand 3 /// chemokine (C-C motif) ligand 3-like 1 /// chemokine (C-C motif) ligand 3                                 | CCL3 /// CCL3 | 414062 /// 63 | -2.098934 | 0.999842 |
| 207419_s_at | ras-related C3 botulinum toxin substrate 2 (rho family, small GTP binding protein Rac2)                                                     | RAC2          | 5880          | -2.102638 | 0.999842 |
| 214735_at   | phosphoinositide-binding protein PIP3-E                                                                                                     | PIP3-E        | 26034         | -2.102814 | 0.999842 |
| 57539_at    | zinc finger, CCH-type with G patch domain                                                                                                   | ZGPAT         | 84619         | -2.103581 | 0.999842 |
| 205703_at   | ---                                                                                                                                         | ---           | ---           | -2.106786 | 0.999842 |
| 204226_at   | staufen, RNA binding protein, homolog 2 (Drosophila)                                                                                        | STAU2         | 27067         | -2.10817  | 0.999842 |
| 205396_at   | SMAD family member 3                                                                                                                        | SMAD3         | 4088          | -2.108608 | 0.999842 |
| 207870_at   | A kinase (PRKA) anchor protein (yotiao) 9                                                                                                   | AKAP9         | 10142         | -2.109249 | 0.999842 |
| 212784_at   | capicua homolog (Drosophila)                                                                                                                | CIC           | 23152         | -2.109293 | 0.999842 |
| 220990_s_at | transmembrane protein 49 /// microRNA 21                                                                                                    | MIRN21 /// TM | 406991 /// 81 | -2.111163 | 0.999842 |
| 215541_s_at | diaphanous homolog 1 (Drosophila)                                                                                                           | DIAPH1        | 1729          | -2.111547 | 0.999842 |
| 218409_s_at | DnaJ (Hsp40) homolog, subfamily C, member 1                                                                                                 | DNAJC1        | 64215         | -2.111661 | 0.999842 |
| 216528_at   | MRNA; cDNA DKFZp564C163 (from clone DKFZp564C163)                                                                                           | ---           | ---           | -2.111825 | 0.999842 |
| 203595_s_at | interferon-induced protein with tetratricopeptide repeats 5                                                                                 | IFIT5         | 24138         | -2.11479  | 0.999842 |
| 210807_s_at | solute carrier family 16, member 7 (monocarboxylic acid transporter 2)                                                                      | SLC16A7       | 9194          | -2.115275 | 0.999842 |
| 201275_at   | farnesyl diphosphate synthase (farnesyl pyrophosphate synthetase, dimethylallyltransferase, geranyltransferase)                             | FDP5          | 2224          | -2.116677 | 0.999842 |
| 203227_s_at | tetraspanin 31                                                                                                                              | TSPAN31       | 6302          | -2.118554 | 0.999842 |
| 214137_at   | Protein tyrosine phosphatase, receptor type, J                                                                                              | PTPRJ         | 5795          | -2.118709 | 0.999842 |
| 211178_s_at | proline-serine-threonine phosphatase interacting protein 1                                                                                  | PSTPIP1       | 9051          | -2.11889  | 0.999842 |
| 221864_at   | ORAI calcium release-activated calcium modulator 3                                                                                          | ORAI3         | 93129         | -2.121945 | 0.999842 |
| 201021_s_at | destrin (actin depolymerizing factor)                                                                                                       | DSTN          | 11034         | -2.124301 | 0.999842 |
| 220947_s_at | TBC1 domain family, member 10B                                                                                                              | TBC1D10B      | 26000         | -2.125496 | 0.999842 |
| 206484_s_at | X-prolyl aminopeptidase (aminopeptidase P) 2, membrane-bound                                                                                | XPNP2         | 7512          | -2.125971 | 0.999842 |
| 221542_s_at | ER lipid raft associated 2                                                                                                                  | ERLIN2        | 11160         | -2.12849  | 0.999842 |
| 222217_s_at | solute carrier family 27 (fatty acid transporter), member 3                                                                                 | SLC27A3       | 11000         | -2.129071 | 0.999842 |
| 219994_at   | amyloid beta (A4) precursor protein-binding, family B, member 1 interacting protein                                                         | APBB1IP       | 54518         | -2.129079 | 0.999842 |
| 215379_x_at | immunoglobulin lambda locus /// immunoglobulin lambda variable 3-25 /// immunoglobulin lambda variable 3                                    | IGL@ /// IGL  | 28793 /// 288 | -2.129778 | 0.999842 |
| 209671_x_at | T cell receptor alpha locus /// T cell receptor alpha constant                                                                              | TRA@ /// TRA  | 28755 /// 695 | -2.129991 | 0.999842 |
| 208649_s_at | valosin-containing protein                                                                                                                  | VCP           | 7415          | -2.130846 | 0.999842 |
| 1405_i_at   | chemokine (C-C motif) ligand 5                                                                                                              | CCL5          | 6352          | -2.130885 | 0.999842 |
| 212116_at   | tripartite motif-containing 27                                                                                                              | TRIM27        | 5987          | -2.131953 | 0.999842 |
| 205426_s_at | huntingtin interacting protein 1                                                                                                            | HIP1          | 3092          | -2.132452 | 0.999842 |
| 212663_at   | FK506 binding protein 15, 133kDa                                                                                                            | FKBP15        | 23307         | -2.132801 | 0.999842 |
| 210812_at   | X-ray repair complementing defective repair in Chinese hamster cells 4                                                                      | XRCC4         | 7518          | -2.135329 | 0.999842 |
| 209825_s_at | uridine-cytidine kinase 2                                                                                                                   | UCK2          | 7371          | -2.135386 | 0.999842 |
| 214545_s_at | proline synthetase co-transcribed homolog (bacterial)                                                                                       | PROSC         | 11212         | -2.137106 | 0.999842 |
| 201756_at   | replication protein A2, 32kDa                                                                                                               | RPA2          | 6118          | -2.137819 | 0.999842 |
| 215843_s_at | tolloid-like 2                                                                                                                              | TLL2          | 7093          | -2.138123 | 0.999842 |
| 221744_at   | WD repeat domain 68                                                                                                                         | WDR68         | 10238         | -2.140478 | 0.999842 |
| 217770_at   | phosphatidylinositol glycan anchor biosynthesis, class T                                                                                    | PIGT          | 51604         | -2.140963 | 0.999842 |
| 35254_at    | TRAF-type zinc finger domain containing 1                                                                                                   | TRAFD1        | 10906         | -2.141184 | 0.999842 |
| 42361_g_at  | coiled-coil alpha-helical rod protein 1                                                                                                     | CCHCR1        | 54535         | -2.143308 | 0.999842 |
| 213589_s_at | UDP-GlcNAc:betaGal beta-1,3-N-acetylglucosaminyltransferase-like 1                                                                          | B3GNTL1       | 146712        | -2.143421 | 0.999842 |
| 209198_s_at | synaptotagmin XI                                                                                                                            | SYT11         | 23208         | -2.143766 | 0.999842 |
| 203515_s_at | phosphomevalonate kinase                                                                                                                    | PMVK          | 10654         | -2.14437  | 0.999842 |
| 47069_at    | proline rich 5 (renal)                                                                                                                      | PRR5          | 55615         | -2.145005 | 0.999842 |
| 201700_at   | cyclin D3                                                                                                                                   | CCND3         | 896           | -2.145947 | 0.999842 |
| 209762_x_at | SP110 nuclear body protein                                                                                                                  | SP110         | 3431          | -2.146903 | 0.999842 |
| 216835_s_at | docking protein 1, 62kDa (downstream of tyrosine kinase 1)                                                                                  | DKP1          | 1796          | -2.149075 | 0.999842 |
| 215121_x_at | immunoglobulin lambda locus /// immunoglobulin lambda variable 4-3 /// immunoglobulin lambda variable 3                                     | IGL@ /// IGLV | 28786 /// 287 | -2.149809 | 0.999842 |
| 205241_at   | SCO cytochrome oxidase deficient homolog 2 (yeast)                                                                                          | SCO2          | 9997          | -2.150315 | 0.999842 |
| 209482_at   | processing of precursor 7, ribonuclease P/MRP subunit (S. cerevisiae)                                                                       | POP7          | 10248         | -2.152565 | 0.999842 |
| 218270_at   | mitochondrial ribosomal protein L24                                                                                                         | MRPL24        | 79590         | -2.152597 | 0.999842 |
| 57163_at    | elongation of very long chain fatty acids (FEN1/Elo2, SUR4/Elo3, yeast)-like 1                                                              | ELOVL1        | 64834         | -2.153494 | 0.999842 |
| 219193_at   | WD repeat domain 70                                                                                                                         | WDR70         | 55100         | -2.154374 | 0.999842 |
| 219205_at   | serine racemase                                                                                                                             | SRR           | 63826         | -2.15459  | 0.999842 |
| 204882_at   | Rho GTPase activating protein 25                                                                                                            | ARHGAP25      | 9938          | -2.155266 | 0.999842 |
| 201954_at   | actin related protein 2/3 complex, subunit 1B, 41kDa /// similar to Actin-related protein 2/3 complex subunit 1B                            | ARPC1B /// LC | 10095 /// 653 | -2.155304 | 0.999842 |
| 209679_s_at | small trans-membrane and glycosylated protein                                                                                               | LOC57228      | 57228         | -2.15685  | 0.999842 |
| 78383_at    | Topoisomerase I binding, arginine/serine-rich                                                                                               | TOPORS        | 10210         | -2.158688 | 0.999842 |
| 202121_s_at | chromatin modifying protein 2A                                                                                                              | CHMP2A        | 27243         | -2.159458 | 0.999842 |
| 218913_s_at | GEM interacting protein                                                                                                                     | GMIP          | 51291         | -2.160334 | 0.999842 |
| 209155_s_at | 5'-nucleotidase, cytosolic II                                                                                                               | NT5C2         | 22978         | -2.170779 | 0.999842 |
| 214340_at   | arachidonate 12-lipoxygenase pseudogene 2                                                                                                   | ALOX12P2      | 245           | -2.172329 | 0.999842 |
| 213060_s_at | chitinase 3-like 2                                                                                                                          | CHI3L2        | 1117          | -2.175725 | 0.999842 |
| 213046_at   | poly(A) binding protein, nuclear 1                                                                                                          | PABPN1        | 8106          | -2.176327 | 0.999842 |
| 206066_s_at | RAD51 homolog C (S. cerevisiae)                                                                                                             | RAD51C        | 5889          | -2.178267 | 0.999842 |
| 200996_at   | ARP3 actin-related protein 3 homolog (yeast)                                                                                                | ACTR3         | 10096         | -2.181321 | 0.999842 |
| 201194_at   | selenoprotein W, 1                                                                                                                          | SEPW1         | 6415          | -2.181792 | 0.999842 |
| 210892_s_at | general transcription factor II, I                                                                                                          | GTF2I         | 2969          | -2.182621 | 0.999842 |
| 210568_s_at | RecQ protein-like (DNA helicase Q1-like)                                                                                                    | RECQL         | 5965          | -2.191442 | 0.999842 |
| 219003_s_at | mannosidase, endo-alpha                                                                                                                     | MANEA         | 79694         | -2.192031 | 0.999842 |
| 209514_s_at | RAB27A, member RAS oncogene family                                                                                                          | RAB27A        | 5873          | -2.192759 | 0.999842 |
| 217962_at   | nucleolar protein family A, member 3 (H/ACA small nucleolar RNPs)                                                                           | NOLA3         | 55505         | -2.193999 | 0.999842 |
| 217776_at   | retinol dehydrogenase 11 (all-trans/9-cis/11-cis)                                                                                           | RDH11         | 51109         | -2.197094 | 0.999842 |
| 203226_s_at | tetraspanin 31                                                                                                                              | TSPAN31       | 6302          | -2.198671 | 0.999842 |
| 219690_at   | transmembrane protein 149                                                                                                                   | TMEM149       | 79713         | -2.202343 | 0.999842 |
| 207416_s_at | nuclear factor of activated T-cells, cytoplasmic, calcineurin-dependent 3                                                                   | NFATC3        | 4775          | -2.204823 | 0.999842 |

Supplementary Table 2: HIV-specific CD8 T cells Progressors vs. Controllers

|             |                                                                                                                    |                             |        |           |          |
|-------------|--------------------------------------------------------------------------------------------------------------------|-----------------------------|--------|-----------|----------|
| 218504_at   | fumarylacetoacetate hydrolase domain containing 2A                                                                 | :FAHD2A                     | 51011  | -2.205066 | 0.999842 |
| 212252_at   | calcium/calmodulin-dependent protein kinase kinase 2, beta                                                         | :CAMKK2                     | 10645  | -2.206291 | 0.999842 |
| 210164_at   | granzyme B (granzyme 2, cytotoxic T-lymphocyte-associated serine esterase 1)                                       | :GZMB                       | 3002   | -2.212516 | 0.999842 |
| 203143_s_at | KIAA0040                                                                                                           | :KIAA0040                   | 9674   | -2.213193 | 0.999842 |
| 203405_at   | proteasome (prosome, macropain) assembly chaperone 1                                                               | :PSMG1                      | 8624   | -2.213451 | 0.999842 |
| 200982_s_at | annexin A6                                                                                                         | :ANXA6                      | 309    | -2.214011 | 0.999842 |
| 218163_at   | malignant T cell amplified sequence 1                                                                              | :MCTS1                      | 28985  | -2.214785 | 0.999842 |
| 202747_s_at | integral membrane protein 2A                                                                                       | :ITM2A                      | 9452   | -2.214827 | 0.999842 |
| 211804_s_at | cyclin-dependent kinase 2                                                                                          | :CDK2                       | 1017   | -2.21587  | 0.999842 |
| 221374_at   | fibroblast growth factor 16                                                                                        | :FGF16                      | 8823   | -2.217071 | 0.999842 |
| 221804_s_at | family with sequence similarity 45, member B /// family with sequence similarity 45, member A /// similar to       | :FAM45A /// F/404636 /// 55 |        | -2.217733 | 0.999842 |
| 209808_x_at | inhibitor of growth family, member 1                                                                               | :ING1                       | 3621   | -2.217818 | 0.999842 |
| 219549_s_at | reticulon 3                                                                                                        | :RTN3                       | 10313  | -2.218935 | 0.999842 |
| 213867_x_at | actin, beta                                                                                                        | :ACTB                       | 60     | -2.222052 | 0.999842 |
| 218520_at   | TANK-binding kinase 1                                                                                              | :TBK1                       | 29110  | -2.224399 | 0.999842 |
| 217508_s_at | chromosome 18 open reading frame 25                                                                                | :C18orf25                   | 147339 | -2.224458 | 0.999842 |
| 207057_at   | solute carrier family 16, member 7 (monocarboxylic acid transporter 2)                                             | :SLC16A7                    | 9194   | -2.227306 | 0.999842 |
| 215672_s_at | adenosylhomocysteinase 3                                                                                           | :KIAA0828                   | 23382  | -2.229487 | 0.999842 |
| 209503_s_at | proteasome (prosome, macropain) 26S subunit, ATPase, 5                                                             | :PSMC5                      | 5705   | -2.230395 | 0.999842 |
| 208972_s_at | ATP synthase, H+ transporting, mitochondrial F0 complex, subunit C1 (subunit 9)                                    | :ATP5G1                     | 516    | -2.232452 | 0.999842 |
| 200617_at   | KIAA0152                                                                                                           | :KIAA0152                   | 9761   | -2.234502 | 0.999842 |
| 217183_at   | low density lipoprotein receptor (familial hypercholesterolemia)                                                   | :LDLR                       | 3949   | -2.23891  | 0.999842 |
| 207622_s_at | ATP-binding cassette, sub-family F (GCN20), member 2                                                               | :ABCF2                      | 10061  | -2.238971 | 0.999842 |
| 213293_s_at | tripartite motif-containing 22                                                                                     | :TRIM22                     | 10346  | -2.244567 | 0.999842 |
| 207795_s_at | killer cell lectin-like receptor subfamily D, member 1                                                             | :KLRD1                      | 3824   | -2.245444 | 0.999842 |
| 222369_at   | N-acetyltransferase 11                                                                                             | :NAT11                      | 79829  | -2.246198 | 0.999842 |
| 217309_s_at | Down syndrome critical region gene 3                                                                               | :DSCR3                      | 10311  | -2.247293 | 0.999842 |
| 210951_x_at | RAB27A, member RAS oncogene family                                                                                 | :RAB27A                     | 5873   | -2.248046 | 0.999842 |
| 214293_at   | Septin 11                                                                                                          | 11-Sep                      | 55752  | -2.248806 | 0.999842 |
| 216980_s_at | sialophorin (leukosialin, CD43)                                                                                    | :SPN                        | 6693   | -2.252631 | 0.999842 |
| 208677_s_at | basigin (Ok blood group)                                                                                           | :BSG                        | 682    | -2.255795 | 0.999842 |
| 212811_x_at | solute carrier family 1 (glutamate/neutral amino acid transporter), member 4                                       | :SLC1A4                     | 6509   | -2.257732 | 0.999842 |
| 205484_at   | signaling threshold regulating transmembrane adaptor 1                                                             | :SIT1                       | 27240  | -2.260847 | 0.999842 |
| 218388_at   | 6-phosphogluconolactonase                                                                                          | :PGLS                       | 25796  | -2.262343 | 0.999842 |
| 211796_s_at | T cell receptor beta variable 19 /// T cell receptor beta variable 7-2 /// T cell receptor beta variable 5-4 /// T | :TRBC1 /// TR/28568 /// 285 |        | -2.262811 | 0.999842 |
| 200913_at   | protein phosphatase 1G (formerly 2C), magnesium-dependent, gamma isoform                                           | :PPM1G                      | 5496   | -2.264556 | 0.999842 |
| 215342_s_at | RAB GTPase activating protein 1-like                                                                               | :RABGAP1L                   | 9910   | -2.265079 | 0.999842 |
| 212025_s_at | flightless I homolog (Drosophila)                                                                                  | :FLII                       | 2314   | -2.265235 | 0.999842 |
| 213596_at   | caspase 4, apoptosis-related cysteine peptidase                                                                    | :CASP4                      | 837    | -2.266037 | 0.999842 |
| 204128_s_at | replication factor C (activator 1) 3, 38kDa                                                                        | :RFC3                       | 5983   | -2.268727 | 0.999842 |
| 203773_x_at | biliverdin reductase A                                                                                             | :BLVRA                      | 644    | -2.273153 | 0.999842 |
| 209389_x_at | diazepam binding inhibitor (GABA receptor modulator, acyl-Coenzyme A binding protein)                              | :DBI                        | 1622   | -2.274519 | 0.999842 |
| 90265_at    | centaurin, alpha 1                                                                                                 | :CENTA1                     | 11033  | -2.274589 | 0.999842 |
| 218397_at   | Fanconi anemia, complementation group L                                                                            | :FANCL                      | 55120  | -2.276529 | 0.999842 |
| 202546_at   | vesicle-associated membrane protein 8 (endobrevin)                                                                 | :VAMP8                      | 8673   | -2.278573 | 0.999842 |
| 218112_at   | mitochondrial ribosomal protein S34                                                                                | :MRPS34                     | 65993  | -2.285039 | 0.995336 |
| 202848_s_at | G protein-coupled receptor kinase 6                                                                                | :GRK6                       | 2870   | -2.285218 | 0.995336 |
| 213023_at   | utrophin                                                                                                           | :UTRN                       | 7402   | -2.285846 | 0.995336 |
| 209933_s_at | CD300a molecule                                                                                                    | :CD300A                     | 11314  | -2.286991 | 0.995336 |
| 202555_s_at | myosin, light chain kinase                                                                                         | :MYLK                       | 4638   | -2.287423 | 0.995336 |
| 214731_at   | CTTNBP2 N-terminal like                                                                                            | :CTTNBP2NL                  | 55917  | -2.2881   | 0.995336 |
| 202446_s_at | phospholipid scramblase 1                                                                                          | :PLSCR1                     | 5359   | -2.288756 | 0.995336 |
| 215209_at   | SEC24 related gene family, member D (S. cerevisiae)                                                                | :SEC24D                     | 9871   | -2.296886 | 0.994105 |
| 202339_at   | sympleskin                                                                                                         | :SYMPK                      | 8189   | -2.296936 | 0.994105 |
| 208965_s_at | interferon, gamma-inducible protein 16                                                                             | :IFI16                      | 3428   | -2.298739 | 0.993134 |
| 222065_s_at | flightless I homolog (Drosophila)                                                                                  | :FLII                       | 2314   | -2.298779 | 0.993134 |
| 209127_s_at | squamous cell carcinoma antigen recognized by T cells 3                                                            | :SART3                      | 9733   | -2.300519 | 0.993134 |
| 219821_s_at | glucose-fructose oxidoreductase domain containing 1                                                                | :GFOD1                      | 54438  | -2.302577 | 0.992432 |
| 216748_at   | pyrin and HIN domain family, member 1                                                                              | :PYHIN1                     | 149628 | -2.303495 | 0.992138 |
| 212517_at   | attractin                                                                                                          | :ATRNL                      | 8455   | -2.303933 | 0.992138 |
| 203243_s_at | PDZ and LIM domain 5                                                                                               | :PDLIM5                     | 10611  | -2.305576 | 0.992138 |
| 212136_at   | ATPase, Ca++ transporting, plasma membrane 4                                                                       | :ATP2B4                     | 493    | -2.307716 | 0.991589 |
| 204003_s_at | nucleoporin like 2                                                                                                 | :NUPL2                      | 11097  | -2.3096   | 0.991589 |
| 31826_at    | FK506 binding protein 15, 133kDa                                                                                   | :FKBP15                     | 23307  | -2.311638 | 0.990482 |
| 220603_s_at | multiple C2 domains, transmembrane 2                                                                               | :MCTP2                      | 55784  | -2.313553 | 0.990482 |
| 202645_s_at | multiple endocrine neoplasia 1                                                                                     | :MEN1                       | 4221   | -2.315952 | 0.990446 |
| 202430_s_at | phospholipid scramblase 1                                                                                          | :PLSCR1                     | 5359   | -2.316283 | 0.990446 |
| 210824_at   | ---                                                                                                                | ---                         | ---    | -2.317314 | 0.990446 |
| 205642_at   | centrosomal protein 110kDa                                                                                         | :CEP110                     | 11064  | -2.318111 | 0.990446 |
| 205599_at   | TNF receptor-associated factor 1                                                                                   | :TRAF1                      | 7185   | -2.318147 | 0.990446 |
| 221666_s_at | PYD and CARD domain containing                                                                                     | :PYCARD                     | 29108  | -2.321191 | 0.990446 |
| 211791_s_at | potassium voltage-gated channel, shaker-related subfamily, beta member 2                                           | :KCNAB2                     | 8514   | -2.326949 | 0.985797 |
| 218294_s_at | nucleoporin 50kDa                                                                                                  | :NUP50                      | 10762  | -2.327504 | 0.985797 |
| 213888_s_at | TRAF3 interacting protein 3                                                                                        | :TRAF3IP3                   | 80342  | -2.328011 | 0.985797 |
| 201823_s_at | ring finger protein 14                                                                                             | :RNF14                      | 9604   | -2.328307 | 0.985797 |
| 205345_at   | BRCA1 associated RING domain 1                                                                                     | :BARD1                      | 580    | -2.329218 | 0.985797 |
| 202358_s_at | sorting nexin 19                                                                                                   | :SNX19                      | 399979 | -2.33007  | 0.985797 |
| 209670_at   | T cell receptor alpha constant                                                                                     | :TRAC                       | 28755  | -2.330755 | 0.985797 |
| 208438_s_at | Gardner-Rasheed feline sarcoma viral (v-fgr) oncogene homolog                                                      | :FGR                        | 2268   | -2.330904 | 0.985797 |
| 204079_at   | tyrosylprotein sulfotransferase 2                                                                                  | :TPST2                      | 8459   | -2.333184 | 0.985797 |
| 203612_at   | bystin-like                                                                                                        | :BYSL                       | 705    | -2.333648 | 0.985797 |
| 206332_s_at | interferon, gamma-inducible protein 16                                                                             | :IFI16                      | 3428   | -2.334376 | 0.985797 |
| 207332_s_at | transferrin receptor (p90, CD71)                                                                                   | :TFRC                       | 7037   | -2.334941 | 0.985797 |
| 206486_at   | lymphocyte-activation gene 3                                                                                       | :LAG3                       | 3902   | -2.335934 | 0.985797 |
| 205272_s_at | proline-rich protein HaeIII subfamily 1 /// proline-rich protein HaeIII subfamily 2                                | :PRH1 /// PRH/5554 /// 5555 |        | -2.340475 | 0.985797 |
| 215176_x_at | Netrin 2-like (chicken)                                                                                            | :NTN2L                      | 4917   | -2.34512  | 0.983708 |
| 209196_at   | WD repeat domain 46                                                                                                | :WDR46                      | 9277   | -2.345284 | 0.983708 |
| 220096_at   | ribonuclease T2                                                                                                    | :RNASET2                    | 8635   | -2.345308 | 0.983708 |
| 217103_at   | low density lipoprotein receptor (familial hypercholesterolemia)                                                   | :LDLR                       | 3949   | -2.347621 | 0.983708 |
| 218507_at   | hypoxia-inducible protein 2                                                                                        | :HIG2                       | 29923  | -2.34774  | 0.983708 |
| 203030_s_at | protein tyrosine phosphatase, receptor type, N polypeptide 2                                                       | :PTPRN2                     | 5799   | -2.348458 | 0.983708 |
| 213603_s_at | ras-related C3 botulinum toxin substrate 2 (rho family, small GTP binding protein Rac2)                            | :RAC2                       | 5880   | -2.349372 | 0.983708 |

Supplementary Table 2: HIV-specific CD8 T cells Progressors vs. Controllers

|             |                                                                                                                     |               |               |           |          |
|-------------|---------------------------------------------------------------------------------------------------------------------|---------------|---------------|-----------|----------|
| 221669_s_at | acyl-Coenzyme A dehydrogenase family, member 8                                                                      | ACAD8         | 27034         | -2.350417 | 0.983708 |
| 217223_s_at | breakpoint cluster region                                                                                           | BCR           | 613           | -2.352349 | 0.983708 |
| 201230_s_at | ariadne homolog 2 (Drosophila)                                                                                      | ARIH2         | 10425         | -2.352848 | 0.983708 |
| 205126_at   | vaccinia related kinase 2                                                                                           | VRK2          | 7444          | -2.355216 | 0.983708 |
| 209553_at   | vacuolar protein sorting 8 homolog (S. cerevisiae)                                                                  | VPS8          | 23355         | -2.355407 | 0.983708 |
| 214096_s_at | serine hydroxymethyltransferase 2 (mitochondrial)                                                                   | SHMT2         | 6472          | -2.357866 | 0.983708 |
| 207629_s_at | rho/rac guanine nucleotide exchange factor (GEF) 2                                                                  | ARHGEF2       | 9181          | -2.36097  | 0.983057 |
| 215057_at   | Hypothetical protein FLJ44451                                                                                       | FLJ44451      | 100101122     | -2.363465 | 0.982963 |
| 210606_x_at | killer cell lectin-like receptor subfamily D, member 1                                                              | KLRD1         | 3824          | -2.364968 | 0.982963 |
| 202369_s_at | translocation associated membrane protein 2                                                                         | TRAM2         | 9697          | -2.365521 | 0.982963 |
| 219861_at   | DnaJ (Hsp40) homolog, subfamily C, member 17                                                                        | DNAJC17       | 55192         | -2.36604  | 0.982963 |
| 213418_at   | heat shock 70kDa protein 6 (HSP70B')                                                                                | HSPA6         | 3310          | -2.366397 | 0.982963 |
| 220558_x_at | tetraspanin 32                                                                                                      | TSPAN32       | 10077         | -2.367895 | 0.982963 |
| 204655_at   | chemokine (C-C motif) ligand 5                                                                                      | CCL5          | 6352          | -2.368428 | 0.982963 |
| 209473_at   | ectonucleoside triphosphate diphosphohydrolase 1                                                                    | ENTPD1        | 953           | -2.380552 | 0.975852 |
| 218670_at   | pseudouridylylase 1                                                                                                 | PUS1          | 80324         | -2.38687  | 0.969041 |
| 212863_x_at | C-terminal binding protein 1                                                                                        | CTBP1         | 1487          | -2.390791 | 0.968985 |
| 203729_at   | epithelial membrane protein 3                                                                                       | EMP3          | 2014          | -2.391383 | 0.968985 |
| 202330_s_at | uracil-DNA glycosylase                                                                                              | UNG           | 7374          | -2.392323 | 0.968985 |
| 213863_s_at | ornithine decarboxylase antizyme 3                                                                                  | OAZ3          | 51686         | -2.396142 | 0.968985 |
| 209890_at   | tetraspanin 5                                                                                                       | TSPAN5        | 10098         | -2.397432 | 0.968985 |
| 218783_at   | integrator complex subunit 7                                                                                        | INTS7         | 25896         | -2.399517 | 0.968985 |
| 212342_at   | Yip1 domain family, member 6                                                                                        | YIPF6         | 286451        | -2.401605 | 0.966636 |
| 214677_x_at | immunoglobulin lambda locus /// immunoglobulin lambda variable 4-3 /// immunoglobulin lambda variable 3             | IGL@ /// IGL  | 28786 /// 287 | -2.402143 | 0.966636 |
| 209734_at   | NCK-associated protein 1-like                                                                                       | NCKAP1L       | 3071          | -2.404151 | 0.965484 |
| 205449_at   | SAC3 domain containing 1                                                                                            | SAC3D1        | 29901         | -2.404316 | 0.965484 |
| 50374_at    | chromosome 17 open reading frame 90                                                                                 | C17orf90      | 339229        | -2.405973 | 0.965484 |
| 219846_at   | gon-4-like (C. elegans)                                                                                             | GON4L         | 54856         | -2.406746 | 0.965484 |
| 219843_at   | intracisternal A particle-promoted polypeptide                                                                      | IPP           | 3652          | -2.411438 | 0.965103 |
| 203252_at   | CDK2-associated protein 2                                                                                           | CDK2AP2       | 10263         | -2.413337 | 0.965103 |
| 201339_s_at | sterol carrier protein 2                                                                                            | SCP2          | 6342          | -2.414247 | 0.965103 |
| 209611_s_at | solute carrier family 1 (glutamate/neutral amino acid transporter), member 4                                        | SLC1A4        | 6509          | -2.414601 | 0.965103 |
| 218045_x_at | parathyromin                                                                                                        | PTMS          | 5763          | -2.420425 | 0.965103 |
| 36004_at    | inhibitor of kappa light polypeptide gene enhancer in B-cells, kinase gamma                                         | IKBKKG        | 8517          | -2.421728 | 0.965103 |
| 219519_s_at | sialic acid binding Ig-like lectin 1, sialoadhesin                                                                  | SIGLEC1       | 6614          | -2.42246  | 0.965103 |
| 204747_at   | interferon-induced protein with tetratricopeptide repeats 3                                                         | IFIT3         | 3437          | -2.422839 | 0.965103 |
| 213045_at   | microtubule associated serine/threonine kinase 3                                                                    | MAST3         | 23031         | -2.423957 | 0.965103 |
| 206558_at   | single-minded homolog 2 (Drosophila)                                                                                | SIM2          | 6493          | -2.425833 | 0.965103 |
| 209403_at   | TBC1 domain family, member 3 /// TBC1 domain family, member 3B /// TBC1 domain family, member 3C ///                | LOC653380 /// | 414059 /// 41 | -2.43324  | 0.957631 |
| 202101_s_at | v-ral simian leukemia viral oncogene homolog B (ras related; GTP binding protein)                                   | RALB          | 5899          | -2.434327 | 0.95725  |
| 203153_at   | interferon-induced protein with tetratricopeptide repeats 1                                                         | IFIT1         | 3434          | -2.437652 | 0.955994 |
| 217457_s_at | RAP1, GTP-GDP dissociation stimulator 1                                                                             | RAP1GDS1      | 5910          | -2.438018 | 0.955994 |
| 203401_at   | phosphoribosyl pyrophosphate synthetase 2                                                                           | PRPS2         | 5634          | -2.43916  | 0.955994 |
| 221797_at   | chromosome 17 open reading frame 90                                                                                 | C17orf90      | 339229        | -2.439745 | 0.955994 |
| 220073_s_at | pleckstrin homology domain containing, family G (with RhoGef domain) member 6                                       | PLEKHG6       | 55200         | -2.440486 | 0.955994 |
| 215409_at   | 1-acylglycerol-3-phosphate O-acyltransferase 7 (lysophosphatidic acid acyltransferase, eta)                         | AGPAT7        | 254531        | -2.440614 | 0.955994 |
| 205483_s_at | ISG15 ubiquitin-like modifier                                                                                       | ISG15         | 9636          | -2.44086  | 0.955994 |
| 217755_at   | hematological and neurological expressed 1                                                                          | HN1           | 51155         | -2.442135 | 0.955994 |
| 203016_s_at | synovial sarcoma, X breakpoint 2 interacting protein                                                                | SSX2IP        | 117178        | -2.44516  | 0.955994 |
| 57715_at    | family with sequence similarity 26, member B                                                                        | FAM26B        | 51063         | -2.452142 | 0.955994 |
| 202592_at   | biogenesis of lysosome-related organelles complex-1, subunit 1                                                      | BLOC1S1       | 2647          | -2.460968 | 0.945989 |
| 218543_s_at | poly (ADP-ribose) polymerase family, member 12                                                                      | PARP12        | 64761         | -2.461486 | 0.945989 |
| 203882_at   | interferon regulatory factor 9                                                                                      | IRF9          | 10379         | -2.463635 | 0.945989 |
| 202402_s_at | cysteinyI-tRNA synthetase                                                                                           | CARS          | 833           | -2.463806 | 0.945989 |
| 52159_at    | HemK methyltransferase family member 1                                                                              | HEMK1         | 51409         | -2.467389 | 0.945989 |
| 206687_s_at | protein tyrosine phosphatase, non-receptor type 6                                                                   | PTPN6         | 5777          | -2.467811 | 0.945989 |
| 208647_at   | farnesyl-diphosphate farnesyltransferase 1                                                                          | FDDT1         | 2222          | -2.46951  | 0.945989 |
| 205081_at   | cysteine-rich protein 1 (intestinal)                                                                                | CRIP1         | 1396          | -2.474319 | 0.945989 |
| 206513_at   | absent in melanoma 2                                                                                                | AIM2          | 9447          | -2.478787 | 0.945648 |
| 208659_at   | chloride intracellular channel 1                                                                                    | CLIC1         | 1192          | -2.479185 | 0.945648 |
| 200862_at   | 24-dehydrocholesterol reductase                                                                                     | DHCR24        | 1718          | -2.480873 | 0.94564  |
| 202748_at   | guanylate binding protein 2, interferon-inducible                                                                   | GBP2          | 2634          | -2.48152  | 0.94564  |
| 210007_s_at | glycerol-3-phosphate dehydrogenase 2 (mitochondrial)                                                                | GP2           | 2820          | -2.482177 | 0.94564  |
| 201848_s_at | BCL2/adenovirus E1B 19kDa interacting protein 3                                                                     | BNIP3         | 664           | -2.487797 | 0.94564  |
| 215999_at   | CMT1A duplicated region transcript 1                                                                                | CDRT1         | 374286        | -2.488423 | 0.94564  |
| 212804_s_at | GTPase activating protein and VPS9 domains 1                                                                        | GAPVD1        | 26130         | -2.489935 | 0.94564  |
| 204006_s_at | Fc fragment of IgG, low affinity IIIa, receptor (CD16a) /// Fc fragment of IgG, low affinity IIIb, receptor (CD16b) | FCGR3A /// FC | 2214 /// 2215 | -2.494078 | 0.94564  |
| 210140_at   | cystatin F (leukocystatin)                                                                                          | CST7          | 8530          | -2.498432 | 0.94564  |
| 220771_at   | melanoma antigen                                                                                                    | LOC51152      | 51152         | -2.500688 | 0.94564  |
| 210893_at   | ---                                                                                                                 | ---           | ---           | -2.507891 | 0.940768 |
| 213733_at   | myosin IF                                                                                                           | MYO1F         | 4542          | -2.509095 | 0.940768 |
| 204252_at   | cyclin-dependent kinase 2                                                                                           | CDK2          | 1017          | -2.509392 | 0.940768 |
| 209813_x_at | T cell receptor gamma constant 2 /// T cell receptor gamma variable 9 /// TCR gamma alternate reading frame         | TARP /// TRGC | 445347 /// 69 | -2.522398 | 0.934755 |
| 221876_at   | zinc finger protein 783                                                                                             | ZNF783        | 155060        | -2.522887 | 0.934755 |
| 37012_at    | capping protein (actin filament) muscle Z-line, beta                                                                | CAPZB         | 832           | -2.523261 | 0.934755 |
| 204398_s_at | echinoderm microtubule associated protein like 2                                                                    | EML2          | 24139         | -2.527401 | 0.934755 |
| 202145_at   | lymphocyte antigen 6 complex, locus E                                                                               | LY6E          | 4061          | -2.532151 | 0.932664 |
| 220586_at   | chromodomain helicase DNA binding protein 9                                                                         | CHD9          | 80205         | -2.540493 | 0.919927 |
| 216920_s_at | T cell receptor gamma constant 2 /// T cell receptor gamma variable 9 /// TCR gamma alternate reading frame         | TARP /// TRGC | 445347 /// 69 | -2.542233 | 0.919927 |
| 218197_s_at | oxidation resistance 1                                                                                              | OXR1          | 55074         | -2.543601 | 0.919927 |
| 206615_s_at | ADAM metallopeptidase domain 22                                                                                     | ADAM22        | 53616         | -2.545701 | 0.919927 |
| 215084_s_at | leucine rich repeat containing 42                                                                                   | LRRC42        | 115353        | -2.545709 | 0.919927 |
| 214657_s_at | Trophoblast-derived noncoding RNA                                                                                   | TncRNA        | 283131        | -2.546708 | 0.919927 |
| 215806_x_at | T cell receptor gamma constant 2 /// T cell receptor gamma variable 9 /// TCR gamma alternate reading frame         | TARP /// TRGC | 445347 /// 69 | -2.548486 | 0.919927 |
| 215713_at   | CDNA: FLJ23125 fis. clone LNG08217                                                                                  | ---           | ---           | -2.549053 | 0.919927 |
| 215797_at   | T cell receptor alpha variable 8-3                                                                                  | TRAV8-3       | 28683         | -2.55185  | 0.919927 |
| 209138_x_at | Immunoglobulin lambda locus                                                                                         | IGL@          | 3535          | -2.554937 | 0.919927 |
| 204959_at   | myeloid cell nuclear differentiation antigen                                                                        | MNDA          | 4332          | -2.559718 | 0.919927 |
| 214895_s_at | ADAM metallopeptidase domain 10                                                                                     | ADAM10        | 102           | -2.560982 | 0.919927 |
| 211786_at   | tumor necrosis factor receptor superfamily, member 9                                                                | TNFRSF9       | 3604          | -2.561003 | 0.919927 |
| 200800_s_at | heat shock 70kDa protein 1A /// heat shock 70kDa protein 1B                                                         | HSPA1A /// H  | 3303 /// 3304 | -2.567499 | 0.917727 |
| 213374_x_at | 3-hydroxyisobutyryl-Coenzyme A hydrolase                                                                            | HIBCH         | 26275         | -2.56778  | 0.917727 |

Supplementary Table 2: HIV-specific CD8 T cells Progressors vs. Controllers

|             |                                                                                                                                   |                     |               |           |          |
|-------------|-----------------------------------------------------------------------------------------------------------------------------------|---------------------|---------------|-----------|----------|
| 213915_at   | natural killer cell group 7 sequence                                                                                              | IKG7                | 4818          | -2.571943 | 0.913069 |
| 221514_at   | UTP14. U3 small nucleolar ribonucleoprotein, homolog A (yeast)                                                                    | UTP14A              | 10813         | -2.574838 | 0.913069 |
| 208670_s_at | EP300 interacting inhibitor of differentiation 1                                                                                  | EID1                | 23741         | -2.588208 | 0.892861 |
| 203169_at   | RGP1 retrograde golgi transport homolog (S. cerevisiae)                                                                           | RGP1                | 9827          | -2.58995  | 0.892861 |
| 215443_at   | thyroid stimulating hormone receptor                                                                                              | TSHR                | 7253          | -2.594297 | 0.890175 |
| 202837_at   | TRAF-type zinc finger domain containing 1                                                                                         | TRAFD1              | 10906         | -2.595966 | 0.890175 |
| 207667_s_at | mitogen-activated protein kinase kinase 3                                                                                         | MAP2K3              | 5606          | -2.597547 | 0.890175 |
| 215611_at   | transcription factor 12 (HTF4, helix-loop-helix transcription factors 4)                                                          | TCF12               | 6938          | -2.598297 | 0.890175 |
| 218335_x_at | TNFAIP3 interacting protein 2                                                                                                     | TNIP2               | 79155         | -2.60439  | 0.887011 |
| 204441_s_at | polymerase (DNA directed), alpha 2 (70kD subunit)                                                                                 | POLA2               | 23649         | -2.610632 | 0.881556 |
| 212099_at   | ras homolog gene family, member B                                                                                                 | RHOB                | 388           | -2.612423 | 0.880393 |
| 201233_at   | proteasome (prosome, macropain) 26S subunit, non-ATPase, 13                                                                       | PSMD13              | 5719          | -2.617423 | 0.874998 |
| 213507_s_at | karyopherin (importin) beta 1                                                                                                     | KPNB1               | 3837          | -2.620521 | 0.873794 |
| 203814_s_at | NAD(P)H dehydrogenase, quinone 2                                                                                                  | NQO2                | 4835          | -2.623466 | 0.872958 |
| 201639_s_at | cleavage and polyadenylation specific factor 1, 160kDa                                                                            | CPSF1               | 29894         | -2.623673 | 0.872958 |
| 220788_s_at | ring finger protein 31                                                                                                            | RNF31               | 55072         | -2.631476 | 0.866649 |
| 200850_s_at | S-adenosylhomocysteine hydrolase-like 1                                                                                           | AHCYL1              | 10768         | -2.633959 | 0.866649 |
| 211070_x_at | diazepam binding inhibitor (GABA receptor modulator, acyl-Coenzyme A binding protein)                                             | DBI                 | 1622          | -2.637035 | 0.862316 |
| 220449_at   | hypothetical protein MGC5566                                                                                                      | MGC5566             | 79015         | -2.638811 | 0.862215 |
| 218681_s_at | stromal cell-derived factor 2-like 1                                                                                              | SDF2L1              | 23753         | -2.642281 | 0.860415 |
| 211504_x_at | Rho-associated, coiled-coil containing protein kinase 2                                                                           | ROCK2               | 9475          | -2.644899 | 0.860415 |
| 221873_at   | zinc finger protein 143                                                                                                           | ZNF143              | 7702          | -2.645331 | 0.860415 |
| 217497_at   | endothelial cell growth factor 1 (platelet-derived)                                                                               | ECGF1               | 1890          | -2.653325 | 0.853874 |
| 202760_s_at | A kinase (PRKA) anchor protein 2 /// PALM2-AKAP2                                                                                  | AKAP2 /// PALM2     | 11217 /// 445 | -2.653912 | 0.853874 |
| 218593_at   | RNA binding motif protein 28                                                                                                      | RBM28               | 55131         | -2.656287 | 0.853874 |
| 201541_s_at | zinc finger, HIT type 1                                                                                                           | ZNFHIT1             | 10467         | -2.658826 | 0.853874 |
| 200812_at   | chaperonin containing TCP1, subunit 7 (eta)                                                                                       | CCT7                | 10574         | -2.661078 | 0.853874 |
| 217173_s_at | low density lipoprotein receptor (familial hypercholesterolemia)                                                                  | LDLR                | 3949          | -2.664139 | 0.853874 |
| 208097_s_at | thioredoxin domain containing 1                                                                                                   | TXNDC1              | 81542         | -2.664249 | 0.853874 |
| 204162_at   | NDC80 homolog, kinetochore complex component (S. cerevisiae)                                                                      | NDC80               | 10403         | -2.665556 | 0.853874 |
| 219159_s_at | SLAM family member 7                                                                                                              | SLAMF7              | 57823         | -2.66699  | 0.853874 |
| 217857_s_at | RNA binding motif protein 8A                                                                                                      | RBM8A               | 9939          | -2.667241 | 0.853874 |
| 202086_at   | myxovirus (influenza virus) resistance 1, interferon-inducible protein p78 (mouse)                                                | MX1                 | 4599          | -2.667578 | 0.853874 |
| 37425_g_at  | coiled-coil alpha-helical rod protein 1                                                                                           | COCHR1              | 54535         | -2.671183 | 0.853874 |
| 206589_at   | growth factor independent 1 transcription repressor                                                                               | GF1                 | 2672          | -2.675827 | 0.853874 |
| 203150_at   | Rab9 effector protein with kelch motifs                                                                                           | RABEPK              | 10244         | -2.67629  | 0.853874 |
| 221079_s_at | methyltransferase like 2B /// methyltransferase like 2A                                                                           | METTL2A /// METTL2B | 339175 /// 55 | -2.681647 | 0.853874 |
| 206092_x_at | regulator of telomere elongation helicase 1                                                                                       | RTEL1               | 51750         | -2.68586  | 0.853874 |
| 204661_at   | CD52 molecule                                                                                                                     | CD52                | 1043          | -2.687852 | 0.853874 |
| 217292_at   | myotubularin related protein 7                                                                                                    | MTMR7               | 9108          | -2.691707 | 0.853874 |
| 202869_at   | 2',5'-oligoadenylate synthetase 1, 40/46kDa                                                                                       | OAS1                | 4938          | -2.700101 | 0.853874 |
| 214004_s_at | vestigial like 4 (Drosophila)                                                                                                     | VGLL4               | 9686          | -2.708912 | 0.852106 |
| 214059_at   | Interferon-induced protein 44                                                                                                     | IFI44               | 10561         | -2.709346 | 0.852106 |
| 220307_at   | CD244 molecule, natural killer cell receptor 2B4                                                                                  | CD244               | 51744         | -2.711134 | 0.852106 |
| 212567_s_at | microtubule-associated protein 4                                                                                                  | MAP4                | 4134          | -2.713028 | 0.852106 |
| 201061_s_at | stomatin                                                                                                                          | STOM                | 2040          | -2.715958 | 0.852106 |
| 203931_s_at | mitochondrial ribosomal protein L12                                                                                               | MRPL12              | 6182          | -2.723132 | 0.852106 |
| 211144_x_at | T cell receptor gamma constant 2 /// T cell receptor gamma variable 9 /// TCR gamma alternate reading frame 1                     | TARP /// TRGC1      | 445347 /// 69 | -2.724738 | 0.852106 |
| 204340_at   | transmembrane protein 187                                                                                                         | TMEM187             | 8269          | -2.727179 | 0.852106 |
| 215105_at   | hypothetical gene CG030                                                                                                           | CG030               | 116828        | -2.731114 | 0.852106 |
| 202198_s_at | myotubularin related protein 3                                                                                                    | MTMR3               | 8897          | -2.734718 | 0.852106 |
| 214926_at   | spectrin, alpha, non-erythrocytic 1 (alpha-fodrin)                                                                                | SPTAN1              | 6709          | -2.748293 | 0.848523 |
| 201580_s_at | thioredoxin domain containing 13                                                                                                  | TXNDC13             | 56255         | -2.749566 | 0.848523 |
| 202411_at   | interferon, alpha-inducible protein 27                                                                                            | IFI27               | 3429          | -2.752903 | 0.846362 |
| 216298_at   | hypothetical protein LOC648852                                                                                                    | LOC648852           | 648852        | -2.755525 | 0.844341 |
| 33850_at    | microtubule-associated protein 4                                                                                                  | MAP4                | 4134          | -2.758097 | 0.843005 |
| 203109_at   | ubiquitin-conjugating enzyme E2M (UBC12 homolog, yeast)                                                                           | UBE2M               | 9040          | -2.765071 | 0.834774 |
| 204994_at   | myxovirus (influenza virus) resistance 2 (mouse)                                                                                  | MX2                 | 4600          | -2.772816 | 0.830816 |
| 218986_s_at | hypothetical protein FLJ20035                                                                                                     | FLJ20035            | 55601         | -2.779552 | 0.826033 |
| 200863_s_at | RAB11A, member RAS oncogene family                                                                                                | RAB11A              | 8766          | -2.785379 | 0.824301 |
| 222154_s_at | viral DNA polymerase-transactivated protein 6                                                                                     | LOC26010            | 26010         | -2.799965 | 0.813    |
| 213433_at   | ADP-ribosylation factor-like 3                                                                                                    | ARL3                | 403           | -2.80017  | 0.813    |
| 221708_s_at | unc-45 homolog A (C. elegans)                                                                                                     | UNC45A              | 55898         | -2.801569 | 0.813    |
| 200675_at   | CD81 molecule                                                                                                                     | CD81                | 975           | -2.802487 | 0.813    |
| 204073_s_at | chromosome 11 open reading frame 9                                                                                                | C11orf9             | 745           | -2.81372  | 0.813    |
| 32402_s_at  | sympleskin                                                                                                                        | SYMPK               | 8189          | -2.833536 | 0.782863 |
| 200623_s_at | calmodulin 3 (phosphorylase kinase, delta)                                                                                        | CALM3               | 808           | -2.839109 | 0.778228 |
| 201601_x_at | interferon induced transmembrane protein 1 (9-27)                                                                                 | IFITM1              | 8519          | -2.843273 | 0.777545 |
| 202428_x_at | diazepam binding inhibitor (GABA receptor modulator, acyl-Coenzyme A binding protein)                                             | DBI                 | 1622          | -2.846548 | 0.774818 |
| 205904_at   | MHC class I polypeptide-related sequence A                                                                                        | MICA                | 4276          | -2.862126 | 0.763884 |
| 214836_x_at | immunoglobulin kappa constant /// immunoglobulin kappa variable 1-5                                                               | IGKC /// IGKV       | 28299 /// 351 | -2.863496 | 0.763884 |
| 44673_at    | sialic acid binding Ig-like lectin 1, sialoadhesin                                                                                | SIGLEC1             | 6614          | -2.864676 | 0.763884 |
| 220631_at   | O-sialoglycoprotein endopeptidase-like 1                                                                                          | OSGEP1              | 64172         | -2.865379 | 0.763884 |
| 218367_x_at | ubiquitin specific peptidase 21                                                                                                   | USP21               | 27005         | -2.866218 | 0.763884 |
| 218999_at   | transmembrane protein 140                                                                                                         | TMEM140             | 55281         | -2.868119 | 0.763884 |
| 216519_s_at | proline synthetase co-transcribed homolog (bacterial)                                                                             | PROSC               | 11212         | -2.884539 | 0.758815 |
| 202659_at   | proteasome (prosome, macropain) subunit, beta type, 10                                                                            | PSMB10              | 5699          | -2.894005 | 0.74575  |
| 215719_x_at | Fas (TNF receptor superfamily, member 6)                                                                                          | FAS                 | 355           | -2.894768 | 0.74575  |
| 219211_at   | ubiquitin specific peptidase 18                                                                                                   | USP18               | 11274         | -2.895115 | 0.74575  |
| 221513_s_at | UTP14. U3 small nucleolar ribonucleoprotein, homolog C (yeast) /// UTP14. U3 small nucleolar ribonucleoprotein, homolog A (yeast) | UTP14A /// UTP14C   | 10813 /// 972 | -2.896457 | 0.74575  |
| 206746_at   | beaded filament structural protein 1, filensin                                                                                    | BFS1                | 631           | -2.897094 | 0.74575  |
| 213294_at   | Full-length cDNA clone CS0DK002YF13 of HeLa cells Cot 25-normalized of Homo sapiens (human)                                       | ---                 | ---           | -2.8981   | 0.74575  |
| 34210_at    | CD52 molecule                                                                                                                     | CD52                | 1043          | -2.901647 | 0.74575  |
| 117_at      | heat shock 70kDa protein 6 (HSP70B')                                                                                              | HSPA6               | 3310          | -2.909103 | 0.74575  |
| 221143_at   | replication protein A4, 34kDa                                                                                                     | RPA4                | 29935         | -2.921265 | 0.744465 |
| 202604_x_at | ADAM metallopeptidase domain 10                                                                                                   | ADAM10              | 102           | -2.931555 | 0.730023 |
| 204853_at   | origin recognition complex, subunit 2-like (yeast)                                                                                | ORC2L               | 4999          | -2.934116 | 0.729414 |
| 214343_s_at | ataxin 7-like 1                                                                                                                   | ATXN7L1             | 222255        | -2.946185 | 0.719337 |
| 208492_at   | regulatory factor X-associated protein                                                                                            | RFXAP               | 5994          | -2.953293 | 0.710946 |
| 210321_at   | granzyme H (cathepsin G-like 2, protein h-CCPX)                                                                                   | GZMH                | 2999          | -2.964101 | 0.707388 |
| 212166_at   | exportin 7                                                                                                                        | XPO7                | 23039         | -2.96494  | 0.707388 |
| 200643_at   | high density lipoprotein binding protein (vagin)                                                                                  | HDLBP               | 3069          | -2.965827 | 0.707388 |

Supplementary Table 2: HIV-specific CD8 T cells Progressors vs. Controllers

|             |                                                                                                           |                            |        |           |          |
|-------------|-----------------------------------------------------------------------------------------------------------|----------------------------|--------|-----------|----------|
| 218620_s_at | HemK methyltransferase family member 1                                                                    | HEMK1                      | 51409  | -2.972887 | 0.707388 |
| 216197_at   | activating transcription factor 7 interacting protein                                                     | ATF7IP                     | 55729  | -2.976676 | 0.707388 |
| 216883_x_at | phosphodiesterase 6D, cGMP-specific, rod. delta                                                           | PDE6D                      | 5147   | -2.979193 | 0.707388 |
| 216540_at   | T cell receptor alpha locus                                                                               | TRA@                       | 6955   | -2.979247 | 0.707388 |
| 207761_s_at | methyltransferase like 7A                                                                                 | METTL7A                    | 25840  | -2.981419 | 0.707388 |
| 207492_at   | N-glycanase 1                                                                                             | NGLY1                      | 55768  | -2.987963 | 0.707388 |
| 217138_x_at | Immunoglobulin lambda locus                                                                               | IGL@                       | 3535   | -2.992135 | 0.707388 |
| 222002_at   | Chromosome 7 open reading frame 26                                                                        | C7orf26                    | 79034  | -2.995426 | 0.707388 |
| 201315_x_at | interferon induced transmembrane protein 2 (1-8D)                                                         | IFITM2                     | 10581  | -3.006596 | 0.707388 |
| 202942_at   | electron-transfer-flavoprotein, beta polypeptide                                                          | ETFB                       | 2109   | -3.021587 | 0.707388 |
| 208003_s_at | nuclear factor of activated T-cells 5, tonicity-responsive                                                | NFAT5                      | 10725  | -3.0318   | 0.704919 |
| 202480_s_at | death effector domain containing                                                                          | DEDD                       | 9191   | -3.040346 | 0.694092 |
| 213617_s_at | chromosome 18 open reading frame 10                                                                       | C18orf10                   | 25941  | -3.040592 | 0.694092 |
| 205702_at   | putative homeodomain transcription factor 1                                                               | PHTF1                      | 10745  | -3.041724 | 0.694092 |
| 207509_s_at | leukocyte-associated immunoglobulin-like receptor 2                                                       | LAIR2                      | 3904   | -3.045286 | 0.694092 |
| 210156_s_at | protein-L-isoaspartate (D-aspartate) O-methyltransferase                                                  | PCMT1                      | 5110   | -3.054953 | 0.688018 |
| 216565_x_at | interferon induced transmembrane protein pseudogene                                                       | LOC391020                  | 391020 | -3.058544 | 0.686712 |
| 209732_at   | C-type lectin domain family 2, member B                                                                   | CLEC2B                     | 9976   | -3.059706 | 0.686712 |
| 205552_s_at | 2'-5'-oligoadenylate synthetase 1, 40/46kDa                                                               | OAS1                       | 4938   | -3.083134 | 0.679372 |
| 209000_s_at | mannose-6-phosphate receptor (cation dependent)                                                           | M6PR                       | 4074   | -3.087961 | 0.6765   |
| 216958_s_at | isovaleryl Coenzyme A dehydrogenase                                                                       | IVD                        | 3712   | -3.095566 | 0.668264 |
| 203471_s_at | pleckstrin                                                                                                | PLEK                       | 5341   | -3.095829 | 0.668264 |
| 203392_s_at | C-terminal binding protein 1                                                                              | CTBP1                      | 1487   | -3.098844 | 0.668264 |
| 210137_s_at | dCMP deaminase                                                                                            | DCTD                       | 1635   | -3.118266 | 0.668264 |
| 216237_s_at | minichromosome maintenance complex component 5                                                            | MCM5                       | 4174   | -3.125737 | 0.668264 |
| 209044_x_at | splicing factor 3b, subunit 4, 49kDa                                                                      | SF3B4                      | 10262  | -3.133064 | 0.665781 |
| 205718_at   | integrin, beta 7                                                                                          | ITGB7                      | 3695   | -3.13477  | 0.665781 |
| 221879_at   | calmodulin-like 4                                                                                         | CALML4                     | 91860  | -3.16149  | 0.65785  |
| 200760_s_at | ADP-ribosylation-like factor 6 interacting protein 5                                                      | ARL6IP5                    | 10550  | -3.163834 | 0.65785  |
| 205842_s_at | Janus kinase 2 (a protein tyrosine kinase)                                                                | JAK2                       | 3717   | -3.188324 | 0.623484 |
| 212162_at   | kinase D-interacting substrate of 220 kDa                                                                 | KIDINS220                  | 57498  | -3.208084 | 0.602636 |
| 218272_at   | hypothetical protein FLJ20699                                                                             | FLJ20699                   | 55020  | -3.253421 | 0.572938 |
| 216252_x_at | Fas (TNF receptor superfamily, member 5)                                                                  | FAS                        | 355    | -3.258874 | 0.572938 |
| 212203_x_at | interferon induced transmembrane protein 3 (1-8U)                                                         | IFITM3                     | 10410  | -3.258878 | 0.572938 |
| 204103_at   | chemokine (C-C motif) ligand 4                                                                            | CCL4                       | 6351   | -3.275972 | 0.569778 |
| 218927_s_at | carbohydrate (chondroitin 4) sulfotransferase 12                                                          | CHST12                     | 55501  | -3.280979 | 0.569778 |
| 201263_at   | threonyl-tRNA synthetase                                                                                  | TARS                       | 6897   | -3.293493 | 0.562471 |
| 203941_at   | integrator complex subunit 9                                                                              | INTS9                      | 55756  | -3.306854 | 0.562181 |
| 206133_at   | XIAP associated factor-1                                                                                  | XAF1                       | 54739  | -3.326924 | 0.5527   |
| 209449_at   | LSM2 homolog, U6 small nuclear RNA associated (S. cerevisiae)                                             | LSM2                       | 57819  | -3.332443 | 0.551467 |
| 64408_s_at  | calmodulin-like 4                                                                                         | CALML4                     | 91860  | -3.35522  | 0.524274 |
| 209969_s_at | signal transducer and activator of transcription 1, 91kDa                                                 | STAT1                      | 6772   | -3.367198 | 0.524274 |
| 202305_s_at | fasciculation and elongation protein zeta 2 (zygin II)                                                    | FEZ2                       | 9637   | -3.378249 | 0.524274 |
| 215864_at   | CDNA: FLJ21424 fis. clone COL04157                                                                        | ---                        | ---    | -3.392941 | 0.524274 |
| 213403_at   | Clone 23908 mRNA sequence                                                                                 | ---                        | ---    | -3.395549 | 0.524274 |
| 212729_at   | discs, large homolog 3 (neuroendocrine-dlg, Drosophila)                                                   | DLG3                       | 1741   | -3.436891 | 0.524274 |
| 214195_at   | tripeptidyl peptidase 1                                                                                   | TPP1                       | 1200   | -3.45291  | 0.524274 |
| 221651_x_at | immunoglobulin kappa constant /// immunoglobulin kappa variable 1-5 /// immunoglobulin kappa variable 2-1 | IGK@ /// IGK@28299 /// 289 | 289    | -3.46206  | 0.521169 |
| 201886_at   | WD repeat domain 23                                                                                       | WDR23                      | 80344  | -3.479719 | 0.504724 |
| 201641_at   | bone marrow stromal cell antigen 2                                                                        | BST2                       | 684    | -3.484017 | 0.504724 |
| 203470_s_at | pleckstrin                                                                                                | PLEK                       | 5341   | -3.49573  | 0.500671 |
| 218400_at   | 2'-5'-oligoadenylate synthetase 3, 100kDa                                                                 | OAS3                       | 4940   | -3.529733 | 0.4723   |
| 206553_at   | 2'-5'-oligoadenylate synthetase 2, 69/71kDa                                                               | OAS2                       | 4939   | -3.547919 | 0.471311 |
| 213797_at   | radical S-adenosyl methionine domain containing 2                                                         | RSAD2                      | 91543  | -3.569007 | 0.458443 |
| 204415_at   | interferon, alpha-inducible protein 6                                                                     | IFI6                       | 2537   | -3.586851 | 0.445071 |
| 203790_s_at | heat-responsive protein 12                                                                                | HRSP12                     | 10247  | -3.615157 | 0.433373 |
| 205965_at   | basic leucine zipper transcription factor, ATF-like                                                       | BATF                       | 10538  | -3.630572 | 0.430313 |
| 215345_x_at | T cell receptor gamma variable 7                                                                          | TRGV7                      | 6981   | -3.640388 | 0.428654 |
| 208741_at   | Sin3A-associated protein, 18kDa                                                                           | SAP18                      | 10284  | -3.664203 | 0.421399 |
| 221671_x_at | immunoglobulin kappa constant /// immunoglobulin kappa variable 1-5 /// immunoglobulin kappa variable 2-1 | IGK@ /// IGK@28299 /// 289 | 289    | -3.703389 | 0.421399 |
| 202417_at   | kelch-like ECH-associated protein 1                                                                       | KEAP1                      | 9817   | -3.712357 | 0.421399 |
| 207229_at   | killer cell lectin-like receptor subfamily A, member 1                                                    | KLRA1                      | 10748  | -3.74285  | 0.421399 |
| 214669_x_at | immunoglobulin kappa locus                                                                                | IGK@                       | 50802  | -3.797643 | 0.421399 |
| 201484_at   | suppressor of Ty 4 homolog 1 (S. cerevisiae)                                                              | SUPT4H1                    | 6827   | -3.81015  | 0.421399 |
| 212070_at   | G protein-coupled receptor 56                                                                             | GPR56                      | 9289   | -3.915727 | 0.421399 |
| 201949_x_at | capping protein (actin filament) muscle Z-line, beta                                                      | CAPZB                      | 832    | -3.983587 | 0.421399 |
| 214617_at   | perforin 1 (pore forming protein)                                                                         | PRF1                       | 5551   | -3.994811 | 0.421399 |
| 204968_at   | chromosome 6 open reading frame 47                                                                        | C6orf47                    | 57827  | -4.054763 | 0.421399 |
| 202458_at   | protease, serine, 23                                                                                      | PRSS23                     | 11098  | -4.133224 | 0.421399 |
| 204439_at   | interferon-induced protein 44-like                                                                        | IFI44L                     | 10964  | -4.330995 | 0.358674 |
| 206582_s_at | G protein-coupled receptor 56                                                                             | GPR56                      | 9289   | -4.572991 | 0.253543 |
| 209417_s_at | interferon-induced protein 35                                                                             | IFI35                      | 3430   | -5.028481 | 0.080065 |
| 214453_s_at | interferon-induced protein 44                                                                             | IFI44                      | 10561  | -5.110811 | 0.080065 |

| pZC      | dZC   | Set                                                               | Collection  |
|----------|-------|-------------------------------------------------------------------|-------------|
| 0.000004 | -1    | Interferon-mediated_immunity                                      | ABI_Process |
| 0.005124 | -1    | MHCI-mediated_immunity                                            | ABI_Process |
| 0.007238 | -1    | Pyrimidine_metabolism                                             | ABI_Process |
| 0.005599 | -1    | Parkinson_disease                                                 | ABI_Pathway |
| 0.000948 | -0.96 | Cytoskeletal_regulation_by_Rho_GTPase                             | ABI_Pathway |
| 0.046254 | -0.91 | Cell_motility                                                     | ABI_Process |
| 0.003262 | -0.91 | Inflammation_mediated_by_chemokine_and_cytokine_signaling_pathway | ABI_Pathway |
| 0.001052 | -0.88 | Natural_killer_cell_mediated_immunity                             | ABI_Process |
| 0.027051 | -0.84 | Immunity_and_defense                                              | ABI_Process |
| 0.003106 | -0.8  | Cell_adhesion-mediated_signaling                                  | ABI_Process |
| 0.043577 | -0.63 | Calcium_mediated_signaling                                        | ABI_Process |
| 0.020896 | -0.58 | Nerve-nerve_synaptic_transmission                                 | ABI_Process |
| 0.039849 | -0.58 | Apoptosis_signaling_pathway                                       | ABI_Pathway |
| 0.027594 | -0.4  | Neuronal_activities                                               | ABI_Process |
| 0.012109 | -0.39 | Apoptosis                                                         | ABI_Process |
| 0.032994 | -0.34 | Other_polysaccharide_metabolism                                   | ABI_Process |
| 0.010968 | -0.28 | Olfaction                                                         | ABI_Process |
| 0.00612  | -0.09 | Cadherin_signaling_pathway                                        | ABI_Pathway |
| 0.002987 | -0.01 | Steroid_hormone_metabolism                                        | ABI_Process |

**Supplementary Table 3: Gene sets significantly increased in expression profiles of HIV-specific T cells from Progressors vs. Controllers.** ABI Pathway and Process gene sets were tested for enrichment in expression profiles of Gag-specific CD8 T cells from progressors compared to controllers. Genesets with significant enrichment values shown. pZC indicates the enrichment p-value, as computed by RenderCat (details in Methods); dZC indicates the direction of the enrichment: negative value indicate that the genes are lower-expressed in controllers (higher-expressed in progressors); set is the name of the set; collection is the gene set collection to which the set belongs.



| pZC      | dZC  | Set                                                                               | Collection  |
|----------|------|-----------------------------------------------------------------------------------|-------------|
| 0.000069 | 0.97 | Protein_biosynthesis                                                              | ABI_Process |
| 0.00025  | 0.91 | mRNA_splicing                                                                     | ABI_Process |
| 0.002554 | 0.92 | Protein_targeting_and_localization                                                | ABI_Process |
| 0.005124 | 1    | mRNA_polyadenylation                                                              | ABI_Process |
| 0.008909 | 0.11 | Regulation_of_vasoconstriction,_dilation                                          | ABI_Process |
| 0.011298 | 0.12 | Heterotrimeric_G-protein_signaling_pathway-Gi_alpha_and_Gs_alpha_mediated_pathway | ABI_Pathway |
| 0.011872 | 1    | mRNA_end-processing_and_stability                                                 | ABI_Process |
| 0.013505 | 0.3  | Synaptic_transmission                                                             | ABI_Process |
| 0.016145 | 0.79 | Steroid_metabolism                                                                | ABI_Process |
| 0.017479 | 0.87 | Insulin_IGF_pathway-mitogen_activated_protein_kinase_kinase_MAP_kinase_cascade    | ABI_Pathway |
| 0.029288 | 0.46 | Skeletal_development                                                              | ABI_Process |
| 0.029288 | 0.69 | Anterior_posterior_patterning                                                     | ABI_Process |
| 0.032345 | 1    | Circadian_clock_system                                                            | ABI_Pathway |
| 0.03644  | 0.9  | Signal_transduction                                                               | ABI_Process |
| 0.044012 | 0.28 | Alzheimer_disease-presenilin_pathway                                              | ABI_Pathway |

**Supplementary Table 4: Gene sets significantly increased in expression profiles of HIV-specific T cells from Controllers vs. Progressors.** ABI Pathway and Process gene sets were tested for enrichment in expression profiles of Gag-specific CD8 T cells from controllers compared to progressors. pZC indicates the enrichment p-value, as computed by RenderCat (details in Methods); dZC indicates the direction of the enrichment: positive values indicate that the genes are higher-expressed in elite controllers (lower-expressed in progressors); set is the name of the set; collection is the gene set collection to which the set belongs.

Supplementary Table 5: Jurakt cells stimulated with PD-1/CD3/CD28 vs. CD3/CD28

| Supplementary Table 5: Transcripts increased in expression in PD-1 Jurkat cells stimulated with PD1/CD3/CD28 beads (t > 2.0), or in those stimulated with CD3/CD28 beads (t < -2.0). |                                                                                                |                            |        |           |          |  |
|--------------------------------------------------------------------------------------------------------------------------------------------------------------------------------------|------------------------------------------------------------------------------------------------|----------------------------|--------|-----------|----------|--|
| probeset_id                                                                                                                                                                          | GeneTitle                                                                                      | GeneSymbol                 | GeneID | t         | q        |  |
| 210164_at                                                                                                                                                                            | granzyme B (granzyme 2, cytotoxic T-lymphocyte-associated serine esterase 1)                   | GZMB                       | 3002   | 18.227709 | 0.001874 |  |
| 209969_s_at                                                                                                                                                                          | signal transducer and activator of transcription 1, 91kDa                                      | STAT1                      | 6772   | 14.929347 | 0.00444  |  |
| 202269_x_at                                                                                                                                                                          | guanylate binding protein 1, interferon-inducible, 67kDa                                       | GBP1                       | 2633   | 10.838547 | 0.034349 |  |
| 205066_s_at                                                                                                                                                                          | ectonucleotide pyrophosphatase/phosphodiesterase 1                                             | ENPP1                      | 5167   | 10.210011 | 0.040357 |  |
| 200887_s_at                                                                                                                                                                          | signal transducer and activator of transcription 1, 91kDa                                      | STAT1                      | 6772   | 9.269462  | 0.066247 |  |
| 201105_at                                                                                                                                                                            | lectin, galactoside-binding, soluble, 1 (galectin 1)                                           | LGALS1                     | 3956   | 8.888005  | 0.075221 |  |
| 209417_s_at                                                                                                                                                                          | interferon-induced protein 35                                                                  | IFI35                      | 3430   | 8.664381  | 0.077699 |  |
| 205488_at                                                                                                                                                                            | granzyme A (granzyme 1, cytotoxic T-lymphocyte-associated serine esterase 3)                   | GZMA                       | 3001   | 8.343608  | 0.089478 |  |
| 202688_at                                                                                                                                                                            | tumor necrosis factor (ligand) superfamily, member 10                                          | TNFSF10                    | 8743   | 7.975849  | 0.105387 |  |
| 217997_at                                                                                                                                                                            | pleckstrin homology-like domain, family A, member 1                                            | PHLDA1                     | 22822  | 7.794043  | 0.106351 |  |
| 201649_at                                                                                                                                                                            | ubiquitin-conjugating enzyme E2L 6                                                             | UBE2L6                     | 9246   | 7.128327  | 0.183614 |  |
| 217996_at                                                                                                                                                                            | pleckstrin homology-like domain, family A, member 1                                            | PHLDA1                     | 22822  | 6.857691  | 0.222102 |  |
| 201666_at                                                                                                                                                                            | TIMP metalloproteinase inhibitor 1                                                             | TIMP1                      | 7076   | 6.69877   | 0.227814 |  |
| 204279_at                                                                                                                                                                            | proteasome (prosome, macropain) subunit, beta type, 9 (large multifunctional peptidase 2)      | PSMB9                      | 5698   | 6.66554   | 0.227814 |  |
| 207351_s_at                                                                                                                                                                          | SH2 domain protein 2A                                                                          | SH2D2A                     | 9047   | 6.547141  | 0.227814 |  |
| 202307_s_at                                                                                                                                                                          | transporter 1, ATP-binding cassette, sub-family B (MDR/TAP)                                    | TAP1                       | 6980   | 6.491677  | 0.227814 |  |
| 203939_at                                                                                                                                                                            | 5'-nucleotidase, ecto (CD73)                                                                   | NT5E                       | 4907   | 6.478622  | 0.227814 |  |
| 216231_s_at                                                                                                                                                                          | beta-2-microglobulin                                                                           | B2M                        | 567    | 6.466658  | 0.227814 |  |
| 200905_x_at                                                                                                                                                                          | major histocompatibility complex, class I, E                                                   | HLA-E                      | 3133   | 6.240698  | 0.263103 |  |
| 202659_at                                                                                                                                                                            | proteasome (prosome, macropain) subunit, beta type, 10                                         | PSMB10                     | 5699   | 6.238794  | 0.263103 |  |
| 203882_at                                                                                                                                                                            | interferon regulatory factor 9                                                                 | IRF9                       | 10379  | 6.143691  | 0.278594 |  |
| 202270_at                                                                                                                                                                            | guanylate binding protein 1, interferon-inducible, 67kDa                                       | GBP1                       | 2633   | 6.071515  | 0.288521 |  |
| 202531_at                                                                                                                                                                            | interferon regulatory factor 1                                                                 | IRF1                       | 3659   | 5.737293  | 0.368172 |  |
| 203695_s_at                                                                                                                                                                          | deafness, autosomal dominant 5                                                                 | DFNA5                      | 1687   | 5.725111  | 0.368172 |  |
| 204804_at                                                                                                                                                                            | tripartite motif-containing 21                                                                 | TRIM21                     | 6737   | 5.683695  | 0.368172 |  |
| 202975_s_at                                                                                                                                                                          | Rho-related BTB domain containing 3                                                            | RHOBTB3                    | 22836  | 5.643445  | 0.368172 |  |
| 206118_at                                                                                                                                                                            | signal transducer and activator of transcription 4                                             | STAT4                      | 6775   | 5.495037  | 0.368172 |  |
| 210140_at                                                                                                                                                                            | cystatin F (leukocystatin)                                                                     | CST7                       | 8530   | 5.487539  | 0.368172 |  |
| 210948_s_at                                                                                                                                                                          | lymphoid enhancer-binding factor 1                                                             | LEF1                       | 51176  | 5.451529  | 0.368172 |  |
| 201858_s_at                                                                                                                                                                          | serglycin                                                                                      | SRGN                       | 5552   | 5.449523  | 0.368172 |  |
| 203760_s_at                                                                                                                                                                          | Src-like-adaptor                                                                               | SLA                        | 6503   | 5.448234  | 0.368172 |  |
| 209670_at                                                                                                                                                                            | T cell receptor alpha constant                                                                 | TRAC                       | 28755  | 5.435559  | 0.368172 |  |
| 209365_s_at                                                                                                                                                                          | extracellular matrix protein 1                                                                 | ECM1                       | 1893   | 5.423926  | 0.368172 |  |
| 211005_at                                                                                                                                                                            | linker for activation of T cells                                                               | LAT                        | 27040  | 5.42136   | 0.368172 |  |
| 204070_at                                                                                                                                                                            | retinoic acid receptor responder (tazarotene induced) 3                                        | RARRES3                    | 5920   | 5.385485  | 0.374415 |  |
| 203729_at                                                                                                                                                                            | epithelial membrane protein 3                                                                  | EMP3                       | 2014   | 5.358671  | 0.376963 |  |
| 217456_x_at                                                                                                                                                                          | major histocompatibility complex, class I, E                                                   | HLA-E                      | 3133   | 5.324484  | 0.383186 |  |
| 204415_at                                                                                                                                                                            | interferon, alpha-inducible protein 6                                                          | IFI6                       | 2537   | 5.300603  | 0.384986 |  |
| 205065_at                                                                                                                                                                            | ectonucleotide pyrophosphatase/phosphodiesterase 1                                             | ENPP1                      | 5167   | 5.272298  | 0.389122 |  |
| 34210_s_at                                                                                                                                                                           | CD52 molecule                                                                                  | CD52                       | 1043   | 5.222255  | 0.395123 |  |
| 209667_at                                                                                                                                                                            | carboxylesterase 2 (intestine, liver)                                                          | CES2                       | 8824   | 5.133136  | 0.42509  |  |
| 209813_x_at                                                                                                                                                                          | T cell receptor gamma constant 2 /// T cell receptor gamma variable 9 /// TCR gamma alternate  | TARP /// TRGC445347 /// 69 |        | 5.127041  | 0.42509  |  |
| 208581_x_at                                                                                                                                                                          | metallothionein 1X                                                                             | MT1X                       | 4501   | 5.075682  | 0.443485 |  |
| 209040_s_at                                                                                                                                                                          | proteasome (prosome, macropain) subunit, beta type, 8 (large multifunctional peptidase 7)      | PSMB8                      | 5696   | 5.058703  | 0.443676 |  |
| 33304_at                                                                                                                                                                             | interferon stimulated exonuclease gene 20kDa                                                   | ISG20                      | 3669   | 4.959533  | 0.482434 |  |
| 221269_s_at                                                                                                                                                                          | SH3 domain binding glutamic acid-rich protein like 3                                           | SH3BGL3                    | 83442  | 4.920797  | 0.487407 |  |
| 213193_x_at                                                                                                                                                                          | T cell receptor beta variable 19 /// T cell receptor beta constant 1                           | TRBC1 /// TRE28568 /// 286 |        | 4.664671  | 0.623444 |  |
| 204637_at                                                                                                                                                                            | glycoprotein hormones, alpha polypeptide                                                       | CGA                        | 1081   | 4.647779  | 0.623444 |  |
| 208899_x_at                                                                                                                                                                          | ATPase, H+ transporting, lysosomal 34kDa, V1 subunit D                                         | ATP6V1D                    | 51382  | 4.61805   | 0.623444 |  |
| 205856_at                                                                                                                                                                            | solute carrier family 14 (urea transporter), member 1 (Kidd blood group)                       | SLC14A1                    | 6563   | 4.617547  | 0.623444 |  |
| 210397_at                                                                                                                                                                            | defensin, beta 1                                                                               | DEFB1                      | 1672   | 4.597083  | 0.623444 |  |
| 211165_x_at                                                                                                                                                                          | EPH receptor B2                                                                                | EPHB2                      | 2048   | 4.52819   | 0.643373 |  |
| 219716_at                                                                                                                                                                            | apolipoprotein L 6                                                                             | APOL6                      | 80830  | 4.483015  | 0.658014 |  |
| 213220_at                                                                                                                                                                            | hypothetical protein LOC92482                                                                  | LOC92482                   | 92482  | 4.474231  | 0.658014 |  |
| 204698_at                                                                                                                                                                            | interferon stimulated exonuclease gene 20kDa                                                   | ISG20                      | 3669   | 4.460427  | 0.659838 |  |
| 201762_s_at                                                                                                                                                                          | proteasome (prosome, macropain) activator subunit 2 (PA28 beta)                                | PSME2                      | 5721   | 4.448891  | 0.659838 |  |
| 204747_at                                                                                                                                                                            | interferon-induced protein with tetratricopeptide repeats 3                                    | IFIT3                      | 3437   | 4.400184  | 0.659838 |  |
| 209140_x_at                                                                                                                                                                          | major histocompatibility complex, class I, B                                                   | HLA-B                      | 3106   | 4.368345  | 0.659838 |  |
| 209732_at                                                                                                                                                                            | C-type lectin domain family 2, member B                                                        | CLEC2B                     | 9976   | 4.357969  | 0.659838 |  |
| 203761_at                                                                                                                                                                            | Src-like-adaptor                                                                               | SLA                        | 6503   | 4.336402  | 0.659838 |  |
| 200904_at                                                                                                                                                                            | major histocompatibility complex, class I, E                                                   | HLA-E                      | 3133   | 4.331984  | 0.659838 |  |
| 205406_s_at                                                                                                                                                                          | sperm autoantigenic protein 17                                                                 | SPA17                      | 53340  | 4.297531  | 0.659838 |  |
| 206584_at                                                                                                                                                                            | lymphocyte antigen 96                                                                          | LY96                       | 23643  | 4.269787  | 0.659838 |  |
| 219326_s_at                                                                                                                                                                          | UDP-GlcNAc:betaGal beta-1,3-N-acetylglucosaminyltransferase 2                                  | B3GNT2                     | 10678  | 4.249119  | 0.659838 |  |
| 205987_at                                                                                                                                                                            | CD1c molecule                                                                                  | CD1C                       | 911    | 4.226312  | 0.659838 |  |
| 200872_at                                                                                                                                                                            | S100 calcium binding protein A10                                                               | S100A10                    | 6281   | 4.224039  | 0.659838 |  |
| 203298_s_at                                                                                                                                                                          | jumonji, AT rich interactive domain 2                                                          | JARID2                     | 3720   | 4.219837  | 0.659838 |  |
| 210915_x_at                                                                                                                                                                          | T cell receptor beta variable 19 /// T cell receptor beta constant 1                           | TRBC1 /// TRE28568 /// 286 |        | 4.212395  | 0.659838 |  |
| 214757_at                                                                                                                                                                            | CDNA clone IMAGE:3456494                                                                       | ---                        | ---    | 4.204413  | 0.659838 |  |
| 202712_s_at                                                                                                                                                                          | creatine kinase, mitochondrial 1B /// creatine kinase, mitochondrial 1A                        | CKMT1A /// CI1159 /// 5485 |        | 4.160303  | 0.659838 |  |
| 207288_at                                                                                                                                                                            | chromosome X and Y open reading frame 2                                                        | CXYorf2                    | 80161  | 4.159694  | 0.659838 |  |
| 204661_at                                                                                                                                                                            | CD52 molecule                                                                                  | CD52                       | 1043   | 4.15591   | 0.659838 |  |
| 221139_s_at                                                                                                                                                                          | cysteine sulfonic acid decarboxylase                                                           | CSAD                       | 51380  | 4.128038  | 0.659838 |  |
| 202687_s_at                                                                                                                                                                          | tumor necrosis factor (ligand) superfamily, member 10                                          | TNFSF10                    | 8743   | 4.12724   | 0.659838 |  |
| 215806_x_at                                                                                                                                                                          | T cell receptor gamma constant 2 /// T cell receptor gamma variable 9 /// TCR gamma alternate  | TARP /// TRGC445347 /// 69 |        | 4.120661  | 0.659838 |  |
| 209515_s_at                                                                                                                                                                          | RAB27A, member RAS oncogene family                                                             | RAB27A                     | 5873   | 4.088021  | 0.659838 |  |
| 215082_at                                                                                                                                                                            | ELOVL family member 5, elongation of long chain fatty acids (FEN1/Elo2, SUR4/Elo3-like, yeast) | ELOVL5                     | 60481  | 4.074971  | 0.659838 |  |
| 219209_at                                                                                                                                                                            | interferon induced with helicase C domain 1                                                    | IFIH1                      | 64135  | 4.062895  | 0.659838 |  |
| 219717_at                                                                                                                                                                            | chromosome 4 open reading frame 30                                                             | C4orf30                    | 54876  | 4.06228   | 0.659838 |  |
| 212573_at                                                                                                                                                                            | endonuclease domain containing 1                                                               | ENDOD1                     | 23052  | 4.045748  | 0.659838 |  |
| 220021_at                                                                                                                                                                            | transmembrane channel-like 7                                                                   | TMC7                       | 79905  | 4.039762  | 0.659838 |  |
| 212570_at                                                                                                                                                                            | endonuclease domain containing 1                                                               | ENDOD1                     | 23052  | 4.031653  | 0.659838 |  |
| 216920_s_at                                                                                                                                                                          | T cell receptor gamma constant 2 /// T cell receptor gamma variable 9 /// TCR gamma alternate  | TARP /// TRGC445347 /// 69 |        | 4.028937  | 0.659838 |  |

Supplementary Table 5: Jurakt cells stimulated with PD-1/CD3/CD28 vs. CD3/CD28

|             |                                                                                                                          |                             |        |          |          |
|-------------|--------------------------------------------------------------------------------------------------------------------------|-----------------------------|--------|----------|----------|
| 205798_at   | interleukin 7 receptor                                                                                                   | IL7R                        | 3575   | 4.010822 | 0.659838 |
| 221419_s_at | ---                                                                                                                      | ---                         | ---    | 3.997943 | 0.659838 |
| 212998_x_at | major histocompatibility complex, class II, DQ beta 1                                                                    | HLA-DQB1                    | 3119   | 3.980246 | 0.659838 |
| 214717_at   | hypothetical protein DKFZp434H1419                                                                                       | DKFZp434H14                 | 150967 | 3.958514 | 0.659838 |
| 212249_at   | phosphoinositide-3-kinase, regulatory subunit 1 (p85 alpha)                                                              | PIK3R1                      | 5295   | 3.957294 | 0.659838 |
| 220704_at   | IKAROS family zinc finger 1 (Ikaros)                                                                                     | IKZF1                       | 10320  | 3.947866 | 0.659838 |
| 213060_s_at | chitinase 3-like 2                                                                                                       | CHI3L2                      | 1117   | 3.942297 | 0.659838 |
| 220358_at   | basic leucine zipper transcription factor, ATF-like 3                                                                    | BATF3                       | 55509  | 3.933133 | 0.659838 |
| 210946_at   | phosphatidic acid phosphatase type 2A                                                                                    | PPAP2A                      | 8611   | 3.929366 | 0.659838 |
| 209769_s_at | glycoprotein Ib (platelet), beta polypeptide                                                                             | GP1BB                       | 2812   | 3.90943  | 0.659838 |
| 211600_at   | ---                                                                                                                      | ---                         | ---    | 3.909174 | 0.659838 |
| 205768_s_at | solute carrier family 27 (fatty acid transporter), member 2                                                              | SLC27A2                     | 11001  | 3.907836 | 0.659838 |
| 202156_s_at | CUG triplet repeat, RNA binding protein 2                                                                                | CUGBP2                      | 10659  | 3.893065 | 0.659838 |
| 217773_s_at | NADH dehydrogenase (ubiquinone) 1 alpha subcomplex, 4, 9kDa                                                              | NDUFA4                      | 4697   | 3.872607 | 0.659838 |
| 211434_s_at | chemokine (C-C motif) receptor-like 2 /// similar to chemokine (C-C motif) receptor-like 2                               | CCRL2 /// LOC727811 /// 90  |        | 3.865089 | 0.659838 |
| 208965_s_at | interferon, gamma-inducible protein 16                                                                                   | IFI16                       | 3428   | 3.859984 | 0.659838 |
| 205891_at   | adenosine A2b receptor                                                                                                   | ADORA2B                     | 136    | 3.842007 | 0.659838 |
| 215537_x_at | dimethylarginine dimethylaminohydrolase 2                                                                                | DDAH2                       | 23564  | 3.83539  | 0.659838 |
| 201426_s_at | vimentin                                                                                                                 | VIM                         | 7431   | 3.830078 | 0.659838 |
| 219296_at   | zinc finger, DHHC-type containing 13                                                                                     | ZDHHC13                     | 54503  | 3.826049 | 0.659838 |
| 201564_s_at | fascin homolog 1, actin-bundling protein (Strongylocentrotus purpuratus)                                                 | FSCN1                       | 6624   | 3.802566 | 0.659838 |
| 200848_at   | S-adenosylhomocysteine hydrolase-like 1                                                                                  | AHCYL1                      | 10768  | 3.795461 | 0.659838 |
| 201329_s_at | v-ets erythroblastosis virus E26 oncogene homolog 2 (avian)                                                              | ETS2                        | 2114   | 3.775619 | 0.659838 |
| 212185_x_at | metallothionein 2A                                                                                                       | MT2A                        | 4502   | 3.772668 | 0.659838 |
| 215949_x_at | immunoglobulin heavy constant mu                                                                                         | IGHM                        | 3507   | 3.74507  | 0.659838 |
| 217065_at   | T cell receptor alpha locus                                                                                              | TRA@                        | 6955   | 3.742999 | 0.659838 |
| 202110_at   | cytochrome c oxidase subunit VIIb                                                                                        | COX7B                       | 1349   | 3.735991 | 0.659838 |
| 216538_at   | MRNA; cDNA DKFZp566C093 (from clone DKFZp566C093)                                                                        | ---                         | ---    | 3.718778 | 0.659838 |
| 206248_at   | protein kinase C, epsilon                                                                                                | PRKCE                       | 5581   | 3.704881 | 0.659838 |
| 205267_at   | POU class 2 associating factor 1                                                                                         | POU2AF1                     | 5450   | 3.70105  | 0.659838 |
| 207734_at   | lymphocyte transmembrane adaptor 1                                                                                       | LAX1                        | 54900  | 3.690583 | 0.659838 |
| 204138_s_at | myeloid zinc finger 1                                                                                                    | MZF1                        | 7593   | 3.684846 | 0.659838 |
| 218751_s_at | F-box and WD repeat domain containing 7                                                                                  | FBXW7                       | 55294  | 3.673787 | 0.659838 |
| 210279_at   | G protein-coupled receptor 18                                                                                            | GPR18                       | 2841   | 3.668422 | 0.659838 |
| 210951_x_at | RAB27A, member RAS oncogene family                                                                                       | RAB27A                      | 5873   | 3.667693 | 0.659838 |
| 221309_at   | RNA binding motif protein 17                                                                                             | RBM17                       | 84991  | 3.667668 | 0.659838 |
| 217622_at   | rhomboid domain containing 3                                                                                             | RHBDD3                      | 25807  | 3.646813 | 0.659838 |
| 204220_at   | glia maturation factor, gamma                                                                                            | GMFG                        | 9535   | 3.641916 | 0.659838 |
| 205173_x_at | CD58 molecule                                                                                                            | CD58                        | 965    | 3.638125 | 0.659838 |
| 218193_s_at | golgi transport 1 homolog B (S. cerevisiae)                                                                              | GOLT1B                      | 51026  | 3.62911  | 0.659838 |
| 213996_at   | yippee-like 1 (Drosophila)                                                                                               | YPEL1                       | 29799  | 3.621062 | 0.659838 |
| 208522_s_at | patched homolog 1 (Drosophila)                                                                                           | PTCH1                       | 5727   | 3.610641 | 0.659838 |
| 214459_x_at | major histocompatibility complex, class I, C                                                                             | HLA-C                       | 3107   | 3.609019 | 0.659838 |
| 217371_s_at | interleukin 15                                                                                                           | IL15                        | 3600   | 3.593537 | 0.659838 |
| 219600_s_at | transmembrane protein 50B                                                                                                | TMEM50B                     | 757    | 3.591194 | 0.659838 |
| 206458_s_at | wingless-type MMTV integration site family, member 2B                                                                    | WNT2B                       | 7482   | 3.579152 | 0.659838 |
| 202262_x_at | dimethylarginine dimethylaminohydrolase 2                                                                                | DDAH2                       | 23564  | 3.57425  | 0.659838 |
| 206824_at   | carboxylesterase 1 (monocyte/macrophage serine esterase 1) /// carboxylesterase 4-like                                   | CES1 /// CES4 1066 /// 5171 |        | 3.574053 | 0.659838 |
| 219070_s_at | motile sperm domain containing 3                                                                                         | MOSPD3                      | 64598  | 3.568675 | 0.659838 |
| 212956_at   | TBC1 domain family, member 9 (with GRAM domain)                                                                          | TBC1D9                      | 23158  | 3.565038 | 0.659838 |
| 205966_at   | TAF13 RNA polymerase II, TATA box binding protein (TBP)-associated factor, 18kDa                                         | TAF13                       | 6884   | 3.557187 | 0.659838 |
| 221927_s_at | abhydrolase domain containing 11                                                                                         | ABHD11                      | 83451  | 3.557071 | 0.659838 |
| 203763_at   | dynein, cytoplasmic 2, light intermediate chain 1                                                                        | DYNC2L1                     | 151626 | 3.549701 | 0.659838 |
| 209761_s_at | SP110 nuclear body protein                                                                                               | SP110                       | 3431   | 3.52679  | 0.659838 |
| 214244_s_at | ATPase, H+ transporting, lysosomal 9kDa, V0 subunit e1                                                                   | ATP6VOE1                    | 8992   | 3.518142 | 0.659838 |
| 207191_s_at | immunoglobulin superfamily containing leucine-rich repeat                                                                | ISLR                        | 3671   | 3.517028 | 0.659838 |
| 208791_at   | clusterin                                                                                                                | CLU                         | 1191   | 3.516989 | 0.659838 |
| 205992_s_at | interleukin 15                                                                                                           | IL15                        | 3600   | 3.516398 | 0.659838 |
| 218747_s_at | TAP binding protein-like                                                                                                 | TAPBPL                      | 55080  | 3.513271 | 0.659838 |
| 217993_s_at | methionine adenosyltransferase II, beta                                                                                  | MAT2B                       | 27430  | 3.512097 | 0.659838 |
| 221474_at   | myosin regulatory light chain MRLC2                                                                                      | MRLC2                       | 103910 | 3.510823 | 0.659838 |
| 203297_s_at | jumonji, AT rich interactive domain 2                                                                                    | JARID2                      | 3720   | 3.505619 | 0.659838 |
| 203002_at   | angiostatin like 2                                                                                                       | AMOTL2                      | 51421  | 3.488415 | 0.659838 |
| 207955_at   | chemokine (C-C motif) ligand 27                                                                                          | CCL27                       | 10850  | 3.484061 | 0.659838 |
| 204234_s_at | zinc finger protein 195                                                                                                  | ZNF195                      | 7748   | 3.479671 | 0.659838 |
| 203581_at   | RAB4A, member RAS oncogene family                                                                                        | RAB4A                       | 5867   | 3.453963 | 0.659838 |
| 214329_x_at | tumor necrosis factor (ligand) superfamily, member 10                                                                    | TNFSF10                     | 8743   | 3.448907 | 0.659838 |
| 220952_s_at | pleckstrin homology domain containing, family A member 5                                                                 | PLEKHA5                     | 54477  | 3.44818  | 0.659838 |
| 203233_at   | interleukin 4 receptor                                                                                                   | IL4R                        | 3566   | 3.431601 | 0.659838 |
| 222256_s_at | phospholipase A2, group IVB (cytosolic)                                                                                  | PLA2G4B                     | 8681   | 3.429655 | 0.659838 |
| 219201_s_at | twisted gastrulation homolog 1 (Drosophila)                                                                              | TWSG1                       | 57045  | 3.429153 | 0.659838 |
| 221838_at   | kelch-like 22 (Drosophila)                                                                                               | KLHL22                      | 84861  | 3.419488 | 0.659838 |
| 215669_at   | major histocompatibility complex, class II, DR beta 4                                                                    | HLA-DRB4                    | 3126   | 3.418962 | 0.659838 |
| 205731_s_at | nuclear receptor coactivator 2                                                                                           | NCOA2                       | 10499  | 3.417031 | 0.659838 |
| 204035_at   | secretogranin II (chromogranin C)                                                                                        | SCG2                        | 7857   | 3.416442 | 0.659838 |
| 202158_s_at | CUG triplet repeat, RNA binding protein 2                                                                                | CUGBP2                      | 10659  | 3.4148   | 0.659838 |
| 212419_at   | chromosome 10 open reading frame 56                                                                                      | C10orf56                    | 219654 | 3.404936 | 0.659838 |
| 204951_at   | ras homolog gene family, member H                                                                                        | RHOH                        | 399    | 3.399886 | 0.659838 |
| 217097_s_at | putative homeodomain transcription factor 2                                                                              | PHTF2                       | 57157  | 3.38868  | 0.659838 |
| 220092_s_at | anthrax toxin receptor 1                                                                                                 | ANTXR1                      | 84168  | 3.373963 | 0.659838 |
| 200968_s_at | peptidylprolyl isomerase B (cyclophilin B)                                                                               | PPIB                        | 5479   | 3.368793 | 0.659838 |
| 221968_s_at | Zinc finger protein 771                                                                                                  | ZNF771                      | 51333  | 3.361364 | 0.659838 |
| 221577_x_at | growth differentiation factor 15                                                                                         | GDF15                       | 9518   | 3.358331 | 0.659838 |
| 205750_at   | biphenyl hydrolase-like (serine hydrolase; breast epithelial mucin-associated antigen)                                   | BPHL                        | 670    | 3.357068 | 0.659838 |
| 215142_at   | chromosome X open reading frame 27                                                                                       | CXorf27                     | 25763  | 3.356985 | 0.659838 |
| 211996_s_at | KIAA0220-like protein /// hypothetical gene LOC283846 /// hypothetical protein LOC440345 /// r:DKFZp547E08 23117 /// 283 |                             |        | 3.355306 | 0.659838 |

Supplementary Table 5: Jurakt cells stimulated with PD-1/CD3/CD28 vs. CD3/CD28

|             |                                                                                                              |                               |        |          |          |
|-------------|--------------------------------------------------------------------------------------------------------------|-------------------------------|--------|----------|----------|
| 209349_at   | RAD50 homolog (S. cerevisiae)                                                                                | RAD50                         | 10111  | 3.352697 | 0.659838 |
| 208812_x_at | major histocompatibility complex, class I, C /// similar to major histocompatibility complex, class I, C     | HLA-C /// LOC 3107 /// 7320   |        | 3.352429 | 0.659838 |
| 204833_at   | ATG12 autophagy related 12 homolog (S. cerevisiae)                                                           | ATG12                         | 9140   | 3.349624 | 0.659838 |
| 211211_x_at | SH2 domain protein 1A, Duncan's disease (lymphoproliferative syndrome)                                       | SH2D1A                        | 4068   | 3.349475 | 0.659838 |
| 203140_at   | B-cell CLL/lymphoma 6 (zinc finger protein 51)                                                               | BCL6                          | 604    | 3.347008 | 0.659838 |
| 210325_at   | CD1a molecule                                                                                                | CD1A                          | 909    | 3.341012 | 0.659838 |
| 213303_x_at | zinc finger and BTB domain containing 7A                                                                     | ZBTB7A                        | 51341  | 3.338424 | 0.659838 |
| 202499_s_at | solute carrier family 2 (facilitated glucose transporter), member 3                                          | SLC2A3                        | 6515   | 3.337949 | 0.659838 |
| 213295_at   | cylindromatosis (turban tumor syndrome)                                                                      | CYLD                          | 1540   | 3.334121 | 0.659838 |
| 211025_x_at | cytochrome c oxidase subunit Vb                                                                              | COX5B                         | 1329   | 3.330707 | 0.659838 |
| 204030_s_at | schwannomin interacting protein 1                                                                            | SCHIP1                        | 29970  | 3.329693 | 0.659838 |
| 208305_at   | progesterone receptor                                                                                        | PGR                           | 5241   | 3.326261 | 0.659838 |
| 214303_x_at | mucin 5AC, oligomeric mucus/gel-forming                                                                      | MUC5AC                        | 4586   | 3.322572 | 0.659838 |
| 201470_at   | glutathione S-transferase omega 1                                                                            | GSTO1                         | 9446   | 3.321774 | 0.659838 |
| 216526_x_at | major histocompatibility complex, class I, C                                                                 | HLA-C                         | 3107   | 3.319907 | 0.659838 |
| 200760_s_at | ADP-ribosylation-like factor 6 interacting protein 5                                                         | ARL6IP5                       | 10550  | 3.319819 | 0.659838 |
| 221750_at   | 3-hydroxy-3-methylglutaryl-Coenzyme A synthase 1 (soluble)                                                   | HMGCS1                        | 3157   | 3.318456 | 0.659838 |
| 208729_x_at | major histocompatibility complex, class I, B                                                                 | HLA-B                         | 3106   | 3.31338  | 0.659838 |
| 215685_s_at | distal-less homeobox 2                                                                                       | DLX2                          | 1746   | 3.311145 | 0.659838 |
| 216986_s_at | interferon regulatory factor 4                                                                               | IRF4                          | 3662   | 3.310301 | 0.659838 |
| 209514_s_at | RAB27A, member RAS oncogene family                                                                           | RAB27A                        | 5873   | 3.284745 | 0.659838 |
| 205069_s_at | Rho GTPase activating protein 26                                                                             | ARHGAP26                      | 23092  | 3.280985 | 0.659838 |
| 51200_at    | chromosome 19 open reading frame 60                                                                          | C19orf60                      | 55049  | 3.280458 | 0.659838 |
| 209575_at   | interleukin 10 receptor, beta                                                                                | IL10RB                        | 3588   | 3.276532 | 0.659838 |
| 202996_at   | polymerase (DNA-directed), delta 4                                                                           | POLD4                         | 57804  | 3.274484 | 0.659838 |
| 209381_x_at | splicing factor 3a, subunit 2, 66kDa                                                                         | SF3A2                         | 8175   | 3.273434 | 0.659838 |
| 209463_s_at | TAF12 RNA polymerase II, TATA box binding protein (TBP)-associated factor, 20kDa                             | TAF12                         | 6883   | 3.273109 | 0.659838 |
| 209331_s_at | MYC associated factor X                                                                                      | MAX                           | 4149   | 3.272007 | 0.659838 |
| 205379_at   | carbonyl reductase 3                                                                                         | CBR3                          | 874    | 3.269499 | 0.659838 |
| 212451_at   | KIAA0256 gene product                                                                                        | KIAA0256                      | 9728   | 3.266836 | 0.659838 |
| 207742_s_at | nuclear receptor subfamily 6, group A, member 1                                                              | NR6A1                         | 2649   | 3.25911  | 0.659838 |
| 211856_x_at | CD28 molecule                                                                                                | CD28                          | 940    | 3.252538 | 0.659838 |
| 200814_at   | proteasome (prosome, macropain) activator subunit 1 (PA28 alpha)                                             | PSME1                         | 5720   | 3.242506 | 0.659838 |
| 212613_at   | butyrophilin, subfamily 3, member A2                                                                         | BTN3A2                        | 11118  | 3.241053 | 0.659838 |
| 217165_x_at | metallothionein 1F                                                                                           | MT1F                          | 4494   | 3.236414 | 0.659838 |
| 203842_s_at | microtubule-associated protein, RP/EB family, member 3                                                       | MAPRE3                        | 22924  | 3.230593 | 0.659838 |
| 217329_x_at | ---                                                                                                          | ---                           | ---    | 3.229426 | 0.659838 |
| 215313_x_at | major histocompatibility complex, class I, A                                                                 | HLA-A                         | 3105   | 3.228022 | 0.659838 |
| 217422_s_at | CD22 molecule                                                                                                | CD22                          | 933    | 3.225762 | 0.659838 |
| 211796_s_at | T cell receptor beta variable 19 /// T cell receptor beta variable 7-2 /// T cell receptor beta variable 7-2 | TRBC1 /// TRC 28568 /// 28568 |        | 3.22505  | 0.659838 |
| 216055_at   | platelet-derived growth factor beta polypeptide (simian sarcoma viral (v-sis) oncogene homolog)              | PDGFB                         | 5155   | 3.214513 | 0.659838 |
| 202709_at   | fibromodulin                                                                                                 | FMOD                          | 2331   | 3.211581 | 0.659838 |
| 202343_x_at | cytochrome c oxidase subunit Vb                                                                              | COX5B                         | 1329   | 3.211032 | 0.659838 |
| 212509_s_at | matrix-remodelling associated 7                                                                              | MXRA7                         | 439921 | 3.201045 | 0.659838 |
| 210123_s_at | cholinergic receptor, nicotinic, alpha 7 /// CHRNA7 (cholinergic receptor, nicotinic, alpha 7, exons 1-7)    | CHRFA7A /// 1139 /// 8983     |        | 3.200541 | 0.659838 |
| 204571_x_at | protein (peptidylprolyl cis/trans isomerase) NIMA-interacting, 4 (parvulin)                                  | PIN4                          | 5303   | 3.200525 | 0.659838 |
| 202101_s_at | v-ral simian leukemia viral oncogene homolog B (ras related; GTP binding protein)                            | RALB                          | 5899   | 3.195971 | 0.659838 |
| 216448_at   | CDNA FLJ12624 fis. clone NT2RM4001754                                                                        | ---                           | ---    | 3.195322 | 0.659838 |
| 214669_x_at | immunoglobulin kappa locus                                                                                   | IGK@                          | 50802  | 3.191469 | 0.659838 |
| 208465_at   | glutamate receptor, metabotropic 2                                                                           | GRM2                          | 2912   | 3.184808 | 0.659838 |
| 215075_s_at | growth factor receptor-bound protein 2                                                                       | GRB2                          | 2885   | 3.182688 | 0.659838 |
| 207132_x_at | prefoldin subunit 5                                                                                          | PFDN5                         | 5204   | 3.175111 | 0.659838 |
| 203831_at   | R3H domain containing 2                                                                                      | R3HDM2                        | 22864  | 3.173792 | 0.659838 |
| 206337_at   | chemokine (C-C motif) receptor 7                                                                             | CCR7                          | 1236   | 3.172548 | 0.659838 |
| 218922_s_at | LAG1 homolog, ceramide synthase 4                                                                            | LASS4                         | 79603  | 3.165543 | 0.659838 |
| 208040_s_at | myosin binding protein C, cardiac                                                                            | MYBPC3                        | 4607   | 3.164944 | 0.659838 |
| 208187_s_at | ---                                                                                                          | ---                           | ---    | 3.163819 | 0.659838 |
| 222294_s_at | CDNA clone IMAGE:5745639                                                                                     | ---                           | ---    | 3.163475 | 0.659838 |
| 219451_at   | methionine sulfoxide reductase B2                                                                            | MSRB2                         | 22921  | 3.158655 | 0.659838 |
| 202206_at   | ADP-ribosylation factor-like 4C                                                                              | ARL4C                         | 10123  | 3.145435 | 0.659838 |
| 203758_at   | cathepsin O                                                                                                  | CTSO                          | 1519   | 3.145395 | 0.659838 |
| 221912_s_at | coiled-coil domain containing 28B                                                                            | CCDC28B                       | 79140  | 3.143915 | 0.659838 |
| 205163_at   | fast skeletal myosin light chain 2                                                                           | MYLPF                         | 29895  | 3.142725 | 0.659838 |
| 200046_at   | defender against cell death 1                                                                                | DAD1                          | 1603   | 3.127426 | 0.659838 |
| 218380_at   | NLR family, pyrin domain containing 1                                                                        | NLRP1                         | 22861  | 3.127069 | 0.659838 |
| 203595_s_at | interferon-induced protein with tetratricopeptide repeats 5                                                  | IFIT5                         | 24138  | 3.125097 | 0.659838 |
| 203313_s_at | TGFB-induced factor homeobox 1                                                                               | TGIF1                         | 7050   | 3.123613 | 0.659838 |
| 202822_at   | LIM domain containing preferred translocation partner in lipoma                                              | LPP                           | 4026   | 3.123101 | 0.659838 |
| 214358_at   | acetyl-Coenzyme A carboxylase alpha                                                                          | ACACA                         | 31     | 3.117105 | 0.659838 |
| 206821_x_at | HIV-1 Rev binding protein-like                                                                               | HRBL                          | 3268   | 3.108878 | 0.659838 |
| 215412_x_at | postmeiotic segregation increased 2-like 2                                                                   | PMS2L2                        | 5380   | 3.108382 | 0.659838 |
| 200616_s_at | KIAA0152                                                                                                     | KIAA0152                      | 9761   | 3.108375 | 0.659838 |
| 214069_at   | acyl-CoA synthetase medium-chain family member 2A /// acyl-CoA synthetase medium-chain family member 2A      | ACSM2A /// A123876 /// 34     |        | 3.107276 | 0.659838 |
| 209846_s_at | butyrophilin, subfamily 3, member A2                                                                         | BTN3A2                        | 11118  | 3.104637 | 0.659838 |
| 218600_at   | LIM domain containing 2                                                                                      | LIMD2                         | 80774  | 3.103956 | 0.659838 |
| 218589_at   | purinergic receptor P2Y, G-protein coupled, 5                                                                | P2RY5                         | 10161  | 3.100489 | 0.659838 |
| 215211_at   | RRN3 RNA polymerase I transcription factor homolog (S. cerevisiae) pseudogene                                | LOC730092                     | 730092 | 3.097573 | 0.659838 |
| 208403_x_at | MYC associated factor X                                                                                      | MAX                           | 4149   | 3.097516 | 0.659838 |
| 204867_at   | GTP cyclohydrolase I feedback regulator                                                                      | GCHFR                         | 2644   | 3.095074 | 0.659838 |
| 219724_s_at | KIAA0748                                                                                                     | KIAA0748                      | 9840   | 3.092041 | 0.659838 |
| 214054_at   | docking protein 2, 56kDa                                                                                     | DOK2                          | 9046   | 3.088263 | 0.659838 |
| 203964_at   | N-myc (and STAT) interactor                                                                                  | NMI                           | 9111   | 3.078189 | 0.659838 |
| 219759_at   | endoplasmic reticulum aminopeptidase 2                                                                       | ERAP2                         | 64167  | 3.076226 | 0.659838 |
| 204174_at   | arachidonate 5-lipoxygenase-activating protein                                                               | ALOX5AP                       | 241    | 3.074033 | 0.659838 |
| 202296_s_at | RER1 retention in endoplasmic reticulum 1 homolog (S. cerevisiae)                                            | RER1                          | 11079  | 3.074005 | 0.659838 |
| 202207_at   | ADP-ribosylation factor-like 4C                                                                              | ARL4C                         | 10123  | 3.071935 | 0.659838 |

Supplementary Table 5: Jurakt cells stimulated with PD-1/CD3/CD28 vs. CD3/CD28

|             |                                                                                                                              |                             |        |          |          |
|-------------|------------------------------------------------------------------------------------------------------------------------------|-----------------------------|--------|----------|----------|
| 213915_at   | natural killer cell group 7 sequence                                                                                         | NGK7                        | 4818   | 3.071858 | 0.659838 |
| 200604_s_at | protein kinase, cAMP-dependent, regulatory, type I, alpha (tissue specific extinguisher 1)                                   | PRKARIA                     | 5573   | 3.071435 | 0.659838 |
| 219066_at   | phosphopantothenoylcysteine decarboxylase                                                                                    | PPDC                        | 60490  | 3.070842 | 0.659838 |
| 212853_at   | DCN1, defective in cullin neddylation 1, domain containing 4 (S. cerevisiae)                                                 | DCUN1D4                     | 23142  | 3.065712 | 0.659838 |
| 207677_s_at | neutrophil cytosolic factor 4, 40kDa                                                                                         | NCF4                        | 4689   | 3.062292 | 0.659838 |
| 218610_s_at | hypothetical protein FLJ11151                                                                                                | FLJ11151                    | 55313  | 3.059331 | 0.659838 |
| 212452_x_at | MYST histone acetyltransferase (monocytic leukemia) 4                                                                        | MYST4                       | 23522  | 3.056358 | 0.659838 |
| 221044_s_at | tripartite motif-containing 34 /// TRIM6-TRIM34                                                                              | TRIM34 /// TR 445372 /// 53 | 53     | 3.052578 | 0.659838 |
| 49679_s_at  | Metallothionein 1 pseudogene 3                                                                                               | MT1P3                       | 140851 | 3.050689 | 0.659838 |
| 213357_at   | general transcription factor IIH, polypeptide 5                                                                              | GTF2H5                      | 404672 | 3.050053 | 0.659838 |
| 214512_s_at | SUB1 homolog (S. cerevisiae)                                                                                                 | SUB1                        | 10923  | 3.049781 | 0.659838 |
| 201328_at   | v-ets erythroblastosis virus E26 oncogene homolog 2 (avian)                                                                  | ETS2                        | 2114   | 3.045932 | 0.659838 |
| 209201_x_at | chemokine (C-X-C motif) receptor 4                                                                                           | CXCR4                       | 7852   | 3.044945 | 0.659838 |
| 218992_at   | chromosome 9 open reading frame 46                                                                                           | C9orf46                     | 55848  | 3.043275 | 0.659838 |
| 218559_s_at | v-maf musculoaponeurotic fibrosarcoma oncogene homolog B (avian)                                                             | MAFB                        | 9935   | 3.039409 | 0.659838 |
| 201045_s_at | RAB6A, member RAS oncogene family /// RAB6C-like                                                                             | LOC150786 /// 150786 /// 58 | 58     | 3.038122 | 0.659838 |
| 217888_s_at | ADP-ribosylation factor GTPase activating protein 1                                                                          | ARFGAP1                     | 55738  | 3.035113 | 0.659838 |
| 212954_at   | dual-specificity tyrosine-(Y)-phosphorylation regulated kinase 4                                                             | DYRK4                       | 8798   | 3.035098 | 0.659838 |
| 215173_at   | leucine rich repeat containing 50                                                                                            | LRRC50                      | 123872 | 3.033865 | 0.659838 |
| 202393_s_at | Kruppel-like factor 10                                                                                                       | KLF10                       | 7071   | 3.029521 | 0.659838 |
| 215223_s_at | superoxide dismutase 2, mitochondrial                                                                                        | SOD2                        | 6648   | 3.026709 | 0.659838 |
| 209147_s_at | phosphatidic acid phosphatase type 2A                                                                                        | PPAP2A                      | 8611   | 3.024863 | 0.659838 |
| 205910_s_at | carboxyl ester lipase (bile salt-stimulated lipase)                                                                          | CEL                         | 1056   | 3.023574 | 0.659838 |
| 214144_at   | Polymerase (RNA) II (DNA directed) polypeptide D                                                                             | POLR2D                      | 5433   | 3.01744  | 0.659838 |
| 220160_s_at | kaptin (actin binding protein)                                                                                               | KPTN                        | 11133  | 3.016844 | 0.659838 |
| 211456_x_at | metallothionein 1 pseudogene 2                                                                                               | MT1P2                       | 645745 | 3.012768 | 0.659838 |
| 217981_s_at | fracture callus 1 homolog (rat)                                                                                              | FXC1                        | 26515  | 3.010512 | 0.659838 |
| 207179_at   | T-cell leukemia homeobox 1                                                                                                   | TLX1                        | 3195   | 3.008433 | 0.659838 |
| 214841_at   | cornichon homolog 3 (Drosophila)                                                                                             | CNIH3                       | 149111 | 3.008379 | 0.659838 |
| 217751_at   | glutathione S-transferase kappa 1                                                                                            | GSTK1                       | 373156 | 3.008181 | 0.659838 |
| 216470_x_at | protease, serine, 1 (trypsin 1) /// protease, serine, 2 (trypsin 2) /// protease, serine, 3 (mesotrypsin)                    | PRSS1 /// PRS 154754 /// 56 | 56     | 3.007066 | 0.659838 |
| 209344_at   | tropomyosin 4                                                                                                                | TPM4                        | 7171   | 3.005798 | 0.659838 |
| 220492_s_at | otoflerin                                                                                                                    | OTOF                        | 9381   | 3.004706 | 0.659838 |
| 216859_x_at | ---                                                                                                                          | ---                         | ---    | 3.00434  | 0.659838 |
| 221693_s_at | mitochondrial ribosomal protein S18A                                                                                         | MRPS18A                     | 55168  | 3.003459 | 0.659838 |
| 208012_x_at | SP110 nuclear body protein                                                                                                   | SP110                       | 3431   | 2.991967 | 0.659838 |
| 209292_at   | Inhibitor of DNA binding 4, dominant negative helix-loop-helix protein                                                       | ID4                         | 3400   | 2.991604 | 0.659838 |
| 219534_x_at | cyclin-dependent kinase inhibitor 1C (p57, Kip2)                                                                             | CDKN1C                      | 1028   | 2.989513 | 0.659838 |
| 218400_at   | 2'-5'-oligoadenylate synthetase 3, 100kDa                                                                                    | OAS3                        | 4940   | 2.98878  | 0.659838 |
| 201295_s_at | ---                                                                                                                          | ---                         | ---    | 2.987276 | 0.659838 |
| 218250_s_at | CCR4-NOT transcription complex, subunit 7                                                                                    | CNOT7                       | 29883  | 2.984043 | 0.659838 |
| 220769_s_at | WD repeat domain 78                                                                                                          | WDR78                       | 79819  | 2.983825 | 0.659838 |
| 221277_s_at | pseudouridylate synthase 3                                                                                                   | PUS3                        | 83480  | 2.978688 | 0.659838 |
| 205198_s_at | ATPase, Cu++ transporting, alpha polypeptide (Menkes syndrome) /// similar to ATPase, Cu++ transporting, alpha polypeptide 1 | ATP7A /// LOC 538 /// 64473 | 64473  | 2.976605 | 0.659838 |
| 200849_s_at | S-adenosylhomocysteine hydrolase-like 1                                                                                      | AHCYL1                      | 10768  | 2.975782 | 0.659838 |
| 206508_at   | CD70 molecule                                                                                                                | CD70                        | 970    | 2.972228 | 0.659838 |
| 221200_at   | ---                                                                                                                          | ---                         | ---    | 2.966979 | 0.659838 |
| 212587_s_at | protein tyrosine phosphatase, receptor type, C                                                                               | PTPRC                       | 5788   | 2.958381 | 0.659838 |
| 205692_s_at | CD38 molecule                                                                                                                | CD38                        | 952    | 2.957133 | 0.659838 |
| 204326_x_at | metallothionein 1X                                                                                                           | MT1X                        | 4501   | 2.953085 | 0.659838 |
| 207238_s_at | protein tyrosine phosphatase, receptor type, C                                                                               | PTPRC                       | 5788   | 2.952252 | 0.659838 |
| 218725_at   | solute carrier family 25 (mitochondrial carrier: glutamate), member 22                                                       | SLC25A22                    | 79751  | 2.951625 | 0.659838 |
| 212851_at   | DCN1, defective in cullin neddylation 1, domain containing 4 (S. cerevisiae)                                                 | DCUN1D4                     | 23142  | 2.950332 | 0.659838 |
| 207766_at   | cyclin-dependent kinase-like 1 (CDC2-related kinase)                                                                         | CDKL1                       | 8814   | 2.948535 | 0.659838 |
| 206751_s_at | phosphate cytidyltransferase 1, choline, beta                                                                                | PCYT1B                      | 9468   | 2.940486 | 0.659838 |
| 222275_at   | Full-length cDNA clone CS0DK012YA15 of HeLa cells Cot 25-normalized of Homo sapiens (human)                                  | ---                         | ---    | 2.937275 | 0.659838 |
| 200878_at   | endothelial PAS domain protein 1                                                                                             | EPAS1                       | 2034   | 2.935505 | 0.659838 |
| 209924_at   | chemokine (C-C motif) ligand 18 (pulmonary and activation-regulated)                                                         | CCL18                       | 6362   | 2.933877 | 0.659838 |
| 207694_at   | POU class 3 homeobox 4                                                                                                       | POU3F4                      | 5456   | 2.933324 | 0.659838 |
| 201246_s_at | OTU domain, ubiquitin aldehyde binding 1                                                                                     | OTUB1                       | 55611  | 2.932434 | 0.659838 |
| 210638_s_at | F-box protein 9                                                                                                              | FBX09                       | 26268  | 2.931394 | 0.659838 |
| 201055_s_at | heterogeneous nuclear ribonucleoprotein A0                                                                                   | HNRNPA0                     | 10949  | 2.930226 | 0.659838 |
| 202435_s_at | cytochrome P450, family 1, subfamily B, polypeptide 1                                                                        | CYP1B1                      | 1545   | 2.927656 | 0.659838 |
| 216137_s_at | Mitogen-activated protein kinase 8 interacting protein 3                                                                     | MAPK8IP3                    | 23162  | 2.92755  | 0.659838 |
| 1431_at     | cytochrome P450, family 2, subfamily E, polypeptide 1                                                                        | CYP2E1                      | 1571   | 2.925226 | 0.659838 |
| 221562_s_at | sirtuin (silent mating type information regulation 2 homolog) 3 (S. cerevisiae)                                              | SIRT3                       | 23410  | 2.915722 | 0.659838 |
| 219506_at   | chromosome 1 open reading frame 54                                                                                           | C1orf54                     | 79630  | 2.9111   | 0.659838 |
| 205784_x_at | armadillo repeat gene deletes in velocardiofacial syndrome                                                                   | ARVCF                       | 421    | 2.910897 | 0.659838 |
| 221507_at   | transportin 2 (importin 3, karyopherin beta 2b)                                                                              | TNPO2                       | 30000  | 2.907218 | 0.659838 |
| 222200_s_at | BSD domain containing 1                                                                                                      | BSDC1                       | 55108  | 2.907084 | 0.659838 |
| 205796_at   | t-complex 11 (mouse)-like 1                                                                                                  | TCP11L1                     | 55346  | 2.906775 | 0.659838 |
| 45714_at    | host cell factor C1 regulator 1 (XPO1 dependent)                                                                             | HCFC1R1                     | 54985  | 2.904465 | 0.659838 |
| 206100_at   | carboxypeptidase M                                                                                                           | CPM                         | 1368   | 2.902093 | 0.659838 |
| 206410_at   | nuclear receptor subfamily 0, group B, member 2                                                                              | NR0B2                       | 8431   | 2.901963 | 0.659838 |
| 203304_at   | BMP and activin membrane-bound inhibitor homolog (Xenopus laevis)                                                            | BAMBI                       | 25805  | 2.898868 | 0.659838 |
| 205116_at   | laminin, alpha 2 (merosin, congenital muscular dystrophy)                                                                    | LAMA2                       | 3908   | 2.898746 | 0.659838 |
| 212007_at   | UBX domain containing 2                                                                                                      | UBXD2                       | 23190  | 2.897988 | 0.659838 |
| 204759_at   | regulator of chromosome condensation (RCC1) and BTB (POZ) domain containing protein 2                                        | RCBTB2                      | 1102   | 2.894497 | 0.659838 |
| 207084_at   | POU class 3 homeobox 2                                                                                                       | POU3F2                      | 5454   | 2.888394 | 0.659838 |
| 206804_at   | CD3g molecule, gamma (CD3-TCR complex)                                                                                       | CD3G                        | 917    | 2.8863   | 0.659838 |
| 205852_at   | cyclin-dependent kinase 5, regulatory subunit 2 (p39)                                                                        | CDK5R2                      | 8941   | 2.886288 | 0.659838 |
| 203005_at   | lymphotoxin beta receptor (TNFR superfamily, member 3)                                                                       | LTBR                        | 4055   | 2.885604 | 0.659838 |
| 204683_at   | intercellular adhesion molecule 2                                                                                            | ICAM2                       | 3384   | 2.885463 | 0.659838 |
| 220909_at   | tripartite motif-containing 46                                                                                               | TRIM46                      | 80128  | 2.882499 | 0.659838 |
| 213257_at   | sterile alpha and TIR motif containing 1                                                                                     | SARM1                       | 23098  | 2.879932 | 0.659838 |
| 201012_at   | annexin A1                                                                                                                   | ANXA1                       | 301    | 2.878469 | 0.659838 |

Supplementary Table 5: Jurakt cells stimulated with PD-1/CD3/CD28 vs. CD3/CD28

|             |                                                                                                     |                            |               |          |          |
|-------------|-----------------------------------------------------------------------------------------------------|----------------------------|---------------|----------|----------|
| 220740_s_at | solute carrier family 12 (potassium/chloride transporters), member 6                                | SLC12A6                    | 9990          | 2.876374 | 0.659838 |
| 215069_at   | N-myristoyltransferase 2                                                                            | NMT2                       | 9397          | 2.875929 | 0.659838 |
| 213757_at   | Transcribed locus, weakly similar to XP_001478155.1 PREDICTED: hypothetical protein [Mus mus]       | ---                        | ---           | 2.87568  | 0.659838 |
| 215259_s_at | cell adhesion molecule 4                                                                            | CADM4                      | 199731        | 2.874941 | 0.659838 |
| 222041_at   | DPH1 homolog (S. cerevisiae) /// candidate tumor suppressor in ovarian cancer 2                     | DPH1 /// OVC_124641 /// 18 | ---           | 2.872937 | 0.659838 |
| 215863_at   | transferrin receptor 2                                                                              | TFR2                       | 7036          | 2.871378 | 0.659838 |
| 221243_s_at | ---                                                                                                 | ---                        | ---           | 2.869943 | 0.659838 |
| 206556_at   | clusterin-like 1 (retinal)                                                                          | CLUL1                      | 27098         | 2.867342 | 0.659838 |
| 210104_at   | mediator complex subunit 6                                                                          | MED6                       | 10001         | 2.865525 | 0.659838 |
| 202180_s_at | major vault protein                                                                                 | MVP                        | 9961          | 2.861996 | 0.659838 |
| 204350_s_at | mediator complex subunit 7                                                                          | MED7                       | 9443          | 2.857736 | 0.659838 |
| 216127_at   | protein disulfide isomerase family A, member 2                                                      | PDIA2                      | 64714         | 2.856509 | 0.659838 |
| 207090_x_at | zinc finger protein 30 homolog (mouse)                                                              | ZFP30                      | 22835         | 2.85321  | 0.659838 |
| 205224_at   | surfeit 2                                                                                           | SURF2                      | 6835          | 2.851708 | 0.659838 |
| 213931_at   | inhibitor of DNA binding 2, dominant negative helix-loop-helix protein /// inhibitor of DNA binding | ID2 /// ID2B               | 3398 /// 8409 | 2.850662 | 0.659838 |
| 211753_s_at | relaxin 1                                                                                           | RLN1                       | 6013          | 2.850191 | 0.659838 |
| 201739_at   | serum/glucocorticoid regulated kinase 1                                                             | SGK1                       | 6446          | 2.845651 | 0.659838 |
| 221210_s_at | N-acetylneuraminase pyruvate lyase (dihydrodipicolinate synthase)                                   | NPL                        | 80896         | 2.845403 | 0.659838 |
| 204257_at   | fatty acid desaturase 3                                                                             | FADS3                      | 3995          | 2.843792 | 0.659838 |
| 203260_at   | HD domain containing 2                                                                              | HDCC2                      | 51020         | 2.84045  | 0.659838 |
| 218169_at   | Vac14 homolog (S. cerevisiae)                                                                       | VAC14                      | 55697         | 2.834142 | 0.659838 |
| 221557_s_at | lymphoid enhancer-binding factor 1                                                                  | LEF1                       | 51176         | 2.831736 | 0.660294 |
| 215797_at   | T cell receptor alpha variable 8-3                                                                  | TRAV8-3                    | 28683         | 2.817516 | 0.666139 |
| 206076_at   | leucine rich repeat containing 23                                                                   | LRRC23                     | 10233         | 2.815688 | 0.666139 |
| 202011_at   | tight junction protein 1 (zona occludens 1)                                                         | TJP1                       | 7082          | 2.813338 | 0.666139 |
| 201194_at   | selenoprotein W, 1                                                                                  | SEPW1                      | 6415          | 2.812785 | 0.666139 |
| 219667_s_at | B-cell scaffold protein with ankyrin repeats 1                                                      | BANK1                      | 55024         | 2.811398 | 0.666139 |
| 209772_s_at | CD24 molecule                                                                                       | CD24                       | 934           | 2.80833  | 0.666139 |
| 205343_at   | sulfotransferase family, cytosolic, 1C, member 2                                                    | SULT1C2                    | 6819          | 2.8079   | 0.666139 |
| 211613_s_at | glycerol-3-phosphate dehydrogenase 2 (mitochondrial)                                                | GPD2                       | 2820          | 2.807271 | 0.666139 |
| 202298_at   | NADH dehydrogenase (ubiquinone) 1 alpha subcomplex, 1, 7.5kDa                                       | NDUFA1                     | 4694          | 2.804105 | 0.667653 |
| 200605_s_at | protein kinase, cAMP-dependent, regulatory, type I, alpha (tissue specific extinguisher 1)          | PRKAR1A                    | 5573          | 2.801286 | 0.669687 |
| 202929_s_at | D-dopachrome tautomerase                                                                            | DDT                        | 1652          | 2.799737 | 0.670415 |
| 202446_s_at | phospholipid scramblase 1                                                                           | PLSCR1                     | 5359          | 2.797744 | 0.670898 |
| 201628_s_at | Ras-related GTP binding A                                                                           | RRAGA                      | 10670         | 2.796942 | 0.670898 |
| 208104_s_at | TSC22 domain family, member 4                                                                       | TSC22D4                    | 81628         | 2.79553  | 0.670898 |
| 209168_at   | glycoprotein M6B                                                                                    | GPM6B                      | 2824          | 2.793972 | 0.670898 |
| 211902_x_at | T cell receptor alpha locus                                                                         | TRA@                       | 6955          | 2.791069 | 0.670898 |
| 211986_at   | AHNAK nucleoprotein                                                                                 | AHNAK                      | 79026         | 2.789055 | 0.670898 |
| 212784_at   | capicua homolog (Drosophila)                                                                        | CIC                        | 23152         | 2.788591 | 0.670898 |
| 218482_at   | enhancer of yellow 2 homolog (Drosophila)                                                           | ENY2                       | 56943         | 2.787771 | 0.670898 |
| 207339_s_at | lymphotoxin beta (TNF superfamily, member 3)                                                        | LTB                        | 4050          | 2.782622 | 0.670898 |
| 218815_s_at | transmembrane protein 51                                                                            | TMEM51                     | 55092         | 2.779073 | 0.672775 |
| 221185_s_at | IQ motif containing G                                                                               | IQCG                       | 84223         | 2.778605 | 0.672775 |
| 211861_x_at | CD28 molecule                                                                                       | CD28                       | 940           | 2.776363 | 0.672775 |
| 219113_x_at | hydroxysteroid (17-beta) dehydrogenase 14                                                           | HSD17B14                   | 51171         | 2.771317 | 0.67416  |
| 211465_x_at | fucosyltransferase 6 (alpha (1,3) fucosyltransferase)                                               | FUT6                       | 2528          | 2.761412 | 0.677651 |
| 209671_x_at | T cell receptor alpha locus /// T cell receptor alpha constant                                      | TRA@ /// TRA               | 28755 /// 695 | 2.760719 | 0.677651 |
| 205579_at   | histamine receptor H1                                                                               | HRH1                       | 3269          | 2.753222 | 0.677769 |
| 217332_at   | similar to CTAGE family, member 5                                                                   | LOC647288 // 647288 /// 73 | ---           | 2.750663 | 0.677769 |
| 218376_s_at | microtubule associated monooxygenase, calponin and LIM domain containing 1                          | MICAL1                     | 64780         | 2.750547 | 0.677769 |
| 219161_s_at | chemokine-like factor                                                                               | CKLF                       | 51192         | 2.749735 | 0.677769 |
| 211911_x_at | major histocompatibility complex, class I, B                                                        | HLA-B                      | 3106          | 2.749108 | 0.677769 |
| 202637_s_at | intercellular adhesion molecule 1 (CD54), human rhinovirus receptor                                 | ICAM1                      | 3383          | 2.7474   | 0.677769 |
| 221696_s_at | serine/threonine/tyrosine kinase 1                                                                  | STYK1                      | 55359         | 2.744325 | 0.677769 |
| 219214_s_at | 5', 3'-nucleotidase, cytosolic                                                                      | NT5C                       | 30833         | 2.742564 | 0.677769 |
| 218118_s_at | translocase of inner mitochondrial membrane 23 homolog (yeast)                                      | TIMM23                     | 10431         | 2.740762 | 0.677769 |
| 218369_s_at | exosome component 1                                                                                 | EXOSC1                     | 51013         | 2.740281 | 0.677769 |
| 210218_s_at | SP100 nuclear antigen                                                                               | SP100                      | 6672          | 2.739249 | 0.677769 |
| 219107_at   | brevican                                                                                            | BCAN                       | 63827         | 2.737701 | 0.677769 |
| 222356_at   | Transcribed locus                                                                                   | ---                        | ---           | 2.73657  | 0.677769 |
| 203610_s_at | tripartite motif-containing 38                                                                      | TRIM38                     | 10475         | 2.73411  | 0.677769 |
| 209276_s_at | glutaredoxin (thioltransferase)                                                                     | GLRX                       | 2745          | 2.732356 | 0.677769 |
| 208659_at   | chloride intracellular channel 1                                                                    | CLIC1                      | 1192          | 2.73142  | 0.677769 |
| 210693_at   | signal peptide peptidase-like 2B                                                                    | SPPL2B                     | 56928         | 2.730862 | 0.677769 |
| 211098_x_at | transmembrane and coiled-coil domains 1                                                             | TMCO1                      | 54499         | 2.727776 | 0.677769 |
| 215645_at   | Folliculin                                                                                          | FLCN                       | 201163        | 2.720219 | 0.677769 |
| 203037_s_at | metastasis suppressor 1                                                                             | MTSS1                      | 9788          | 2.719512 | 0.677769 |
| 214480_at   | ets variant gene 3                                                                                  | ETV3                       | 2117          | 2.71931  | 0.677769 |
| 202592_at   | biogenesis of lysosome-related organelles complex-1, subunit 1                                      | BLOC1S1                    | 2647          | 2.717615 | 0.677769 |
| 213050_at   | cordon-bleu homolog (mouse)                                                                         | COBL                       | 23242         | 2.717062 | 0.677769 |
| 215579_at   | apolipoprotein B mRNA editing enzyme, catalytic polypeptide-like 3G                                 | APOBEC3G                   | 60489         | 2.716052 | 0.677769 |
| 202562_s_at | chromosome 14 open reading frame 1                                                                  | C14orf1                    | 11161         | 2.714535 | 0.677769 |
| 211120_x_at | estrogen receptor 2 (ER beta)                                                                       | ESR2                       | 2100          | 2.713074 | 0.677769 |
| 207508_at   | ATP synthase, H+ transporting, mitochondrial F0 complex, subunit C3 (subunit 9)                     | ATP5G3                     | 518           | 2.711119 | 0.677769 |
| 201514_s_at | GTPase activating protein (SH3 domain) binding protein 1                                            | G3BP1                      | 10146         | 2.710628 | 0.677769 |
| 220544_at   | testis-specific kinase substrate                                                                    | TSKS                       | 60385         | 2.706436 | 0.677769 |
| 212087_s_at | Era G-protein-like 1 (E. coli)                                                                      | ERAL1                      | 26284         | 2.705626 | 0.677769 |
| 204973_at   | gap junction protein, beta 1, 32kDa                                                                 | GJB1                       | 2705          | 2.704887 | 0.677769 |
| 217059_at   | muclin 7, secreted                                                                                  | MUC7                       | 4589          | 2.704338 | 0.677769 |
| 218491_s_at | thymocyte nuclear protein 1                                                                         | THYN1                      | 29087         | 2.703529 | 0.677769 |
| 201601_x_at | interferon induced transmembrane protein 1 (9-27)                                                   | IFITM1                     | 8519          | 2.702711 | 0.677769 |
| 216598_s_at | chemokine (C-C motif) ligand 2                                                                      | CCL2                       | 6347          | 2.702394 | 0.677769 |
| 203485_at   | reticulon 1                                                                                         | RTN1                       | 6252          | 2.697201 | 0.677769 |
| 201590_x_at | annexin A2                                                                                          | ANXA2                      | 302           | 2.696669 | 0.677769 |
| 203932_at   | major histocompatibility complex, class II, DM beta                                                 | HLA-DMB                    | 3109          | 2.694472 | 0.677769 |

Supplementary Table 5: Jurakt cells stimulated with PD-1/CD3/CD28 vs. CD3/CD28

|             |                                                                                          |           |        |          |          |
|-------------|------------------------------------------------------------------------------------------|-----------|--------|----------|----------|
| 218282_at   | ER degradation enhancer, mannosidase alpha-like 2                                        | EDEM2     | 55741  | 2.692505 | 0.677769 |
| 203008_x_at | thioredoxin domain containing 9                                                          | TXNDC9    | 10190  | 2.690061 | 0.677769 |
| 201891_s_at | beta-2-microglobulin                                                                     | B2M       | 567    | 2.689404 | 0.677769 |
| 221816_s_at | PHD finger protein 11                                                                    | PHF11     | 51131  | 2.684377 | 0.677769 |
| 211031_s_at | CAP-GLY domain containing linker protein 2                                               | CLIP2     | 7461   | 2.683228 | 0.677769 |
| 210723_x_at | hypothetical protein MGC4771                                                             | MGC4771   | 84754  | 2.681853 | 0.677769 |
| 217966_s_at | family with sequence similarity 129, member A                                            | FAM129A   | 116496 | 2.679718 | 0.677769 |
| 218117_at   | ring-box 1                                                                               | RBX1      | 9978   | 2.679083 | 0.677769 |
| 212303_x_at | ---                                                                                      | ---       | ---    | 2.67643  | 0.677769 |
| 219147_s_at | chromosome 9 open reading frame 95                                                       | C9orf95   | 54981  | 2.6756   | 0.677769 |
| 212079_s_at | myeloid/lymphoid or mixed-lineage leukemia (trithorax homolog, Drosophila)               | MLL       | 4297   | 2.675356 | 0.677769 |
| 218996_at   | TCF3 (E2A) fusion partner (in childhood Leukemia)                                        | TFPT      | 29844  | 2.674804 | 0.677769 |
| 201641_at   | bone marrow stromal cell antigen 2                                                       | BST2      | 684    | 2.672552 | 0.677769 |
| 220941_s_at | chromosome 21 open reading frame 91                                                      | C21orf91  | 54149  | 2.672014 | 0.677769 |
| 205179_s_at | ADAM metalloproteinase domain 8                                                          | ADAM8     | 101    | 2.668417 | 0.677769 |
| 218048_at   | COMM domain containing 3                                                                 | COMMD3    | 23412  | 2.666564 | 0.677769 |
| 206484_s_at | X-prolyl aminopeptidase (aminopeptidase P) 2, membrane-bound                             | XPNPEP2   | 7512   | 2.665828 | 0.677769 |
| 214150_x_at | ATPase, H+ transporting, lysosomal 9kDa, V0 subunit e1                                   | ATP6V0E1  | 8992   | 2.662168 | 0.677769 |
| 217497_at   | endothelial cell growth factor 1 (platelet-derived)                                      | ECGF1     | 1890   | 2.660791 | 0.677769 |
| 201631_s_at | immediate early response 3                                                               | IER3      | 8870   | 2.659463 | 0.677769 |
| 202325_s_at | ATP synthase, H+ transporting, mitochondrial F0 complex, subunit F6                      | ATP5J     | 522    | 2.658999 | 0.677769 |
| 205345_at   | BRCA1 associated RING domain 1                                                           | BARD1     | 580    | 2.656693 | 0.677769 |
| 201927_s_at | plakophilin 4                                                                            | PKP4      | 8502   | 2.655599 | 0.677769 |
| 202040_s_at | jumonji, AT rich interactive domain 1A                                                   | JARID1A   | 5927   | 2.654263 | 0.677769 |
| 219475_at   | oxidative stress induced growth inhibitor 1                                              | OSGIN1    | 29948  | 2.652746 | 0.677769 |
| 207867_at   | paired box 4                                                                             | PAX4      | 5078   | 2.652009 | 0.677769 |
| 205098_at   | chemokine (C-C motif) receptor 1                                                         | CCR1      | 1230   | 2.651702 | 0.677769 |
| 202497_x_at | solute carrier family 2 (facilitated glucose transporter), member 3                      | SLC2A3    | 6515   | 2.650363 | 0.677769 |
| 204960_at   | protein tyrosine phosphatase, receptor type, C-associated protein                        | PTPRCAP   | 5790   | 2.648818 | 0.677769 |
| 211436_at   | Clone FLB4228 PRO1095                                                                    | ---       | ---    | 2.647207 | 0.677769 |
| 208249_s_at | TDP-glucose 4,6-dehydratase                                                              | TGDS      | 23483  | 2.645811 | 0.677769 |
| 202074_s_at | optineurin                                                                               | OPTN      | 10133  | 2.645191 | 0.677769 |
| 205681_at   | BCL2-related protein A1                                                                  | BCL2A1    | 597    | 2.642668 | 0.677769 |
| 214200_s_at | Collagen, type VI, alpha 1                                                               | COL6A1    | 1291   | 2.637952 | 0.677769 |
| 219950_s_at | T-cell lymphoma invasion and metastasis 2                                                | TIAM2     | 26230  | 2.637371 | 0.677769 |
| 213875_x_at | chromosome 6 open reading frame 62                                                       | C6orf62   | 81688  | 2.636735 | 0.677769 |
| 215444_s_at | tripartite motif-containing 31                                                           | TRIM31    | 11074  | 2.635291 | 0.677769 |
| 212979_s_at | family with sequence similarity 115, member A                                            | FAM115A   | 9747   | 2.633892 | 0.677769 |
| 210223_s_at | major histocompatibility complex, class I-related                                        | MR1       | 3140   | 2.632832 | 0.677769 |
| 218232_at   | complement component 1, q subcomponent, A chain                                          | C1QA      | 712    | 2.632177 | 0.677769 |
| 210865_at   | Fas ligand (TNF superfamily, member 6)                                                   | FASLG     | 356    | 2.631157 | 0.677769 |
| 218786_at   | 5'-nucleotidase domain containing 3                                                      | NT5DC3    | 51559  | 2.630898 | 0.677769 |
| 205721_at   | GDNF family receptor alpha 2                                                             | GFRA2     | 2675   | 2.628027 | 0.677769 |
| 214534_at   | histone cluster 1, H1b                                                                   | HIST1H1B  | 3009   | 2.622854 | 0.677769 |
| 200785_s_at | low density lipoprotein-related protein 1 (alpha-2-macroglobulin receptor)               | LRP1      | 4035   | 2.621803 | 0.677769 |
| 202022_at   | aldolase C, fructose-bisphosphate                                                        | ALDOC     | 230    | 2.61928  | 0.677769 |
| 216780_at   | CDNA: FLJ21911 fis. clone HEP03855                                                       | ---       | ---    | 2.618278 | 0.677769 |
| 209789_at   | coronin, actin binding protein, 2B                                                       | CORO2B    | 10391  | 2.616127 | 0.677769 |
| 213346_at   | chromosome 13 open reading frame 27                                                      | C13orf27  | 93081  | 2.615397 | 0.677769 |
| 201585_s_at | splicing factor proline/glutamine-rich (polypyrimidine tract binding protein associated) | SFPQ      | 6421   | 2.613151 | 0.677769 |
| 205278_at   | glutamate decarboxylase 1 (brain, 67kDa)                                                 | GAD1      | 2571   | 2.611178 | 0.677769 |
| 208963_x_at | fatty acid desaturase 1                                                                  | FADS1     | 3992   | 2.610965 | 0.677769 |
| 213260_at   | forkhead box C1                                                                          | FOXC1     | 2296   | 2.609683 | 0.677769 |
| 201224_s_at | serine/arginine repetitive matrix 1                                                      | SRRM1     | 10250  | 2.609477 | 0.677769 |
| 203851_at   | insulin-like growth factor binding protein 6                                             | IGFBP6    | 3489   | 2.608294 | 0.677769 |
| 218251_at   | MID1 interacting protein 1 (gastrulation specific G12 homolog (zebrafish))               | MID1IP1   | 58526  | 2.607466 | 0.677769 |
| 202091_at   | glycerophosphodiester phosphodiesterase domain containing 2                              | GDPD2     | 54857  | 2.605695 | 0.677769 |
| 214909_s_at | dimethylarginine dimethylaminohydrolase 2                                                | DDAH2     | 23564  | 2.602671 | 0.677769 |
| 209584_x_at | apolipoprotein B mRNA editing enzyme, catalytic polypeptide-like 3C                      | APOBEC3C  | 27350  | 2.601623 | 0.677769 |
| 200890_s_at | signal sequence receptor, alpha (translocon-associated protein alpha)                    | SSR1      | 6745   | 2.598212 | 0.677769 |
| 214554_at   | histone cluster 1, H2a1                                                                  | HIST1H2AL | 8332   | 2.596813 | 0.677769 |
| 207263_x_at | vezatin, adherens junctions transmembrane protein                                        | VEZT      | 55591  | 2.591569 | 0.677769 |
| 209483_s_at | ---                                                                                      | ---       | ---    | 2.591377 | 0.677769 |
| 216971_s_at | plectin 1, intermediate filament binding protein 500kDa                                  | PLEC1     | 5339   | 2.589861 | 0.677769 |
| 211304_x_at | potassium inwardly-rectifying channel, subfamily J, member 5                             | KCNJ5     | 3762   | 2.588996 | 0.677769 |
| 213806_at   | Purine-rich element binding protein A                                                    | PURA      | 5813   | 2.588207 | 0.677769 |
| 210042_s_at | cathepsin Z                                                                              | CTSZ      | 1522   | 2.588089 | 0.677769 |
| 203456_at   | PRA1 domain family, member 2                                                             | PRAF2     | 11230  | 2.587603 | 0.677769 |
| 221684_s_at | nyctalopin                                                                               | NYX       | 60506  | 2.586138 | 0.677769 |
| 218742_at   | nuclear prelamin A recognition factor-like                                               | NARFL     | 64428  | 2.584359 | 0.677769 |
| 204586_at   | bassoon (presynaptic cytomatrix protein)                                                 | BSN       | 8927   | 2.584095 | 0.677769 |
| 208020_s_at | calcium channel, voltage-dependent, L type, alpha 1C subunit                             | CACNA1C   | 775    | 2.582774 | 0.677769 |
| 216628_at   | ---                                                                                      | ---       | ---    | 2.581445 | 0.677769 |
| 221597_s_at | HSPC171 protein                                                                          | HSPC171   | 29100  | 2.580699 | 0.677769 |
| 205139_s_at | uronyl-2-sulfotransferase                                                                | UST       | 10090  | 2.580267 | 0.677769 |
| 212595_s_at | DAZ associated protein 2                                                                 | DAZAP2    | 9802   | 2.578054 | 0.677955 |
| 221617_at   | TAF9B RNA polymerase II, TATA box binding protein (TBP)-associated factor, 31kDa         | TAF9B     | 51616  | 2.576151 | 0.678698 |
| 214177_s_at | pre-B-cell leukemia homeobox interacting protein 1                                       | PBXIP1    | 57326  | 2.575209 | 0.679061 |
| 219599_at   | eukaryotic translation initiation factor 4B                                              | EIF4B     | 1975   | 2.573357 | 0.679125 |
| 220748_s_at | zinc finger protein 580                                                                  | ZNF580    | 51157  | 2.570412 | 0.680212 |
| 217867_x_at | beta-site APP-cleaving enzyme 2                                                          | BACE2     | 25825  | 2.568516 | 0.680212 |
| 201480_s_at | suppressor of Ty 5 homolog (S. cerevisiae)                                               | SUPT5H    | 6829   | 2.567312 | 0.680212 |
| 216649_at   | ras responsive element binding protein 1                                                 | RREB1     | 6239   | 2.567245 | 0.680212 |
| 204565_at   | thioesterase superfamily member 2                                                        | THEM2     | 55856  | 2.566983 | 0.680212 |
| 218805_at   | GTPase, IMAP family member 5                                                             | GIMAP5    | 55340  | 2.565282 | 0.681388 |
| 218685_s_at | single-strand-selective monofunctional uracil-DNA glycosylase 1                          | SMUG1     | 23583  | 2.563839 | 0.682293 |

Supplementary Table 5: Jurakt cells stimulated with PD-1/CD3/CD28 vs. CD3/CD28

|             |                                                                                                               |                            |       |          |          |
|-------------|---------------------------------------------------------------------------------------------------------------|----------------------------|-------|----------|----------|
| 202518_at   | B-cell CLL/lymphoma 7B                                                                                        | BCL7B                      | 9275  | 2.563223 | 0.68232  |
| 204994_at   | myxovirus (influenza virus) resistance 2 (mouse)                                                              | MX2                        | 4600  | 2.559994 | 0.682811 |
| 213826_s_at | ---                                                                                                           | ---                        | ---   | 2.559324 | 0.682811 |
| 221877_at   | CDNA FLJ38849 fis. clone MESAN2008936                                                                         | ---                        | ---   | 2.557714 | 0.683802 |
| 208945_s_at | beclin 1 (coiled-coil, myosin-like BCL2 interacting protein)                                                  | BECN1                      | 8678  | 2.553835 | 0.684821 |
| 209890_at   | tetraspanin 5                                                                                                 | TSPAN5                     | 10098 | 2.551888 | 0.685223 |
| 210908_s_at | prefoldin subunit 5                                                                                           | PFDN5                      | 5204  | 2.551711 | 0.685223 |
| 206344_at   | paraoxonase 1                                                                                                 | PON1                       | 5444  | 2.550452 | 0.685344 |
| 221875_x_at | major histocompatibility complex, class I, F                                                                  | HLA-F                      | 3134  | 2.549092 | 0.685344 |
| 217811_at   | selenoprotein T                                                                                               | SELT                       | 51714 | 2.547193 | 0.685344 |
| 220989_s_at | amniionless homolog (mouse)                                                                                   | AMN                        | 81693 | 2.545981 | 0.685344 |
| 39549_at    | neuronal PAS domain protein 2                                                                                 | NPAS2                      | 4862  | 2.540313 | 0.685344 |
| 203349_s_at | ets variant gene 5 (ets-related molecule)                                                                     | ETV5                       | 2119  | 2.539169 | 0.685344 |
| 208757_at   | transmembrane emp24 protein transport domain containing 9                                                     | TMED9                      | 54732 | 2.536351 | 0.685344 |
| 216964_at   | Ubiquitin specific peptidase 22                                                                               | USP22                      | 23326 | 2.535836 | 0.685344 |
| 200601_at   | actinin, alpha 4                                                                                              | ACTN4                      | 81    | 2.5348   | 0.685344 |
| 214533_at   | chymase 1, mast cell                                                                                          | CMA1                       | 1215  | 2.533767 | 0.685344 |
| 216611_s_at | solute carrier family 6 (neurotransmitter transporter, noradrenalin), member 2                                | SLC6A2                     | 6530  | 2.532548 | 0.685344 |
| 211997_x_at | H3 histone, family 3B (H3.3B)                                                                                 | H3F3B                      | 3021  | 2.529995 | 0.685344 |
| 216843_x_at | postmeiotic segregation increased 2-like 1 /// similar to postmeiotic segregation increased 2-like            | LOC732139 // 5379 /// 7321 |       | 2.52914  | 0.685344 |
| 201833_at   | histone deacetylase 2                                                                                         | HDAC2                      | 3066  | 2.528667 | 0.685344 |
| 201983_s_at | epidermal growth factor receptor (erythroblastic leukemia viral (v-erb-b) oncogene homolog, avian)            | EGFR                       | 1956  | 2.527836 | 0.685344 |
| 215359_x_at | zinc finger protein 44                                                                                        | ZNF44                      | 51710 | 2.52717  | 0.685344 |
| 203910_at   | Rho GTPase activating protein 29                                                                              | ARHGAP29                   | 9411  | 2.525466 | 0.685344 |
| 215088_s_at | succinate dehydrogenase complex, subunit C, integral membrane protein, 15kDa                                  | SDHC                       | 6391  | 2.524155 | 0.685344 |
| 221350_at   | homeobox C8                                                                                                   | HOXC8                      | 3224  | 2.52376  | 0.685344 |
| 212223_at   | iduronate 2-sulfatase (Hunter syndrome)                                                                       | IDS                        | 3423  | 2.520859 | 0.685344 |
| 211030_s_at | solute carrier family 6 (neurotransmitter transporter, taurine), member 6                                     | SLC6A6                     | 6533  | 2.518367 | 0.685344 |
| 209359_x_at | runt-related transcription factor 1 (acute myeloid leukemia 1; aml1 oncogene)                                 | RUNX1                      | 861   | 2.517362 | 0.685344 |
| 219533_at   | cyclin-dependent kinase inhibitor 1C (p57, Kip2)                                                              | CDKN1C                     | 1028  | 2.514528 | 0.685344 |
| 221479_s_at | BCL2/adenovirus E1B 19kDa interacting protein 3-like                                                          | BNIP3L                     | 665   | 2.511276 | 0.685344 |
| 204607_at   | 3-hydroxy-3-methylglutaryl-Coenzyme A synthase 2 (mitochondrial)                                              | HMGCS2                     | 3158  | 2.51098  | 0.685344 |
| 218357_s_at | translocase of inner mitochondrial membrane 8 homolog B (yeast)                                               | TIMM8B                     | 26521 | 2.510156 | 0.685344 |
| 218861_at   | ring finger protein 25                                                                                        | RNF25                      | 64320 | 2.508715 | 0.685344 |
| 201275_at   | farnesyl diphosphate synthase (farnesyl pyrophosphate synthetase, dimethylallyltranstransferase)              | FDP5                       | 2224  | 2.507374 | 0.685344 |
| 218634_at   | pleckstrin homology-like domain, family A, member 3                                                           | PHLDA3                     | 23612 | 2.504763 | 0.685344 |
| 218031_s_at | forkhead box N3                                                                                               | FOXP3                      | 1112  | 2.50473  | 0.685344 |
| 209046_s_at | GABA(A) receptor-associated protein-like 2                                                                    | GABARAPL2                  | 11345 | 2.504257 | 0.685344 |
| 206754_s_at | cytochrome P450, family 2, subfamily B, polypeptide 7 pseudogene 1                                            | CYP2B7P1                   | 1556  | 2.502132 | 0.685344 |
| 218007_s_at | ribosomal protein S27-like                                                                                    | RPS27L                     | 51065 | 2.500566 | 0.685344 |
| 211529_x_at | major histocompatibility complex, class I, G                                                                  | HLA-G                      | 3135  | 2.500225 | 0.685344 |
| 217950_at   | nitric oxide synthase interacting protein                                                                     | NOSIP                      | 51070 | 2.499986 | 0.685344 |
| 200885_at   | ras homolog gene family, member C                                                                             | RHOC                       | 389   | 2.499244 | 0.685344 |
| 219386_s_at | SLAM family member 8                                                                                          | SLAMF8                     | 56833 | 2.499004 | 0.685344 |
| 219106_s_at | kelch repeat and BTB (POZ) domain containing 10                                                               | KBTD10                     | 10324 | 2.496366 | 0.685344 |
| 214298_x_at | sepiin 6                                                                                                      | 6-Sep                      | 23157 | 2.494717 | 0.685344 |
| 219668_at   | ganglioside-induced differentiation-associated protein 1-like 1                                               | GDAP1L1                    | 78997 | 2.490818 | 0.685344 |
| 219871_at   | hypothetical FLJ13197                                                                                         | FLJ13197                   | 79667 | 2.490472 | 0.685344 |
| 201531_at   | zinc finger protein 36, C3H type, homolog (mouse)                                                             | ZFP36                      | 7538  | 2.490183 | 0.685344 |
| 202961_s_at | ATP synthase, H+ transporting, mitochondrial F0 complex, subunit F2                                           | ATP5J2                     | 9551  | 2.488572 | 0.685344 |
| 209156_s_at | collagen, type VI, alpha 2                                                                                    | COL6A2                     | 1292  | 2.486827 | 0.685344 |
| 216605_s_at | carcinoembryonic antigen-related cell adhesion molecule 21                                                    | CEACAM21                   | 90273 | 2.486406 | 0.685344 |
| 216122_at   | CDNA: FLJ20890 fis. clone ADKA03323                                                                           | ---                        | ---   | 2.481554 | 0.685344 |
| 219097_x_at | chromosome 19 open reading frame 42                                                                           | C19orf42                   | 79086 | 2.48075  | 0.685344 |
| 215526_at   | MRNA; cDNA DKFZp586C2020 (from clone DKFZp586C2020)                                                           | ---                        | ---   | 2.478739 | 0.685344 |
| 214617_at   | perforin 1 (pore forming protein)                                                                             | PRF1                       | 5551  | 2.478682 | 0.685344 |
| 221326_s_at | tubulin, delta 1                                                                                              | TUBD1                      | 51174 | 2.475581 | 0.685344 |
| 207401_at   | prospero homeobox 1                                                                                           | PROX1                      | 5629  | 2.474158 | 0.685344 |
| 218439_s_at | COMM domain containing 10                                                                                     | COMMD10                    | 51397 | 2.472923 | 0.685344 |
| 210304_at   | phosphodiesterase 6B, cGMP-specific, rod, beta (congenital stationary night blindness 3, autosomal recessive) | PDE6B                      | 5158  | 2.472216 | 0.685344 |
| 214157_at   | GNAS complex locus                                                                                            | GNAS                       | 2778  | 2.471159 | 0.685344 |
| 204461_x_at | RAD1 homolog (S. pombe)                                                                                       | RAD1                       | 5810  | 2.470726 | 0.685344 |
| 202747_s_at | integral membrane protein 2A                                                                                  | ITM2A                      | 9452  | 2.470191 | 0.685344 |
| 209216_at   | WD repeat domain 45                                                                                           | WDR45                      | 11152 | 2.469745 | 0.685344 |
| 202641_at   | ADP-ribosylation factor-like 3                                                                                | ARL3                       | 403   | 2.469619 | 0.685344 |
| 213846_at   | cytochrome c oxidase subunit VIic                                                                             | COX7C                      | 1350  | 2.469423 | 0.685344 |
| 201653_at   | cornichon homolog (Drosophila)                                                                                | CNIH                       | 10175 | 2.468773 | 0.685344 |
| 217717_s_at | tyrosine 3-monooxygenase/tryptophan 5-monooxygenase activation protein, beta polypeptide                      | YWHA8                      | 7529  | 2.46836  | 0.685344 |
| 33736_at    | stomatin (EPB72)-like 1                                                                                       | STOML1                     | 9399  | 2.46806  | 0.685344 |
| 203508_at   | tumor necrosis factor receptor superfamily, member 1B                                                         | TNFRSF1B                   | 7133  | 2.468014 | 0.685344 |
| 208792_s_at | clusterin                                                                                                     | CLU                        | 1191  | 2.467382 | 0.685344 |
| 210241_s_at | TP53 activated protein 1                                                                                      | TP53AP1                    | 11257 | 2.465538 | 0.685344 |
| 212056_at   | KIAA0182                                                                                                      | KIAA0182                   | 23199 | 2.465133 | 0.685344 |
| 201331_s_at | signal transducer and activator of transcription 6, interleukin-4 induced                                     | STAT6                      | 6778  | 2.464769 | 0.685344 |
| 210188_at   | GA binding protein transcription factor, alpha subunit 60kDa                                                  | GABPA                      | 2551  | 2.463944 | 0.685344 |
| 213560_at   | Growth arrest and DNA-damage-inducible, beta                                                                  | GADD45B                    | 4616  | 2.46292  | 0.685344 |
| 203591_s_at | colony stimulating factor 3 receptor (granulocyte)                                                            | CSF3R                      | 1441  | 2.462517 | 0.685344 |
| 211732_x_at | histamine N-methyltransferase                                                                                 | HNMT                       | 3176  | 2.461607 | 0.685344 |
| 207437_at   | neuro-oncological ventral antigen 1                                                                           | NOVA1                      | 4857  | 2.460697 | 0.685344 |
| 221599_at   | chromosome 11 open reading frame 67                                                                           | C11orf67                   | 28971 | 2.458657 | 0.685344 |
| 211799_x_at | major histocompatibility complex, class I, C                                                                  | HLA-C                      | 3107  | 2.453284 | 0.685344 |
| 35436_at    | golgi autoantigen, golgin subfamily a, 2                                                                      | GOLGA2                     | 2801  | 2.452143 | 0.685344 |
| 222165_x_at | chromosome 9 open reading frame 16                                                                            | C9orf16                    | 79095 | 2.451037 | 0.685344 |
| 221494_x_at | eukaryotic translation initiation factor 3, subunit K                                                         | EIF3K                      | 27335 | 2.450573 | 0.685344 |
| 211301_at   | potassium voltage-gated channel, Shal-related subfamily, member 3                                             | KCND3                      | 3752  | 2.449972 | 0.685344 |
| 204897_at   | prostaglandin E receptor 4 (subtype EP4)                                                                      | PTGER4                     | 5734  | 2.446946 | 0.685344 |



Supplementary Table 5: Jurakt cells stimulated with PD-1/CD3/CD28 vs. CD3/CD28

|             |                                                                                               |                     |          |          |          |
|-------------|-----------------------------------------------------------------------------------------------|---------------------|----------|----------|----------|
| 205081_at   | cysteine-rich protein 1 (intestinal)                                                          | CRIP1               | 1396     | 2.446518 | 0.685344 |
| 207531_at   | crystallin, gamma C                                                                           | CRYGC               | 1420     | 2.446422 | 0.685344 |
| 203960_s_at | chromosome 1 open reading frame 41                                                            | C1orf41             | 51668    | 2.446014 | 0.685344 |
| 207115_x_at | mbt domain containing 1                                                                       | MBTD1               | 54799    | 2.44549  | 0.685344 |
| 220190_s_at | general transcription factor IIA, 1-like /// STON1-GTF2A1L                                    | GTF2A1L /// S 11036 | /// 286  | 2.44526  | 0.685344 |
| 212279_at   | transmembrane protein 97                                                                      | TMEM97              | 27346    | 2.444399 | 0.685344 |
| 213676_at   | transmembrane protein 151B                                                                    | TMEM151B            | 441151   | 2.444084 | 0.685344 |
| 214475_x_at | calpain 3, (p94)                                                                              | CAPN3               | 825      | 2.443977 | 0.685344 |
| 220798_x_at | plasticity-related gene 2                                                                     | PRG2                | 79948    | 2.443451 | 0.685344 |
| 221563_at   | dual specificity phosphatase 10                                                               | DUSP10              | 11221    | 2.442232 | 0.685344 |
| 203928_x_at | microtubule-associated protein tau                                                            | MAPT                | 4137     | 2.441271 | 0.685344 |
| 216882_s_at | nebulin                                                                                       | NEBL                | 10529    | 2.438473 | 0.685344 |
| 211451_s_at | potassium inwardly-rectifying channel, subfamily J, member 4                                  | KCNJ4               | 3761     | 2.43702  | 0.685344 |
| 214526_x_at | postmeiotic segregation increased 2-like 1                                                    | PMS2L1              | 5379     | 2.434364 | 0.685365 |
| 201541_s_at | zinc finger, HIT type 1                                                                       | ZNHIT1              | 10467    | 2.434071 | 0.685365 |
| 221212_x_at | polybromo 1                                                                                   | PBRM1               | 55193    | 2.432558 | 0.685365 |
| 215640_at   | TBC1 domain family, member 2B                                                                 | TBC1D2B             | 23102    | 2.432211 | 0.685365 |
| 210734_x_at | MYC associated factor X                                                                       | MAX                 | 4149     | 2.431253 | 0.685365 |
| 203451_at   | LIM domain binding 1                                                                          | LDB1                | 8861     | 2.431062 | 0.685365 |
| 221198_at   | secretin                                                                                      | SCT                 | 6343     | 2.430977 | 0.685365 |
| 206993_at   | ATP synthase, H+ transporting, mitochondrial F0 complex, subunit s (factor B)                 | ATP5S               | 27109    | 2.429895 | 0.685365 |
| 213169_at   | sema domain, seven thrombospondin repeats (type 1 and type 1-like), transmembrane domain      | SEMA5A              | 9037     | 2.428232 | 0.685365 |
| 201319_at   | myosin regulatory light chain MRCL3 /// similar to myosin regulatory light chain-like         | LOC645094 /// 10627 | /// 645  | 2.428228 | 0.685365 |
| 215144_at   | Transcribed locus                                                                             | ---                 | ---      | 2.4279   | 0.685365 |
| 214463_x_at | histone cluster 1, H4k /// histone cluster 1, H4j                                             | HIST1H4J /// 8362   | /// 8363 | 2.426872 | 0.685365 |
| 216210_x_at | TRIO and F-actin binding protein                                                              | TRIOBP              | 11078    | 2.426764 | 0.685365 |
| 212003_at   | chromosome 1 open reading frame 144                                                           | C1orf144            | 26099    | 2.425967 | 0.685365 |
| 215392_at   | CDNA FLJ14136 fis. clone MAMMA1002744                                                         | ---                 | ---      | 2.421503 | 0.685365 |
| 204530_s_at | thymocyte selection-associated high mobility group box                                        | TOX                 | 9760     | 2.421259 | 0.685365 |
| 213383_at   | SAPS domain family, member 2                                                                  | SAPS2               | 9701     | 2.42032  | 0.685365 |
| 205654_at   | complement component 4 binding protein, alpha                                                 | C4BPA               | 722      | 2.419779 | 0.685365 |
| 203056_s_at | PR domain containing 2, with ZNF domain                                                       | PRDM2               | 7799     | 2.41818  | 0.685365 |
| 216223_at   | carboxypeptidase N, polypeptide 2                                                             | CPN2                | 1370     | 2.417499 | 0.685365 |
| 220903_at   | G elongation factor, mitochondrial 1                                                          | GFM1                | 85476    | 2.41743  | 0.685365 |
| 219807_x_at | RAB4B, member RAS oncogene family                                                             | RAB4B               | 53916    | 2.417185 | 0.685365 |
| 204479_at   | osteoclast stimulating factor 1                                                               | OSTF1               | 26578    | 2.415404 | 0.685365 |
| 216516_at   | ---                                                                                           | ---                 | ---      | 2.414743 | 0.685365 |
| 203709_at   | phosphorylase kinase, gamma 2 (testis)                                                        | PHKG2               | 5261     | 2.413644 | 0.685365 |
| 200836_s_at | microtubule-associated protein 4                                                              | MAP4                | 4134     | 2.412961 | 0.685365 |
| 209829_at   | chromosome 6 open reading frame 32                                                            | C6orf32             | 9750     | 2.411805 | 0.685365 |
| 221973_at   | CDNA clone IMAGE:5217021, with apparent retained intron                                       | ---                 | ---      | 2.411769 | 0.685365 |
| 201720_s_at | lysosomal associated multispinning membrane protein 5                                         | LAPTM5              | 7805     | 2.410701 | 0.685365 |
| 206929_s_at | nuclear factor I/C (CCAAT-binding transcription factor)                                       | NFIC                | 4782     | 2.410506 | 0.685365 |
| 64488_at    | CDNA FLJ38849 fis. clone MESAN2008936                                                         | ---                 | ---      | 2.410432 | 0.685365 |
| 207052_at   | hepatitis A virus cellular receptor 1                                                         | HAVCR1              | 26762    | 2.409681 | 0.685365 |
| 204769_s_at | transporter 2, ATP-binding cassette, sub-family B (MDR/TAP)                                   | TAP2                | 6891     | 2.409004 | 0.685365 |
| 207127_s_at | heterogeneous nuclear ribonucleoprotein H3 (Z99)                                              | HNRPH3              | 3189     | 2.40838  | 0.685365 |
| 208949_s_at | lectin, galactoside-binding, soluble, 3                                                       | LGALS3              | 3958     | 2.407378 | 0.685365 |
| 219497_s_at | B-cell CLL/lymphoma 11A (zinc finger protein)                                                 | BCL11A              | 53335    | 2.406401 | 0.685365 |
| 216222_s_at | myosin X                                                                                      | MYO10               | 4651     | 2.404643 | 0.685365 |
| 213018_at   | GATA zinc finger domain containing 1                                                          | GATAD1              | 57798    | 2.402838 | 0.685365 |
| 210807_s_at | solute carrier family 16, member 7 (monocarboxylic acid transporter 2)                        | SLC16A7             | 9194     | 2.401928 | 0.685365 |
| 202638_s_at | intercellular adhesion molecule 1 (CD54), human rhinovirus receptor                           | ICAM1               | 3383     | 2.401177 | 0.685365 |
| 201026_at   | eukaryotic translation initiation factor 5B                                                   | EIF5B               | 9669     | 2.399581 | 0.685365 |
| 214398_s_at | inhibitor of kappa light polypeptide gene enhancer in B-cells, kinase epsilon                 | IKBKE               | 9641     | 2.398373 | 0.685365 |
| 220557_s_at | phosphofurin acidic cluster sorting protein 1                                                 | PACS1               | 55690    | 2.397916 | 0.685365 |
| 201341_at   | ectodermal-neural cortex (with BTB-like domain)                                               | ENC1                | 8507     | 2.396271 | 0.685365 |
| 215625_at   | hypothetical protein LOC644450                                                                | LOC644450           | 644450   | 2.388714 | 0.685365 |
| 208204_s_at | caveolin 3                                                                                    | CAV3                | 859      | 2.385785 | 0.685365 |
| 202331_at   | branched chain keto acid dehydrogenase E1, alpha polypeptide                                  | BCKDHA              | 593      | 2.385376 | 0.685365 |
| 204658_at   | transformer-2 alpha                                                                           | TRA2A               | 29896    | 2.383945 | 0.685365 |
| 205746_s_at | ADAM metalloproteinase domain 17 (tumor necrosis factor, alpha, converting enzyme)            | ADAM17              | 6868     | 2.382838 | 0.685365 |
| 205005_s_at | N-myristoyltransferase 2                                                                      | NMT2                | 9397     | 2.381715 | 0.685365 |
| 222244_s_at | taurine upregulated gene 1                                                                    | TUG1                | 55000    | 2.380933 | 0.685365 |
| 201416_at   | SRY (sex determining region Y)-box 4                                                          | SOX4                | 6659     | 2.379837 | 0.685365 |
| 213717_at   | LIM domain binding 3                                                                          | LDB3                | 11155    | 2.379835 | 0.685365 |
| 217419_x_at | agrin                                                                                         | AGRN                | 375790   | 2.379116 | 0.685365 |
| 203987_at   | frizzled homolog 6 (Drosophila)                                                               | FZD6                | 8323     | 2.376525 | 0.685365 |
| 208515_at   | histone cluster 1, H2bm                                                                       | HIST1H2BM           | 8342     | 2.37339  | 0.685365 |
| 212642_s_at | human immunodeficiency virus type I enhancer binding protein 2                                | HIVBP2              | 3097     | 2.370399 | 0.685365 |
| 205368_at   | family with sequence similarity 131, member B                                                 | FAM131B             | 9715     | 2.367576 | 0.685365 |
| 210990_s_at | laminin, alpha 4                                                                              | LAMA4               | 3910     | 2.366895 | 0.685365 |
| 204205_at   | apolipoprotein B mRNA editing enzyme, catalytic polypeptide-like 3G                           | APOBEC3G            | 60489    | 2.36614  | 0.685365 |
| 215572_at   | Similar to Golgin subfamily A member 6 (Golgin linked to PML) (Golgin-like protein)           | LOC646934           | 646934   | 2.365812 | 0.685365 |
| 216361_s_at | MYST histone acetyltransferase (monocytic leukemia) 3                                         | MYST3               | 7994     | 2.364447 | 0.685365 |
| 211833_s_at | BCL2-associated X protein                                                                     | BAX                 | 581      | 2.363029 | 0.685365 |
| 206790_s_at | NADH dehydrogenase (ubiquinone) 1 beta subcomplex, 1, 7kDa                                    | NDUFB1              | 4707     | 2.360036 | 0.685365 |
| 217249_x_at | ---                                                                                           | ---                 | ---      | 2.359444 | 0.685365 |
| 221728_x_at | X (inactive)-specific transcript                                                              | XIST                | 7503     | 2.359297 | 0.685365 |
| 216033_s_at | FYN oncogene related to SRC, FGR, YES                                                         | FYN                 | 2534     | 2.358959 | 0.685365 |
| 219927_at   | FCF1 small subunit (SSU) processome component homolog (S. cerevisiae)                         | FCF1                | 51077    | 2.357155 | 0.685365 |
| 203792_x_at | polycomb group ring finger 2                                                                  | PCGF2               | 7703     | 2.357119 | 0.685365 |
| 214995_s_at | apolipoprotein B mRNA editing enzyme, catalytic polypeptide-like 3G /// apolipoprotein B mRNA | APOBEC3F /// 200316 | /// 60   | 2.356971 | 0.685365 |
| 216449_x_at | heat shock protein 90kDa beta (Grp94), member 1                                               | HSP90B1             | 7184     | 2.354796 | 0.685365 |
| 208736_at   | actin related protein 2/3 complex, subunit 3, 21kDa                                           | ARPC3               | 10094    | 2.353836 | 0.685365 |
| 202595_s_at | leptin receptor overlapping transcript-like 1                                                 | LEPROTL1            | 23484    | 2.35359  | 0.685365 |

Supplementary Table 5: Jurakt cells stimulated with PD-1/CD3/CD28 vs. CD3/CD28

|             |                                                                                                   |                            |               |          |          |
|-------------|---------------------------------------------------------------------------------------------------|----------------------------|---------------|----------|----------|
| 206739_at   | homeobox C5                                                                                       | HOXC5                      | 3222          | 2.349507 | 0.685365 |
| 206940_s_at | POU class 4 homeobox 1                                                                            | POU4F1                     | 5457          | 2.348675 | 0.685365 |
| 200663_at   | CD63 molecule                                                                                     | CD63                       | 967           | 2.347926 | 0.685365 |
| 214788_x_at | dendrin                                                                                           | DDN                        | 23109         | 2.347333 | 0.685365 |
| 201859_at   | serglycin                                                                                         | SRGN                       | 5552          | 2.346423 | 0.685365 |
| 217468_at   | Cytochrome P450, family 2, subfamily D, polypeptide 6                                             | CYP2D6                     | 1565          | 2.346057 | 0.685365 |
| 210715_s_at | serine peptidase inhibitor, Kunitz type 2                                                         | SPINT2                     | 10653         | 2.34257  | 0.685365 |
| 205510_s_at | hypothetical protein FLJ10038                                                                     | FLJ10038                   | 55056         | 2.342325 | 0.685365 |
| 218913_s_at | GEM interacting protein                                                                           | GMIP                       | 51291         | 2.341721 | 0.685365 |
| 219236_at   | progesterin and adiponQ receptor family member VI                                                 | PAQR6                      | 79957         | 2.34057  | 0.685365 |
| 217554_at   | Transcribed locus                                                                                 | ---                        | ---           | 2.340448 | 0.685365 |
| 218537_at   | host cell factor C1 regulator 1 (XPO1 dependent)                                                  | HCFC1R1                    | 54985         | 2.338598 | 0.685365 |
| 212952_at   | Transcribed locus                                                                                 | ---                        | ---           | 2.337874 | 0.685365 |
| 207986_x_at | cytochrome b-561                                                                                  | CYB561                     | 1534          | 2.336603 | 0.685365 |
| 203416_at   | CD53 molecule                                                                                     | CD53                       | 963           | 2.336025 | 0.685365 |
| 207099_s_at | choroideremia (Rab escort protein 1)                                                              | CHM                        | 1121          | 2.33508  | 0.685365 |
| 208042_at   | angiogenic factor with G patch and FHA domains 1                                                  | AGGF1                      | 55109         | 2.333987 | 0.685365 |
| 220274_at   | IQ motif containing with AAA domain                                                               | IQCA                       | 79781         | 2.333357 | 0.685365 |
| 208076_at   | histone cluster 1, H4d                                                                            | HIST1H4D                   | 8360          | 2.333251 | 0.685365 |
| 211868_x_at | immunoglobulin heavy constant alpha 1 /// immunoglobulin heavy constant gamma 1 (G1m mar)         | IGHA1 /// IGH              | 28396 /// 349 | 2.332643 | 0.685365 |
| 216659_at   | dihydrofolate reductase pseudogene                                                                | LOC1720                    | 1720          | 2.332572 | 0.685365 |
| 214436_at   | F-box and leucine-rich repeat protein 2                                                           | FBXL2                      | 25827         | 2.332083 | 0.685365 |
| 217677_at   | pleckstrin homology domain containing, family A (phosphoinositide binding specific) member 2      | PLEKHA2                    | 59339         | 2.331452 | 0.685365 |
| 214324_at   | glycoprotein 2 (zymogen granule membrane)                                                         | GP2                        | 2813          | 2.330371 | 0.685365 |
| 220609_at   | hypothetical protein LOC202181                                                                    | LOC202181                  | 202181        | 2.329875 | 0.685365 |
| 203534_at   | LSM1 homolog, U6 small nuclear RNA associated (S. cerevisiae)                                     | LSM1                       | 27257         | 2.329813 | 0.685365 |
| 204170_s_at | CDC28 protein kinase regulatory subunit 2                                                         | CKS2                       | 1164          | 2.329535 | 0.685365 |
| 203247_s_at | zinc finger protein 24                                                                            | ZNF24                      | 7572          | 2.329093 | 0.685365 |
| 216555_at   | chromosome 22 open reading frame 30                                                               | C22orf30                   | 253143        | 2.32902  | 0.685365 |
| 211012_s_at | promyelocytic leukemia /// hypothetical protein LOC161527                                         | LOC161527 // 161527 /// 53 |               | 2.328721 | 0.685365 |
| 215219_at   | dopey family member 2                                                                             | DOPEY2                     | 9980          | 2.327902 | 0.685365 |
| 205362_s_at | prefoldin subunit 4                                                                               | PFDN4                      | 5203          | 2.326771 | 0.685365 |
| 213736_at   | Cytochrome c oxidase subunit Vb                                                                   | COX5B                      | 1329          | 2.326611 | 0.685365 |
| 212030_at   | RNA binding motif protein 25                                                                      | RBM25                      | 58517         | 2.326325 | 0.685365 |
| 210282_at   | zinc finger, MYM-type 2                                                                           | ZMYM2                      | 7750          | 2.325716 | 0.685365 |
| 221125_s_at | potassium large conductance calcium-activated channel, subfamily M beta member 3                  | KCNMB3                     | 27094         | 2.325421 | 0.685365 |
| 214419_s_at | Cytochrome P450, family 2, subfamily C, polypeptide 9                                             | CYP2C9                     | 1559          | 2.325237 | 0.685365 |
| 202980_s_at | seven in absentia homolog 1 (Drosophila)                                                          | SIAH1                      | 6477          | 2.324244 | 0.685365 |
| 202257_s_at | CD2 (cytoplasmic tail) binding protein 2                                                          | CD2BP2                     | 10421         | 2.323957 | 0.685365 |
| 208439_s_at | ficolin (collagen/fibrinogen domain containing lectin) 2 (hucolin)                                | FCN2                       | 2220          | 2.32369  | 0.685365 |
| 212991_at   | F-box protein 9                                                                                   | FBXO9                      | 26268         | 2.322894 | 0.685365 |
| 215924_at   | CDNA FLJ12040 fis. clone HEMBB1001944                                                             | ---                        | ---           | 2.322551 | 0.685365 |
| 210102_at   | loss of heterozygosity, 11, chromosomal region 2, gene A                                          | LOH11CR2A                  | 4013          | 2.322301 | 0.685365 |
| 204175_at   | zinc finger protein 593                                                                           | ZNF593                     | 51042         | 2.321135 | 0.685365 |
| 206526_at   | RIB43A domain with coiled-coils 2                                                                 | RIBC2                      | 26150         | 2.317583 | 0.685365 |
| 214940_s_at | Smg-6 homolog, nonsense mediated mRNA decay factor (C. elegans)                                   | SMG6                       | 23293         | 2.316067 | 0.685365 |
| 221892_at   | hexose-6-phosphate dehydrogenase (glucose 1-dehydrogenase)                                        | H6PD                       | 9563          | 2.313815 | 0.685365 |
| 207398_at   | homeobox D13                                                                                      | HOXD13                     | 3239          | 2.31349  | 0.685365 |
| 210605_s_at | milk fat globule-EGF factor 8 protein                                                             | MFGE8                      | 4240          | 2.313454 | 0.685365 |
| 212239_at   | phosphoinositide-3-kinase, regulatory subunit 1 (p85 alpha)                                       | PIK3R1                     | 5295          | 2.311151 | 0.685365 |
| 204671_s_at | ankyrin repeat domain 6                                                                           | ANKRD6                     | 22881         | 2.310891 | 0.685365 |
| 220615_s_at | male sterility domain containing 1                                                                | MLSTD1                     | 55711         | 2.310606 | 0.685365 |
| 208664_s_at | tetratricopeptide repeat domain 3                                                                 | TTC3                       | 7267          | 2.309084 | 0.685365 |
| 217188_s_at | chromosome 14 open reading frame 1                                                                | C14orf1                    | 11161         | 2.306911 | 0.685365 |
| 203167_at   | TIMP metalloproteinase inhibitor 2                                                                | TIMP2                      | 7077          | 2.305578 | 0.685365 |
| 205376_at   | inositol polyphosphate-4-phosphatase, type II, 105kDa                                             | INPP4B                     | 8821          | 2.30436  | 0.685365 |
| 213001_at   | angiopoietin-like 2                                                                               | ANGPTL2                    | 23452         | 2.303988 | 0.685365 |
| 202785_at   | NADH dehydrogenase (ubiquinone) 1 alpha subcomplex, 7, 14.5kDa                                    | NDUFA7                     | 4701          | 2.302922 | 0.685365 |
| 217755_at   | hematological and neurological expressed 1                                                        | HN1                        | 51155         | 2.302605 | 0.685365 |
| 214695_at   | ubiquitin associated protein 2-like                                                               | UBAP2L                     | 9898          | 2.302487 | 0.685365 |
| 220861_at   | ---                                                                                               | ---                        | ---           | 2.301407 | 0.685365 |
| 209563_x_at | calmodulin 1 (phosphorylase kinase, delta)                                                        | CALM1                      | 801           | 2.301142 | 0.685365 |
| 215027_at   | hypothetical protein HSU79275                                                                     | HSU79275                   | 27105         | 2.298765 | 0.685365 |
| 205184_at   | guanine nucleotide binding protein (G protein), gamma 4                                           | GNG4                       | 2786          | 2.297879 | 0.685365 |
| 207731_at   | ---                                                                                               | ---                        | ---           | 2.297251 | 0.685365 |
| 203671_at   | thiopurine S-methyltransferase                                                                    | TPMT                       | 7172          | 2.296889 | 0.685365 |
| 210383_at   | sodium channel, voltage-gated, type I, alpha subunit                                              | SCN1A                      | 6323          | 2.296578 | 0.685365 |
| 213376_at   | zinc finger and BTB domain containing 1                                                           | ZBTB1                      | 22890         | 2.296177 | 0.685365 |
| 201498_at   | ubiquitin specific peptidase 7 (herpes virus-associated)                                          | USP7                       | 7874          | 2.295342 | 0.685365 |
| 214184_at   | neuropeptide FF-amide peptide precursor                                                           | NPFF                       | 8620          | 2.295087 | 0.685365 |
| 212865_s_at | collagen, type XIV, alpha 1 (undulin)                                                             | COL14A1                    | 7373          | 2.294995 | 0.685365 |
| 203484_at   | Sec61 gamma subunit                                                                               | SEC61G                     | 23480         | 2.294769 | 0.685365 |
| 202478_at   | tribbles homolog 2 (Drosophila)                                                                   | TRIB2                      | 28951         | 2.294619 | 0.685365 |
| 216243_s_at | interleukin 1 receptor antagonist                                                                 | IL1RN                      | 3557          | 2.294207 | 0.685365 |
| 220780_at   | phospholipase A2, group III                                                                       | PLA2G3                     | 50487         | 2.292886 | 0.685365 |
| 219406_at   | chromosome 1 open reading frame 50                                                                | C1orf50                    | 79078         | 2.292572 | 0.685365 |
| 209602_s_at | GATA binding protein 3                                                                            | GATA3                      | 2625          | 2.292342 | 0.685365 |
| 205075_at   | serpin peptidase inhibitor, clade F (alpha-2 antiplasmin, pigment epithelium derived factor), mem | SERPINF2                   | 5345          | 2.291389 | 0.685365 |
| 220389_at   | coiled-coil domain containing 81                                                                  | CCDC81                     | 60494         | 2.291318 | 0.685365 |
| 213312_at   | chromosome 6 open reading frame 162                                                               | C6orf162                   | 57150         | 2.290579 | 0.685365 |
| 217359_s_at | neural cell adhesion molecule 1                                                                   | NCAM1                      | 4684          | 2.288542 | 0.685365 |
| 222088_s_at | solute carrier family 2 (facilitated glucose transporter), member 3                               | SLC2A3                     | 6515          | 2.287054 | 0.685365 |
| 202481_at   | dehydrogenase/reductase (SDR family) member 3                                                     | DHRS3                      | 9249          | 2.286618 | 0.685365 |
| 214412_at   | H2A histone family, member B3 /// H2A histone family, member B1                                   | H2AFB1 /// H2A             | 474382 /// 83 | 2.28626  | 0.685365 |
| 203904_x_at | CD82 molecule                                                                                     | CD82                       | 3732          | 2.285981 | 0.685365 |
| 222216_s_at | mitochondrial ribosomal protein L17                                                               | MRPL17                     | 63875         | 2.285753 | 0.685365 |

Supplementary Table 5: Jurakt cells stimulated with PD-1/CD3/CD28 vs. CD3/CD28

|        |    |                                                                                                                          |                             |        |          |          |
|--------|----|--------------------------------------------------------------------------------------------------------------------------|-----------------------------|--------|----------|----------|
| 219465 | at | apolipoprotein A-II                                                                                                      | APOA2                       | 336    | 2.285733 | 0.685365 |
| 217069 | at | myeloid/lymphoid or mixed-lineage leukemia 4                                                                             | MLL4                        | 9757   | 2.284943 | 0.685365 |
| 215919 | s  | mitochondrial ribosomal protein S11                                                                                      | MRPS11                      | 64963  | 2.284846 | 0.685365 |
| 216686 | at | Similar to protein immuno-reactive with anti-PTH polyclonal antibodies                                                   | FLJ40330                    | 645784 | 2.284382 | 0.685365 |
| 219879 | s  | chromosome 17 open reading frame 53                                                                                      | C17orf53                    | 78995  | 2.281608 | 0.685365 |
| 209672 | s  | hypothetical protein FLJ20323                                                                                            | FLJ20323                    | 54468  | 2.279025 | 0.685365 |
| 221954 | at | Chromosome 20 open reading frame 111                                                                                     | C20orf111                   | 51526  | 2.278848 | 0.685365 |
| 214997 | at | Golgi autoantigen, golgin subfamily a. 1                                                                                 | GOLGA1                      | 2800   | 2.278316 | 0.685365 |
| 210352 | at | bromodomain containing 8                                                                                                 | BRD8                        | 10902  | 2.277381 | 0.685365 |
| 208673 | s  | splicing factor, arginine/serine-rich 3                                                                                  | SFRS3                       | 6428   | 2.27637  | 0.685365 |
| 217438 | at | MRNA, clone:RES4-16                                                                                                      | ---                         | ---    | 2.274527 | 0.685365 |
| 220864 | s  | NADH dehydrogenase (ubiquinone) 1 alpha subcomplex, 13                                                                   | NDUFA13                     | 51079  | 2.274215 | 0.685365 |
| 206520 | x  | sialic acid binding Ig-like lectin 6                                                                                     | SIGLEC6                     | 946    | 2.273893 | 0.685365 |
| 218154 | at | gasdermin domain containing 1                                                                                            | GSDMDC1                     | 79792  | 2.273098 | 0.685365 |
| 207663 | x  | G antigen 3                                                                                                              | GAGE3                       | 2575   | 2.272838 | 0.685365 |
| 214740 | at | polymerase (RNA) II (DNA directed) polypeptide J. 13.3kDa pseudogene /// DNA directed RNA pol                            | POLR2J2 /// P 246721 /// 54 | ---    | 2.272776 | 0.685365 |
| 217499 | x  | olfactory receptor, family 7, subfamily E, member 37 pseudogene                                                          | OR7E37P                     | 26636  | 2.272436 | 0.685365 |
| 215279 | at | Clone 23676 mRNA sequence                                                                                                | ---                         | ---    | 2.272429 | 0.685365 |
| 218463 | s  | MUS81 endonuclease homolog (S. cerevisiae)                                                                               | MUS81                       | 80198  | 2.271188 | 0.685365 |
| 221555 | x  | CDC14 cell division cycle 14 homolog B (S. cerevisiae)                                                                   | CDC14B                      | 8555   | 2.270668 | 0.685365 |
| 215554 | at | glycosylphosphatidylinositol specific phospholipase D1                                                                   | GPLD1                       | 2822   | 2.270387 | 0.685365 |
| 209762 | x  | SP110 nuclear body protein                                                                                               | SP110                       | 3431   | 2.269991 | 0.685365 |
| 200622 | x  | calmodulin 3 (phosphorylase kinase, delta)                                                                               | CALM3                       | 808    | 2.269867 | 0.685365 |
| 208024 | s  | DiGeorge syndrome critical region gene 6 /// DiGeorge syndrome critical region gene 6-like                               | DGCR6 /// DG 8214 /// 8535  | ---    | 2.269125 | 0.685365 |
| 217962 | at | nucleolar protein family A, member 3 (H/ACA small nucleolar RNPs)                                                        | NOLA3                       | 55505  | 2.267983 | 0.685365 |
| 202289 | s  | transforming, acidic coiled-coil containing protein 2                                                                    | TACC2                       | 10579  | 2.267559 | 0.685365 |
| 217992 | s  | EF-hand domain family, member D2                                                                                         | EFHD2                       | 79180  | 2.26745  | 0.685365 |
| 221409 | at | olfactory receptor, family 2, subfamily S, member 2                                                                      | OR2S2                       | 56556  | 2.265153 | 0.685365 |
| 210446 | at | GATA binding protein 1 (globin transcription factor 1)                                                                   | GATA1                       | 2623   | 2.265004 | 0.685365 |
| 221996 | s  | Clathrin, light chain (Lcb)                                                                                              | CLTB                        | 1212   | 2.264987 | 0.685365 |
| 210790 | s  | SAR1 gene homolog A (S. cerevisiae)                                                                                      | SARIA                       | 56681  | 2.264337 | 0.685368 |
| 214715 | x  | zinc finger protein 160                                                                                                  | ZNF160                      | 90338  | 2.264107 | 0.685368 |
| 209531 | at | glutathione transferase zeta 1 (maleylacetoacetate isomerase)                                                            | GSTZ1                       | 2954   | 2.263808 | 0.685368 |
| 214004 | s  | vestigial like 4 (Drosophila)                                                                                            | VGLL4                       | 9686   | 2.262271 | 0.685408 |
| 220309 | at | tetratricopeptide repeat domain 22                                                                                       | TTC22                       | 55001  | 2.261792 | 0.685408 |
| 218291 | at | mitogen-activated protein-binding protein-interacting protein                                                            | MAPPBP                      | 28956  | 2.260532 | 0.685408 |
| 211638 | at | Similar to Ig heavy chain V-II region ARH-77 precursor                                                                   | LOC652128                   | 652128 | 2.2605   | 0.685408 |
| 202323 | s  | acyl-Coenzyme A binding domain containing 3                                                                              | ACBD3                       | 64746  | 2.254929 | 0.686542 |
| 213955 | at | myozenin 3                                                                                                               | MYOZ3                       | 91977  | 2.254523 | 0.686542 |
| 201370 | s  | cullin 3                                                                                                                 | CUL3                        | 8452   | 2.253869 | 0.686542 |
| 207503 | at | t-complex 10 (mouse)                                                                                                     | TCP10                       | 6953   | 2.253314 | 0.686542 |
| 217267 | s  | RAB7A, member RAS oncogene family                                                                                        | RAB7A                       | 7879   | 2.253126 | 0.686542 |
| 208133 | at | replication factor C (activator 1) 1, 145kDa                                                                             | RFC1                        | 5981   | 2.251193 | 0.686542 |
| 221701 | s  | stimulated by retinoic acid gene 6 homolog (mouse)                                                                       | STRA6                       | 64220  | 2.249169 | 0.686542 |
| 202869 | at | 2',5'-oligoadenylate synthetase 1, 40/46kDa                                                                              | OAS1                        | 4938   | 2.248862 | 0.686542 |
| 222381 | at | Programmed cell death 6 /// CDNA FLJ37304 fis. clone BRAMY2016070                                                        | PDCE6                       | 10016  | 2.248641 | 0.686542 |
| 208604 | s  | homeobox A3                                                                                                              | HOXA3                       | 3200   | 2.248318 | 0.686542 |
| 208032 | s  | glutamate receptor, ionotropic, AMPA 3                                                                                   | GRIA3                       | 2892   | 2.247864 | 0.686542 |
| 209696 | at | fructose-1,6-bisphosphatase 1                                                                                            | FBP1                        | 2203   | 2.247086 | 0.686542 |
| 206277 | at | purinergic receptor P2Y, G-protein coupled, 2                                                                            | P2RY2                       | 5029   | 2.246319 | 0.686542 |
| 213015 | at | ARTC1 mRNA, complete sequence                                                                                            | ---                         | ---    | 2.245347 | 0.686542 |
| 206915 | at | NK2 homeobox 2                                                                                                           | NKX2-2                      | 4821   | 2.245256 | 0.686542 |
| 204129 | at | B-cell CLL/lymphoma 9                                                                                                    | BCL9                        | 607    | 2.244416 | 0.686542 |
| 219358 | s  | centaurin, alpha 2                                                                                                       | CENTA2                      | 55803  | 2.24281  | 0.686542 |
| 200923 | at | lectin, galactoside-binding, soluble, 3 binding protein                                                                  | LGALS3BP                    | 3959   | 2.241452 | 0.686542 |
| 208333 | at | LIM homeobox 5                                                                                                           | LHX5                        | 64211  | 2.240645 | 0.686542 |
| 215377 | at | C-terminal binding protein 2                                                                                             | CTBP2                       | 1488   | 2.238911 | 0.686542 |
| 221566 | s  | nucleolar protein 3 (apoptosis repressor with CARD domain)                                                               | NOL3                        | 8996   | 2.23834  | 0.686542 |
| 216494 | at | similar to insulin-like growth factor 2 mRNA binding protein 3 /// similar to IGF-II mRNA-binding                        | LOC645468 // 645468 /// 65  | ---    | 2.23657  | 0.686542 |
| 204235 | s  | GULP, engulfment adaptor PTB domain containing 1                                                                         | GULP1                       | 51454  | 2.23571  | 0.686542 |
| 216450 | x  | heat shock protein 90kDa beta (Grp94), member 1                                                                          | HSP90B1                     | 7184   | 2.23556  | 0.686542 |
| 201028 | s  | CD99 molecule                                                                                                            | CD99                        | 4267   | 2.233166 | 0.686542 |
| 207847 | s  | mucin 1, cell surface associated                                                                                         | MUC1                        | 4582   | 2.232621 | 0.686542 |
| 211008 | s  | ubiquitin-conjugating enzyme E2I (UBC9 homolog, yeast)                                                                   | UBE2I                       | 7329   | 2.231888 | 0.686542 |
| 215961 | at | coagulation factor XII (Hageman factor)                                                                                  | F12                         | 2161   | 2.231611 | 0.686542 |
| 202952 | s  | ADAM metallopeptidase domain 12 (meltrin alpha)                                                                          | ADAM12                      | 8038   | 2.231472 | 0.686542 |
| 203486 | s  | armadillo repeat containing 8                                                                                            | ARMC8                       | 25852  | 2.22897  | 0.686542 |
| 213587 | s  | ATPase, H+ transporting V0 subunit e2                                                                                    | ATP6VOE2                    | 155066 | 2.228641 | 0.686542 |
| 206542 | s  | SWI/SNF related, matrix associated, actin dependent regulator of chromatin, subfamily a, member 2                        | SMARCA2                     | 6595   | 2.226959 | 0.686542 |
| 201871 | s  | SAPK substrate protein 1                                                                                                 | LOC51035                    | 51035  | 2.226203 | 0.686542 |
| 218654 | s  | mitochondrial ribosomal protein S33                                                                                      | MRPS33                      | 51650  | 2.225808 | 0.686542 |
| 212634 | at | KIAA0776                                                                                                                 | KIAA0776                    | 23376  | 2.225537 | 0.686542 |
| 207279 | s  | nebulin                                                                                                                  | NEBL                        | 10529  | 2.224584 | 0.686542 |
| 210756 | s  | Notch homolog 2 (Drosophila)                                                                                             | NOTCH2                      | 4853   | 2.224404 | 0.686542 |
| 207027 | at | HGF activator                                                                                                            | HGFAC                       | 3083   | 2.224334 | 0.686542 |
| 206208 | at | carbonic anhydrase IV                                                                                                    | CA4                         | 762    | 2.223236 | 0.686542 |
| 214040 | s  | gelsolin (amyloidosis, Finnish type)                                                                                     | GSN                         | 2934   | 2.223026 | 0.686542 |
| 201400 | at | proteasome (prosome, macropain) subunit, beta type, 3                                                                    | PSMB3                       | 5691   | 2.221302 | 0.686542 |
| 218540 | at | thiamine triphosphatase                                                                                                  | THTPA                       | 79178  | 2.221296 | 0.686542 |
| 210461 | s  | actin binding LIM protein 1                                                                                              | ABLIM1                      | 3983   | 2.221034 | 0.686542 |
| 213296 | at | RER1 retention in endoplasmic reticulum 1 homolog (S. cerevisiae)                                                        | RER1                        | 11079  | 2.220332 | 0.686542 |
| 213456 | at | sclerostin domain containing 1                                                                                           | SOSTDC1                     | 25928  | 2.218429 | 0.686542 |
| 219834 | at | amyotrophic lateral sclerosis 2 (juvenile) chromosome region, candidate 8                                                | ALS2CR8                     | 79800  | 2.216558 | 0.686542 |
| 205965 | at | basic leucine zipper transcription factor, ATF-like                                                                      | BATF                        | 10538  | 2.216441 | 0.686542 |
| 203021 | at | secretory leukocyte peptidase inhibitor                                                                                  | SLPI                        | 6590   | 2.21626  | 0.686542 |
| 208810 | at | DnaJ (Hsp40) homolog, subfamily B, member 6 /// similar to DnaJ (Hsp40) homolog, subfamily B;DNAJB6 /// LC 10049 /// 387 | ---                         | ---    | 2.215277 | 0.686542 |

Supplementary Table 5: Jurakt cells stimulated with PD-1/CD3/CD28 vs. CD3/CD28

|             |                                                                                                        |                            |        |          |          |
|-------------|--------------------------------------------------------------------------------------------------------|----------------------------|--------|----------|----------|
| 209716_at   | colony stimulating factor 1 (macrophage)                                                               | CSF1                       | 1435   | 2.21252  | 0.686542 |
| 215224_at   | ribosomal protein L23                                                                                  | RPL23                      | 9349   | 2.21125  | 0.686542 |
| 219910_at   | FIC domain containing                                                                                  | FICD                       | 11153  | 2.210662 | 0.686542 |
| 206281_at   | adenylate cyclase activating polypeptide 1 (pituitary)                                                 | ADCYAP1                    | 116    | 2.210606 | 0.686542 |
| 205007_s_at | calcium and integrin binding family member 2                                                           | CI2B2                      | 10518  | 2.210098 | 0.686542 |
| 204786_s_at | interferon (alpha, beta and omega) receptor 2                                                          | IFNAR2                     | 3455   | 2.209646 | 0.686542 |
| 201908_at   | dishevelled, dsh homolog 3 (Drosophila)                                                                | DVL3                       | 1857   | 2.209346 | 0.686542 |
| 222371_at   | MRNA; cDNA DKFZp686B1142 (from clone DKFZp686B1142)                                                    | ---                        | ---    | 2.20858  | 0.686542 |
| 202452_at   | zer-1 homolog (C. elegans)                                                                             | ZER1                       | 10444  | 2.208358 | 0.686542 |
| 222255_at   | periaxin                                                                                               | PRX                        | 57716  | 2.207523 | 0.686542 |
| 206386_at   | serpin peptidase inhibitor, clade A (alpha-1 antiproteinase, antitrypsin), member 7                    | SERPINA7                   | 6906   | 2.207396 | 0.686542 |
| 202004_x_at | succinate dehydrogenase complex, subunit C, integral membrane protein, 15kDa                           | SDHC                       | 6391   | 2.206949 | 0.686542 |
| 204428_s_at | lecithin-cholesterol acyltransferase                                                                   | LCAT                       | 3931   | 2.206919 | 0.686542 |
| 202596_at   | endosulfine alpha                                                                                      | ENSA                       | 2029   | 2.206692 | 0.686542 |
| 210138_at   | regulator of G-protein signaling 20                                                                    | RGS20                      | 8601   | 2.20624  | 0.686542 |
| 203700_s_at | deiodinase, iodothyronine, type II                                                                     | DIO2                       | 1734   | 2.205741 | 0.686542 |
| 216960_s_at | zinc finger protein 133                                                                                | ZNF133                     | 7692   | 2.2054   | 0.686542 |
| 205006_s_at | N-myristoyltransferase 2                                                                               | NMT2                       | 9397   | 2.204788 | 0.686542 |
| 218994_s_at | stromal antigen 3-like 4                                                                               | STAG3L4                    | 64940  | 2.201562 | 0.686542 |
| 221484_at   | UDP-Gal:betaGlcNAc beta 1,4- galactosyltransferase, polypeptide 5                                      | B4GALT5                    | 9334   | 2.200931 | 0.686542 |
| 218311_at   | mitogen-activated protein kinase kinase kinase 3                                                       | MAP4K3                     | 8491   | 2.199441 | 0.686542 |
| 217484_at   | complement component (3b/4b) receptor 1 (Knops blood group)                                            | CR1                        | 1378   | 2.199143 | 0.686542 |
| 201296_s_at | WD repeat and SOCS box-containing 1                                                                    | WSB1                       | 26118  | 2.197079 | 0.686542 |
| 219557_s_at | nuclear receptor interacting protein 3                                                                 | NRIP3                      | 56675  | 2.195917 | 0.686542 |
| 200925_at   | cytochrome c oxidase subunit VIa polypeptide 1                                                         | COX6A1                     | 1337   | 2.195285 | 0.686542 |
| 213327_s_at | ubiquitin specific peptidase 12                                                                        | USP12                      | 219333 | 2.195071 | 0.686542 |
| 210972_x_at | T cell receptor alpha locus /// T cell receptor delta variable 2 /// T cell receptor alpha variable 20 | TRA@ /// TRA 28517 /// 286 | ---    | 2.195039 | 0.686542 |
| 218773_s_at | methionine sulfoxide reductase B2                                                                      | MSRB2                      | 22921  | 2.194751 | 0.686542 |
| 209441_at   | Rho-related BTB domain containing 2                                                                    | RHOBTB2                    | 23221  | 2.19239  | 0.686542 |
| 218429_s_at | hypothetical protein FLJ11286                                                                          | FLJ11286                   | 55337  | 2.191984 | 0.686542 |
| 208475_at   | FERM domain containing 4A                                                                              | FRMD4A                     | 55691  | 2.190816 | 0.686542 |
| 221727_at   | ---                                                                                                    | ---                        | ---    | 2.188555 | 0.686542 |
| 204179_at   | myoglobin                                                                                              | MB                         | 4151   | 2.188163 | 0.686542 |
| 213644_at   | coiled-coil domain containing 46                                                                       | CCDC46                     | 201134 | 2.186955 | 0.686542 |
| 217536_x_at | Transcribed locus                                                                                      | ---                        | ---    | 2.1846   | 0.686542 |
| 221994_at   | PDZ and LIM domain 5                                                                                   | PDLIM5                     | 10611  | 2.184223 | 0.686542 |
| 207574_s_at | growth arrest and DNA-damage-inducible, beta                                                           | GADD45B                    | 4616   | 2.183148 | 0.686542 |
| 210213_s_at | eukaryotic translation initiation factor 6                                                             | EIF6                       | 3692   | 2.182961 | 0.686542 |
| 207643_s_at | tumor necrosis factor receptor superfamily, member 1A                                                  | TNFRSF1A                   | 7132   | 2.182931 | 0.686542 |
| 203254_s_at | talin 1                                                                                                | TLN1                       | 7094   | 2.182096 | 0.686542 |
| 211769_x_at | serine incorporator 3                                                                                  | SERINC3                    | 10955  | 2.181857 | 0.686542 |
| 209527_at   | exosome component 2                                                                                    | EXOSC2                     | 23404  | 2.181689 | 0.686542 |
| 200700_s_at | KDEL (Lys-Asp-Glu-Leu) endoplasmic reticulum protein retention receptor 2                              | KDELR2                     | 11014  | 2.180996 | 0.686542 |
| 208317_at   | xylulokinase homolog (H. influenzae)                                                                   | XYLB                       | 9942   | 2.179615 | 0.686542 |
| 200921_s_at | B-cell translocation gene 1, anti-proliferative                                                        | BTG1                       | 694    | 2.179412 | 0.686542 |
| 203692_s_at | E2F transcription factor 3                                                                             | E2F3                       | 1871   | 2.179221 | 0.686542 |
| 213252_at   | SH3 and PX domains 2A                                                                                  | SH3PXD2A                   | 9644   | 2.179136 | 0.686542 |
| 213547_at   | cullin-associated and neddylation-dissociated 2 (putative)                                             | CAND2                      | 23066  | 2.178278 | 0.686542 |
| 219693_at   | 1-acylglycerol-3-phosphate O-acyltransferase 4 (lysophosphatidic acid acyltransferase, delta)          | AGPAT4                     | 56895  | 2.177822 | 0.686542 |
| 213822_s_at | ubiquitin protein ligase E3B                                                                           | UBE3B                      | 89910  | 2.17689  | 0.686542 |
| 219616_at   | acyl-CoA synthetase short-chain family member 3                                                        | ACSS3                      | 79611  | 2.176475 | 0.686542 |
| 209066_x_at | ubiquinol-cytochrome c reductase binding protein                                                       | UQCRB                      | 7381   | 2.175597 | 0.686542 |
| 203300_x_at | adaptor-related protein complex 1, sigma 2 subunit                                                     | AP1S2                      | 8905   | 2.175503 | 0.686542 |
| 208829_at   | TAP binding protein (tapasin)                                                                          | TAPBP                      | 6892   | 2.174176 | 0.686542 |
| 218628_at   | coiled-coil domain containing 53                                                                       | CCDC53                     | 51019  | 2.173592 | 0.686542 |
| 201846_s_at | RING1 and YY1 binding protein                                                                          | RYBP                       | 23429  | 2.173463 | 0.686542 |
| 215796_at   | T-cell receptor active alpha-chain V-region (V-J-C) mRNA, partial cds, clone AG212                     | ---                        | ---    | 2.173287 | 0.686542 |
| 206433_s_at | sparc/osteonectin, cwcv and kazal-like domains proteoglycan (testican) 3                               | SPOCK3                     | 50859  | 2.173097 | 0.686542 |
| 220982_s_at | sperm acrosome associated 1                                                                            | SPACA1                     | 81833  | 2.170379 | 0.686542 |
| 210633_x_at | keratin 10 (epidermolytic hyperkeratosis; keratosis palmaris et plantaris)                             | KRT10                      | 3858   | 2.169077 | 0.686542 |
| 210038_at   | protein kinase C, theta                                                                                | PRKCQ                      | 5588   | 2.168467 | 0.686542 |
| 220449_at   | hypothetical protein MGC5566                                                                           | MGC5566                    | 79015  | 2.168114 | 0.686542 |
| 203326_x_at | ---                                                                                                    | ---                        | ---    | 2.167762 | 0.686542 |
| 202864_s_at | SP100 nuclear antigen                                                                                  | SP100                      | 6672   | 2.167579 | 0.686542 |
| 217721_at   | Full-length cDNA clone CS0DB003YD12 of Neuroblastoma Cot 10-normalized of Homo sapiens (h)             | ---                        | ---    | 2.164745 | 0.686542 |
| 203176_s_at | transcription factor A, mitochondrial                                                                  | TFAM                       | 7019   | 2.164343 | 0.686542 |
| 203983_at   | translin-associated factor X                                                                           | TSNAX                      | 7257   | 2.164018 | 0.686542 |
| 207588_at   | myelin transcription factor 2                                                                          | MYT2                       | 8827   | 2.16357  | 0.686542 |
| 220747_at   | HSPC072 protein                                                                                        | HSPC072                    | 29075  | 2.163561 | 0.686542 |
| 213669_at   | FCH domain only 1                                                                                      | FCHO1                      | 23149  | 2.163116 | 0.686542 |
| 217396_at   | MRNA; cDNA DKFZp434M0317 (from clone DKFZp434M0317)                                                    | ---                        | ---    | 2.162694 | 0.686542 |
| 202909_at   | EPM2A (laforin) interacting protein 1                                                                  | EPM2AIP1                   | 9852   | 2.162674 | 0.686542 |
| 201095_at   | death-associated protein                                                                               | DAP                        | 1611   | 2.159332 | 0.686542 |
| 218288_s_at | coiled-coil domain containing 90B                                                                      | CCDC90B                    | 60492  | 2.1586   | 0.686542 |
| 220698_at   | hypothetical protein MGC4294                                                                           | MGC4294                    | 79160  | 2.15846  | 0.686542 |
| 220565_at   | chemokine (C-C motif) receptor 10                                                                      | CCR10                      | 2826   | 2.158248 | 0.686542 |
| 214851_at   | hepatocyte nuclear factor 4, alpha                                                                     | HNF4A                      | 3172   | 2.157853 | 0.686542 |
| 207008_at   | interleukin 8 receptor, beta                                                                           | IL8RB                      | 3579   | 2.156955 | 0.686542 |
| 218029_at   | family with sequence similarity 65, member A                                                           | FAM65A                     | 79567  | 2.156528 | 0.686542 |
| 202000_at   | NADH dehydrogenase (ubiquinone) 1 alpha subcomplex, 6, 14kDa                                           | NDUFA6                     | 4700   | 2.156429 | 0.686542 |
| 202710_at   | blocked early in transport 1 homolog (S. cerevisiae)                                                   | BET1                       | 10282  | 2.155901 | 0.686542 |
| 207100_s_at | vesicle-associated membrane protein 1 (synaptobrevin 1)                                                | VAMP1                      | 6843   | 2.155753 | 0.686542 |
| 220091_at   | solute carrier family 2 (facilitated glucose transporter), member 6                                    | SLC2A6                     | 11182  | 2.155729 | 0.686542 |
| 221113_s_at | wingless-type MMTV integration site family, member 16                                                  | WNT16                      | 51384  | 2.154654 | 0.686542 |
| 208864_s_at | thioredoxin                                                                                            | TXN                        | 7295   | 2.154394 | 0.686542 |
| 214980_at   | Ubiquitin protein ligase E3A (human papilloma virus E6-associated protein, Angelman syndrome)          | UBE3A                      | 7337   | 2.153301 | 0.686542 |

Supplementary Table 5: Jurakt cells stimulated with PD-1/CD3/CD28 vs. CD3/CD28

|             |                                                                                                        |                             |        |          |          |
|-------------|--------------------------------------------------------------------------------------------------------|-----------------------------|--------|----------|----------|
| 203549_s_at | lipoprotein lipase                                                                                     | LPL                         | 4023   | 2.152699 | 0.686542 |
| 209788_s_at | endoplasmic reticulum aminopeptidase 1                                                                 | ERAP1                       | 51752  | 2.151776 | 0.686542 |
| 210993_s_at | SMAD family member 1                                                                                   | SMAD1                       | 4086   | 2.151288 | 0.686542 |
| 210874_s_at | N-acetyltransferase 6                                                                                  | NAT6                        | 24142  | 2.150985 | 0.686542 |
| 208926_at   | sialidase 1 (lysosomal sialidase)                                                                      | NEU1                        | 4758   | 2.150867 | 0.686542 |
| 220502_s_at | solute carrier family 13 (sodium/sulfate symporters), member 1                                         | SLC13A1                     | 6561   | 2.150679 | 0.686542 |
| 204771_s_at | transcription termination factor, RNA polymerase I                                                     | TTF1                        | 7270   | 2.150614 | 0.686542 |
| 212188_at   | potassium channel tetramerisation domain containing 12                                                 | KCTD12                      | 115207 | 2.15002  | 0.686542 |
| 215784_at   | CD1e molecule                                                                                          | CD1E                        | 913    | 2.149881 | 0.686542 |
| 217502_at   | interferon-induced protein with tetratricopeptide repeats 2                                            | IFIT2                       | 3433   | 2.149733 | 0.686542 |
| 201119_s_at | cytochrome c oxidase subunit 8A (ubiquitous)                                                           | COX8A                       | 1351   | 2.146657 | 0.686542 |
| 213940_s_at | formin binding protein 1                                                                               | FNBP1                       | 23048  | 2.145019 | 0.686542 |
| 212082_s_at | myosin, light chain 6, alkali, smooth muscle and non-muscle                                            | MYL6                        | 4637   | 2.144227 | 0.686542 |
| 205939_at   | cytochrome P450, family 3, subfamily A, polypeptide 7                                                  | CYP3A7                      | 1551   | 2.144084 | 0.686542 |
| 208278_s_at | ---                                                                                                    | ---                         | ---    | 2.144047 | 0.686542 |
| 213114_at   | ---                                                                                                    | ---                         | ---    | 2.142667 | 0.686542 |
| 218010_x_at | chromosome 20 open reading frame 149                                                                   | C20orf149                   | 79144  | 2.142565 | 0.686542 |
| 212081_x_at | HLA-B associated transcript 2                                                                          | BAT2                        | 7916   | 2.141804 | 0.686542 |
| 220122_at   | multiple C2 domains, transmembrane 1                                                                   | MCTP1                       | 79772  | 2.140819 | 0.686542 |
| 213620_s_at | intercellular adhesion molecule 2                                                                      | ICAM2                       | 3384   | 2.139908 | 0.686542 |
| 216815_at   | ---                                                                                                    | ---                         | ---    | 2.139472 | 0.686542 |
| 217998_at   | pleckstrin homology-like domain, family A, member 1 /// hypothetical LOC652993                         | LOC652993 /// 22822 /// 652 | ---    | 2.139247 | 0.686542 |
| 205209_at   | activin A receptor, type IB                                                                            | ACVR1B                      | 91     | 2.138683 | 0.686542 |
| 204090_at   | serine/threonine kinase 19                                                                             | STK19                       | 8859   | 2.138364 | 0.686542 |
| 214567_s_at | chemokine (C motif) ligand 1 /// chemokine (C motif) ligand 2                                          | XCL1 /// XCL2 6375 /// 6846 | ---    | 2.136803 | 0.686542 |
| 214984_at   | PI-3-kinase-related kinase SMG-1 /// hypothetical gene LOC283846 /// hypothetical protein LOC283846    | DKFZp547E08.23049 /// 283   | ---    | 2.136729 | 0.686542 |
| 221905_at   | cylindromatosis (turban tumor syndrome)                                                                | CYLD                        | 1540   | 2.136069 | 0.686542 |
| 220069_at   | tubulin, alpha 8                                                                                       | TUBA8                       | 51807  | 2.135725 | 0.686542 |
| 201758_at   | tumor susceptibility gene 101                                                                          | TSG101                      | 7251   | 2.134177 | 0.686542 |
| 214637_at   | oncostatin M                                                                                           | OSM                         | 5008   | 2.133991 | 0.686542 |
| 221438_s_at | testis expressed 12                                                                                    | TEX12                       | 56158  | 2.13269  | 0.686542 |
| 213995_at   | ATP synthase, H+ transporting, mitochondrial F0 complex, subunit s (factor B)                          | ATP5S                       | 27109  | 2.131809 | 0.686542 |
| 211377_x_at | v-myc myelocytomatosis viral related oncogene, neuroblastoma derived (avian)                           | MYCN                        | 4613   | 2.13178  | 0.686542 |
| 212203_x_at | interferon induced transmembrane protein 3 (1-8U)                                                      | IFITM3                      | 10410  | 2.131392 | 0.686542 |
| 203248_at   | zinc finger protein 24                                                                                 | ZNF24                       | 7572   | 2.131298 | 0.686542 |
| 213241_at   | plexin C1                                                                                              | PLXNC1                      | 10154  | 2.131291 | 0.686542 |
| 221613_s_at | zinc finger, AN1-type domain 6                                                                         | ZFAND6                      | 54469  | 2.13113  | 0.686542 |
| 200751_s_at | heterogeneous nuclear ribonucleoprotein C (C1/C2)                                                      | HNRNPC                      | 3183   | 2.130673 | 0.686542 |
| 212994_at   | THO complex 2                                                                                          | THOC2                       | 57187  | 2.1305   | 0.686542 |
| 206848_at   | homeobox A7                                                                                            | HOXA7                       | 3204   | 2.130443 | 0.686542 |
| 222214_at   | CDNA: FLJ21335 fis. clone COL02546                                                                     | ---                         | ---    | 2.130439 | 0.686542 |
| 206811_at   | adenylate cyclase 8 (brain)                                                                            | ADCY8                       | 114    | 2.129184 | 0.686542 |
| 204345_at   | collagen, type XVI, alpha 1                                                                            | COL16A1                     | 1307   | 2.128767 | 0.686542 |
| 211595_s_at | mitochondrial ribosomal protein S11                                                                    | MRPS11                      | 64963  | 2.128085 | 0.686542 |
| 208184_s_at | transmembrane protein 1                                                                                | TMEM1                       | 7109   | 2.127982 | 0.686542 |
| 211398_at   | fibroblast growth factor receptor 2 (bacteria-expressed kinase, keratinocyte growth factor receptor 2) | FGFR2                       | 2263   | 2.127673 | 0.686542 |
| 219232_s_at | egl nine homolog 3 (C. elegans)                                                                        | EGLN3                       | 112399 | 2.126346 | 0.686542 |
| 214723_x_at | KIAA1641                                                                                               | KIAA1641                    | 57730  | 2.126087 | 0.686542 |
| 209795_at   | CD69 molecule                                                                                          | CD69                        | 969    | 2.12557  | 0.686542 |
| 218921_at   | single immunoglobulin and toll-interleukin 1 receptor (TIR) domain                                     | SIGIRR                      | 59307  | 2.125232 | 0.686542 |
| 212961_x_at | chromosome X open reading frame 40B                                                                    | CXorf40B                    | 541578 | 2.124805 | 0.686542 |
| 220475_at   | solute carrier family 28 (sodium-coupled nucleoside transporter), member 3                             | SLC28A3                     | 64078  | 2.124628 | 0.686542 |
| 202423_at   | MYST histone acetyltransferase (monocytic leukemia) 3                                                  | MYST3                       | 7994   | 2.124453 | 0.686542 |
| 220444_at   | zinc finger protein 557                                                                                | ZNF557                      | 79230  | 2.123719 | 0.686542 |
| 210009_s_at | golgi SNAP receptor complex member 2                                                                   | GOSR2                       | 9570   | 2.123151 | 0.686542 |
| 219771_at   | TBC1 domain family, member 8B (with GRAM domain)                                                       | TBC1D8B                     | 54885  | 2.123065 | 0.686542 |
| 217617_at   | Transcribed locus                                                                                      | ---                         | ---    | 2.122411 | 0.686542 |
| 211944_at   | BAT2 domain containing 1                                                                               | BAT2D1                      | 23215  | 2.121578 | 0.686542 |
| 201825_s_at | saccharopine dehydrogenase (putative)                                                                  | SCCPDH                      | 51097  | 2.121248 | 0.686542 |
| 200736_s_at | glutathione peroxidase 1                                                                               | GPX1                        | 2876   | 2.121183 | 0.686542 |
| 204285_s_at | phorbol-12-myristate-13-acetate-induced protein 1                                                      | PMAIP1                      | 5366   | 2.120986 | 0.686542 |
| 214238_at   | Clone DT1P1B6 mRNA, CAG repeat region                                                                  | ---                         | ---    | 2.119169 | 0.686728 |
| 210057_at   | PI-3-kinase-related kinase SMG-1                                                                       | SMG1                        | 23049  | 2.118753 | 0.686728 |
| 215828_at   | MRNA; cDNA DKFZp547C126 (from clone DKFZp547C126)                                                      | ---                         | ---    | 2.115299 | 0.686728 |
| 200835_s_at | microtubule-associated protein 4                                                                       | MAP4                        | 4134   | 2.114987 | 0.686728 |
| 218609_s_at | nudix (nucleoside diphosphate linked moiety X)-type motif 2                                            | NUDT2                       | 318    | 2.114765 | 0.686728 |
| 201324_at   | epithelial membrane protein 1                                                                          | EMP1                        | 2012   | 2.114244 | 0.686728 |
| 211074_at   | folate receptor 1 (adult)                                                                              | FOLR1                       | 2348   | 2.112322 | 0.686728 |
| 209020_at   | chromosome 20 open reading frame 111                                                                   | C20orf111                   | 51526  | 2.111923 | 0.686728 |
| 218410_s_at | hypothetical protein LOC283871                                                                         | LOC283871                   | 283871 | 2.111561 | 0.686728 |
| 204499_at   | ATP/GTP binding protein 1                                                                              | AGTPBP1                     | 23287  | 2.109359 | 0.686728 |
| 217044_s_at | pleckstrin homology domain containing, family G (with RhoGef domain) member 3                          | PLEKHG3                     | 26030  | 2.108293 | 0.686728 |
| 221081_s_at | DENN/MADD domain containing 2D                                                                         | DENN2D                      | 79961  | 2.107415 | 0.686728 |
| 205418_at   | feline sarcoma oncogene                                                                                | FES                         | 2242   | 2.106854 | 0.686728 |
| 213031_s_at | WD repeat domain 73                                                                                    | WDR73                       | 84942  | 2.106808 | 0.686728 |
| 206602_s_at | homeobox D3                                                                                            | HOXD3                       | 3232   | 2.10626  | 0.686728 |
| 219754_at   | RNA binding motif protein 41                                                                           | RBM41                       | 55285  | 2.105277 | 0.686728 |
| 204334_at   | Kruppel-like factor 7 (ubiquitous)                                                                     | KLF7                        | 8609   | 2.10475  | 0.686728 |
| 221353_at   | olfactory receptor, family 3, subfamily A, member 1                                                    | OR3A1                       | 4994   | 2.104647 | 0.686728 |
| 202759_s_at | A kinase (PRKA) anchor protein 2 /// PALM2-AKAP2                                                       | AKAP2 /// PAL 11217 /// 445 | ---    | 2.104181 | 0.686916 |
| 204292_x_at | serine/threonine kinase 11                                                                             | STK11                       | 6794   | 2.103761 | 0.687055 |
| 52837_at    | KIAA1644 protein                                                                                       | LL22NC03-75f                | 85352  | 2.101906 | 0.687862 |
| 220706_at   | ADAM metalloproteinase with thrombospondin type 1 motif, 7                                             | ADAMTS7                     | 11173  | 2.101165 | 0.687862 |
| 206151_x_at | elastase 3B, pancreatic                                                                                | ELA3B                       | 23436  | 2.099434 | 0.689206 |
| 208749_x_at | flotillin 1                                                                                            | FLOT1                       | 10211  | 2.09818  | 0.689932 |
| 216338_s_at | Yip1 domain family, member 3                                                                           | YIPF3                       | 25844  | 2.097274 | 0.689975 |

Supplementary Table 5: Jurakt cells stimulated with PD-1/CD3/CD28 vs. CD3/CD28

|             |                                                                                                |                             |        |          |          |
|-------------|------------------------------------------------------------------------------------------------|-----------------------------|--------|----------|----------|
| 219672_at   | erythroid associated factor                                                                    | ERAF                        | 51327  | 2.096058 | 0.690746 |
| 210370_s_at | lymphocyte antigen 9                                                                           | LY9                         | 4063   | 2.095188 | 0.690746 |
| 206908_s_at | claudin 11 (oligodendrocyte transmembrane protein)                                             | CLDN11                      | 5010   | 2.094753 | 0.690746 |
| 214972_at   | Meningioma expressed antigen 5 (hyaluronidase)                                                 | MGEA5                       | 10724  | 2.094738 | 0.690746 |
| 217507_at   | solute carrier family 11 (proton-coupled divalent metal ion transporters), member 1            | SLC11A1                     | 6556   | 2.093673 | 0.690746 |
| 201456_s_at | BUB3 budding uninhibited by benzimidazoles 3 homolog (yeast)                                   | BUB3                        | 9184   | 2.093054 | 0.690746 |
| 204246_x_at | dynactin 3 (p22)                                                                               | DCTN3                       | 11258  | 2.091968 | 0.690746 |
| 214720_x_at | septin 10                                                                                      | 10-Sep                      | 151011 | 2.091112 | 0.690746 |
| 208244_at   | bone morphogenetic protein 3 (osteogenic)                                                      | BMP3                        | 651    | 2.090262 | 0.690746 |
| 213067_at   | myosin, heavy chain 10, non-muscle                                                             | MYH10                       | 4628   | 2.08946  | 0.690746 |
| 206327_s_at | cadherin 15, M-cadherin (myotubule)                                                            | CDH15                       | 1013   | 2.089449 | 0.690746 |
| 216161_at   | Strawberry notch homolog 1 (Drosophila)                                                        | SBNO1                       | 55206  | 2.089148 | 0.690746 |
| 214998_at   | AP2 associated kinase 1                                                                        | AAK1                        | 22848  | 2.087479 | 0.690746 |
| 221567_at   | nucleolar protein 3 (apoptosis repressor with CARD domain)                                     | NOL3                        | 8996   | 2.087247 | 0.690746 |
| 203264_s_at | Cdc42 guanine nucleotide exchange factor (GEF) 9                                               | ARHGEF9                     | 23229  | 2.086567 | 0.690746 |
| 212925_at   | chromosome 19 open reading frame 21                                                            | C19orf21                    | 126353 | 2.08622  | 0.690746 |
| 211144_x_at | T cell receptor gamma constant 2 /// T cell receptor gamma variable 9 /// TCR gamma alternate  | TARP /// TRGC445347 /// 69  | 69     | 2.085175 | 0.690746 |
| 210610_at   | carcinoembryonic antigen-related cell adhesion molecule 1 (biliary glycoprotein)               | CEACAM1                     | 634    | 2.08344  | 0.690746 |
| 221377_s_at | recombination signal binding protein for immunoglobulin kappa J region-like                    | RBPJL                       | 11317  | 2.083155 | 0.690746 |
| 211919_s_at | chemokine (C-X-C motif) receptor 4                                                             | CXCR4                       | 7852   | 2.082936 | 0.690746 |
| 214544_s_at | synaptosomal-associated protein, 23kDa                                                         | SNAP23                      | 8773   | 2.082393 | 0.690746 |
| 221442_at   | melanocortin 3 receptor                                                                        | MC3R                        | 4159   | 2.081525 | 0.690746 |
| 210553_x_at | proprotein convertase subtilisin/kexin type 6                                                  | PCSK6                       | 5046   | 2.080664 | 0.690746 |
| 216315_x_at | ubiquitin-conjugating enzyme E2 variant 1 /// TMEM189-UBE2V1 /// similar to ubiquitin-conjugat | LOC730052 /// 387522 /// 73 | 73     | 2.080554 | 0.690746 |
| 202366_at   | acyl-Coenzyme A dehydrogenase, C-2 to C-3 short chain                                          | ACADS                       | 35     | 2.080237 | 0.690746 |
| 209993_at   | ATP-binding cassette, sub-family B (MDR/TAP), member 1                                         | ABCB1                       | 5243   | 2.079959 | 0.690746 |
| 219881_s_at | ---                                                                                            | ---                         | ---    | 2.079153 | 0.690746 |
| 204130_at   | hydroxysteroid (11-beta) dehydrogenase 2                                                       | HSD11B2                     | 3291   | 2.07896  | 0.690746 |
| 209405_s_at | family with sequence similarity 3, member A                                                    | FAM3A                       | 60343  | 2.077668 | 0.690921 |
| 217251_x_at | Isovaleryl Coenzyme A dehydrogenase                                                            | IVD                         | 3712   | 2.076359 | 0.691681 |
| 220670_at   | ---                                                                                            | ---                         | ---    | 2.075213 | 0.691792 |
| 216980_s_at | sialophorin (leukosialin, CD43)                                                                | SPN                         | 6693   | 2.074857 | 0.691792 |
| 219555_s_at | centromere protein N                                                                           | CENPN                       | 55839  | 2.073749 | 0.692639 |
| 212486_s_at | FYN oncogene related to SRC, FGR, YES                                                          | FYN                         | 2534   | 2.071921 | 0.693749 |
| 217732_s_at | integral membrane protein 2B                                                                   | ITM2B                       | 9445   | 2.07024  | 0.693852 |
| 208927_at   | speckle-type POZ protein                                                                       | SPOP                        | 8405   | 2.069217 | 0.693852 |
| 217316_at   | olfactory receptor, family 7, subfamily A, member 10                                           | OR7A10                      | 390892 | 2.069101 | 0.693852 |
| 213311_s_at | transcription factor 25 (basic helix-loop-helix)                                               | TCF25                       | 22980  | 2.068584 | 0.693852 |
| 210221_at   | cholinergic receptor, nicotinic, alpha 3                                                       | CHRNA3                      | 1136   | 2.068357 | 0.693852 |
| 205616_at   | CDNA FLJ25134 fis. clone CBR06934                                                              | ---                         | ---    | 2.067962 | 0.693852 |
| 221998_s_at | vaccinia related kinase 3                                                                      | VRK3                        | 51231  | 2.067095 | 0.694015 |
| 208406_s_at | GRB2-related adaptor protein 2                                                                 | GRAP2                       | 9402   | 2.064681 | 0.694181 |
| 221014_s_at | RAB33B, member RAS oncogene family                                                             | RAB33B                      | 83452  | 2.064485 | 0.694181 |
| 201264_at   | coatamer protein complex, subunit epsilon                                                      | COPE                        | 11316  | 2.062264 | 0.694215 |
| 214011_s_at | hypothetical protein HSPC111                                                                   | HSPC111                     | 51491  | 2.06209  | 0.694215 |
| 218136_s_at | solute carrier family 25, member 37                                                            | SLC25A37                    | 51312  | 2.061799 | 0.694215 |
| 221515_s_at | leucine carboxyl methyltransferase 1                                                           | LCMT1                       | 51451  | 2.060269 | 0.694598 |
| 221797_at   | chromosome 17 open reading frame 90                                                            | C17orf90                    | 339229 | 2.059472 | 0.694598 |
| 206535_at   | solute carrier family 2 (facilitated glucose transporter), member 2                            | SLC2A2                      | 6514   | 2.058244 | 0.694598 |
| 212126_at   | CDNA clone IMAGE:4842353                                                                       | ---                         | ---    | 2.057114 | 0.694598 |
| 208799_at   | proteasome (prosome, macropain) subunit, beta type, 5                                          | PSMB5                       | 5693   | 2.05679  | 0.694598 |
| 214556_at   | somatostatin receptor 4                                                                        | SSTR4                       | 6754   | 2.055841 | 0.694598 |
| 202152_x_at | upstream transcription factor 2, c-fos interacting                                             | USF2                        | 7392   | 2.055689 | 0.694598 |
| 204713_s_at | coagulation factor V (proaccelerin, labile factor)                                             | F5                          | 2153   | 2.055032 | 0.694719 |
| 204440_at   | CD83 molecule                                                                                  | CD83                        | 9308   | 2.054483 | 0.695017 |
| 214296_x_at | chromosome 19 open reading frame 36                                                            | C19orf36                    | 113177 | 2.053631 | 0.695353 |
| 222267_at   | hypothetical protein FLJ14803                                                                  | FLJ14803                    | 84928  | 2.05133  | 0.696075 |
| 205882_x_at | adducin 3 (gamma)                                                                              | ADD3                        | 120    | 2.05089  | 0.696105 |
| 216068_at   | MRNA; cDNA DKFZp434N021 (from clone DKFZp434N021)                                              | ---                         | ---    | 2.050488 | 0.696105 |
| 65630_at    | transmembrane protein 80                                                                       | TMEM80                      | 283232 | 2.049535 | 0.696209 |
| 208102_s_at | pleckstrin and Sec7 domain containing                                                          | PSD                         | 5662   | 2.049406 | 0.696209 |
| 208421_at   | ---                                                                                            | ---                         | ---    | 2.047489 | 0.696209 |
| 208966_x_at | interferon, gamma-inducible protein 16                                                         | IFI16                       | 3428   | 2.047386 | 0.696209 |
| 206420_at   | immunoglobulin superfamily, member 6                                                           | IGSF6                       | 10261  | 2.047226 | 0.696209 |
| 221192_x_at | major facilitator superfamily domain containing 11                                             | MFSD11                      | 79157  | 2.047147 | 0.696209 |
| 374621_at   | splicing factor 3a, subunit 2, 66kDa                                                           | SF3A2                       | 8175   | 2.046665 | 0.696438 |
| 203018_s_at | synovial sarcoma, X breakpoint 2 interacting protein                                           | SSX2IP                      | 117178 | 2.046267 | 0.696577 |
| 205293_x_at | BAI1-associated protein 2                                                                      | BAIAP2                      | 10458  | 2.04534  | 0.696807 |
| 207972_at   | glycine receptor, alpha 1 (startle disease/hyperekplexia)                                      | GLRA1                       | 2741   | 2.044536 | 0.696807 |
| 209633_at   | protein phosphatase 2 (formerly 2A), regulatory subunit B', alpha                              | PPP2R3A                     | 5523   | 2.043908 | 0.696807 |
| 209205_s_at | LIM domain only 4                                                                              | LMO4                        | 8543   | 2.043741 | 0.696807 |
| 207266_x_at | RNA binding motif, single stranded interacting protein 1                                       | RBMS1                       | 5937   | 2.043634 | 0.696807 |
| 213979_s_at | C-terminal binding protein 1                                                                   | CTBP1                       | 1487   | 2.042227 | 0.697458 |
| 214699_x_at | WD repeat domain, phosphoinositide interacting 2                                               | WIP12                       | 26100  | 2.041927 | 0.697492 |
| 210100_s_at | ATP-binding cassette, sub-family A (ABC1), member 2                                            | ABCA2                       | 20     | 2.04132  | 0.697859 |
| 219033_at   | poly (ADP-ribose) polymerase family, member 8                                                  | PARP8                       | 79668  | 2.040884 | 0.697915 |
| 214804_at   | ---                                                                                            | ---                         | ---    | 2.039566 | 0.698889 |
| 205503_at   | protein tyrosine phosphatase, non-receptor type 14                                             | PTPN14                      | 5784   | 2.037962 | 0.700341 |
| 215024_at   | asparagine synthetase /// chromosome 7 open reading frame 28A /// chromosome 7 open readin     | ASNS /// C7orf221960 /// 38 | 38     | 2.035138 | 0.701657 |
| 221957_at   | pyruvate dehydrogenase kinase, isozyme 3                                                       | PKD3                        | 5165   | 2.035038 | 0.701657 |
| 202760_s_at | A kinase (PRKA) anchor protein 2 /// PALM2-AKAP2                                               | AKAP2 /// PAL11217 /// 445  | 445    | 2.033722 | 0.701657 |
| 213432_at   | mucin 5B, oligomeric mucus/gel-forming                                                         | MUC5B                       | 727897 | 2.033377 | 0.701657 |
| 211744_s_at | CD58 molecule                                                                                  | CD58                        | 965    | 2.032573 | 0.701657 |
| 206150_at   | CD27 molecule                                                                                  | CD27                        | 939    | 2.032149 | 0.701657 |
| 220606_s_at | chromosome 17 open reading frame 48                                                            | C17orf48                    | 56985  | 2.031601 | 0.701657 |
| 201435_s_at | eukaryotic translation initiation factor 4E                                                    | EIF4E                       | 1977   | 2.030359 | 0.701657 |

Supplementary Table 5: Jurakt cells stimulated with PD-1/CD3/CD28 vs. CD3/CD28

|             |                                                                                                 |                            |        |           |          |
|-------------|-------------------------------------------------------------------------------------------------|----------------------------|--------|-----------|----------|
| 208478_s_at | BCL2-associated X protein                                                                       | BAX                        | 581    | 2.030295  | 0.701657 |
| 218446_s_at | family with sequence similarity 18, member B                                                    | FAM18B                     | 51030  | 2.03009   | 0.701657 |
| 215492_x_at | pre T-cell antigen receptor alpha                                                               | PTCRA                      | 171558 | 2.030015  | 0.701657 |
| 210796_x_at | sialic acid binding Ig-like lectin 6                                                            | SIGLEC6                    | 946    | 2.029813  | 0.701657 |
| 218285_s_at | 3-hydroxybutyrate dehydrogenase, type 2                                                         | BDH2                       | 56898  | 2.029157  | 0.701657 |
| 218669_at   | RAP2C, member of RAS oncogene family                                                            | RAP2C                      | 57826  | 2.02907   | 0.701657 |
| 201251_at   | pyruvate kinase, muscle                                                                         | PKM2                       | 5315   | 2.028925  | 0.701657 |
| 221553_at   | implantation-associated protein /// similar to implantation-associated protein                  | LOC728866 // 728866 /// 84 |        | 2.027564  | 0.701657 |
| 214906_x_at | hypothetical gene CG018                                                                         | CG018                      | 90634  | 2.027534  | 0.701657 |
| 205893_at   | neurologin 1                                                                                    | NLGN1                      | 22871  | 2.027108  | 0.701657 |
| 207130_at   | zinc finger, MYND-type containing 8                                                             | ZMYND8                     | 23613  | 2.027097  | 0.701657 |
| 212241_at   | glutamate receptor, ionotropic, N-methyl D-aspartate-like 1A /// GRINL1A combined protein /// s | Gcom1 /// GR 145781 /// 33 |        | 2.026624  | 0.701657 |
| 210037_s_at | nitric oxide synthase 2A (inducible, hepatocytes)                                               | NOS2A                      | 4843   | 2.026548  | 0.701657 |
| 206982_at   | crystallin, beta A1                                                                             | CRYBA1                     | 1411   | 2.026499  | 0.701657 |
| 219026_s_at | RAS protein activator like 2                                                                    | RASAL2                     | 9462   | 2.026072  | 0.701657 |
| 219385_at   | SLAM family member 8                                                                            | SLAMF8                     | 56833  | 2.02596   | 0.701657 |
| 205857_at   | solute carrier family 18 (vesicular monoamine), member 2                                        | SLC18A2                    | 6571   | 2.025399  | 0.701657 |
| 212631_at   | Syntaxin 7                                                                                      | STX7                       | 8417   | 2.025176  | 0.701657 |
| 212103_at   | karyopherin alpha 6 (importin alpha 7)                                                          | KPNA6                      | 23633  | 2.025125  | 0.701657 |
| 219538_at   | WD repeat domain 5B                                                                             | WDR5B                      | 54554  | 2.024372  | 0.701657 |
| 218831_s_at | Fc fragment of IgG, receptor, transporter, alpha                                                | FCGRT                      | 2217   | 2.023605  | 0.701657 |
| 216566_at   | Ribosomal protein L14                                                                           | RPL14                      | 9045   | 2.023178  | 0.701657 |
| 211422_at   | transient receptor potential cation channel, subfamily M, member 3                              | TRPM3                      | 80036  | 2.022757  | 0.701657 |
| 219981_x_at | zinc finger protein 587                                                                         | ZNF587                     | 84914  | 2.022097  | 0.701657 |
| 218240_at   | NFKB inhibitor interacting Ras-like 2                                                           | NKIRAS2                    | 28511  | 2.021955  | 0.701657 |
| 216212_s_at | dyskeratosis congenita 1, dyskerin                                                              | DKC1                       | 1736   | 2.021933  | 0.701657 |
| 221145_at   | ---                                                                                             | ---                        | ---    | 2.018788  | 0.701821 |
| 215199_at   | caldesmon 1                                                                                     | CALD1                      | 800    | 2.018632  | 0.701821 |
| 201205_at   | ---                                                                                             | ---                        | ---    | 2.018631  | 0.701821 |
| 200001_at   | calpain, small subunit 1                                                                        | CAPNS1                     | 826    | 2.018556  | 0.701821 |
| 220326_s_at | hypothetical protein FLJ10357                                                                   | FLJ10357                   | 55701  | 2.018222  | 0.701821 |
| 201876_at   | paraoxonase 2                                                                                   | PON2                       | 5445   | 2.017604  | 0.701821 |
| 207034_s_at | GLI-Kruppel family member GLI2                                                                  | GLI2                       | 2736   | 2.017196  | 0.701821 |
| 218708_at   | NTF2-like export factor 1                                                                       | NXT1                       | 29107  | 2.01716   | 0.701821 |
| 221234_s_at | BTB and CNC homology 1, basic leucine zipper transcription factor 2                             | BACH2                      | 60468  | 2.016732  | 0.701821 |
| 203024_s_at | chromosome 5 open reading frame 15                                                              | C5orf15                    | 56951  | 2.016486  | 0.701821 |
| 203590_at   | dynein, cytoplasmic 1, light intermediate chain 2                                               | DYNC1L2                    | 1783   | 2.016396  | 0.701821 |
| 218027_at   | mitochondrial ribosomal protein L15                                                             | MRPL15                     | 29088  | 2.015465  | 0.701821 |
| 216607_s_at | cytochrome P450, family 51, subfamily A, polypeptide 1                                          | CYP51A1                    | 1595   | 2.014472  | 0.701821 |
| 217624_at   | PDGFA associated protein 1                                                                      | PDAP1                      | 11333  | 2.01423   | 0.701821 |
| 217237_at   | Cyristestin 2-like mRNA, partial sequence                                                       | ---                        | ---    | 2.012285  | 0.701821 |
| 219382_at   | SERTA domain containing 3                                                                       | SERTAD3                    | 29946  | 2.012211  | 0.701821 |
| 202173_s_at | vascular endothelial zinc finger 1                                                              | VEZF1                      | 7716   | 2.011852  | 0.701821 |
| 220713_at   | CDNA FLJ12345 fis. clone MAMMA1002294                                                           | ---                        | ---    | 2.011754  | 0.701821 |
| 216495_x_at | Isovaleryl Coenzyme A dehydrogenase                                                             | IVD                        | 3712   | 2.011191  | 0.701821 |
| 201482_at   | quiescin Q6 sulfhydryl oxidase 1                                                                | QSOX1                      | 5768   | 2.011111  | 0.701821 |
| 211210_x_at | SH2 domain protein 1A, Duncan's disease (lymphoproliferative syndrome)                          | SH2D1A                     | 4068   | 2.010776  | 0.701821 |
| 213639_s_at | zinc finger protein 500                                                                         | ZNF500                     | 26048  | 2.009621  | 0.701821 |
| 221896_s_at | HIG1 domain family, member 1A                                                                   | HIGD1A                     | 25994  | 2.00925   | 0.701821 |
| 206967_at   | cyclin T1                                                                                       | CCNT1                      | 904    | 2.008741  | 0.701821 |
| 206506_s_at | suppressor of Ty 3 homolog (S. cerevisiae)                                                      | SUPT3H                     | 8464   | 2.008314  | 0.701821 |
| 209404_s_at | transmembrane emp24 protein transport domain containing 7                                       | TMED7                      | 51014  | 2.008168  | 0.701821 |
| 210427_x_at | annexin A2                                                                                      | ANXA2                      | 302    | 2.008161  | 0.701821 |
| 213315_x_at | chromosome X open reading frame 40A                                                             | CXorf40A                   | 91966  | 2.008044  | 0.701821 |
| 221790_s_at | low density lipoprotein receptor adaptor protein 1                                              | LDLRAP1                    | 26119  | 2.007726  | 0.701821 |
| 214034_at   | endoplasmic reticulum aminopeptidase 1                                                          | ERAP1                      | 51752  | 2.007357  | 0.701821 |
| 208746_x_at | ATP synthase, H+ transporting, mitochondrial F0 complex, subunit G                              | ATP5L                      | 10632  | 2.006394  | 0.701821 |
| 202617_s_at | methyl CpG binding protein 2 (Rett syndrome)                                                    | MECP2                      | 4204   | 2.00608   | 0.701821 |
| 217042_at   | retinol dehydrogenase 11 (all-trans/9-cis/11-cis)                                               | RDH11                      | 51109  | 2.005352  | 0.701821 |
| 212868_x_at | chromosome 12 open reading frame 47                                                             | C12orf47                   | 51275  | 2.005119  | 0.701821 |
| 210107_at   | chloride channel, calcium activated, family member 1                                            | CLCA1                      | 1179   | 2.004572  | 0.701821 |
| 210131_x_at | succinate dehydrogenase complex, subunit C, integral membrane protein, 15kDa                    | SDHC                       | 6391   | 2.003848  | 0.701821 |
| 207143_at   | cyclin-dependent kinase 6                                                                       | CDK6                       | 1021   | 2.002531  | 0.702274 |
| 219806_s_at | chromosome 11 open reading frame 75                                                             | C11orf75                   | 56935  | 2.001108  | 0.703269 |
| 219664_s_at | 2,4-dienoyl CoA reductase 2, peroxisomal                                                        | DECR2                      | 26063  | -2.00043  | 0.703454 |
| 209254_at   | KIAA0265 protein                                                                                | KIAA0265                   | 23008  | -2.000571 | 0.703454 |
| 219934_s_at | sulfotransferase family 1E, estrogen-preferring, member 1                                       | SULT1E1                    | 6783   | -2.001338 | 0.703269 |
| 200064_at   | heat shock protein 90kDa alpha (cytosolic), class B member 1                                    | HSP90AB1                   | 3326   | -2.002673 | 0.702274 |
| 221101_at   | chromosome 14 open reading frame 113                                                            | C14orf113                  | 54792  | -2.003456 | 0.701821 |
| 204305_at   | mitochondrial intermediate peptidase                                                            | MIPEP                      | 4285   | -2.003511 | 0.701821 |
| 209339_at   | seven in absentia homolog 2 (Drosophila)                                                        | SIAH2                      | 6478   | -2.003799 | 0.701821 |
| 201814_at   | TBC1 domain family, member 5                                                                    | TBC1D5                     | 9779   | -2.004175 | 0.701821 |
| 220777_at   | kinesin family member 13A                                                                       | KIF13A                     | 63971  | -2.004408 | 0.701821 |
| 209402_s_at | solute carrier family 12 (potassium/chloride transporters), member 4                            | SLC12A4                    | 6560   | -2.004658 | 0.701821 |
| 209942_x_at | melanoma antigen family A, 3                                                                    | MAGEA3                     | 4102   | -2.004926 | 0.701821 |
| 213334_x_at | UCHL5 interacting protein                                                                       | UCHL5IP                    | 55559  | -2.005561 | 0.701821 |
| 205818_at   | deleted in bladder cancer 1                                                                     | DBC1                       | 1620   | -2.005688 | 0.701821 |
| 201528_at   | replication protein A1, 70kDa                                                                   | RPA1                       | 6117   | -2.006227 | 0.701821 |
| 221923_s_at | nucleophosmin (nucleolar phosphoprotein B23, numatrin)                                          | NPM1                       | 4869   | -2.006951 | 0.701821 |
| 211651_s_at | laminin, beta 1                                                                                 | LAMB1                      | 3912   | -2.007124 | 0.701821 |
| 207756_at   | ---                                                                                             | ---                        | ---    | -2.007216 | 0.701821 |
| 206563_s_at | opiate receptor-like 1                                                                          | OPRL1                      | 4987   | -2.008492 | 0.701821 |
| 202431_s_at | v-myc myelocytomatosis viral oncogene homolog (avian)                                           | MYC                        | 4609   | -2.008501 | 0.701821 |
| 65493_at    | HEAT repeat containing 6                                                                        | HEATR6                     | 63897  | -2.008826 | 0.701821 |
| 213993_at   | spodin 1, extracellular matrix protein                                                          | SPON1                      | 10418  | -2.009684 | 0.701821 |
| 203493_s_at | centrosomal protein 57kDa                                                                       | CEP57                      | 9702   | -2.009696 | 0.701821 |

Supplementary Table 5: Jurakt cells stimulated with PD-1/CD3/CD28 vs. CD3/CD28

|             |                                                                                              |          |       |           |          |
|-------------|----------------------------------------------------------------------------------------------|----------|-------|-----------|----------|
| 222077_s_at | Rac GTPase activating protein 1                                                              | RACGAP1  | 29127 | -2.011196 | 0.701821 |
| 207357_s_at | UDP-N-acetyl-alpha-D-galactosamine:polypeptide N-acetylglucosaminyltransferase 10 (GalNAc    | GALNT10  | 55568 | -2.0116   | 0.701821 |
| 221849_s_at | hypothetical protein BC002926                                                                | LOC90379 | 90379 | -2.011694 | 0.701821 |
| 204101_at   | myotubularin 1                                                                               | MTM1     | 4534  | -2.012369 | 0.701821 |
| 213349_at   | transmembrane and coiled-coil domain family 1                                                | TMCC1    | 23023 | -2.012496 | 0.701821 |
| 216511_s_at | transcription factor 7-like 2 (T-cell specific, HMG-box)                                     | TCF7L2   | 6934  | -2.012646 | 0.701821 |
| 218052_s_at | ATPase type 13A1                                                                             | ATP13A1  | 57130 | -2.012863 | 0.701821 |
| 203196_at   | ATP-binding cassette, sub-family C (CFTR/MRP), member 4                                      | ABCC4    | 10257 | -2.012868 | 0.701821 |
| 207264_at   | KDEL (Lys-Asp-Glu-Leu) endoplasmic reticulum protein retention receptor 3                    | KDELR3   | 11015 | -2.014337 | 0.701821 |
| 38707_r_at  | E2F transcription factor 4, p107/p130-binding                                                | E2F4     | 1874  | -2.0152   | 0.701821 |
| 213014_at   | mitogen-activated protein kinase 8 interacting protein 1                                     | MAPK8IP1 | 9479  | -2.015757 | 0.701821 |
| 218536_at   | MRS2-like, magnesium homeostasis factor (S. cerevisiae)                                      | MRS2L    | 57380 | -2.017258 | 0.701821 |
| 210687_at   | carnitine palmitoyltransferase 1A (liver)                                                    | CPT1A    | 1374  | -2.019357 | 0.701821 |
| 217457_s_at | RAP1, GTP-GDP dissociation stimulator 1                                                      | RAP1GDS1 | 5910  | -2.019452 | 0.701821 |
| 65635_at    | endo-beta-N-acetylglucosaminidase                                                            | FLJ21865 | 64772 | -2.019874 | 0.701821 |
| 206916_x_at | tyrosine aminotransferase                                                                    | TAT      | 6898  | -2.020475 | 0.701821 |
| 217725_x_at | SERPINE1 mRNA binding protein 1                                                              | SERBP1   | 26135 | -2.021433 | 0.701821 |
| 201594_s_at | protein phosphatase 4, regulatory subunit 1                                                  | PPP4R1   | 9989  | -2.022356 | 0.701657 |
| 212738_at   | Rho GTPase activating protein 19                                                             | ARHGAP19 | 84986 | -2.022382 | 0.701657 |
| 202239_at   | poly (ADP-ribose) polymerase family, member 4                                                | PARP4    | 143   | -2.022719 | 0.701657 |
| 206780_at   | glutamate decarboxylase 2 (pancreatic islets and brain, 65kDa)                               | GAD2     | 2572  | -2.02274  | 0.701657 |
| 218663_at   | non-SMC condensin I complex, subunit G                                                       | NCAPG    | 64151 | -2.022795 | 0.701657 |
| 205531_s_at | glutaminase 2 (liver, mitochondrial)                                                         | GLS2     | 27165 | -2.022807 | 0.701657 |
| 212379_at   | phosphoribosylglycinamide formyltransferase, phosphoribosylglycinamide synthetase, phosphori | GART     | 2618  | -2.023628 | 0.701657 |
| 208688_x_at | eukaryotic translation initiation factor 3, subunit B                                        | EIF3B    | 8662  | -2.024641 | 0.701657 |
| 217434_at   | melanocortin 2 receptor (adrenocorticotrophic hormone)                                       | MC2R     | 4158  | -2.02494  | 0.701657 |
| 210541_s_at | tripartite motif-containing 27                                                               | TRIM27   | 5987  | -2.025389 | 0.701657 |
| 208454_s_at | plasma glutamate carboxypeptidase                                                            | PGCP     | 10404 | -2.029082 | 0.701657 |
| 205489_at   | crystallin, mu                                                                               | CRYM     | 1428  | -2.029929 | 0.701657 |
| 211525_s_at | glycoprotein V (platelet)                                                                    | GP5      | 2814  | -2.030884 | 0.701657 |
| 203871_at   | SUMO1/sentrin/SMT3 specific peptidase 3                                                      | SENP3    | 26168 | -2.031191 | 0.701657 |
| 221096_s_at | transmembrane and coiled-coil domains 6                                                      | TMCO6    | 55374 | -2.031825 | 0.701657 |
| 218818_at   | four and a half LIM domains 3                                                                | FHL3     | 2275  | -2.03252  | 0.701657 |
| 206990_at   | tenascin R (restrictin, janusin)                                                             | TNR      | 7143  | -2.033148 | 0.701657 |
| 211865_s_at | fizzy/cell division cycle 20 related 1 (Drosophila)                                          | FZR1     | 51343 | -2.034789 | 0.701657 |
| 214331_at   | Ts translation elongation factor, mitochondrial                                              | TSFM     | 10102 | -2.034896 | 0.701657 |
| 206695_x_at | zinc finger protein 43                                                                       | ZNF43    | 7594  | -2.035761 | 0.701657 |
| 220413_at   | solute carrier family 39 (zinc transporter), member 2                                        | SLC39A2  | 29986 | -2.036782 | 0.701042 |
| 221328_at   | claudin 17                                                                                   | CLDN17   | 26285 | -2.037624 | 0.700417 |
| 202720_at   | testis derived transcript (3 LIM domains)                                                    | TES      | 26136 | -2.040733 | 0.697915 |
| 217370_x_at | fusion (involved in t(12;16) in malignant liposarcoma)                                       | FUS      | 2521  | -2.042745 | 0.697188 |
| 210658_s_at | golgi associated, gamma adaptin ear containing, ARF binding protein 2                        | GGA2     | 23062 | -2.043191 | 0.696995 |
| 209645_s_at | aldehyde dehydrogenase 1 family, member B1                                                   | ALDH1B1  | 219   | -2.044306 | 0.696807 |
| 202386_s_at | KIAA0430                                                                                     | KIAA0430 | 9665  | -2.04456  | 0.696807 |
| 202320_at   | general transcription factor IIIC, polypeptide 1, alpha 220kDa                               | GTF3C1   | 2975  | -2.044952 | 0.696807 |
| 209856_x_at | abl interactor 2                                                                             | ABI2     | 10152 | -2.045973 | 0.696604 |
| 220842_at   | Abelson helper integration site 1                                                            | AH11     | 54806 | -2.047505 | 0.696209 |
| 202396_at   | transcription elongation regulator 1                                                         | TCERG1   | 10915 | -2.048332 | 0.696209 |
| 210228_at   | colony stimulating factor 2 (granulocyte-macrophage)                                         | CSF2     | 1437  | -2.04838  | 0.696209 |
| 219149_x_at | debranching enzyme homolog 1 (S. cerevisiae)                                                 | DBR1     | 51163 | -2.048508 | 0.696209 |
| 205990_s_at | wingless-type MMTV integration site family, member 5A                                        | WNT5A    | 7474  | -2.048627 | 0.696209 |
| 208627_s_at | Y box binding protein 1                                                                      | YBX1     | 4904  | -2.049175 | 0.696209 |
| 218057_x_at | COX4 neighbor                                                                                | COX4NB   | 10328 | -2.050527 | 0.696105 |
| 201736_s_at | membrane-associated ring finger (C3HC4) 6                                                    | 6-Mar    | 10299 | -2.051522 | 0.696075 |
| 215955_x_at | Rho GTPase activating protein 26                                                             | ARHGAP26 | 23092 | -2.05159  | 0.696075 |
| 215106_at   | tetratricopeptide repeat domain 22                                                           | TTC22    | 55001 | -2.051656 | 0.696075 |
| 215980_s_at | immunoglobulin mu binding protein 2                                                          | IGHMBP2  | 3508  | -2.053084 | 0.695353 |
| 203654_s_at | coilin                                                                                       | COIL     | 8161  | -2.053128 | 0.695353 |
| 217127_at   | cystathionase (cystathionine gamma-lyase)                                                    | CTH      | 1491  | -2.05326  | 0.695353 |
| 205393_s_at | CHK1 checkpoint homolog (S. pombe)                                                           | CHEK1    | 1111  | -2.055081 | 0.694719 |
| 209871_s_at | amyloid beta (A4) precursor protein-binding, family A, member 2 (X11-like)                   | APBA2    | 321   | -2.056033 | 0.694598 |
| 209650_s_at | TBC1 domain family, member 22A                                                               | TBC1D22A | 25771 | -2.056161 | 0.694598 |
| 219940_s_at | PCI domain containing 2                                                                      | PCID2    | 55795 | -2.056326 | 0.694598 |
| 212085_at   | solute carrier family 25 (mitochondrial carrier; adenine nucleotide translocator), member 6  | SLC25A6  | 293   | -2.056396 | 0.694598 |
| 212722_s_at | jumonji domain containing 6                                                                  | JMJD6    | 23210 | -2.057826 | 0.694598 |
| 216354_at   | ---                                                                                          | ---      | ---   | -2.057904 | 0.694598 |
| 205129_at   | nucleophosmin/nucleoplamin, 3                                                                | NPM3     | 10360 | -2.05862  | 0.694598 |
| 209138_x_at | Immunoglobulin lambda locus                                                                  | IGL@     | 3535  | -2.058654 | 0.694598 |
| 209823_x_at | major histocompatibility complex, class II, DQ beta 1                                        | HLA-DQB1 | 3119  | -2.058661 | 0.694598 |
| 214096_s_at | serine hydroxymethyltransferase 2 (mitochondrial)                                            | SHMT2    | 6472  | -2.059216 | 0.694598 |
| 37943_at    | zinc finger, FYVE domain containing 26                                                       | ZFYVE26  | 23503 | -2.059572 | 0.694598 |
| 213561_at   | ASF1 anti-silencing function 1 homolog A (S. cerevisiae)                                     | ASF1A    | 25842 | -2.060117 | 0.694598 |
| 219084_at   | nuclear receptor binding SET domain protein 1                                                | NSD1     | 64324 | -2.060804 | 0.694598 |
| 203145_at   | sperm associated antigen 5                                                                   | SPAG5    | 10615 | -2.061519 | 0.694215 |
| 219847_at   | histone deacetylase 11                                                                       | HDAC11   | 79885 | -2.06153  | 0.694215 |
| 202293_at   | stromal antigen 1                                                                            | STAG1    | 10274 | -2.062926 | 0.694181 |
| 201255_x_at | HLA-B associated transcript 3                                                                | BAT3     | 7917  | -2.062969 | 0.694181 |
| 208274_at   | oculomedin                                                                                   | OCLM     | 10896 | -2.063432 | 0.694181 |
| 201146_at   | nuclear factor (erythroid-derived 2)-like 2                                                  | NFE2L2   | 4780  | -2.063551 | 0.694181 |
| 218348_s_at | zinc finger CCCH-type containing 7A                                                          | ZC3H7A   | 29066 | -2.063924 | 0.694181 |
| 211953_s_at | RAN binding protein 5                                                                        | RANBP5   | 3843  | -2.064133 | 0.694181 |
| 203377_s_at | cell division cycle 40 homolog (S. cerevisiae)                                               | CDC40    | 51362 | -2.064164 | 0.694181 |
| 200779_at   | activating transcription factor 4 (tax-responsive enhancer element B67)                      | ATF4     | 468   | -2.064636 | 0.694181 |
| 200749_at   | RAN, member RAS oncogene family                                                              | RAN      | 5901  | -2.065283 | 0.694181 |
| 200992_at   | importin 7                                                                                   | IPO7     | 10527 | -2.066117 | 0.694015 |
| 211019_s_at | lanosterol synthase (2,3-oxidosqualene-lanosterol cyclase)                                   | LSS      | 4047  | -2.066148 | 0.694015 |



Supplementary Table 5: Jurakt cells stimulated with PD-1/CD3/CD28 vs. CD3/CD28

|              |                                                                                                    |                        |        |           |          |
|--------------|----------------------------------------------------------------------------------------------------|------------------------|--------|-----------|----------|
| 40020_at     | cadherin, EGF LAG seven-pass G-type receptor 3 (flamingo homolog, Drosophila)                      | CELSR3                 | 1951   | -2.066292 | 0.694015 |
| 214407_x_at  | glycophorin B (MNS blood group)                                                                    | GYPB                   | 2994   | -2.066496 | 0.694015 |
| 207926_at    | glycoprotein V (platelet)                                                                          | GP5                    | 2814   | -2.067526 | 0.693989 |
| 217760_at    | tripartite motif-containing 44                                                                     | TRIM44                 | 54765  | -2.06793  | 0.693852 |
| 206037_at    | cysteine conjugate-beta lyase; cytoplasmic (glutamine transaminase K, kynurenine aminotransferase) | CCBL1                  | 883    | -2.068385 | 0.693852 |
| 221666_s_at  | PYD and CARD domain containing                                                                     | PYCARD                 | 29108  | -2.068809 | 0.693852 |
| 218878_s_at  | sirtuin (silent mating type information regulation 2 homolog) 1 (S. cerevisiae)                    | SIRT1                  | 23411  | -2.069412 | 0.693852 |
| 212584_at    | aquarius homolog (mouse)                                                                           | AQR                    | 9716   | -2.069802 | 0.693852 |
| 216943_at    | ---                                                                                                | ---                    | ---    | -2.070088 | 0.693852 |
| 218948_at    | glutaminyl-tRNA synthase (glutamine-hydrolyzing)-like 1                                            | QRSL1                  | 55278  | -2.070823 | 0.693852 |
| 201790_s_at  | 7-dehydrocholesterol reductase                                                                     | DHCR7                  | 1717   | -2.07159  | 0.693806 |
| 216784_at    | CDNA: FLJ21769 fis. clone COLF7354                                                                 | ---                    | ---    | -2.07281  | 0.693092 |
| 209622_at    | serine/threonine kinase 16                                                                         | STK16                  | 8576   | -2.07351  | 0.692639 |
| 204423_at    | muskelin 1, intracellular mediator containing kelch motifs                                         | MKLN1                  | 4289   | -2.074993 | 0.691792 |
| 213234_at    | KIAA1467                                                                                           | KIAA1467               | 57613  | -2.075773 | 0.691708 |
| 209109_s_at  | tetraspanin 6                                                                                      | TSPAN6                 | 7105   | -2.07582  | 0.691708 |
| 216633_s_at  | phospholipase C, eta 1                                                                             | PLCH1                  | 23007  | -2.076661 | 0.691657 |
| 206919_at    | ELK4, ETS-domain protein (SRF accessory protein 1)                                                 | ELK4                   | 2005   | -2.077626 | 0.690921 |
| 203863_at    | actinin, alpha 2                                                                                   | ACTN2                  | 88     | -2.077948 | 0.690921 |
| 209442_x_at  | ankyrin 3, node of Ranvier (ankyrin G)                                                             | ANK3                   | 288    | -2.078631 | 0.690746 |
| 219041_s_at  | replication initiator 1                                                                            | REPIN1                 | 29803  | -2.078711 | 0.690746 |
| 203755_at    | BUB1 budding uninhibited by benzimidazoles 1 homolog beta (yeast)                                  | BUB1B                  | 701    | -2.078732 | 0.690746 |
| 208463_at    | gamma-aminobutyric acid (GABA) A receptor, alpha 4                                                 | GABRA4                 | 2557   | -2.078739 | 0.690746 |
| 211643_x_at  | Major histocompatibility complex, class I, C                                                       | HLA-C                  | 3107   | -2.078784 | 0.690746 |
| 215071_s_at  | histone cluster 1, H2ac                                                                            | HIST1H2AC              | 8334   | -2.078902 | 0.690746 |
| 221297_at    | G protein-coupled receptor, family C, group 5, member D                                            | GPRC5D                 | 55507  | -2.07894  | 0.690746 |
| 219224_x_at  | zinc finger protein 408                                                                            | ZNF408                 | 79797  | -2.079864 | 0.690746 |
| 203363_s_at  | KIAA0652                                                                                           | KIAA0652               | 9776   | -2.079902 | 0.690746 |
| 212469_at    | Nipped-B homolog (Drosophila)                                                                      | NIPBL                  | 25836  | -2.081399 | 0.690746 |
| 214306_at    | optic atrophy 1 (autosomal dominant)                                                               | OPA1                   | 4976   | -2.081402 | 0.690746 |
| 214888_at    | calpain 2, (m/II) large subunit                                                                    | CAPN2                  | 824    | -2.08157  | 0.690746 |
| 217761_at    | acireductone dioxygenase 1                                                                         | ADI1                   | 55256  | -2.081683 | 0.690746 |
| 208045_at    | surfactant protein A binding protein                                                               | SPAR                   | 9981   | -2.082129 | 0.690746 |
| 216945_x_at  | PAS domain containing serine/threonine kinase                                                      | PASK                   | 23178  | -2.082178 | 0.690746 |
| 200859_x_at  | filamin A, alpha (actin binding protein 280)                                                       | FLNA                   | 2316   | -2.082903 | 0.690746 |
| 208340_at    | Evolutionarily related interleukin-1beta converting enzyme                                         | ---                    | ---    | -2.083463 | 0.690746 |
| 211015_s_at  | heat shock 70kDa protein 4                                                                         | HSPA4                  | 3308   | -2.083981 | 0.690746 |
| 218080_x_at  | Fas (TNFRSF6) associated factor 1                                                                  | FAF1                   | 11124  | -2.084302 | 0.690746 |
| 219916_s_at  | ring finger protein 39                                                                             | RNF39                  | 80352  | -2.084744 | 0.690746 |
| 215942_s_at  | G-2 and S-phase expressed 1                                                                        | GTSE1                  | 51512  | -2.084968 | 0.690746 |
| 206070_s_at  | EPH receptor A3                                                                                    | EPHA3                  | 2042   | -2.087681 | 0.690746 |
| 211952_at    | RAN binding protein 5                                                                              | RANBP5                 | 3843   | -2.087985 | 0.690746 |
| 218826_at    | solute carrier family 35, member F2                                                                | SLC35F2                | 54733  | -2.08825  | 0.690746 |
| 207081_s_at  | phosphatidylinositol 4-kinase, catalytic, alpha                                                    | PI4KA                  | 5297   | -2.088335 | 0.690746 |
| 219253_at    | transmembrane protein 185B                                                                         | TMEM185B               | 79134  | -2.088494 | 0.690746 |
| 206439_at    | epiphyccan                                                                                         | EPYC                   | 1833   | -2.088748 | 0.690746 |
| 214908_s_at  | transformation/transcription domain-associated protein                                             | TRRAP                  | 8295   | -2.088777 | 0.690746 |
| 200917_s_at  | signal recognition particle receptor ('docking protein')                                           | SRPR                   | 6734   | -2.089363 | 0.690746 |
| 219034_at    | poly (ADP-ribose) polymerase family, member 16                                                     | PARP16                 | 54956  | -2.090203 | 0.690746 |
| 204986_s_at  | TAO kinase 2                                                                                       | TAOK2                  | 9344   | -2.090474 | 0.690746 |
| 217742_s_at  | WW domain containing adaptor with coiled-coil                                                      | WAC                    | 51322  | -2.09089  | 0.690746 |
| 210988_s_at  | prune homolog (Drosophila)                                                                         | PRUNE                  | 58497  | -2.092776 | 0.690746 |
| 202983_at    | helicase-like transcription factor                                                                 | HLTF                   | 6596   | -2.095223 | 0.690746 |
| 215962_at    | EST clone 22453 mariner transposon Hsmar1 sequence                                                 | ---                    | ---    | -2.095559 | 0.690746 |
| 209894_at    | leptin receptor                                                                                    | LEPR                   | 3953   | -2.097299 | 0.689975 |
| 206020_at    | suppressor of cytokine signaling 6                                                                 | SOCS6                  | 9306   | -2.097476 | 0.689975 |
| 206643_at    | histidine ammonia-lyase                                                                            | HAL                    | 3034   | -2.098356 | 0.689932 |
| 210776_x_at  | transcription factor 3 (E2A immunoglobulin enhancer binding factors E12/E47)                       | TCF3                   | 6929   | -2.100978 | 0.687862 |
| 200957_s_at  | structure specific recognition protein 1                                                           | SSRP1                  | 6749   | -2.101388 | 0.687862 |
| 211971_s_at  | leucine-rich PPR-motif containing                                                                  | LRPPRC                 | 10128  | -2.101504 | 0.687862 |
| 202128_at    | KIAA0317                                                                                           | KIAA0317               | 9870   | -2.101795 | 0.687862 |
| 2101073_s_at | SWI/SNF related, matrix associated, actin dependent regulator of chromatin, subfamily c, member 1  | SMARCC1                | 6599   | -2.101842 | 0.687862 |
| 206295_at    | interleukin 18 (interferon-gamma-inducing factor)                                                  | IL18                   | 3606   | -2.104929 | 0.686728 |
| 218103_at    | FtsJ homolog 3 (E. coli)                                                                           | FTSJ3                  | 117246 | -2.105221 | 0.686728 |
| 218819_at    | integrator complex subunit 6                                                                       | INTS6                  | 26512  | -2.105946 | 0.686728 |
| 200723_s_at  | cell cycle associated protein 1                                                                    | CAPRN1                 | 4076   | -2.106325 | 0.686728 |
| 221956_at    | leucine-rich repeats and calponin homology (CH) domain containing 4                                | LRCH4                  | 4034   | -2.106531 | 0.686728 |
| 203331_s_at  | inositol polyphosphate-5-phosphatase, 145kDa                                                       | INPP5D                 | 3635   | -2.106672 | 0.686728 |
| 209416_s_at  | fizzy/cell division cycle 20 related 1 (Drosophila)                                                | FZR1                   | 51343  | -2.107804 | 0.686728 |
| 217723_x_at  | ---                                                                                                | ---                    | ---    | -2.108104 | 0.686728 |
| 205166_at    | calpain 5                                                                                          | CAPN5                  | 726    | -2.108491 | 0.686728 |
| 205468_s_at  | interferon regulatory factor 5                                                                     | IRF5                   | 3663   | -2.108715 | 0.686728 |
| 201674_s_at  | A kinase (PKA) anchor protein 1                                                                    | AKAP1                  | 8165   | -2.108877 | 0.686728 |
| 213023_at    | utrophin                                                                                           | UTRN                   | 7402   | -2.10932  | 0.686728 |
| 209144_s_at  | core-binding factor, runt domain, alpha subunit 2; translocated to, 2                              | CBFA2T2                | 9139   | -2.10975  | 0.686728 |
| 218879_s_at  | methylenetetrahydrofolate synthetase domain containing                                             | MTHFSD                 | 64779  | -2.110068 | 0.686728 |
| 206796_at    | WNT1 inducible signaling pathway protein 1                                                         | WISP1                  | 8840   | -2.110411 | 0.686728 |
| 212360_at    | adenosine monophosphate deaminase 2 (isoform L)                                                    | AMPD2                  | 271    | -2.111929 | 0.686728 |
| 215862_at    | CDNA FLJ12301 fis. clone MAMMA1001858                                                              | ---                    | ---    | -2.112094 | 0.686728 |
| 204018_x_at  | hemoglobin, alpha 1 /// hemoglobin, alpha 2                                                        | HBA1 /// HBA, 3039 /// | 3040   | -2.112173 | 0.686728 |
| 212878_s_at  | kinesin light chain 1                                                                              | KLC1                   | 3831   | -2.112648 | 0.686728 |
| 218832_x_at  | arrestin, beta 1                                                                                   | ARRB1                  | 408    | -2.113476 | 0.686728 |
| 213155_at    | WSC domain containing 1                                                                            | WSCD1                  | 23302  | -2.113552 | 0.686728 |
| 202146_at    | interferon-related developmental regulator 1                                                       | IFRD1                  | 3475   | -2.113685 | 0.686728 |
| 220632_s_at  | protein-O-mannosyltransferase 2                                                                    | POMT2                  | 29954  | -2.11401  | 0.686728 |
| 211123_at    | solute carrier family 5 (sodium iodide symporter), member 5                                        | SLC5A5                 | 6528   | -2.114491 | 0.686728 |

Supplementary Table 5: Jurakt cells stimulated with PD-1/CD3/CD28 vs. CD3/CD28

|             |                                                                                                     |                             |        |           |          |
|-------------|-----------------------------------------------------------------------------------------------------|-----------------------------|--------|-----------|----------|
| 206438_x_at | tectonic family member 2                                                                            | TCTN2                       | 79867  | -2.114874 | 0.686728 |
| 219508_at   | glucosaminyl (N-acetyl) transferase 3, mucin type                                                   | GCNT3                       | 9245   | -2.11492  | 0.686728 |
| 204812_at   | ZW10, kinetochore associated, homolog (Drosophila)                                                  | ZW10                        | 9183   | -2.116306 | 0.686728 |
| 209560_s_at | delta-like 1 homolog (Drosophila)                                                                   | DLK1                        | 8788   | -2.116453 | 0.686728 |
| 205603_s_at | diaphanous homolog 2 (Drosophila)                                                                   | DIAPH2                      | 1730   | -2.116627 | 0.686728 |
| 203239_s_at | CCR4-NOT transcription complex, subunit 3                                                           | CNOT3                       | 4849   | -2.117422 | 0.686728 |
| 206222_at   | tumor necrosis factor receptor superfamily, member 10c, decoy without an intracellular domain       | TNFRSF10C                   | 8794   | -2.117558 | 0.686728 |
| 204105_s_at | neuronal cell adhesion molecule                                                                     | NRCAM                       | 4897   | -2.118006 | 0.686728 |
| 218272_at   | hypothetical protein FLJ20699                                                                       | FLJ20699                    | 55020  | -2.118028 | 0.686728 |
| 204729_s_at | syntaxin 1A (brain)                                                                                 | STX1A                       | 6804   | -2.119262 | 0.686728 |
| 219699_at   | leucine-rich repeat LIG1 family, member 2                                                           | LIG2                        | 55203  | -2.119283 | 0.686728 |
| 206968_s_at | nuclear factor related to kappaB binding protein                                                    | NFRKB                       | 4798   | -2.119337 | 0.686728 |
| 209178_at   | DEAH (Asp-Glu-Ala-His) box polypeptide 38                                                           | DHX38                       | 9785   | -2.119756 | 0.686728 |
| 1861_at     | BCL2-antagonist of cell death                                                                       | BAD                         | 572    | -2.12153  | 0.686542 |
| 214586_at   | G protein-coupled receptor 37 (endothelin receptor type B-like)                                     | GPR37                       | 2861   | -2.121871 | 0.686542 |
| 218423_x_at | vacuolar protein sorting 54 homolog (S. cerevisiae)                                                 | VPS54                       | 51542  | -2.121902 | 0.686542 |
| 203004_s_at | myocyte enhancer factor 2D                                                                          | MEF2D                       | 4209   | -2.122219 | 0.686542 |
| 220531_at   | hypothetical protein FLJ14126                                                                       | FLJ14126                    | 79907  | -2.122334 | 0.686542 |
| 216999_at   | erythropoietin receptor                                                                             | EPOR                        | 2057   | -2.122534 | 0.686542 |
| 218187_s_at | chromosome 8 open reading frame 33                                                                  | C8orf33                     | 65265  | -2.122742 | 0.686542 |
| 212695_at   | cryptochrome 2 (photolyase-like)                                                                    | CRY2                        | 1408   | -2.123731 | 0.686542 |
| 219272_at   | tripartite motif-containing 62                                                                      | TRIM62                      | 55223  | -2.124852 | 0.686542 |
| 210419_at   | BARX homeobox 2                                                                                     | BARX2                       | 8538   | -2.125676 | 0.686542 |
| 220872_at   | hypothetical protein PRO2964                                                                        | PRO2964                     | 55415  | -2.126031 | 0.686542 |
| 212145_at   | mitochondrial ribosomal protein S27                                                                 | MRPS27                      | 23107  | -2.126068 | 0.686542 |
| 204001_at   | small nuclear RNA activating complex, polypeptide 3, 50kDa                                          | SNAPC3                      | 6619   | -2.126071 | 0.686542 |
| 204800_s_at | dehydrogenase/reductase (SDR family) member 12                                                      | DHRS12                      | 79758  | -2.130237 | 0.686542 |
| 215108_x_at | TOX high mobility group box family member 3                                                         | TOX3                        | 27324  | -2.130624 | 0.686542 |
| 202922_at   | glutamate-cysteine ligase, catalytic subunit                                                        | GCLC                        | 2729   | -2.13114  | 0.686542 |
| 218898_at   | family with sequence similarity 57, member A                                                        | FAM57A                      | 79850  | -2.131284 | 0.686542 |
| 213410_at   | chromosome 10 open reading frame 137                                                                | C10orf137                   | 26098  | -2.131417 | 0.686542 |
| 221668_s_at | dynein, axonemal, intermediate chain 2                                                              | DNAI2                       | 64446  | -2.132977 | 0.686542 |
| 213330_s_at | stress-induced-phosphoprotein 1 (Hsp70/Hsp90-organizing protein)                                    | STIP1                       | 10963  | -2.133426 | 0.686542 |
| 215427_s_at | zinc finger, CCHC domain containing 14                                                              | ZCCHC14                     | 23174  | -2.133719 | 0.686542 |
| 202719_s_at | testis derived transcript (3 LIM domains)                                                           | TES                         | 26136  | -2.134118 | 0.686542 |
| 218156_s_at | TSR1, 20S rRNA accumulation, homolog (S. cerevisiae)                                                | TSR1                        | 55720  | -2.135615 | 0.686542 |
| 214300_s_at | topoisomerase (DNA) III alpha                                                                       | TOP3A                       | 7156   | -2.135752 | 0.686542 |
| 202557_at   | stress 70 protein chaperone, microsome-associated, 60kDa                                            | STCH                        | 6782   | -2.135785 | 0.686542 |
| 215707_s_at | prion protein (p27-30) (Creutzfeldt-Jakob disease, Gerstmann-Strausler-Scheinker syndrome, fat)     | PRNP                        | 5621   | -2.136941 | 0.686542 |
| 202062_s_at | sel-1 suppressor of lin-12-like (C. elegans)                                                        | SEL1L                       | 6400   | -2.136946 | 0.686542 |
| 203334_at   | DEAH (Asp-Glu-Ala-His) box polypeptide 8                                                            | DHX8                        | 1659   | -2.136985 | 0.686542 |
| 206053_at   | zinc finger protein 510                                                                             | ZNF510                      | 22869  | -2.137601 | 0.686542 |
| 213329_at   | SLIT-ROBO Rho GTPase activating protein 2                                                           | SRGAP2                      | 23380  | -2.1388   | 0.686542 |
| 209206_at   | SEC22 vesicle trafficking protein homolog B (S. cerevisiae)                                         | SEC22B                      | 9554   | -2.138914 | 0.686542 |
| 203515_s_at | phosphomevalonate kinase                                                                            | PMVK                        | 10654  | -2.139167 | 0.686542 |
| 206523_at   | pleckstrin homology, Sec7 and coiled-coil domains 3                                                 | PSCD3                       | 9265   | -2.140126 | 0.686542 |
| 222094_at   | sulfotransferase family, cytosolic, 1A, phenol-preferring, member 3 /// sulfotransferase family, cy | SULT1A3 /// S 445329 /// 68 | 140386 | -2.140386 | 0.686542 |
| 204984_at   | glypican 4                                                                                          | GPC4                        | 2239   | -2.140567 | 0.686542 |
| 201843_s_at | EGF-containing fibulin-like extracellular matrix protein 1                                          | EFEMP1                      | 2202   | -2.140826 | 0.686542 |
| 211121_s_at | docking protein 1, 62kDa (downstream of tyrosine kinase 1)                                          | DOK1                        | 1796   | -2.141491 | 0.686542 |
| 202978_s_at | CREB/ATF bZIP transcription factor                                                                  | CREBZF                      | 58487  | -2.142049 | 0.686542 |
| 210040_at   | solute carrier family 12, (potassium-chloride transporter) member 5                                 | SLC12A5                     | 57468  | -2.142179 | 0.686542 |
| 210299_s_at | four and a half LIM domains 1                                                                       | FHL1                        | 2273   | -2.142228 | 0.686542 |
| 201555_at   | minichromosome maintenance complex component 3                                                      | MCM3                        | 4172   | -2.143043 | 0.686542 |
| 204366_s_at | general transcription factor IIIC, polypeptide 2, beta 110kDa                                       | GTF3C2                      | 2976   | -2.144035 | 0.686542 |
| 202294_at   | stromal antigen 1                                                                                   | STAG1                       | 10274  | -2.144257 | 0.686542 |
| 215003_at   | DiGeorge syndrome critical region gene 9                                                            | DGCR9                       | 25787  | -2.145093 | 0.686542 |
| 217674_at   | Transcribed locus                                                                                   | ---                         | ---    | -2.145515 | 0.686542 |
| 203734_at   | forkhead box J2                                                                                     | FOXJ2                       | 55810  | -2.145855 | 0.686542 |
| 208914_at   | golgi associated, gamma adaptin ear containing, ARF binding protein 2                               | GGA2                        | 23062  | -2.146197 | 0.686542 |
| 215938_s_at | phospholipase A2, group VI (cytosolic, calcium-independent)                                         | PLA2G6                      | 8398   | -2.146673 | 0.686542 |
| 213181_s_at | molybdenum cofactor synthesis 1                                                                     | MOCS1                       | 4337   | -2.147583 | 0.686542 |
| 221806_s_at | SET domain containing 5                                                                             | SETD5                       | 55209  | -2.147709 | 0.686542 |
| 207199_at   | telomerase reverse transcriptase                                                                    | TERT                        | 7015   | -2.148831 | 0.686542 |
| 213078_x_at | 1-acylglycerol-3-phosphate O-acyltransferase 7 (lysophosphatidic acid acyltransferase, eta)         | AGPAT7                      | 254531 | -2.149065 | 0.686542 |
| 203204_s_at | jumonji domain containing 2A                                                                        | JMJD2A                      | 9682   | -2.150122 | 0.686542 |
| 200815_s_at | platelet-activating factor acetylhydrolase, isoform 1b, alpha subunit 45kDa                         | PAFAH1B1                    | 5048   | -2.150662 | 0.686542 |
| 213137_s_at | protein tyrosine phosphatase, non-receptor type 2                                                   | PTPN2                       | 5771   | -2.150883 | 0.686542 |
| 216071_x_at | mediator complex subunit 12                                                                         | MED12                       | 9968   | -2.151957 | 0.686542 |
| 219545_at   | potassium channel tetramerisation domain containing 14                                              | KCTD14                      | 65987  | -2.151986 | 0.686542 |
| 202012_s_at | exostoses (multiple) 2                                                                              | EXT2                        | 2132   | -2.152582 | 0.686542 |
| 201803_at   | polymerase (RNA) II (DNA directed) polypeptide B, 140kDa                                            | POLR2B                      | 5431   | -2.153225 | 0.686542 |
| 218148_at   | centromere protein T                                                                                | CENPT                       | 80152  | -2.153251 | 0.686542 |
| 200027_at   | asparaginyl-tRNA synthetase                                                                         | NARS                        | 4677   | -2.154465 | 0.686542 |
| 209383_at   | DNA-damage-inducible transcript 3                                                                   | DDIT3                       | 1649   | -2.154921 | 0.686542 |
| 215087_at   | chromosome 15 open reading frame 39                                                                 | C15orf39                    | 56905  | -2.155535 | 0.686542 |
| 219436_s_at | endomucin                                                                                           | EMCN                        | 51705  | -2.155581 | 0.686542 |
| 210811_s_at | DEAD (Asp-Glu-Ala-Asp) box polypeptide 49                                                           | DDX49                       | 54555  | -2.155755 | 0.686542 |
| 201614_s_at | RuvB-like 1 (E. coli)                                                                               | RUVBL1                      | 8607   | -2.156781 | 0.686542 |
| 212001_at   | splicing factor, arginine/serine-rich 14                                                            | SFRS14                      | 10147  | -2.157099 | 0.686542 |
| 205714_s_at | zinc finger, MYND-type containing 10                                                                | ZMYND10                     | 51364  | -2.157685 | 0.686542 |
| 218770_s_at | transmembrane protein 39B                                                                           | TMEM39B                     | 55116  | -2.158253 | 0.686542 |
| 200895_s_at | FK506 binding protein 4, 59kDa                                                                      | FKBP4                       | 2288   | -2.159055 | 0.686542 |
| 207082_at   | colony stimulating factor 1 (macrophage)                                                            | CSF1                        | 1435   | -2.159385 | 0.686542 |
| 206219_s_at | vav 1 guanine nucleotide exchange factor                                                            | VAV1                        | 7409   | -2.160304 | 0.686542 |
| 207262_at   | apolipoprotein F                                                                                    | APOF                        | 319    | -2.162416 | 0.686542 |

Supplementary Table 5: Jurakt cells stimulated with PD-1/CD3/CD28 vs. CD3/CD28

|             |                                                                                                   |                        |        |           |          |
|-------------|---------------------------------------------------------------------------------------------------|------------------------|--------|-----------|----------|
| 215994_x_at | TBC1 domain family, member 9B (with GRAM domain)                                                  | TBC1D9B                | 23061  | -2.162849 | 0.686542 |
| 213567_at   | Clone 23728 mRNA sequence                                                                         | ---                    | ---    | -2.162979 | 0.686542 |
| 208250_s_at | deleted in malignant brain tumors 1                                                               | DMBT1                  | 1755   | -2.163094 | 0.686542 |
| 206816_s_at | sperm associated antigen 8                                                                        | SPAG8                  | 26206  | -2.163388 | 0.686542 |
| 200976_s_at | Tax1 (human T-cell leukemia virus type I) binding protein 1                                       | TAX1BP1                | 8887   | -2.163838 | 0.686542 |
| 214759_at   | Wilms tumor 1 associated protein                                                                  | WTAP                   | 9589   | -2.16405  | 0.686542 |
| 202585_s_at | nuclear transcription factor, X-box binding 1                                                     | NFX1                   | 4799   | -2.16434  | 0.686542 |
| 220705_s_at | ADAM metalloproteinase with thrombospondin type 1 motif, 7                                        | ADAMTS7                | 11173  | -2.164575 | 0.686542 |
| 210220_at   | frizzled homolog 2 (Drosophila)                                                                   | FZD2                   | 2535   | -2.16495  | 0.686542 |
| 218466_at   | TBC1 domain family, member 17                                                                     | TBC1D17                | 79735  | -2.165674 | 0.686542 |
| 206223_at   | lemur tyrosine kinase 2                                                                           | LMTK2                  | 22853  | -2.166302 | 0.686542 |
| 211845_at   | poliovirus receptor-related 1 (herpesvirus entry mediator C)                                      | PVRL1                  | 5818   | -2.166726 | 0.686542 |
| 213194_at   | roundabout, axon guidance receptor, homolog 1 (Drosophila)                                        | ROBO1                  | 6091   | -2.167464 | 0.686542 |
| 203117_s_at | PAN2 polyA specific ribonuclease subunit homolog (S. cerevisiae)                                  | PAN2                   | 9924   | -2.167475 | 0.686542 |
| 212227_x_at | eukaryotic translation initiation factor 1                                                        | EIF1                   | 10209  | -2.168232 | 0.686542 |
| 217806_s_at | polymerase (DNA-directed), delta interacting protein 2                                            | POLDIP2                | 26073  | -2.168344 | 0.686542 |
| 208209_s_at | complement component 4 binding protein, beta                                                      | C4BPB                  | 725    | -2.168382 | 0.686542 |
| 202193_at   | LIM domain kinase 2                                                                               | LIMK2                  | 3985   | -2.169083 | 0.686542 |
| 36612_at    | KIAA0280                                                                                          | KIAA0280               | 23201  | -2.170443 | 0.686542 |
| 204633_s_at | ribosomal protein S6 kinase, 90kDa, polypeptide 5                                                 | RPS6KA5                | 9252   | -2.170597 | 0.686542 |
| 208251_at   | potassium voltage-gated channel, Shaw-related subfamily, member 4                                 | KCNK4                  | 3749   | -2.171525 | 0.686542 |
| 209054_s_at | Wolf-Hirschhorn syndrome candidate 1                                                              | WHSC1                  | 7468   | -2.172839 | 0.686542 |
| 216133_at   | T cell receptor V alpha gene segment V-alpha-w23, clone IGRa01                                    | ---                    | ---    | -2.172954 | 0.686542 |
| 201925_s_at | CD55 molecule, decay accelerating factor for complement (Cromer blood group)                      | CD55                   | 1604   | -2.17338  | 0.686542 |
| 212507_at   | transmembrane protein 131                                                                         | TMEM131                | 23505  | -2.173763 | 0.686542 |
| 222315_at   | Transcribed locus                                                                                 | ---                    | ---    | -2.174098 | 0.686542 |
| 212945_s_at | MAX gene associated                                                                               | MGA                    | 23269  | -2.17413  | 0.686542 |
| 214665_s_at | calcium binding protein P22                                                                       | CHP                    | 11261  | -2.174309 | 0.686542 |
| 201930_at   | minichromosome maintenance complex component 6                                                    | MCM6                   | 4175   | -2.174455 | 0.686542 |
| 204760_s_at | thyroid hormone receptor, alpha (erythroblastic leukemia viral (v-erb-a) oncogene homolog, avian) | NR1D1 /// THI 7067 /// | 9572   | -2.174969 | 0.686542 |
| 217791_s_at | aldehyde dehydrogenase 18 family, member A1                                                       | ALDH18A1               | 5832   | -2.175986 | 0.686542 |
| 214404_x_at | SAM pointed domain containing ets transcription factor                                            | SPDEF                  | 25803  | -2.176221 | 0.686542 |
| 219627_at   | zinc finger family member 767                                                                     | ZNF767                 | 79970  | -2.176367 | 0.686542 |
| 219578_s_at | cytoplasmic polyadenylation element binding protein 1                                             | CPEB1                  | 64506  | -2.177137 | 0.686542 |
| 207268_x_at | abl interactor 2                                                                                  | ABI2                   | 10152  | -2.178838 | 0.686542 |
| 37232_at    | KIAA0586                                                                                          | KIAA0586               | 9786   | -2.179151 | 0.686542 |
| 212826_s_at | solute carrier family 25 (mitochondrial carrier; adenine nucleotide translocator), member 6       | SLC25A6                | 293    | -2.179688 | 0.686542 |
| 207990_x_at | acrosomal vesicle protein 1                                                                       | ACRV1                  | 56     | -2.180286 | 0.686542 |
| 214552_s_at | rabaptin, RAB GTPase binding effector protein 1                                                   | RABEP1                 | 9135   | -2.180834 | 0.686542 |
| 203841_x_at | microtubule-associated protein, RP/EB family, member 3                                            | MAPRE3                 | 22924  | -2.181209 | 0.686542 |
| 218954_s_at | BRF2, subunit of RNA polymerase III transcription initiation factor, BRF1-like                    | BRF2                   | 55290  | -2.181907 | 0.686542 |
| 202444_s_at | ER lipid raft associated 1                                                                        | ERLIN1                 | 10613  | -2.182987 | 0.686542 |
| 210718_s_at | ADP-ribosylation factor-like 17 pseudogene 1                                                      | ARL17P1                | 51326  | -2.184163 | 0.686542 |
| 218168_s_at | chaperone, ABC1 activity of bc1 complex homolog (S. pombe)                                        | CABC1                  | 56997  | -2.184196 | 0.686542 |
| 214323_s_at | UPF3 regulator of nonsense transcripts homolog A (yeast)                                          | UPF3A                  | 65110  | -2.184649 | 0.686542 |
| 201195_s_at | solute carrier family 7 (cationic amino acid transporter, y+ system), member 5                    | SLC7A5                 | 8140   | -2.184749 | 0.686542 |
| 207915_at   | ---                                                                                               | ---                    | ---    | -2.184892 | 0.686542 |
| 201651_s_at | protein kinase C and casein kinase substrate in neurons 2                                         | PACSLIN2               | 11252  | -2.185535 | 0.686542 |
| 204373_s_at | centrosomal protein 350kDa                                                                        | CEP350                 | 9857   | -2.185897 | 0.686542 |
| 219615_s_at | potassium channel, subfamily K, member 5                                                          | KCNK5                  | 8645   | -2.188829 | 0.686542 |
| 213378_s_at | DEAD/H (Asp-Glu-Ala-Asp/His) box polypeptide 11 (CHL1-like helicase homolog, S. cerevisiae) //    | DDX11 /// DD 1663 ///  | 4400   | -2.189251 | 0.686542 |
| 203990_s_at | ubiquitously transcribed tetratricopeptide repeat, X chromosome                                   | UTX                    | 7403   | -2.189485 | 0.686542 |
| 200806_s_at | heat shock 60kDa protein 1 (chaperonin)                                                           | HSPD1                  | 3329   | -2.189498 | 0.686542 |
| 204849_at   | transcription factor-like 5 (basic helix-loop-helix)                                              | TCFL5                  | 10732  | -2.18992  | 0.686542 |
| 208839_s_at | cullin-associated and neddylation-dissociated 1                                                   | CAND1                  | 55832  | -2.190477 | 0.686542 |
| 218889_at   | nucleolar complex associated 3 homolog (S. cerevisiae)                                            | NOC3L                  | 64318  | -2.191022 | 0.686542 |
| 204169_at   | IMP (inosine monophosphate) dehydrogenase 1                                                       | IMPDH1                 | 3614   | -2.191228 | 0.686542 |
| 204502_at   | SAM domain and HD domain 1                                                                        | SAMHD1                 | 25939  | -2.191747 | 0.686542 |
| 213759_at   | ADP-ribosylation factor-like 4C                                                                   | ARL4C                  | 10123  | -2.192081 | 0.686542 |
| 54970_at    | zinc finger, MIZ-type containing 2                                                                | ZMIZ2                  | 83637  | -2.19274  | 0.686542 |
| 213900_at   | chromosome 9 open reading frame 61                                                                | C9orf61                | 9413   | -2.193065 | 0.686542 |
| 211280_s_at | nuclear respiratory factor 1                                                                      | NRF1                   | 4899   | -2.196489 | 0.686542 |
| 221868_at   | poly(A) binding protein interacting protein 2B                                                    | PAIP2B                 | 400961 | -2.197351 | 0.686542 |
| 201561_s_at | calsyntenin 1                                                                                     | CLSTN1                 | 22883  | -2.19793  | 0.686542 |
| 219715_s_at | tyrosyl-DNA phosphodiesterase 1                                                                   | TDP1                   | 55775  | -2.198645 | 0.686542 |
| 202100_at   | v-ral simian leukemia viral oncogene homolog B (ras related; GTP binding protein)                 | RALB                   | 5899   | -2.199149 | 0.686542 |
| 205577_at   | phosphorylase, glycogen; muscle (McArdle syndrome, glycogen storage disease type V)               | PYGM                   | 5837   | -2.199636 | 0.686542 |
| 215696_s_at | SEC16 homolog A (S. cerevisiae)                                                                   | SEC16A                 | 9919   | -2.2018   | 0.686542 |
| 208346_at   | pro-platelet basic protein-like 2                                                                 | PPBPL2                 | 10895  | -2.202144 | 0.686542 |
| 203623_at   | plexin A3                                                                                         | PLXNA3                 | 55558  | -2.203018 | 0.686542 |
| 201385_at   | DEAH (Asp-Glu-Ala-His) box polypeptide 15                                                         | DHX15                  | 1665   | -2.203038 | 0.686542 |
| 214934_at   | ATPase, class II, type 9B                                                                         | ATP9B                  | 374868 | -2.203082 | 0.686542 |
| 215481_s_at | peroxisomal biogenesis factor 5                                                                   | PEX5                   | 5830   | -2.203987 | 0.686542 |
| 208117_s_at | LAS1-like (S. cerevisiae)                                                                         | LAS1L                  | 81887  | -2.205221 | 0.686542 |
| 216277_at   | BUB1 budding uninhibited by benzimidazoles 1 homolog (yeast)                                      | BUB1                   | 699    | -2.20638  | 0.686542 |
| 205080_at   | retinoic acid receptor, beta                                                                      | RARB                   | 5915   | -2.207232 | 0.686542 |
| 214484_s_at | opioid receptor, sigma 1                                                                          | OPRS1                  | 10280  | -2.207807 | 0.686542 |
| 215180_at   | MRNA full length insert cDNA clone EUROIMAGE 897021                                               | ---                    | ---    | -2.208227 | 0.686542 |
| 214848_at   | Clone 23548 mRNA sequence                                                                         | ---                    | ---    | -2.211651 | 0.686542 |
| 200866_s_at | prosaposin (variant Gaucher disease and variant metachromatic leukodystrophy)                     | PSAP                   | 5660   | -2.212461 | 0.686542 |
| 204355_at   | DEAH (Asp-Glu-Ala-His) box polypeptide 30                                                         | DHX30                  | 22907  | -2.212603 | 0.686542 |
| 215258_at   | cell adhesion molecule 4                                                                          | CADM4                  | 199731 | -2.212824 | 0.686542 |
| 202547_s_at | Rho guanine nucleotide exchange factor (GEF) 7                                                    | ARHGEF7                | 8874   | -2.213502 | 0.686542 |
| 203611_at   | telomeric repeat binding factor 2                                                                 | TERF2                  | 7014   | -2.214031 | 0.686542 |
| 210337_s_at | ATP citrate lyase                                                                                 | ACLY                   | 47     | -2.214344 | 0.686542 |
| 210812_at   | X-ray repair complementing defective repair in Chinese hamster cells 4                            | XRCC4                  | 7518   | -2.214427 | 0.686542 |

Supplementary Table 5: Jurakt cells stimulated with PD-1/CD3/CD28 vs. CD3/CD28

|             |                                                                                                   |           |        |           |          |
|-------------|---------------------------------------------------------------------------------------------------|-----------|--------|-----------|----------|
| 207711_at   | chromosome 20 open reading frame 117                                                              | C20orf117 | 140710 | -2.214452 | 0.686542 |
| 203513_at   | spastic paraplegia 11 (autosomal recessive)                                                       | SPG11     | 80208  | -2.2147   | 0.686542 |
| 221812_at   | F-box protein 42                                                                                  | FBXO42    | 54455  | -2.214808 | 0.686542 |
| 221121_at   | chromosome X open reading frame 48                                                                | CXorf48   | 54967  | -2.215704 | 0.686542 |
| 208368_s_at | breast cancer 2, early onset                                                                      | BRCA2     | 675    | -2.216422 | 0.686542 |
| 202911_at   | mutS homolog 6 (E. coli)                                                                          | MSH6      | 2956   | -2.216674 | 0.686542 |
| 207529_at   | defensin, alpha 5, Paneth cell-specific                                                           | DEFA5     | 1670   | -2.217038 | 0.686542 |
| 210958_s_at | microtubule associated serine/threonine kinase family member 4                                    | MAST4     | 375449 | -2.217666 | 0.686542 |
| 213530_at   | RAB3 GTPase activating protein subunit 1 (catalytic)                                              | RAB3GAP1  | 22930  | -2.21794  | 0.686542 |
| 218399_s_at | cell division cycle associated 4                                                                  | CDC44     | 55038  | -2.218148 | 0.686542 |
| 220435_at   | solute carrier family 30, member 10                                                               | SLC30A10  | 55532  | -2.218493 | 0.686542 |
| 217678_at   | solute carrier family 7, (cationic amino acid transporter, y+ system) member 11                   | SLC7A11   | 23657  | -2.219935 | 0.686542 |
| 219027_s_at | myosin IXA                                                                                        | MYO9A     | 4649   | -2.220165 | 0.686542 |
| 204584_at   | L1 cell adhesion molecule                                                                         | L1CAM     | 3897   | -2.220599 | 0.686542 |
| 206414_s_at | development and differentiation enhancing factor 2                                                | DDEF2     | 8853   | -2.220922 | 0.686542 |
| 217954_s_at | PHD finger protein 3                                                                              | PHF3      | 23469  | -2.221766 | 0.686542 |
| 207620_s_at | calcium/calmodulin-dependent serine protein kinase (MAGUK family)                                 | CASK      | 8573   | -2.221926 | 0.686542 |
| 215832_x_at | phosphatidylinositol binding clathrin assembly protein                                            | PICALM    | 8301   | -2.22245  | 0.686542 |
| 214849_at   | potassium channel tetramerisation domain containing 20                                            | KCTD20    | 222658 | -2.223403 | 0.686542 |
| 216491_x_at | immunoglobulin heavy constant mu                                                                  | IGHM      | 3507   | -2.225147 | 0.686542 |
| 206231_at   | potassium intermediate/small conductance calcium-activated channel, subfamily N, member 1         | KCNN1     | 3780   | -2.225443 | 0.686542 |
| 203068_at   | kelch-like 21 (Drosophila)                                                                        | KLHL21    | 9903   | -2.225494 | 0.686542 |
| 201713_s_at | RAN binding protein 2                                                                             | RANBP2    | 5903   | -2.226792 | 0.686542 |
| 218009_s_at | protein regulator of cytokinesis 1                                                                | PRC1      | 9055   | -2.227348 | 0.686542 |
| 217295_at   | mucin 8                                                                                           | MUC8      | 4590   | -2.227474 | 0.686542 |
| 211671_s_at | nuclear receptor subfamily 3, group C, member 1 (glucocorticoid receptor)                         | NR3C1     | 2908   | -2.228221 | 0.686542 |
| 220048_at   | ectodysplasin A receptor                                                                          | EDAR      | 10913  | -2.229226 | 0.686542 |
| 212781_at   | retinoblastoma binding protein 6                                                                  | RBBP6     | 5930   | -2.229234 | 0.686542 |
| 206817_x_at | trinucleotide repeat containing 4                                                                 | TNRC4     | 11189  | -2.234329 | 0.686542 |
| 211938_at   | eukaryotic translation initiation factor 4B                                                       | EIF4B     | 1975   | -2.234651 | 0.686542 |
| 217715_x_at | ---                                                                                               | ---       | ---    | -2.234661 | 0.686542 |
| 205437_at   | zinc finger protein 211                                                                           | ZNF211    | 10520  | -2.235113 | 0.686542 |
| 220868_s_at | solute carrier family 7, (neutral amino acid transporter, y+ system) member 10                    | SLC7A10   | 56301  | -2.236332 | 0.686542 |
| 202807_s_at | target of myb1 (chicken)                                                                          | TOM1      | 10043  | -2.236589 | 0.686542 |
| 210420_at   | solute carrier family 24 (sodium/potassium/calcium exchanger), member 1                           | SLC24A1   | 9187   | -2.23922  | 0.686542 |
| 201905_s_at | CTD (carboxy-terminal domain, RNA polymerase II, polypeptide A) small phosphatase-like            | CTDSPL    | 10217  | -2.23956  | 0.686542 |
| 218636_s_at | mannosidase, alpha, class 1B, member 1                                                            | MAN1B1    | 11253  | -2.239969 | 0.686542 |
| 210064_s_at | uropod 1B                                                                                         | UPK1B     | 7348   | -2.240195 | 0.686542 |
| 203859_s_at | paralemmin                                                                                        | PALM      | 5064   | -2.241415 | 0.686542 |
| 219832_s_at | homeobox C13                                                                                      | HOXC13    | 3229   | -2.241665 | 0.686542 |
| 200687_s_at | splicing factor 3b, subunit 3, 130kDa                                                             | SF3B3     | 23450  | -2.242182 | 0.686542 |
| 209267_s_at | solute carrier family 39 (zinc transporter), member 8                                             | SLC39A8   | 64116  | -2.242247 | 0.686542 |
| 208623_s_at | ezrin                                                                                             | EZR       | 7430   | -2.243041 | 0.686542 |
| 206052_s_at | stem-loop (histone) binding protein                                                               | SLBP      | 7884   | -2.243111 | 0.686542 |
| 215039_at   | Hypothetical protein LOC339524                                                                    | LOC339524 | 339524 | -2.243978 | 0.686542 |
| 221939_at   | Yip1 domain family, member 2                                                                      | YIPF2     | 78992  | -2.245067 | 0.686542 |
| 213304_at   | KIAA0423                                                                                          | KIAA0423  | 23116  | -2.245211 | 0.686542 |
| 204370_at   | CLP1, cleavage and polyadenylation factor I subunit, homolog (S. cerevisiae)                      | CLP1      | 10978  | -2.245755 | 0.686542 |
| 201583_s_at | Sec23 homolog B (S. cerevisiae)                                                                   | SEC23B    | 10483  | -2.246997 | 0.686542 |
| 213436_at   | cannabinoid receptor 1 (brain)                                                                    | CNR1      | 1268   | -2.247831 | 0.686542 |
| 219611_s_at | coiled-coil domain containing 21                                                                  | CCDC21    | 64793  | -2.248277 | 0.686542 |
| 212352_s_at | transmembrane emp24-like trafficking protein 10 (yeast)                                           | TMED10    | 10972  | -2.249222 | 0.686542 |
| 222078_at   | Transcribed locus                                                                                 | ---       | ---    | -2.250674 | 0.686542 |
| 206260_at   | transglutaminase 4 (prostate)                                                                     | TGM4      | 7047   | -2.251007 | 0.686542 |
| 203338_at   | protein phosphatase 2, regulatory subunit B', epsilon isoform                                     | PPP2R5E   | 5529   | -2.25102  | 0.686542 |
| 209318_x_at | pleiomorphic adenoma gene-like 1                                                                  | PLAGL1    | 5325   | -2.251729 | 0.686542 |
| 203777_s_at | ribosomal protein S6 kinase, 70kDa, polypeptide 2                                                 | RPS6KB2   | 6199   | -2.252934 | 0.686542 |
| 216399_s_at | S phase cyclin A-associated protein in the ER                                                     | SCAPER    | 49855  | -2.256001 | 0.686542 |
| 208227_x_at | ADAM metallopeptidase domain 22                                                                   | ADAM22    | 53616  | -2.256773 | 0.686542 |
| 208160_at   | hypothetical protein FLJ10232                                                                     | FLJ10232  | 55099  | -2.258008 | 0.685974 |
| 207722_s_at | BTB (POZ) domain containing 2                                                                     | BTBD2     | 55643  | -2.258385 | 0.685974 |
| 203083_at   | thrombospondin 2                                                                                  | THBS2     | 7058   | -2.259101 | 0.685667 |
| 207752_x_at | proline-rich protein BstNI subfamily 1                                                            | PRB1      | 5542   | -2.259564 | 0.685566 |
| 213323_s_at | zinc finger CCCH-type containing 7B                                                               | ZC3H7B    | 23264  | -2.260079 | 0.685408 |
| 219048_at   | phosphatidylinositol glycan anchor biosynthesis, class N                                          | PIGN      | 23556  | -2.260154 | 0.685408 |
| 206882_at   | solute carrier family 1 (high affinity aspartate/glutamate transporter), member 6                 | SLC1A6    | 6511   | -2.260321 | 0.685408 |
| 206960_at   | G protein-coupled receptor 23                                                                     | GPR23     | 2846   | -2.260431 | 0.685408 |
| 220939_s_at | dipeptidyl-peptidase 8                                                                            | DPP8      | 54878  | -2.261081 | 0.685408 |
| 206798_x_at | deleted in lung and esophageal cancer 1                                                           | DLEC1     | 9940   | -2.261741 | 0.685408 |
| 206942_s_at | pro-melanin-concentrating hormone                                                                 | PMCH      | 5367   | -2.264922 | 0.685365 |
| 211815_s_at | golgi associated, gamma adaptin ear containing, ARF binding protein 3                             | GGA3      | 23163  | -2.26522  | 0.685365 |
| 212674_s_at | DEAH (Asp-Glu-Ala-His) box polypeptide 30                                                         | DHX30     | 22907  | -2.265978 | 0.685365 |
| 211207_s_at | acyl-CoA synthetase long-chain family member 6                                                    | ACSL6     | 23305  | -2.266437 | 0.685365 |
| 202309_at   | methylentetrahydrofolate dehydrogenase (NADP+ dependent) 1, methenyltetrahydrofolate cycl         | MTHFD1    | 4522   | -2.266963 | 0.685365 |
| 203636_at   | midline 1 (Opitz/BBB syndrome)                                                                    | MID1      | 4281   | -2.267064 | 0.685365 |
| 222353_at   | LIM domains containing 1                                                                          | LIMD1     | 8994   | -2.268024 | 0.685365 |
| 208225_at   | fibroblast growth factor receptor 2 (bacteria-expressed kinase, keratinocyte growth factor recept | FGFR2     | 2263   | -2.268229 | 0.685365 |
| 203077_s_at | SMAD family member 2                                                                              | SMAD2     | 4087   | -2.268909 | 0.685365 |
| 206419_at   | RAR-related orphan receptor C                                                                     | RORC      | 6097   | -2.270099 | 0.685365 |
| 209291_at   | inhibitor of DNA binding 4, dominant negative helix-loop-helix protein                            | ID4       | 3400   | -2.270506 | 0.685365 |
| 216676_x_at | killer cell immunoglobulin-like receptor, three domains, long cytoplasmic tail, 3                 | KIR3DL3   | 115653 | -2.271168 | 0.685365 |
| 211185_s_at | splicing factor 3b, subunit 1, 155kDa                                                             | SF3B1     | 23451  | -2.271568 | 0.685365 |
| 211599_x_at | met proto-oncogene (hepatocyte growth factor receptor)                                            | MET       | 4233   | -2.271828 | 0.685365 |
| 206412_at   | fer (fps/fes related) tyrosine kinase (phosphoprotein NCP94)                                      | FER       | 2241   | -2.272748 | 0.685365 |
| 214387_x_at | surfactant, pulmonary-associated protein C                                                        | SFTPC     | 6440   | -2.272893 | 0.685365 |
| 213318_s_at | HLA-B associated transcript 3                                                                     | BAT3      | 7917   | -2.273493 | 0.685365 |

Supplementary Table 5: Jurakt cells stimulated with PD-1/CD3/CD28 vs. CD3/CD28

|             |                                                                                                                            |                              |        |           |          |
|-------------|----------------------------------------------------------------------------------------------------------------------------|------------------------------|--------|-----------|----------|
| 221870_at   | :EH-domain containing 2                                                                                                    | :EHD2                        | 30846  | -2.273936 | 0.685365 |
| 210157_at   | :chromosome 19 open reading frame 2                                                                                        | :C19orf2                     | 8725   | -2.274789 | 0.685365 |
| 214198_s_at | :DiGeorge syndrome critical region gene 2                                                                                  | :DGCR2                       | 9993   | -2.275103 | 0.685365 |
| 216825_s_at | :myeloproliferative leukemia virus oncogene                                                                                | :MPL                         | 4352   | -2.275909 | 0.685365 |
| 215624_at   | :tuberous sclerosis 2                                                                                                      | :TSC2                        | 7249   | -2.277161 | 0.685365 |
| 202159_at   | :phenylalanyl-tRNA synthetase, alpha subunit                                                                               | :FARSA                       | 2193   | -2.277216 | 0.685365 |
| 201079_at   | :synaptogyrin 2                                                                                                            | :SYNGR2                      | 9144   | -2.277694 | 0.685365 |
| 222038_s_at | :Non-metastatic cells 1, protein (NM23A) expressed in                                                                      | :NME1                        | 4830   | -2.27775  | 0.685365 |
| 206730_at   | :glutamate receptor, ionotropic, AMPA 3                                                                                    | :GRIA3                       | 2892   | -2.27797  | 0.685365 |
| 203902_at   | :hephaestin                                                                                                                | :HEPH                        | 9843   | -2.27797  | 0.685365 |
| 220206_at   | :zinc finger, MYM-type 1                                                                                                   | :ZMYM1                       | 79830  | -2.278194 | 0.685365 |
| 201490_s_at | :peptidylprolyl isomerase F (cyclophilin F)                                                                                | :PPIF                        | 10105  | -2.279127 | 0.685365 |
| 218794_s_at | :thioredoxin-like 4B                                                                                                       | :TXNL4B                      | 54957  | -2.279673 | 0.685365 |
| 206748_s_at | :sperm associated antigen 9                                                                                                | :SPAG9                       | 9043   | -2.280403 | 0.685365 |
| 213191_at   | :toll-like receptor adaptor molecule 1                                                                                     | :TICAM1                      | 148022 | -2.280527 | 0.685365 |
| 220332_at   | :claudin 16                                                                                                                | :CLDN16                      | 10686  | -2.280852 | 0.685365 |
| 205282_at   | :low density lipoprotein receptor-related protein 8, apolipoprotein e receptor                                             | :LRP8                        | 7804   | -2.280869 | 0.685365 |
| 216155_at   | :CDNA: FLJ20890 fis. clone ADKA03323                                                                                       | ---                          | ---    | -2.281237 | 0.685365 |
| 220124_at   | :giant axonal neuropathy (gigaxonin)                                                                                       | :GAN                         | 8139   | -2.281394 | 0.685365 |
| 213511_s_at | :myotubularin related protein 1                                                                                            | :MTMR1                       | 8776   | -2.28229  | 0.685365 |
| 209424_s_at | :alpha-methylacyl-CoA racemase                                                                                             | :AMACR                       | 23600  | -2.282733 | 0.685365 |
| 209776_s_at | :solute carrier family 19 (folate transporter), member 1                                                                   | :SLC19A1                     | 6573   | -2.283009 | 0.685365 |
| 207275_s_at | :acyl-CoA synthetase long-chain family member 1                                                                            | :ACSL1                       | 2180   | -2.283874 | 0.685365 |
| 217532_x_at | :Transcribed locus                                                                                                         | ---                          | ---    | -2.284628 | 0.685365 |
| 200000_s_at | :PRP8 pre-mRNA processing factor 8 homolog (S. cerevisiae)                                                                 | :PRPF8                       | 10594  | -2.285924 | 0.685365 |
| 201386_s_at | :DEAH (Asp-Glu-Ala-His) box polypeptide 15                                                                                 | :DHX15                       | 1665   | -2.287825 | 0.685365 |
| 211199_s_at | :inducible T-cell co-stimulator ligand                                                                                     | :ICOSLG                      | 23308  | -2.288636 | 0.685365 |
| 205074_at   | :solute carrier family 22 (organic cation transporter), member 5                                                           | :SLC22A5                     | 6584   | -2.289157 | 0.685365 |
| 200699_at   | :KDEL (Lys-Asp-Glu-Leu) endoplasmic reticulum protein retention receptor 2                                                 | :KDELRL2                     | 11014  | -2.290323 | 0.685365 |
| 204077_x_at | :ectonucleoside triphosphate diphosphohydrolase 4                                                                          | :ENTPD4                      | 9583   | -2.290761 | 0.685365 |
| 209256_s_at | :KIAA0265 protein                                                                                                          | :KIAA0265                    | 23008  | -2.29189  | 0.685365 |
| 207865_s_at | :bone morphogenetic protein 8b (osteogenic protein 2)                                                                      | :BMP8B                       | 656    | -2.292354 | 0.685365 |
| 210194_at   | :phospholipase A2 receptor 1, 180kDa                                                                                       | :PLA2R1                      | 22925  | -2.292799 | 0.685365 |
| 218093_s_at | :ankyrin repeat domain 10                                                                                                  | :ANKRD10                     | 55608  | -2.294319 | 0.685365 |
| 200860_s_at | :CCR4-NOT transcription complex, subunit 1                                                                                 | :CNOT1                       | 23019  | -2.294494 | 0.685365 |
| 202140_s_at | :CDC-like kinase 3                                                                                                         | :CLK3                        | 1198   | -2.295039 | 0.685365 |
| 204374_s_at | :galactokinase 1                                                                                                           | :GALK1                       | 2584   | -2.296676 | 0.685365 |
| 212331_at   | :retinoblastoma-like 2 (p130)                                                                                              | :RBL2                        | 5934   | -2.296832 | 0.685365 |
| 212098_at   | :hypothetical protein LOC151162                                                                                            | :LOC151162                   | 151162 | -2.297328 | 0.685365 |
| 211527_x_at | :vascular endothelial growth factor A                                                                                      | :VEGFA                       | 7422   | -2.297748 | 0.685365 |
| 215913_s_at | :GULP, engulfment adaptor PTB domain containing 1                                                                          | :GULP1                       | 51454  | -2.298642 | 0.685365 |
| 203721_s_at | :UTP18, small subunit (SSU) processome component, homolog (yeast)                                                          | :UTP18                       | 51096  | -2.299919 | 0.685365 |
| 214840_at   | :target of myb1-like 2 (chicken)                                                                                           | :TOM1L2                      | 146691 | -2.300746 | 0.685365 |
| 208030_s_at | :adducin 1 (alpha)                                                                                                         | :ADD1                        | 118    | -2.301123 | 0.685365 |
| 211160_x_at | :actinin, alpha 1                                                                                                          | :ACTN1                       | 87     | -2.303101 | 0.685365 |
| 215954_s_at | :chromosome 19 open reading frame 29                                                                                       | :C19orf29                    | 58509  | -2.303515 | 0.685365 |
| 210475_at   | :POU class 3 homeobox 1                                                                                                    | :POU3F1                      | 5453   | -2.304302 | 0.685365 |
| 219650_at   | :excision repair cross-complementing rodent repair deficiency, complementation group 6-like                                | :ERCC6L                      | 54821  | -2.30513  | 0.685365 |
| 205935_at   | :forkhead box F1                                                                                                           | :FOXF1                       | 2294   | -2.306617 | 0.685365 |
| 201380_at   | :cartilage associated protein                                                                                              | :CRTAP                       | 10491  | -2.306769 | 0.685365 |
| 209345_s_at | :phosphatidylinositol 4-kinase type 2 alpha                                                                                | :PI4K2A                      | 55361  | -2.306846 | 0.685365 |
| 202186_x_at | :protein phosphatase 2, regulatory subunit B', alpha isoform                                                               | :PPP2R5A                     | 5525   | -2.306997 | 0.685365 |
| 202407_s_at | :PRP31 pre-mRNA processing factor 31 homolog (S. cerevisiae)                                                               | :PRPF31                      | 26121  | -2.308361 | 0.685365 |
| 212214_at   | :optic atrophy 1 (autosomal dominant)                                                                                      | :OPA1                        | 4976   | -2.309132 | 0.685365 |
| 208918_s_at | :NAD kinase                                                                                                                | :NADK                        | 65220  | -2.30924  | 0.685365 |
| 203315_at   | :NCK adaptor protein 2 /// similar to NCK adaptor protein 2                                                                | :LOC729030 /// 729030 /// 84 | ---    | -2.309435 | 0.685365 |
| 220911_s_at | :KIAA1305                                                                                                                  | :KIAA1305                    | 57523  | -2.310209 | 0.685365 |
| 204824_at   | :endonuclease G                                                                                                            | :ENDOG                       | 2021   | -2.310731 | 0.685365 |
| 221987_s_at | :TSR1, 20S rRNA accumulation, homolog (S. cerevisiae)                                                                      | :TSR1                        | 55720  | -2.31182  | 0.685365 |
| 211934_x_at | :glucosidase, alpha; neutral AB                                                                                            | :GANAB                       | 23193  | -2.311841 | 0.685365 |
| 205911_at   | :parathyroid hormone receptor 1                                                                                            | :PTH1R                       | 5745   | -2.311931 | 0.685365 |
| 203743_s_at | :thymine-DNA glycosylase                                                                                                   | :TDG                         | 6996   | -2.312533 | 0.685365 |
| 201516_at   | :spermidine synthase                                                                                                       | :SRM                         | 6723   | -2.314169 | 0.685365 |
| 200659_s_at | :prohibitin                                                                                                                | :PHB                         | 5245   | -2.314251 | 0.685365 |
| 211391_s_at | :POZ (BTB) and AT hook containing zinc finger 1                                                                            | :PATZ1                       | 23598  | -2.314692 | 0.685365 |
| 211852_s_at | :attractin                                                                                                                 | :ATRN                        | 8455   | -2.316475 | 0.685365 |
| 215072_x_at | :chromosome 10 open reading frame 137                                                                                      | :C10orf137                   | 26098  | -2.316519 | 0.685365 |
| 205236_x_at | :superoxide dismutase 3, extracellular                                                                                     | :SOD3                        | 6649   | -2.316625 | 0.685365 |
| 222161_at   | :N-acetylated alpha-linked acidic dipeptidase 2                                                                            | :NAALAD2                     | 10003  | -2.318389 | 0.685365 |
| 204119_s_at | :adenosine kinase                                                                                                          | :ADK                         | 132    | -2.319495 | 0.685365 |
| 208694_at   | :protein kinase, DNA-activated, catalytic polypeptide                                                                      | :PRKDC                       | 5591   | -2.321562 | 0.685365 |
| 211519_s_at | :kinesin family member 2C                                                                                                  | :KIF2C                       | 11004  | -2.32162  | 0.685365 |
| 210789_x_at | :carcinoembryonic antigen-related cell adhesion molecule 3                                                                 | :CEACAM3                     | 1084   | -2.321977 | 0.685365 |
| 55065_at    | :MAP/microtubule affinity-regulating kinase 4                                                                              | :MARK4                       | 57787  | -2.323205 | 0.685365 |
| 216696_s_at | :proline dehydrogenase (oxidase) 2                                                                                         | :PRODH2                      | 58510  | -2.323785 | 0.685365 |
| 215644_at   | :zinc finger protein 518A                                                                                                  | :ZNF518A                     | 9849   | -2.324186 | 0.685365 |
| 215261_at   | :Clone 23578 mRNA sequence                                                                                                 | ---                          | ---    | -2.325709 | 0.685365 |
| 214511_x_at | :Fc fragment of IgG, high affinity Ib, receptor (CD64)                                                                     | :FCGR1B                      | 2210   | -2.327473 | 0.685365 |
| 202679_at   | :Niemann-Pick disease, type C1                                                                                             | :NPC1                        | 4864   | -2.328666 | 0.685365 |
| 210620_s_at | :general transcription factor IIIC, polypeptide 2, beta 110kDa                                                             | :GTF3C2                      | 2976   | -2.329217 | 0.685365 |
| 216389_s_at | :WD repeat domain 23                                                                                                       | :WDR23                       | 80344  | -2.329373 | 0.685365 |
| 57516_at    | :zinc finger protein 764                                                                                                   | :ZNF764                      | 92595  | -2.3302   | 0.685365 |
| 211673_s_at | :molybdenum cofactor synthesis 1                                                                                           | :MOCS1                       | 4337   | -2.330765 | 0.685365 |
| 202009_at   | :twinfilin, actin-binding protein, homolog 2 (Drosophila)                                                                  | :TWF2                        | 11344  | -2.330858 | 0.685365 |
| 212739_s_at | :non-metastatic cells 4, protein expressed in                                                                              | :NME4                        | 4833   | -2.331026 | 0.685365 |
| 215379_x_at | :immunoglobulin lambda locus /// immunoglobulin lambda variable 3-25 /// immunoglobulin lambda IGL@ /// IGLJ 28793 /// 288 | ---                          | ---    | -2.333067 | 0.685365 |

Supplementary Table 5: Jurakt cells stimulated with PD-1/CD3/CD28 vs. CD3/CD28

|             |                                                                                                                                 |           |        |           |          |
|-------------|---------------------------------------------------------------------------------------------------------------------------------|-----------|--------|-----------|----------|
| 218137_s_at | stromal membrane-associated protein 1                                                                                           | SMAP1     | 60682  | -2.333254 | 0.685365 |
| 209582_s_at | CD200 molecule                                                                                                                  | CD200     | 4345   | -2.333521 | 0.685365 |
| 203637_s_at | midline 1 (Opitz/BBB syndrome)                                                                                                  | MID1      | 4281   | -2.333611 | 0.685365 |
| 201802_at   | solute carrier family 29 (nucleoside transporters), member 1                                                                    | SLC29A1   | 2030   | -2.334749 | 0.685365 |
| 218813_s_at | SH3-domain GRB2-like endophilin B2                                                                                              | SH3GLB2   | 56904  | -2.334893 | 0.685365 |
| 202571_s_at | discs. large (Drosophila) homolog-associated protein 4                                                                          | DLGAP4    | 22839  | -2.3351   | 0.685365 |
| 209006_s_at | chromosome 1 open reading frame 63                                                                                              | C1orf63   | 57035  | -2.335214 | 0.685365 |
| 220743_at   | ---                                                                                                                             | ---       | ---    | -2.33566  | 0.685365 |
| 215113_s_at | SUMO1/sentrin/SMT3 specific peptidase 3                                                                                         | SEN3      | 26168  | -2.336442 | 0.685365 |
| 214550_s_at | transportin 3                                                                                                                   | TNPO3     | 23534  | -2.338635 | 0.685365 |
| 214614_at   | motor neuron and pancreas homeobox 1                                                                                            | MNX1      | 3110   | -2.338754 | 0.685365 |
| 210500_at   | ---                                                                                                                             | ---       | ---    | -2.338995 | 0.685365 |
| 218639_s_at | ZXD family zinc finger C                                                                                                        | ZXDC      | 79364  | -2.339756 | 0.685365 |
| 214738_s_at | NIMA (never in mitosis gene a)-related kinase 9                                                                                 | NEK9      | 91754  | -2.33984  | 0.685365 |
| 207635_s_at | potassium voltage-gated channel, subfamily H (eag-related), member 1                                                            | KCNH1     | 3756   | -2.340166 | 0.685365 |
| 221056_x_at | epidermal growth factor receptor pathway substrate 15-like 1                                                                    | EPS15L1   | 58513  | -2.340366 | 0.685365 |
| 217855_x_at | stromal cell derived factor 4                                                                                                   | SDF4      | 51150  | -2.342152 | 0.685365 |
| 201941_at   | carboxypeptidase D                                                                                                              | CPD       | 1362   | -2.343245 | 0.685365 |
| 203073_at   | component of oligomeric golgi complex 2                                                                                         | COG2      | 22796  | -2.344046 | 0.685365 |
| 210962_s_at | A kinase (PRKA) anchor protein (yotiao) 9                                                                                       | AKAP9     | 10142  | -2.34415  | 0.685365 |
| 216052_x_at | artemin                                                                                                                         | ARTN      | 9048   | -2.345033 | 0.685365 |
| 204043_at   | transcobalamin II; macrocytic anemia                                                                                            | TCN2      | 6948   | -2.346284 | 0.685365 |
| 210930_s_at | v-erb-b2 erythroblastic leukemia viral oncogene homolog 2, neuro/glioblastoma derived oncogene                                  | ERBB2     | 2064   | -2.348138 | 0.685365 |
| 218221_at   | aryl hydrocarbon receptor nuclear translocator                                                                                  | ARNT      | 405    | -2.348315 | 0.685365 |
| 201421_s_at | WD repeat domain 77                                                                                                             | WDR77     | 79084  | -2.349401 | 0.685365 |
| 219202_at   | rhomboid 5 homolog 2 (Drosophila)                                                                                               | RHBDF2    | 79651  | -2.349621 | 0.685365 |
| 220232_at   | stearoyl-CoA desaturase 5                                                                                                       | SCD5      | 79966  | -2.350153 | 0.685365 |
| 221404_at   | interleukin 1 family, member 6 (epsilon)                                                                                        | IL1F6     | 27179  | -2.350505 | 0.685365 |
| 206333_at   | musashi homolog 1 (Drosophila)                                                                                                  | MSI1      | 4440   | -2.350669 | 0.685365 |
| 218645_at   | zinc finger protein 277                                                                                                         | ZNF277    | 11179  | -2.352026 | 0.685365 |
| 201289_at   | cysteine-rich, angiogenic inducer, 61                                                                                           | CYR61     | 3491   | -2.352145 | 0.685365 |
| 221755_at   | EH domain binding protein 1-like 1                                                                                              | EHBP1L1   | 254102 | -2.352364 | 0.685365 |
| 219720_s_at | chromosome 14 open reading frame 118                                                                                            | C14orf118 | 55668  | -2.354206 | 0.685365 |
| 202054_s_at | aldehyde dehydrogenase 3 family, member A2                                                                                      | ALDH3A2   | 224    | -2.354724 | 0.685365 |
| 210741_at   | Rho guanine nucleotide exchange factor (GEF) 12                                                                                 | ARHGEF12  | 23365  | -2.355883 | 0.685365 |
| 208625_s_at | eukaryotic translation initiation factor 4 gamma, 1                                                                             | EIF4G1    | 1981   | -2.357007 | 0.685365 |
| 203620_s_at | FCH and double SH3 domains 2                                                                                                    | FCHSD2    | 9873   | -2.357986 | 0.685365 |
| 220060_s_at | chromosome 12 open reading frame 48                                                                                             | C12orf48  | 55010  | -2.359063 | 0.685365 |
| 212310_at   | melanoma inhibitory activity family, member 3                                                                                   | MIA3      | 375056 | -2.360437 | 0.685365 |
| 201689_s_at | tumor protein D52                                                                                                               | TPD52     | 7163   | -2.360594 | 0.685365 |
| 221314_at   | growth differentiation factor 9                                                                                                 | GDF9      | 2661   | -2.361871 | 0.685365 |
| 210463_x_at | TRM1 tRNA methyltransferase 1 homolog (S. cerevisiae)                                                                           | TRMT1     | 55621  | -2.362536 | 0.685365 |
| 219829_at   | integrin beta 1 binding protein (melusin) 2                                                                                     | ITGB1BP2  | 26548  | -2.36288  | 0.685365 |
| 211205_x_at | phosphatidylinositol-4-phosphate 5-kinase, type I, alpha                                                                        | PIP5K1A   | 8394   | -2.363046 | 0.685365 |
| 215217_at   | ---                                                                                                                             | ---       | ---    | -2.364227 | 0.685365 |
| 202642_s_at | transformation/transcription domain-associated protein                                                                          | TRRAP     | 8295   | -2.364658 | 0.685365 |
| 215847_at   | hypothetical protein LOC283755                                                                                                  | LOC283755 | 283755 | -2.365307 | 0.685365 |
| 216860_s_at | growth differentiation factor 11                                                                                                | GDF11     | 10220  | -2.365759 | 0.685365 |
| 207074_s_at | solute carrier family 18 (vesicular monoamine), member 1                                                                        | SLC18A1   | 6570   | -2.36641  | 0.685365 |
| 212387_at   | transcription factor 4                                                                                                          | TCF4      | 6925   | -2.366796 | 0.685365 |
| 206209_s_at | carbonic anhydrase IV                                                                                                           | CA4       | 762    | -2.368052 | 0.685365 |
| 209729_at   | growth arrest-specific 2 like 1                                                                                                 | GAS2L1    | 10634  | -2.369159 | 0.685365 |
| 215928_at   | CDNA FLJ12130 fis. clone MAMMA1000251                                                                                           | ---       | ---    | -2.36917  | 0.685365 |
| 200939_s_at | arginine-glutamic acid dipeptide (RE) repeats                                                                                   | RERE      | 473    | -2.369223 | 0.685365 |
| 203660_s_at | pericentrin (kendrin)                                                                                                           | PCNT      | 5116   | -2.370059 | 0.685365 |
| 218412_s_at | GTF2I repeat domain containing 1                                                                                                | GTF2IRD1  | 9569   | -2.371453 | 0.685365 |
| 221490_at   | ubiquitin associated protein 1                                                                                                  | UBAP1     | 51271  | -2.37163  | 0.685365 |
| 220095_at   | chromosome 9 open reading frame 39                                                                                              | C9orf39   | 54875  | -2.373883 | 0.685365 |
| 207205_at   | carcinoembryonic antigen-related cell adhesion molecule 4                                                                       | CEACAM4   | 1089   | -2.374159 | 0.685365 |
| 219481_at   | tetratricopeptide repeat domain 13                                                                                              | TTC13     | 79573  | -2.375585 | 0.685365 |
| 213845_at   | glutamate receptor, ionotropic, kainate 2                                                                                       | GRIK2     | 2898   | -2.375823 | 0.685365 |
| 212574_x_at | chromosome 19 open reading frame 6                                                                                              | C19orf6   | 91304  | -2.37745  | 0.685365 |
| 201542_at   | SAR1 gene homolog A (S. cerevisiae)                                                                                             | SARIA     | 56681  | -2.378148 | 0.685365 |
| 206470_at   | plexin C1                                                                                                                       | PLXNC1    | 10154  | -2.378448 | 0.685365 |
| 203764_at   | discs. large homolog 7 (Drosophila)                                                                                             | DLG7      | 9787   | -2.378796 | 0.685365 |
| 217935_s_at | ubiquinol-cytochrome c reductase complex chaperone. CBP3 homolog (yeast)                                                        | UQC       | 55245  | -2.378985 | 0.685365 |
| 208275_x_at | undifferentiated embryonic cell transcription factor 1                                                                          | UTF1      | 8433   | -2.379448 | 0.685365 |
| 212065_s_at | ubiquitin specific peptidase 34                                                                                                 | USP34     | 9736   | -2.3801   | 0.685365 |
| 221916_at   | neurofilament, light polypeptide 68kDa                                                                                          | NEFL      | 4747   | -2.380808 | 0.685365 |
| 211807_x_at | protocadherin gamma subfamily B, 5                                                                                              | PCDHGB5   | 56101  | -2.381777 | 0.685365 |
| 206845_s_at | ring finger protein 40                                                                                                          | RNF40     | 9810   | -2.38221  | 0.685365 |
| 212219_at   | proteasome (prosome, macropain) activator subunit 4                                                                             | PSME4     | 23198  | -2.382821 | 0.685365 |
| 209684_at   | Ras and Rab interactor 2                                                                                                        | RIN2      | 54453  | -2.386389 | 0.685365 |
| 213707_s_at | distal-less homeobox 5                                                                                                          | DLX5      | 1749   | -2.386812 | 0.685365 |
| 208619_at   | damage-specific DNA binding protein 1, 127kDa                                                                                   | DDB1      | 1642   | -2.3882   | 0.685365 |
| 218252_at   | cytoskeleton associated protein 2                                                                                               | CKAP2     | 26586  | -2.388424 | 0.685365 |
| 212846_at   | ribosomal RNA processing 1 homolog B (S. cerevisiae)                                                                            | RRP1B     | 23076  | -2.389091 | 0.685365 |
| 212072_s_at | casein kinase 2, alpha 1 polypeptide                                                                                            | CSNK2A1   | 1457   | -2.389376 | 0.685365 |
| 218596_at   | TBC1 domain family, member 13                                                                                                   | TBC1D13   | 54662  | -2.390208 | 0.685365 |
| 218918_at   | mannosidase, alpha, class 1C, member 1                                                                                          | MAN1C1    | 57134  | -2.39499  | 0.685365 |
| 44146_at    | glucocorticoid modulatory element binding protein 2                                                                             | GMEB2     | 26205  | -2.396197 | 0.685365 |
| 215119_at   | myosin XVI                                                                                                                      | MYO16     | 23026  | -2.397469 | 0.685365 |
| 214721_x_at | CDC42 effector protein (Rho GTPase binding), 4                                                                                  | CDC42EP4  | 23580  | -2.398135 | 0.685365 |
| 202798_at   | SEC24 related gene family, member B (S. cerevisiae)                                                                             | SEC24B    | 10427  | -2.398942 | 0.685365 |
| 218656_s_at | lipoma HMGIC fusion partner                                                                                                     | LHFP      | 10186  | -2.399281 | 0.685365 |
| 207575_at   | golgin-like protein /// golgi autoantigen, golgin subfamily a, 6 /// similar to Golgin subfamily A m:GOLGA /// GO 342096 /// 55 | ---       | ---    | -2.400009 | 0.685365 |

Supplementary Table 5: Jurakt cells stimulated with PD-1/CD3/CD28 vs. CD3/CD28

|             |                                                                                      |                             |        |           |          |
|-------------|--------------------------------------------------------------------------------------|-----------------------------|--------|-----------|----------|
| 210017_at   | mucoosa associated lymphoid tissue lymphoma translocation gene 1                     | MALT1                       | 10892  | -2.402101 | 0.685365 |
| 201929_s_at | plakophilin 4                                                                        | PKP4                        | 8502   | -2.402221 | 0.685365 |
| 218803_at   | checkpoint with forkhead and ring finger domains                                     | CHFR                        | 55743  | -2.403077 | 0.685365 |
| 219378_at   | NMDA receptor regulated 1-like                                                       | NARG1L                      | 79612  | -2.403949 | 0.685365 |
| 209929_s_at | inhibitor of kappa light polypeptide gene enhancer in B-cells. kinase gamma          | IKBKKG                      | 8517   | -2.405699 | 0.685365 |
| 214513_s_at | cAMP responsive element binding protein 1                                            | CREB1                       | 1385   | -2.406554 | 0.685365 |
| 202787_s_at | mitogen-activated protein kinase-activated protein kinase 3                          | MAPKAPK3                    | 7867   | -2.407131 | 0.685365 |
| 215104_at   | nuclear receptor interacting protein 2                                               | NRIP2                       | 83714  | -2.407308 | 0.685365 |
| 211555_s_at | guanylate cyclase 1, soluble, beta 3                                                 | GUCY1B3                     | 2983   | -2.408504 | 0.685365 |
| 207983_s_at | stromal antigen 2                                                                    | STAG2                       | 10735  | -2.409478 | 0.685365 |
| 211711_s_at | phosphatase and tensin homolog (mutated in multiple advanced cancers 1)              | PTEN                        | 5728   | -2.410335 | 0.685365 |
| 221038_at   | PRO1942                                                                              | ---                         | ---    | -2.41101  | 0.685365 |
| 212556_at   | scribbled homolog (Drosophila)                                                       | SCRIB                       | 23513  | -2.411883 | 0.685365 |
| 209784_s_at | jagged 2                                                                             | JAG2                        | 3714   | -2.412885 | 0.685365 |
| 213682_at   | nucleoporin 50kDa                                                                    | NUP50                       | 10762  | -2.413768 | 0.685365 |
| 213099_at   | angel homolog 1 (Drosophila)                                                         | ANGEL1                      | 23357  | -2.414372 | 0.685365 |
| 207020_at   | heat shock transcription factor 2 binding protein                                    | HSF2BP                      | 11077  | -2.415318 | 0.685365 |
| 200614_at   | clathrin, heavy chain (Hc)                                                           | CLTC                        | 1213   | -2.415906 | 0.685365 |
| 209000_s_at | septin 8                                                                             | 8-Sep                       | 23176  | -2.416741 | 0.685365 |
| 210318_at   | retinol binding protein 3, interstitial                                              | RBP3                        | 5949   | -2.421761 | 0.685365 |
| 211089_s_at | NIMA (never in mitosis gene a)-related kinase 3                                      | NEK3                        | 4752   | -2.422279 | 0.685365 |
| 59999_at    | hypoxia-inducible factor 1, alpha subunit inhibitor                                  | HIF1AN                      | 55662  | -2.423303 | 0.685365 |
| 212563_at   | block of proliferation 1 /// similar to block of proliferation 1                     | BOP1 /// LOC: 23246 /// 727 |        | -2.424067 | 0.685365 |
| 209055_s_at | CDC5 cell division cycle 5-like (S. pombe)                                           | CDC5L                       | 988    | -2.425212 | 0.685365 |
| 221733_s_at | G patch domain containing 4                                                          | GPATCH4                     | 54865  | -2.429712 | 0.685365 |
| 204894_s_at | amine oxidase, copper containing 3 (vascular adhesion protein 1)                     | AOC3                        | 8639   | -2.430867 | 0.685365 |
| 220819_at   | FERM domain containing 1                                                             | FRMD1                       | 79981  | -2.432723 | 0.685365 |
| 206110_at   | histone cluster 1, H3h                                                               | HIST1H3H                    | 8357   | -2.432928 | 0.685365 |
| 207317_s_at | calsequestrin 2 (cardiac muscle)                                                     | CASQ2                       | 845    | -2.43558  | 0.685365 |
| 214429_at   | myotubularin related protein 6                                                       | MTMR6                       | 9107   | -2.437402 | 0.685344 |
| 211913_s_at | c-mer proto-oncogene tyrosine kinase                                                 | MERTK                       | 10461  | -2.437435 | 0.685344 |
| 218595_s_at | HEAT repeat containing 1                                                             | HEATR1                      | 55127  | -2.437683 | 0.685344 |
| 201997_s_at | spen homolog, transcriptional regulator (Drosophila)                                 | SPEN                        | 23013  | -2.438393 | 0.685344 |
| 203471_s_at | pleckstrin                                                                           | PLEK                        | 5341   | -2.438571 | 0.685344 |
| 219318_x_at | mediator complex subunit 31                                                          | MED31                       | 51003  | -2.439188 | 0.685344 |
| 207391_s_at | phosphatidylinositol-4-phosphate 5-kinase, type I, alpha                             | PIPSK1A                     | 8394   | -2.439928 | 0.685344 |
| 221195_at   | PTD016 protein                                                                       | LOC51136                    | 51136  | -2.440993 | 0.685344 |
| 202314_at   | cytochrome P450, family 51, subfamily A, polypeptide 1                               | CYP51A1                     | 1595   | -2.44138  | 0.685344 |
| 211447_s_at | phosphodiesterase 4A, cAMP-specific (phosphodiesterase E2 dunce homolog, Drosophila) | PDE4A                       | 5141   | -2.441963 | 0.685344 |
| 220182_at   | solute carrier family 25 (mitochondrial carrier; phosphate carrier), member 23       | SLC25A23                    | 79085  | -2.442225 | 0.685344 |
| 220202_x_at | eukaryotic translation initiation factor 1                                           | EIF1                        | 10209  | -2.442766 | 0.685344 |
| 202819_s_at | transcription elongation factor B (SIII), polypeptide 3 (110kDa, elongin A)          | TCEB3                       | 6924   | -2.44313  | 0.685344 |
| 220325_at   | TAF7-like RNA polymerase II, TATA box binding protein (TBP)-associated factor, 50kDa | TAF7L                       | 54457  | -2.445122 | 0.685344 |
| 221853_s_at | NODAL modulator 1 /// NODAL modulator 2 /// NODAL modulator 3                        | NOMO1 /// NC 23420 /// 283  |        | -2.445609 | 0.685344 |
| 1494_f_at   | cytochrome P450, family 2, subfamily A, polypeptide 6                                | CYP2A6                      | 1548   | -2.446052 | 0.685344 |
| 211101_x_at | leukocyte immunoglobulin-like receptor, subfamily A (with TM domain), member 2       | LILRA2                      | 11027  | -2.446908 | 0.685344 |
| 201571_s_at | dCMP deaminase                                                                       | DCTD                        | 1635   | -2.449242 | 0.685344 |
| 204040_at   | ring finger protein 144A                                                             | RNF144A                     | 9781   | -2.449365 | 0.685344 |
| 214994_at   | apolipoprotein B mRNA editing enzyme, catalytic polypeptide-like 3F                  | APOBEC3F                    | 200316 | -2.449632 | 0.685344 |
| 206085_s_at | cystathionase (cystathionine gamma-lyase)                                            | CTH                         | 1491   | -2.452718 | 0.685344 |
| 211501_s_at | eukaryotic translation initiation factor 3, subunit B                                | EIF3B                       | 8662   | -2.452858 | 0.685344 |
| 218771_at   | pantothenate kinase 4                                                                | PANK4                       | 55229  | -2.454032 | 0.685344 |
| 215857_at   | nicalin homolog (zebrafish)                                                          | NCLN                        | 56926  | -2.454363 | 0.685344 |
| 210995_s_at | tripartite motif-containing 23                                                       | TRIM23                      | 373    | -2.455597 | 0.685344 |
| 217424_at   | MRNA; cDNA DKFZp434L098 (from clone DKFZp434L098)                                    | ---                         | ---    | -2.456005 | 0.685344 |
| 201282_at   | oxoglutarate (alpha-ketoglutarate) dehydrogenase (lipoamide)                         | OGDH                        | 4967   | -2.45629  | 0.685344 |
| 207254_at   | solute carrier family 15 (oligopeptide transporter), member 1                        | SLC15A1                     | 6564   | -2.457005 | 0.685344 |
| 200793_s_at | aconitase 2, mitochondrial                                                           | ACO2                        | 50     | -2.45721  | 0.685344 |
| 214310_s_at | zinc finger protein-like 1                                                           | ZFPL1                       | 7542   | -2.457213 | 0.685344 |
| 219904_at   | zinc finger and SCAN domain containing 5                                             | ZSCAN5                      | 79149  | -2.457399 | 0.685344 |
| 210754_s_at | v-yes-1 Yamaguchi sarcoma viral related oncogene homolog                             | LYN                         | 4067   | -2.457399 | 0.685344 |
| 208787_at   | mitochondrial ribosomal protein L3                                                   | MRPL3                       | 11222  | -2.458274 | 0.685344 |
| 221418_s_at | mediator complex subunit 16                                                          | MED16                       | 10025  | -2.45877  | 0.685344 |
| 219610_at   | Rho-guanine nucleotide exchange factor                                               | RGNEF                       | 64283  | -2.45887  | 0.685344 |
| 218782_s_at | ATPase family, AAA domain containing 2                                               | ATAD2                       | 29028  | -2.459308 | 0.685344 |
| 210473_s_at | G protein-coupled receptor 125                                                       | GPR125                      | 166647 | -2.459875 | 0.685344 |
| 201946_s_at | chaperonin containing TCP1, subunit 2 (beta)                                         | CCT2                        | 10576  | -2.45999  | 0.685344 |
| 209247_s_at | ATP-binding cassette, sub-family F (GCN20), member 2                                 | ABCF2                       | 10061  | -2.460919 | 0.685344 |
| 218236_s_at | protein kinase D3                                                                    | PRKD3                       | 23683  | -2.461095 | 0.685344 |
| 212306_at   | cytoplasmic linker associated protein 2                                              | CLASP2                      | 23122  | -2.461105 | 0.685344 |
| 214030_at   | hypothetical protein DKFZp667G2110                                                   | DKFZp667G21                 | 131544 | -2.461612 | 0.685344 |
| 215272_at   | transcriptional adaptor 3 (NGG1 homolog, yeast)-like                                 | TADA3L                      | 10474  | -2.462776 | 0.685344 |
| 215551_at   | estrogen receptor 1                                                                  | ESR1                        | 2099   | -2.462889 | 0.685344 |
| 222006_at   | Leucine zipper-EF-hand containing transmembrane protein 1                            | LETM1                       | 3954   | -2.463389 | 0.685344 |
| 212997_s_at | tousled-like kinase 2                                                                | TLK2                        | 11011  | -2.46341  | 0.685344 |
| 213049_at   | GTPase activating Rap/RanGAP domain-like 1                                           | GARNL1                      | 253959 | -2.464024 | 0.685344 |
| 208595_s_at | methyl-CpG binding domain protein 1                                                  | MBD1                        | 4152   | -2.464419 | 0.685344 |
| 201401_s_at | adrenergic, beta, receptor kinase 1                                                  | ADRBK1                      | 156    | -2.469221 | 0.685344 |
| 209390_at   | tuberous sclerosis 1                                                                 | TSC1                        | 7248   | -2.469378 | 0.685344 |
| 214604_at   | homeobox D11                                                                         | HOXD11                      | 3237   | -2.469687 | 0.685344 |
| 218189_s_at | N-acetylneuraminic acid synthase (sialic acid synthase)                              | NANS                        | 54187  | -2.47103  | 0.685344 |
| 211256_x_at | butyrophilin, subfamily 2, member A1                                                 | BTN2A1                      | 11120  | -2.471393 | 0.685344 |
| 213739_at   | CDNA clone IMAGE:4801297                                                             | ---                         | ---    | -2.472666 | 0.685344 |
| 203445_s_at | CTD (carboxy-terminal domain, RNA polymerase II, polypeptide A) small phosphatase 2  | CTDSP2                      | 10106  | -2.473639 | 0.685344 |
| 216251_s_at | tubulin tyrosine ligase-like family, member 12                                       | TTL12                       | 23170  | -2.474117 | 0.685344 |
| 202633_at   | topoisomerase (DNA) II binding protein 1                                             | TOPBP1                      | 11073  | -2.475946 | 0.685344 |

Supplementary Table 5: Jurakt cells stimulated with PD-1/CD3/CD28 vs. CD3/CD28

|              |                                                                                                 |                             |        |           |          |
|--------------|-------------------------------------------------------------------------------------------------|-----------------------------|--------|-----------|----------|
| 205273_s_at  | pitriylsin metallopeptidase 1                                                                   | PITRM1                      | 10531  | -2.47626  | 0.685344 |
| 214657_s_at  | Trophoblast-derived noncoding RNA                                                               | TncRNA                      | 283131 | -2.477821 | 0.685344 |
| 210060_at    | phosphodiesterase 6G. cGMP-specific. rod. gamma                                                 | PDE6G                       | 5148   | -2.478084 | 0.685344 |
| 218781_at    | structural maintenance of chromosomes 6                                                         | SMC6                        | 79677  | -2.479473 | 0.685344 |
| 203789_s_at  | sema domain. immunoglobulin domain (Ig). short basic domain. secreted. (semaphorin) 3C          | SEMA3C                      | 10512  | -2.47991  | 0.685344 |
| 217448_s_at  | TOX high mobility group box family member 4 /// similar to Epidermal Langerhans cell protein LC | LOC285412 /// 285412 /// 98 |        | -2.483929 | 0.685344 |
| 218131_s_at  | GATA zinc finger domain containing 2A                                                           | GATAD2A                     | 54815  | -2.484529 | 0.685344 |
| 218590_at    | chromosome 10 open reading frame 2                                                              | C10orf2                     | 56652  | -2.484853 | 0.685344 |
| 216300_x_at  | retinoic acid receptor. alpha                                                                   | RARA                        | 5914   | -2.48576  | 0.685344 |
| 202521_at    | CCCTC-binding factor (zinc finger protein)                                                      | CTCF                        | 10664  | -2.486121 | 0.685344 |
| 212015_x_at  | polypyrimidine tract binding protein 1                                                          | PTBP1                       | 5725   | -2.486965 | 0.685344 |
| 220824_at    | CDNA FLJ20123 fis. clone COL06041                                                               | ---                         | ---    | -2.488086 | 0.685344 |
| 210347_s_at  | B-cell CLL/lymphoma 11A (zinc finger protein)                                                   | BCL11A                      | 53335  | -2.488512 | 0.685344 |
| 204395_s_at  | G protein-coupled receptor kinase 5                                                             | GRK5                        | 2869   | -2.4902   | 0.685344 |
| 203566_s_at  | amylo-1. 6-glucosidase. 4-alpha-glucanotransferase (glycogen debranching enzyme. glycogen st    | AGL                         | 178    | -2.490899 | 0.685344 |
| 206510_at    | SIX homeobox 2                                                                                  | SIX2                        | 10736  | -2.49148  | 0.685344 |
| 208773_s_at  | ankyrin repeat and KH domain containing 1 /// ANKHD1-EIF4EBP3                                   | ANKHD1 /// A 404734 /// 54  |        | -2.493806 | 0.685344 |
| 208309_s_at  | mucosa associated lymphoid tissue lymphoma translocation gene 1                                 | MALT1                       | 10892  | -2.495158 | 0.685344 |
| 204797_s_at  | echinoderm microtubule associated protein like 1                                                | EML1                        | 2009   | -2.495162 | 0.685344 |
| 210144_at    | TBC1 domain family. member 22A                                                                  | TBC1D22A                    | 25771  | -2.495712 | 0.685344 |
| 207071_s_at  | aconitase 1. soluble                                                                            | ACO1                        | 48     | -2.496354 | 0.685344 |
| 202779_s_at  | ubiquitin-conjugating enzyme E2S /// similar to Ubiquitin-conjugating enzyme E2S (Ubiquitin-con | LOC731049 // 27338 /// 731  |        | -2.497197 | 0.685344 |
| 211502_s_at  | PFTAIRE protein kinase 1                                                                        | PFTK1                       | 5218   | -2.499433 | 0.685344 |
| 208029_s_at  | lysosomal associated protein transmembrane 4 beta                                               | LAPTM4B                     | 55353  | -2.499919 | 0.685344 |
| 203838_s_at  | tyrosine kinase. non-receptor. 2                                                                | TNK2                        | 10188  | -2.500086 | 0.685344 |
| 217007_s_at  | ADAM metallopeptidase domain 15                                                                 | ADAM15                      | 8751   | -2.501117 | 0.685344 |
| 206590_x_at  | dopamine receptor D2                                                                            | DRD2                        | 1813   | -2.502495 | 0.685344 |
| 206625_at    | peripherin 2 (retinal degeneration. slow)                                                       | PRPH2                       | 5961   | -2.50253  | 0.685344 |
| 209981_at    | cold shock domain containing C2. RNA binding                                                    | CSDC2                       | 27254  | -2.503751 | 0.685344 |
| 204822_at    | TTK protein kinase                                                                              | TTK                         | 7272   | -2.504792 | 0.685344 |
| 205921_s_at  | solute carrier family 6 (neurotransmitter transporter. taurine). member 6                       | SLC6A6                      | 6533   | -2.506431 | 0.685344 |
| 202861_at    | period homolog 1 (Drosophila)                                                                   | PER1                        | 5187   | -2.50714  | 0.685344 |
| 210110_x_at  | neuroblastoma breakpoint family. member 14 /// neuroblastoma breakpoint family. member 11       | LOC728980 // 200030 /// 25  |        | -2.507143 | 0.685344 |
| 221581_s_at  | linker for activation of T cells family. member 2                                               | LAT2                        | 7462   | -2.507961 | 0.685344 |
| 219016_at    | FAST kinase domains 5                                                                           | FASTKD5                     | 60493  | -2.5085   | 0.685344 |
| 209839_at    | dynamitin 3                                                                                     | DNM3                        | 26052  | -2.510319 | 0.685344 |
| 214220_s_at  | Alstrom syndrome 1                                                                              | ALMS1                       | 7840   | -2.510432 | 0.685344 |
| 215178_x_at  | N-acylsphingosine amidohydrolase (acid ceramidase)-like                                         | ASAHL                       | 27163  | -2.512118 | 0.685344 |
| 209186_at    | ATPase. Ca++ transporting. cardiac muscle. slow twitch 2                                        | ATP2A2                      | 488    | -2.512233 | 0.685344 |
| 204930_s_at  | BCL2/adenovirus E1B 19kDa interacting protein 1                                                 | BNIP1                       | 662    | -2.51369  | 0.685344 |
| 219749_at    | SH2 domain containing 4A                                                                        | SH2D4A                      | 63898  | -2.51425  | 0.685344 |
| 215976_at    | CDNA FLJ12040 fis. clone HEMBB1001944                                                           | ---                         | ---    | -2.514425 | 0.685344 |
| 205344_at    | chondroitin sulfate proteoglycan 5 (neuroglycan C)                                              | CSPG5                       | 10675  | -2.514819 | 0.685344 |
| 210014_x_at  | isocitrate dehydrogenase 3 (NAD+) beta                                                          | IDH3B                       | 3420   | -2.515182 | 0.685344 |
| 209295_at    | tumor necrosis factor receptor superfamily. member 10b                                          | TNFRSF10B                   | 8795   | -2.515933 | 0.685344 |
| 2101883_s_at | UDP-Gal:betaGlcNAc beta 1.4-galactosyltransferase. polypeptide 1                                | B4GALT1                     | 2683   | -2.516366 | 0.685344 |
| 202019_s_at  | LanC lantibiotic synthetase component C-like 1 (bacterial)                                      | LANCL1                      | 10314  | -2.517284 | 0.685344 |
| 210570_x_at  | mitogen-activated protein kinase 9                                                              | MAPK9                       | 5601   | -2.517319 | 0.685344 |
| 221571_at    | TNF receptor-associated factor 3                                                                | TRAF3                       | 7187   | -2.518109 | 0.685344 |
| 210243_s_at  | UDP-Gal:betaGlcNAc beta 1.4-galactosyltransferase. polypeptide 3                                | B4GALT3                     | 8703   | -2.519776 | 0.685344 |
| 212712_at    | calmodulin regulated spectrin-associated protein 1                                              | CAMSAP1                     | 157922 | -2.528222 | 0.685344 |
| 213552_at    | glucuronic acid epimerase                                                                       | GLCE                        | 26035  | -2.528502 | 0.685344 |
| 203048_s_at  | KIAA0372                                                                                        | KIAA0372                    | 9652   | -2.528676 | 0.685344 |
| 204647_at    | homer homolog 3 (Drosophila)                                                                    | HOMER3                      | 9454   | -2.528967 | 0.685344 |
| 210905_x_at  | POU class 5 homeobox 1 pseudogene 4                                                             | POU5F1P4                    | 645682 | -2.530453 | 0.685344 |
| 211133_x_at  | leukocyte immunoglobulin-like receptor. subfamily B (with TM and ITIM domains). member 3        | LILRB3                      | 11025  | -2.531278 | 0.685344 |
| 202111_at    | solute carrier family 4. anion exchanger. member 2 (erythrocyte membrane protein band 3-like)   | SLC4A2                      | 6522   | -2.531979 | 0.685344 |
| 209380_s_at  | ATP-binding cassette. sub-family C (CFTR/MRP). member 5                                         | ABCC5                       | 10057  | -2.533885 | 0.685344 |
| 212713_at    | microfibrillar-associated protein 4                                                             | MFAP4                       | 4239   | -2.534089 | 0.685344 |
| 214748_at    | phosphonofornate immuno-associated protein 5                                                    | RP11-298P3.3                | 10443  | -2.539163 | 0.685344 |
| 221226_s_at  | amiloride-sensitive cation channel 4. pituitary                                                 | ACCN4                       | 55515  | -2.543363 | 0.685344 |
| 219390_at    | FK506 binding protein 14. 22 kDa                                                                | FKBP14                      | 55033  | -2.544849 | 0.685344 |
| 212542_s_at  | pleckstrin homology domain interacting protein                                                  | PHIP                        | 55023  | -2.546445 | 0.685344 |
| 212568_s_at  | dihydroliipoamide S-acetyltransferase (E2 component of pyruvate dehydrogenase complex)          | DLAT                        | 1737   | -2.547529 | 0.685344 |
| 202661_at    | inositol 1.4.5-triphosphate receptor. type 2                                                    | ITPR2                       | 3709   | -2.548146 | 0.685344 |
| 201013_s_at  | phosphoribosylaminoimidazole carboxylase. phosphoribosylaminoimidazole succinocarboxamide       | PAICS                       | 10606  | -2.549691 | 0.685344 |
| 221317_x_at  | protocadherin beta 6                                                                            | PCDH6                       | 56130  | -2.550375 | 0.685344 |
| 218277_s_at  | DEAH (Asp-Glu-Ala-His) box polypeptide 40                                                       | DHX40                       | 79665  | -2.552392 | 0.685223 |
| 210270_at    | regulator of G-protein signaling 6                                                              | RGS6                        | 9628   | -2.554586 | 0.684643 |
| 54632_at     | thyroid adenoma associated                                                                      | THADA                       | 63892  | -2.554923 | 0.684643 |
| 217293_at    | ---                                                                                             | ---                         | ---    | -2.555509 | 0.684643 |
| 217564_s_at  | carbamoyl-phosphate synthetase 1. mitochondrial                                                 | CPS1                        | 1373   | -2.556778 | 0.684175 |
| 49111_at     | MRNA; cDNA DKFzP762M127 (from clone DKFzP762M127)                                               | ---                         | ---    | -2.559232 | 0.682811 |
| 218081_at    | chromosome 20 open reading frame 27                                                             | C20orf27                    | 54976  | -2.559438 | 0.682811 |
| 221893_s_at  | aarF domain containing kinase 2                                                                 | ADCK2                       | 90956  | -2.559819 | 0.682811 |
| 210542_s_at  | solute carrier organic anion transporter family. member 3A1                                     | SLC03A1                     | 28232  | -2.561301 | 0.682811 |
| 214161_at    | Oxidative stress induced growth inhibitor family member 2                                       | OSGIN2                      | 734    | -2.567061 | 0.680212 |
| 221253_s_at  | thioredoxin domain containing 5                                                                 | TXNDC5                      | 81567  | -2.569194 | 0.680212 |
| 203889_at    | secretogranin V (7B2 protein)                                                                   | SCG5                        | 6447   | -2.569349 | 0.680212 |
| 205003_at    | dedicator of cytokinesis 4                                                                      | DOCK4                       | 9732   | -2.570368 | 0.680212 |
| 217716_s_at  | Sec61 alpha 1 subunit (S. cerevisiae)                                                           | SEC61A1                     | 29927  | -2.573388 | 0.679125 |
| 218768_at    | nucleoporin 107kDa                                                                              | NUP107                      | 57122  | -2.573555 | 0.679125 |
| 207174_at    | glypican 5                                                                                      | GPC5                        | 2262   | -2.576361 | 0.678698 |
| 214626_s_at  | glucosidase. alpha; neutral AB                                                                  | GANAB                       | 23193  | -2.578552 | 0.677955 |
| 202715_at    | carbamoyl-phosphate synthetase 2. aspartate transcarbamylase. and dihydroorotase                | CAD                         | 790    | -2.579188 | 0.677955 |
| 219432_at    | ---                                                                                             | ---                         | ---    | -2.580033 | 0.677769 |



Supplementary Table 5: Jurakt cells stimulated with PD-1/CD3/CD28 vs. CD3/CD28

|             |                                                                                               |                             |               |           |          |
|-------------|-----------------------------------------------------------------------------------------------|-----------------------------|---------------|-----------|----------|
| 208065_at   | ST8 alpha-N-acetyl-neuraminide alpha-2.8-sialyltransferase 3                                  | ST8SIA3                     | 51046         | -2.581146 | 0.677769 |
| 213270_at   | membrane protein, palmitoylated 2 (MAGUK p55 subfamily member 2)                              | MPP2                        | 4355          | -2.582229 | 0.677769 |
| 212457_at   | transcription factor binding to IGHM enhancer 3                                               | TFE3                        | 7030          | -2.582827 | 0.677769 |
| 218044_x_at | parathyrosin                                                                                  | PTMS                        | 5763          | -2.582927 | 0.677769 |
| 204545_at   | peroxisomal biogenesis factor 6                                                               | PEX6                        | 5190          | -2.585253 | 0.677769 |
| 218355_at   | kinesin family member 4A /// kinesin family member 4B                                         | KIF4A /// KIF4              | 24137 /// 285 | -2.586005 | 0.677769 |
| 211062_s_at | carboxypeptidase Z                                                                            | CPZ                         | 8532          | -2.586752 | 0.677769 |
| 206099_at   | protein kinase C, eta                                                                         | PRKCH                       | 5583          | -2.587293 | 0.677769 |
| 203286_at   | ring finger protein 44                                                                        | RNF44                       | 22838         | -2.587358 | 0.677769 |
| 210005_at   | phosphoribosylglycinamide formyltransferase, phosphoribosylglycinamide synthetase, phosphorib | GART                        | 2618          | -2.588878 | 0.677769 |
| 214290_s_at | histone cluster 2, H2aa3 /// histone cluster 2, H2aa4                                         | HIST2H2AA3 , 723790 /// 83  |               | -2.589673 | 0.677769 |
| 216913_s_at | ribosomal RNA processing 12 homolog (S. cerevisiae)                                           | RRP12                       | 23223         | -2.590475 | 0.677769 |
| 214056_at   | Myeloid cell leukemia sequence 1 (BCL2-related)                                               | MCL1                        | 4170          | -2.59162  | 0.677769 |
| 222192_s_at | chromosome 2 open reading frame 43                                                            | C2orf43                     | 60526         | -2.592113 | 0.677769 |
| 202672_s_at | activating transcription factor 3                                                             | ATF3                        | 467           | -2.59414  | 0.677769 |
| 222114_x_at | WD repeat domain 55                                                                           | WDR55                       | 54853         | -2.594462 | 0.677769 |
| 219271_at   | UDP-N-acetyl-alpha-D-galactosamine:polypeptide N-acetylgalactosaminyltransferase 14 (GalNAc   | GALNT14                     | 79623         | -2.596929 | 0.677769 |
| 217635_s_at | polymerase (DNA directed), gamma                                                              | POLG                        | 5428          | -2.596945 | 0.677769 |
| 211271_x_at | polypyrimidine tract binding protein 1                                                        | PTBP1                       | 5725          | -2.597433 | 0.677769 |
| 218308_at   | transforming, acidic coiled-coil containing protein 3                                         | TACC3                       | 10460         | -2.597859 | 0.677769 |
| 219410_at   | transmembrane protein 45A                                                                     | TMEM45A                     | 55076         | -2.599313 | 0.677769 |
| 202189_x_at | polypyrimidine tract binding protein 1                                                        | PTBP1                       | 5725          | -2.599966 | 0.677769 |
| 211851_x_at | breast cancer 1, early onset                                                                  | BRCA1                       | 672           | -2.600013 | 0.677769 |
| 210052_s_at | TPX2, microtubule-associated, homolog (Xenopus laevis)                                        | TPX2                        | 22974         | -2.600916 | 0.677769 |
| 220357_s_at | serum/glucocorticoid regulated kinase 2                                                       | SGK2                        | 10110         | -2.601453 | 0.677769 |
| 213073_at   | zinc finger, FYVE domain containing 26                                                        | ZFYVE26                     | 23503         | -2.602283 | 0.677769 |
| 209822_s_at | very low density lipoprotein receptor                                                         | VLDLR                       | 7436          | -2.602789 | 0.677769 |
| 203154_s_at | p21(CDKN1A)-activated kinase 4                                                                | PAK4                        | 10298         | -2.604554 | 0.677769 |
| 217771_at   | golgi membrane protein 1                                                                      | GOLM1                       | 51280         | -2.607065 | 0.677769 |
| 203879_at   | phosphoinositide-3-kinase, catalytic, delta polypeptide                                       | PIK3CD                      | 5293          | -2.60731  | 0.677769 |
| 207000_s_at | protein phosphatase 3 (formerly 2B), catalytic subunit, gamma isoform                         | PPP3CC                      | 5533          | -2.608889 | 0.677769 |
| 202195_s_at | transmembrane emp24 protein transport domain containing 5                                     | TMED5                       | 50999         | -2.609134 | 0.677769 |
| 220599_s_at | caspase recruitment domain family, member 14                                                  | CARD14                      | 79092         | -2.609842 | 0.677769 |
| 204153_s_at | MFNG O-fucosylpeptide 3-beta-N-acetylglucosaminyltransferase                                  | MFNG                        | 4242          | -2.612307 | 0.677769 |
| 208591_s_at | phosphodiesterase 3B, cGMP-inhibited                                                          | PDE3B                       | 5140          | -2.612962 | 0.677769 |
| 210269_s_at | splicing factor, arginine/serine-rich 17A                                                     | SFRS17A                     | 8227          | -2.614108 | 0.677769 |
| 221443_x_at | prolactin releasing hormone                                                                   | PRLH                        | 51052         | -2.614455 | 0.677769 |
| 219126_at   | PHD finger protein 10                                                                         | PHF10                       | 55274         | -2.615397 | 0.677769 |
| 206550_s_at | nucleoporin 155kDa                                                                            | NUP155                      | 9631          | -2.615577 | 0.677769 |
| 218783_at   | integrator complex subunit 7                                                                  | INTS7                       | 25896         | -2.6159   | 0.677769 |
| 211136_s_at | cleft lip and palate associated transmembrane protein 1                                       | CLPTM1                      | 1209          | -2.615969 | 0.677769 |
| 211258_s_at | transforming growth factor, alpha                                                             | TGFA                        | 7039          | -2.616477 | 0.677769 |
| 213656_s_at | kinesin light chain 1                                                                         | KLC1                        | 3831          | -2.61871  | 0.677769 |
| 218765_at   | SID1 transmembrane family, member 2                                                           | SIDT2                       | 51092         | -2.621293 | 0.677769 |
| 209260_at   | stratifyn                                                                                     | SFN                         | 2810          | -2.623495 | 0.677769 |
| 206471_s_at | plexin C1                                                                                     | PLXNC1                      | 10154         | -2.624523 | 0.677769 |
| 215827_x_at | ciliary rootlet coiled-coil, rootletin-like 2                                                 | CROCC2                      | 114819        | -2.625228 | 0.677769 |
| 212248_at   | CDNA FLJ41088 fis. clone ASTRO2002459 /// Metadherin                                          | MTDH                        | 92140         | -2.627065 | 0.677769 |
| 220826_at   | chromosome 21 open reading frame 77                                                           | C21orf77                    | 55264         | -2.62745  | 0.677769 |
| 201344_at   | ubiquitin-conjugating enzyme E2D 2 (UBC4/5 homolog, yeast)                                    | UBE2D2                      | 7322          | -2.629755 | 0.677769 |
| 216294_s_at | KIAA1109                                                                                      | KIAA1109                    | 84162         | -2.630419 | 0.677769 |
| 214364_at   | MTERF domain containing 2                                                                     | MTERFD2                     | 130916        | -2.633407 | 0.677769 |
| 219745_at   | transmembrane protein 180                                                                     | TMEM180                     | 79847         | -2.633861 | 0.677769 |
| 202184_s_at | nucleoporin 133kDa                                                                            | NUP133                      | 55746         | -2.634026 | 0.677769 |
| 220607_x_at | TH1-like (Drosophila)                                                                         | TH1L                        | 51497         | -2.634134 | 0.677769 |
| 206074_s_at | high mobility group AT-hook 1                                                                 | HMG1                        | 3159          | -2.634337 | 0.677769 |
| 217305_s_at | testicular soluble adenylyl cyclase                                                           | SAC                         | 55811         | -2.638782 | 0.677769 |
| 203961_at   | nebulin                                                                                       | NEBL                        | 10529         | -2.64196  | 0.677769 |
| 218331_s_at | chromosome 10 open reading frame 18                                                           | C10orf18                    | 54906         | -2.643984 | 0.677769 |
| 201662_s_at | acyl-CoA synthetase long-chain family member 3                                                | ACSL3                       | 2181          | -2.644598 | 0.677769 |
| 203701_s_at | TRM1 tRNA methyltransferase 1 homolog (S. cerevisiae)                                         | TRMT1                       | 55621         | -2.646432 | 0.677769 |
| 200662_s_at | translocase of outer mitochondrial membrane 20 homolog (yeast)                                | TOMM20                      | 9804          | -2.647788 | 0.677769 |
| 203991_s_at | ubiquitously transcribed tetratricopeptide repeat, X chromosome                               | UTX                         | 7403          | -2.64886  | 0.677769 |
| 209859_at   | tripartite motif-containing 9                                                                 | TRIM9                       | 114088        | -2.64996  | 0.677769 |
| 205794_s_at | neuro-oncological ventral antigen 1                                                           | NOVA1                       | 4857          | -2.650414 | 0.677769 |
| 212074_at   | unc-84 homolog A (C. elegans)                                                                 | UNC84A                      | 23353         | -2.653991 | 0.677769 |
| 36545_s_at  | Sfi1 homolog, spindle assembly associated (yeast)                                             | SFI1                        | 9814          | -2.654315 | 0.677769 |
| 221632_s_at | WD repeat domain 4                                                                            | WDR4                        | 10785         | -2.654646 | 0.677769 |
| 215317_at   | CDNA FLJ37610 fis. clone BRCOC2011398                                                         | ---                         | ---           | -2.655751 | 0.677769 |
| 205520_at   | striatin, calmodulin binding protein                                                          | STRN                        | 6801          | -2.656257 | 0.677769 |
| 216332_at   | POU class 6 homeobox 1                                                                        | POU6F1                      | 5463          | -2.656899 | 0.677769 |
| 215642_at   | Clone HQ0085                                                                                  | ---                         | ---           | -2.657265 | 0.677769 |
| 205996_s_at | adenylate kinase 2                                                                            | AK2                         | 204           | -2.659454 | 0.677769 |
| 218139_s_at | chromosome 14 open reading frame 108                                                          | C14orf108                   | 55745         | -2.65994  | 0.677769 |
| 211068_x_at | family with sequence similarity 21, member C /// family with sequence similarity 21, member D | FAM21C /// Ff 253725 /// 65 |               | -2.662309 | 0.677769 |
| 209824_s_at | aryl hydrocarbon receptor nuclear translocator-like                                           | ARNTL                       | 406           | -2.662397 | 0.677769 |
| 212963_at   | TM2 domain containing 1                                                                       | TM2D1                       | 83941         | -2.663311 | 0.677769 |
| 202188_at   | nucleoporin 93kDa                                                                             | NUP93                       | 9688          | -2.663453 | 0.677769 |
| 219822_at   | mitochondrial translational release factor 1                                                  | MTRF1                       | 9617          | -2.665183 | 0.677769 |
| 200690_at   | heat shock 70kDa protein 9 (mortalin)                                                         | HSPA9                       | 3313          | -2.665411 | 0.677769 |
| 205963_s_at | DnaJ (Hsp40) homolog, subfamily A, member 3                                                   | DNAJA3                      | 9093          | -2.666504 | 0.677769 |
| 205867_at   | protein tyrosine phosphatase, non-receptor type 11 (Noonan syndrome 1)                        | PTPN11                      | 5781          | -2.666885 | 0.677769 |
| 203929_s_at | microtubule-associated protein tau                                                            | MAPT                        | 4137          | -2.667747 | 0.677769 |
| 204702_s_at | nuclear factor (erythroid-derived 2)-like 3                                                   | NFE2L3                      | 9603          | -2.667883 | 0.677769 |
| 204473_s_at | zinc finger protein 592                                                                       | ZNF592                      | 9640          | -2.675603 | 0.677769 |
| 204079_at   | tyrosylprotein sulfotransferase 2                                                             | TPST2                       | 8459          | -2.675921 | 0.677769 |

Supplementary Table 5: Jurakt cells stimulated with PD-1/CD3/CD28 vs. CD3/CD28

|             |                                                                                                          |                         |               |           |          |
|-------------|----------------------------------------------------------------------------------------------------------|-------------------------|---------------|-----------|----------|
| 218124_at   | retinol saturase (all-trans-retinol 13.14-reductase)                                                     | RETSAT                  | 54884         | -2.677667 | 0.677769 |
| 206720_at   | mannosyl (alpha-1.6-)-glycoprotein beta-1.6-N-acetyl-glucosaminyltransferase                             | MGAT5                   | 4249          | -2.680582 | 0.677769 |
| 207046_at   | histone cluster 2. H4a /// histone cluster 2. H4b                                                        | HIST2H4A ///            | 554313 /// 83 | -2.681133 | 0.677769 |
| 204677_at   | cadherin 5, type 2. VE-cadherin (vascular epithelium)                                                    | CDH5                    | 1003          | -2.681451 | 0.677769 |
| 215099_s_at | retinoid X receptor, beta                                                                                | RXRβ                    | 6257          | -2.682345 | 0.677769 |
| 215870_s_at | phospholipase A2, group V                                                                                | PLA2G5                  | 5322          | -2.683809 | 0.677769 |
| 215849_x_at | CDNA FLJ12173 fis. clone MAMMA1000696                                                                    | ---                     | ---           | -2.683929 | 0.677769 |
| 202220_at   | KIAA0907                                                                                                 | KIAA0907                | 22889         | -2.686147 | 0.677769 |
| 217900_at   | isoleucyl-tRNA synthetase 2, mitochondrial                                                               | IARS2                   | 55699         | -2.686714 | 0.677769 |
| 201000_at   | alanyl-tRNA synthetase                                                                                   | AARS                    | 16            | -2.689408 | 0.677769 |
| 37079_at    | YDD19 protein                                                                                            | YDD19                   | 11049         | -2.689782 | 0.677769 |
| 212118_at   | tripartite motif-containing 27                                                                           | TRIM27                  | 5987          | -2.690117 | 0.677769 |
| 209336_at   | PWP2 periodic tryptophan protein homolog (yeast)                                                         | PWP2                    | 5822          | -2.690979 | 0.677769 |
| 222245_s_at | fer-1-like 4 (C. elegans)                                                                                | FER1L4                  | 80307         | -2.692154 | 0.677769 |
| 204089_x_at | mitogen-activated protein kinase kinase 4                                                                | MAP3K4                  | 4216          | -2.692314 | 0.677769 |
| 206473_at   | membrane-bound transcription factor peptidase, site 2                                                    | MBTPS2                  | 51360         | -2.692555 | 0.677769 |
| 209615_s_at | p21/Cdc42/Rac1-activated kinase 1 (STE20 homolog, yeast)                                                 | PAK1                    | 5058          | -2.692753 | 0.677769 |
| 217168_s_at | homocysteine-inducible, endoplasmic reticulum stress-inducible, ubiquitin-like domain member 1           | HERPUD1                 | 9709          | -2.694847 | 0.677769 |
| 217399_s_at | forkhead box O3                                                                                          | FOXO3                   | 2309          | -2.695697 | 0.677769 |
| 202491_s_at | inhibitor of kappa light polypeptide gene enhancer in B-cells, kinase complex-associated protein         | IKBKAP                  | 8518          | -2.695956 | 0.677769 |
| 215513_at   | hydrotidiform mole associated and imprinted                                                              | HYMAI                   | 57061         | -2.697634 | 0.677769 |
| 208700_s_at | transketolase (Wernicke-Korsakoff syndrome)                                                              | TKT                     | 7086          | -2.698039 | 0.677769 |
| 206499_s_at | regulator of chromosome condensation 1 /// SNHG3-RCC1                                                    | RCC1 /// SNH            | 1104 /// 7518 | -2.698862 | 0.677769 |
| 201697_s_at | DNA (cytosine-5-)-methyltransferase 1                                                                    | DNMT1                   | 1786          | -2.699453 | 0.677769 |
| 212949_at   | non-SMC condensin I complex, subunit H                                                                   | NCAPH                   | 23397         | -2.70129  | 0.677769 |
| 212338_at   | myosin ID                                                                                                | MYO1D                   | 4642          | -2.703924 | 0.677769 |
| 215167_at   | mediator complex subunit 14                                                                              | MED14                   | 9282          | -2.704087 | 0.677769 |
| 213092_x_at | DnaJ (Hsp40) homolog, subfamily C, member 9                                                              | DNAJC9                  | 23234         | -2.704277 | 0.677769 |
| 201973_s_at | chromosome 7 open reading frame 28A                                                                      | C7orf28A                | 51622         | -2.706342 | 0.677769 |
| 201746_at   | tumor protein p53 (Li-Fraumeni syndrome)                                                                 | TP53                    | 7157          | -2.707826 | 0.677769 |
| 218125_s_at | coiled-coil domain containing 25                                                                         | CCDC25                  | 55246         | -2.709459 | 0.677769 |
| 207891_s_at | UCHL5 interacting protein                                                                                | UCHL5IP                 | 55559         | -2.710299 | 0.677769 |
| 222132_s_at | acylglycerol kinase                                                                                      | AGK                     | 55750         | -2.711142 | 0.677769 |
| 203223_at   | rabaptin, RAB GTPase binding effector protein 1                                                          | RABEP1                  | 9135          | -2.712777 | 0.677769 |
| 203050_at   | tumor protein p53 binding protein 1                                                                      | TP53BP1                 | 7158          | -2.714858 | 0.677769 |
| 210512_s_at | vascular endothelial growth factor A                                                                     | VEGFA                   | 7422          | -2.718555 | 0.677769 |
| 214448_x_at | nuclear factor of kappa light polypeptide gene enhancer in B-cells inhibitor, beta                       | NFKB1B                  | 4793          | -2.720854 | 0.677769 |
| 202176_at   | excision repair cross-complementing rodent repair deficiency, complementation group 3 (xeroder)          | ERCC3                   | 2071          | -2.724266 | 0.677769 |
| 217786_at   | protein arginine methyltransferase 5                                                                     | PRMT5                   | 10419         | -2.724482 | 0.677769 |
| 212389_at   | SET binding factor 1                                                                                     | SBF1                    | 6305          | -2.725384 | 0.677769 |
| 207061_at   | endoplasmic reticulum to nucleus signaling 1                                                             | ERN1                    | 2081          | -2.727189 | 0.677769 |
| 217944_at   | protein O-linked mannose beta1.2-N-acetylglucosaminyltransferase                                         | POMGNT1                 | 55624         | -2.727284 | 0.677769 |
| 202855_s_at | solute carrier family 16, member 3 (monocarboxylic acid transporter 4)                                   | SLC16A3                 | 9123          | -2.730027 | 0.677769 |
| 222235_s_at | chondroitin sulfate GalNAcT-2                                                                            | GALNAcT-2               | 55454         | -2.732504 | 0.677769 |
| 210398_x_at | fucosyltransferase 6 (alpha (1.3) fucosyltransferase)                                                    | FUT6                    | 2528          | -2.732506 | 0.677769 |
| 204817_at   | extra spindle pole bodies homolog 1 (S. cerevisiae)                                                      | ESPL1                   | 9700          | -2.732787 | 0.677769 |
| 212316_at   | nucleoporin 210kDa                                                                                       | NUP210                  | 23225         | -2.733436 | 0.677769 |
| 215230_x_at | eukaryotic translation initiation factor 3, subunit C /// eukaryotic translation initiation factor 3, su | EIF3C /// EIF3          | 728689 /// 86 | -2.735905 | 0.677769 |
| 219278_at   | mitogen-activated protein kinase kinase 6                                                                | MAP3K6                  | 9064          | -2.737079 | 0.677769 |
| 212025_s_at | flightless I homolog (Drosophila)                                                                        | FLII                    | 2314          | -2.742227 | 0.677769 |
| 203226_s_at | tetraspanin 31                                                                                           | TSPAN31                 | 6302          | -2.743346 | 0.677769 |
| 202013_s_at | extostoses (multiple) 2                                                                                  | EXT2                    | 2132          | -2.745667 | 0.677769 |
| 208923_at   | cytoplasmic FMR1 interacting protein 1                                                                   | CYFIP1                  | 23191         | -2.746498 | 0.677769 |
| 211279_at   | nuclear respiratory factor 1                                                                             | NRF1                    | 4899          | -2.74745  | 0.677769 |
| 213199_at   | C2 calcium-dependent domain containing 3                                                                 | C2CD3                   | 26005         | -2.748129 | 0.677769 |
| 215332_s_at | CD8b molecule                                                                                            | CD8B                    | 926           | -2.748315 | 0.677769 |
| 218973_at   | elongation factor Tu GTP binding domain containing 1                                                     | EFTUD1                  | 79631         | -2.748594 | 0.677769 |
| 207648_at   | dystrophin related protein 2                                                                             | DRP2                    | 1821          | -2.748618 | 0.677769 |
| 210076_x_at | SERPINE1 mRNA binding protein 1                                                                          | SERPBP1                 | 26135         | -2.754077 | 0.677769 |
| 207387_s_at | glycerol kinase                                                                                          | GK                      | 2710          | -2.755004 | 0.677769 |
| 220634_at   | T-box 4                                                                                                  | TBX4                    | 9496          | -2.759779 | 0.677769 |
| 222231_s_at | leucine rich repeat containing 59                                                                        | LRRC59                  | 55379         | -2.761272 | 0.677651 |
| 212667_at   | secreted protein, acidic, cysteine-rich (osteonectin)                                                    | SPARC                   | 6678          | -2.761438 | 0.677651 |
| 215781_s_at | topoisomerase (DNA) III beta                                                                             | TOP3B                   | 8940          | -2.761458 | 0.677651 |
| 219705_at   | glutamine and serine rich 1                                                                              | QSER1                   | 79832         | -2.761468 | 0.677651 |
| 206129_s_at | arylsulfatase B                                                                                          | ARSB                    | 411           | -2.766572 | 0.676577 |
| 216692_at   | MRNA; cDNA DKFZp761N1323 (from clone DKFZp761N1323)                                                      | ---                     | ---           | -2.76672  | 0.676577 |
| 211543_s_at | G protein-coupled receptor kinase 6                                                                      | GRK6                    | 2870          | -2.769131 | 0.675594 |
| 212749_s_at | ring finger and CHY zinc finger domain containing 1                                                      | RCHY1                   | 25898         | -2.771994 | 0.67416  |
| 215760_s_at | strawberry notch homolog 2 (Drosophila)                                                                  | SBNO2                   | 22904         | -2.772749 | 0.67416  |
| 214130_s_at | phosphodiesterase 4D interacting protein (myomegalin) /// similar to phosphodiesterase 4D inter          | LOC727942 // 727942 /// | 96            | -2.774869 | 0.673001 |
| 207359_at   | calcium/calmodulin-dependent protein kinase kinase 2, beta                                               | CAMKK2                  | 10645         | -2.775901 | 0.672775 |
| 201819_at   | scavenger receptor class B, member 1                                                                     | SCARB1                  | 949           | -2.77658  | 0.672775 |
| 208438_s_at | Gardner-Rasheed feline sarcoma viral (v-fgr) oncogene homolog                                            | FGR                     | 2268          | -2.777808 | 0.672775 |
| 213097_s_at | zootin related factor 1                                                                                  | ZRF1                    | 27000         | -2.782801 | 0.670898 |
| 202395_at   | N-ethylmaleimide-sensitive factor                                                                        | NSF                     | 4905          | -2.782939 | 0.670898 |
| 204272_at   | lectin, galactoside-binding, soluble, 4 (galectin 4)                                                     | LGALS4                  | 3960          | -2.782974 | 0.670898 |
| 218594_at   | HEAT repeat containing 1                                                                                 | HEATR1                  | 55127         | -2.783348 | 0.670898 |
| 219270_at   | ChaC, cation transport regulator homolog 1 (E. coli)                                                     | CHAC1                   | 79094         | -2.783922 | 0.670898 |
| 221156_x_at | cell cycle progression 1                                                                                 | CCPG1                   | 9236          | -2.785387 | 0.670898 |
| 217955_at   | BCL2-like 13 (apoptosis facilitator)                                                                     | BCL2L13                 | 23786         | -2.788516 | 0.670898 |
| 205222_at   | enoyl-Coenzyme A, hydratase/3-hydroxyacyl Coenzyme A dehydrogenase                                       | EHHADH                  | 1962          | -2.788582 | 0.670898 |
| 204512_at   | human immunodeficiency virus type I enhancer binding protein 1                                           | HIVEP1                  | 3096          | -2.789053 | 0.670898 |
| 220806_x_at | guanine nucleotide binding protein (G protein), gamma 13                                                 | GNG13                   | 51764         | -2.792734 | 0.670898 |
| 208851_s_at | Thy-1 cell surface antigen                                                                               | THY1                    | 7070          | -2.79336  | 0.670898 |
| 207050_at   | calcium channel, voltage-dependent, alpha 2/delta subunit 1                                              | CACNA2D1                | 781           | -2.805538 | 0.66705  |

Supplementary Table 5: Jurakt cells stimulated with PD-1/CD3/CD28 vs. CD3/CD28

|             |                                                                                                                       |                             |               |           |          |
|-------------|-----------------------------------------------------------------------------------------------------------------------|-----------------------------|---------------|-----------|----------|
| 216641_s_at | ladinin 1                                                                                                             | LAD1                        | 3898          | -2.807319 | 0.666139 |
| 206291_at   | neurotensin                                                                                                           | NTS                         | 4922          | -2.808148 | 0.666139 |
| 218228_s_at | tankyrase, TRF1-interacting ankyrin-related ADP-ribose polymerase 2                                                   | TNKS2                       | 80351         | -2.8123   | 0.666139 |
| 212946_at   | KIAA0564                                                                                                              | KIAA0564                    | 23078         | -2.812606 | 0.666139 |
| 222308_x_at | Transcribed locus                                                                                                     | ---                         | ---           | -2.812773 | 0.666139 |
| 219154_at   | Ras homolog gene family, member F (in filopodia)                                                                      | RHOF                        | 54509         | -2.81728  | 0.666139 |
| 211269_s_at | interleukin 2 receptor, alpha                                                                                         | IL2RA                       | 3559          | -2.818701 | 0.666139 |
| 211016_x_at | heat shock 70kDa protein 4                                                                                            | HSPA4                       | 3308          | -2.819278 | 0.666139 |
| 215756_at   | hypothetical protein LOC730227                                                                                        | LOC730227                   | 730227        | -2.821346 | 0.665777 |
| 217805_at   | interleukin enhancer binding factor 3, 90kDa                                                                          | ILF3                        | 3609          | -2.821995 | 0.665777 |
| 208952_s_at | La ribonucleoprotein domain family, member 5                                                                          | LARP5                       | 23185         | -2.822781 | 0.665777 |
| 217099_s_at | gem (nuclear organelle) associated protein 4                                                                          | GEMIN4                      | 50628         | -2.825648 | 0.664041 |
| 201064_s_at | poly(A) binding protein, cytoplasmic 4 (inducible form)                                                               | PABPC4                      | 8761          | -2.826461 | 0.664041 |
| 212720_at   | poly(A) polymerase alpha                                                                                              | PAPOLA                      | 10914         | -2.831068 | 0.660294 |
| 212247_at   | nucleoporin 205kDa                                                                                                    | NUP205                      | 23165         | -2.83174  | 0.660294 |
| 203944_x_at | butyrophilin, subfamily 2, member A1                                                                                  | BTN2A1                      | 11120         | -2.834712 | 0.659838 |
| 213363_at   | Homo sapiens, clone IMAGE:5244869, mRNA                                                                               | ---                         | ---           | -2.834993 | 0.659838 |
| 221329_at   | olfactory receptor, family 52, subfamily A, member 1                                                                  | OR52A1                      | 23538         | -2.835532 | 0.659838 |
| 207300_s_at | coagulation factor VII (serum prothrombin conversion accelerator)                                                     | F7                          | 2155          | -2.837244 | 0.659838 |
| 214359_s_at | heat shock protein 90kDa alpha (cytosolic), class B member 1                                                          | HSP90AB1                    | 3326          | -2.838452 | 0.659838 |
| 211982_x_at | exportin 6                                                                                                            | XPO6                        | 23214         | -2.838847 | 0.659838 |
| 202083_s_at | SEC14-like 1 (S. cerevisiae)                                                                                          | SEC14L1                     | 6397          | -2.839853 | 0.659838 |
| 201928_at   | plakophilin 4                                                                                                         | PKP4                        | 8502          | -2.841018 | 0.659838 |
| 211365_s_at | protocadherin alpha 2                                                                                                 | PCDHA2                      | 56146         | -2.842468 | 0.659838 |
| 206766_at   | integrin, alpha 10                                                                                                    | ITGA10                      | 8515          | -2.84248  | 0.659838 |
| 218395_at   | ARP6 actin-related protein 6 homolog (yeast)                                                                          | ACTR6                       | 64431         | -2.84267  | 0.659838 |
| 214672_at   | tubulin tyrosine ligase-like family, member 5                                                                         | TTL5                        | 23093         | -2.843454 | 0.659838 |
| 217401_at   | ---                                                                                                                   | ---                         | ---           | -2.843475 | 0.659838 |
| 219369_s_at | OTU domain, ubiquitin aldehyde binding 2                                                                              | OTUB2                       | 78990         | -2.844774 | 0.659838 |
| 206050_s_at | ribonuclease/angiogenin inhibitor 1                                                                                   | RNH1                        | 6050          | -2.845847 | 0.659838 |
| 216969_s_at | kinesin family member 22 /// kinesin-like DNA-binding protein pseudogene                                              | KIF22 /// LOC 3835 /// 7280 | ---           | -2.84965  | 0.659838 |
| 221379_at   | ---                                                                                                                   | ---                         | ---           | -2.85234  | 0.659838 |
| 220547_s_at | family with sequence similarity 35, member A                                                                          | FAM35A                      | 54537         | -2.85405  | 0.659838 |
| 212197_x_at | myosin phosphatase-Rho interacting protein                                                                            | M-RIP                       | 23164         | -2.85566  | 0.659838 |
| 216360_x_at | ribosomal RNA processing 12 homolog (S. cerevisiae)                                                                   | RRP12                       | 23223         | -2.855982 | 0.659838 |
| 201112_s_at | CSE1 chromosome segregation 1-like (yeast)                                                                            | CSE1L                       | 1434          | -2.857241 | 0.659838 |
| 211042_x_at | melanoma cell adhesion molecule                                                                                       | MCAM                        | 4162          | -2.860596 | 0.659838 |
| 212105_s_at | DEAH (Asp-Glu-Ala-His) box polypeptide 9                                                                              | DHX9                        | 1660          | -2.860912 | 0.659838 |
| 220809_at   | hypothetical protein FLJ14327                                                                                         | FLJ14327                    | 79972         | -2.862177 | 0.659838 |
| 211270_x_at | polypyrimidine tract binding protein 1                                                                                | PTBP1                       | 5725          | -2.863465 | 0.659838 |
| 202414_at   | excision repair cross-complementing rodent repair deficiency, complementation group 5 (xeroderma pigmentosum group C) | ERCC5                       | 2073          | -2.863683 | 0.659838 |
| 209921_at   | solute carrier family 7, (cationic amino acid transporter, y+ system) member 11                                       | SLC7A11                     | 23657         | -2.864739 | 0.659838 |
| 222249_at   | KIAA1651 protein                                                                                                      | ---                         | ---           | -2.866844 | 0.659838 |
| 218153_at   | cysteinyl-tRNA synthetase 2, mitochondrial (putative)                                                                 | CARS2                       | 79587         | -2.867047 | 0.659838 |
| 217632_at   | guanine nucleotide binding protein-like 3 (nucleolar)-like                                                            | GNL3L                       | 54552         | -2.867895 | 0.659838 |
| 219321_at   | membrane protein, palmitoylated 5 (MAGUK p55 subfamily member 5)                                                      | MPP5                        | 64398         | -2.868159 | 0.659838 |
| 203506_s_at | mediator complex subunit 12                                                                                           | MED12                       | 9968          | -2.868665 | 0.659838 |
| 215910_s_at | fibronectin type III domain containing 3A                                                                             | FNDC3A                      | 22862         | -2.869086 | 0.659838 |
| 222047_s_at | arsenate resistance protein 2                                                                                         | ARS2                        | 51593         | -2.87061  | 0.659838 |
| 218511_s_at | pyridoxamine 5'-phosphate oxidase                                                                                     | PNPO                        | 55163         | -2.871684 | 0.659838 |
| 215413_at   | exocyst complex component 7                                                                                           | EXOC7                       | 23265         | -2.87229  | 0.659838 |
| 202290_at   | PDGFA associated protein 1                                                                                            | PDAP1                       | 11333         | -2.872778 | 0.659838 |
| 216373_at   | transmembrane anterior posterior transformation 1                                                                     | TAPT1                       | 202018        | -2.875988 | 0.659838 |
| 211027_s_at | inhibitor of kappa light polypeptide gene enhancer in B-cells, kinase beta                                            | IKBK                        | 3551          | -2.881524 | 0.659838 |
| 200647_x_at | eukaryotic translation initiation factor 3, subunit C /// eukaryotic translation initiation factor 3, subunit C       | EIF3C /// EIF3              | 728689 /// 86 | -2.882124 | 0.659838 |
| 221276_s_at | syncoilin, intermediate filament 1                                                                                    | SYNC1                       | 81493         | -2.884527 | 0.659838 |
| 209699_x_at | aldo-keto reductase family 1, member C2 (dihydrodiol dehydrogenase 2; bile acid binding protein)                      | AKR1C2                      | 1646          | -2.884794 | 0.659838 |
| 201774_s_at | non-SMC condensin I complex, subunit D2                                                                               | NCAPD2                      | 9918          | -2.885752 | 0.659838 |
| 207622_s_at | ATP-binding cassette, sub-family F (GCN20), member 2                                                                  | ABCF2                       | 10061         | -2.88778  | 0.659838 |
| 203935_at   | activin A receptor, type I                                                                                            | ACVR1                       | 90            | -2.890088 | 0.659838 |
| 201086_x_at | SON DNA binding protein                                                                                               | SON                         | 6651          | -2.89182  | 0.659838 |
| 218838_s_at | tetratricopeptide repeat domain 31                                                                                    | TTC31                       | 64427         | -2.89251  | 0.659838 |
| 207579_at   | melanoma antigen family B, 3                                                                                          | MAGEB3                      | 4114          | -2.894599 | 0.659838 |
| 217156_at   | ---                                                                                                                   | ---                         | ---           | -2.895667 | 0.659838 |
| 204157_s_at | KIAA0999 protein                                                                                                      | KIAA0999                    | 23387         | -2.895754 | 0.659838 |
| 201680_x_at | arsenate resistance protein 2                                                                                         | ARS2                        | 51593         | -2.895824 | 0.659838 |
| 202893_at   | unc-13 homolog B (C. elegans)                                                                                         | UNC13B                      | 10497         | -2.89693  | 0.659838 |
| 202070_s_at | isocitrate dehydrogenase 3 (NAD+) alpha                                                                               | IDH3A                       | 3419          | -2.897518 | 0.659838 |
| 221817_at   | dolichyl pyrophosphate phosphatase 1                                                                                  | DOLPP1                      | 57171         | -2.899453 | 0.659838 |
| 205748_s_at | ring finger protein 126                                                                                               | RNF126                      | 55658         | -2.899626 | 0.659838 |
| 209777_s_at | solute carrier family 19 (folate transporter), member 1                                                               | SLC19A1                     | 6573          | -2.901126 | 0.659838 |
| 201563_at   | sorbitol dehydrogenase                                                                                                | SORD                        | 6652          | -2.901571 | 0.659838 |
| 214050_at   | ---                                                                                                                   | ---                         | ---           | -2.90191  | 0.659838 |
| 203550_s_at | chromosome 1 open reading frame 2                                                                                     | C1orf2                      | 10712         | -2.903663 | 0.659838 |
| 204536_s_at | ---                                                                                                                   | ---                         | ---           | -2.904602 | 0.659838 |
| 209320_at   | adenylate cyclase 3                                                                                                   | ADCY3                       | 109           | -2.904722 | 0.659838 |
| 206997_s_at | heparan sulfate 6-O-sulfotransferase 1 /// similar to Heparan-sulfate 6-O-sulfotransferase 1 (HSE)                    | HS6ST1 /// LC 728969 /// 93 | ---           | -2.905705 | 0.659838 |
| 221626_at   | zinc finger protein 506                                                                                               | ZNF506                      | 440515        | -2.906564 | 0.659838 |
| 201529_s_at | replication protein A1, 70kDa                                                                                         | RPA1                        | 6117          | -2.909241 | 0.659838 |
| 203289_s_at | chromosome 16 open reading frame 35                                                                                   | C16orf35                    | 8131          | -2.909359 | 0.659838 |
| 217136_at   | peptidylprolyl isomerase A (cyclophilin A)-like 4 /// similar to peptidylprolyl isomerase A (cyclophilin A)           | LOC653505 /// 164022 /// 65 | ---           | -2.909391 | 0.659838 |
| 202558_s_at | stress 70 protein chaperone, microsome-associated, 60kDa                                                              | STCH                        | 6782          | -2.913598 | 0.659838 |
| 203443_at   | echinoderm microtubule associated protein like 3                                                                      | EML3                        | 256364        | -2.91405  | 0.659838 |
| 216205_s_at | mitofusin 2                                                                                                           | MFN2                        | 9927          | -2.914629 | 0.659838 |
| 204072_s_at | furry homolog (Drosophila)                                                                                            | FRY                         | 10129         | -2.914833 | 0.659838 |
| 202565_s_at | supervillin                                                                                                           | SVIL                        | 6840          | -2.917728 | 0.659838 |

Supplementary Table 5: Jurakt cells stimulated with PD-1/CD3/CD28 vs. CD3/CD28

|             |                                                                                                   |                             |           |          |
|-------------|---------------------------------------------------------------------------------------------------|-----------------------------|-----------|----------|
| 217492_s_at | phosphatase and tensin homolog (mutated in multiple advanced cancers 1) /// phosphatase and       | LOC731292 /// 11191 /// 572 | -2.9189   | 0.659838 |
| 201476_s_at | ribonucleotide reductase M1 polypeptide                                                           | RRM1 6240                   | -2.9221   | 0.659838 |
| 200643_at   | high density lipoprotein binding protein (vigilin)                                                | HDLBP 3069                  | -2.922339 | 0.659838 |
| 207134_x_at | trypsin alpha/beta 1                                                                              | TPSAB1 7177                 | -2.922383 | 0.659838 |
| 214336_s_at | coatamer protein complex. subunit alpha                                                           | COPA 1314                   | -2.923415 | 0.659838 |
| 220761_s_at | TAO kinase 3                                                                                      | TAOK3 51347                 | -2.924593 | 0.659838 |
| 208034_s_at | protein Z, vitamin K-dependent plasma glycoprotein                                                | PROZ 8858                   | -2.926092 | 0.659838 |
| 217525_at   | olfactomedin-like 1                                                                               | OLFML1 283298               | -2.926247 | 0.659838 |
| 208202_s_at | PHD finger protein 15                                                                             | PHF15 23338                 | -2.926422 | 0.659838 |
| 201578_at   | podocalyxin-like                                                                                  | PODXL 5420                  | -2.928591 | 0.659838 |
| 217333_at   | keratin 18 pseudogene 44                                                                          | KRT18P44 139748             | -2.928839 | 0.659838 |
| 217825_s_at | ubiquitin-conjugating enzyme E2, J1 (UBC6 homolog, yeast)                                         | UBE2J1 51465                | -2.931948 | 0.659838 |
| 219884_at   | LIM homeobox 6                                                                                    | LHX6 26468                  | -2.934571 | 0.659838 |
| 214771_x_at | myosin phosphatase-Rho interacting protein                                                        | M-RIP 23164                 | -2.941299 | 0.659838 |
| 218306_s_at | hect (homologous to the E6-AP (UBE3A) carboxyl terminus) domain and RCC1 (CHC1)-like domain       | HERC1 8925                  | -2.941586 | 0.659838 |
| 205252_at   | zinc finger protein 174                                                                           | ZNF174 7727                 | -2.941655 | 0.659838 |
| 212618_at   | zinc finger protein 609                                                                           | ZNF609 23060                | -2.942197 | 0.659838 |
| 202636_at   | ring finger protein 103                                                                           | RNF103 7844                 | -2.942925 | 0.659838 |
| 210256_s_at | phosphatidylinositol-4-phosphate 5-kinase, type I, alpha                                          | PIP5K1A 8394                | -2.943648 | 0.659838 |
| 216232_s_at | GCN1 general control of amino-acid synthesis 1-like 1 (yeast)                                     | GCN1L1 10985                | -2.947385 | 0.659838 |
| 202107_s_at | minichromosome maintenance complex component 2                                                    | MCM2 4171                   | -2.950055 | 0.659838 |
| 219426_at   | eukaryotic translation initiation factor 2C, 3                                                    | EIF2C3 192669               | -2.951402 | 0.659838 |
| 204243_at   | rearranged L-myc fusion                                                                           | RLF 6018                    | -2.952424 | 0.659838 |
| 203690_at   | tubulin, gamma complex associated protein 3                                                       | TUBGCP3 10426               | -2.953104 | 0.659838 |
| 203580_s_at | solute carrier family 7 (cationic amino acid transporter, y+ system), member 6                    | SLC7A6 9057                 | -2.953437 | 0.659838 |
| 203372_s_at | suppressor of cytokine signaling 2                                                                | Socs2 8835                  | -2.955747 | 0.659838 |
| 222087_at   | Pvt1 oncogene homolog, MYC activator (mouse)                                                      | PVT1 5820                   | -2.955868 | 0.659838 |
| 212575_at   | chromosome 19 open reading frame 6                                                                | C19orf6 91304               | -2.955954 | 0.659838 |
| 203120_at   | tumor protein p53 binding protein, 2                                                              | TP53BP2 7159                | -2.957876 | 0.659838 |
| 207524_at   | suppression of tumorigenicity 7                                                                   | ST7 7982                    | -2.958305 | 0.659838 |
| 201384_s_at | neighbor of BRCA1 gene 1 /// similar to neighbor of BRCA1 gene 1                                  | LOC727732 /// 4077 /// 7277 | -2.958683 | 0.659838 |
| 204206_at   | MAX binding protein                                                                               | MNT 4335                    | -2.95914  | 0.659838 |
| 212110_at   | solute carrier family 39 (zinc transporter), member 14                                            | SLC39A14 23516              | -2.960955 | 0.659838 |
| 216008_at   | ariadne homolog 2 (Drosophila)                                                                    | ARIH2 10425                 | -2.962294 | 0.659838 |
| 220288_at   | myosin XVA                                                                                        | MYO15A 51168                | -2.966403 | 0.659838 |
| 203875_at   | SWI/SNF related, matrix associated, actin dependent regulator of chromatin, subfamily a, member 1 | SMARCA1 6594                | -2.966509 | 0.659838 |
| 209203_s_at | bicaudal D homolog 2 (Drosophila)                                                                 | BICD2 23299                 | -2.967285 | 0.659838 |
| 222021_x_at | succinate dehydrogenase complex, subunit A, flavoprotein pseudogene 1                             | SDHALP1 255812              | -2.968924 | 0.659838 |
| 205839_s_at | benzodiazepine receptor (peripheral) associated protein 1                                         | BZRAP1 9256                 | -2.971092 | 0.659838 |
| 220840_s_at | chromosome 1 open reading frame 112                                                               | C1orf112 55732              | -2.971318 | 0.659838 |
| 204444_at   | kinesin family member 11                                                                          | KIF11 3832                  | -2.973032 | 0.659838 |
| 221879_at   | calmodulin-like 4                                                                                 | CALML4 91860                | -2.975206 | 0.659838 |
| 216090_x_at | ---                                                                                               | ---                         | -2.978601 | 0.659838 |
| 203648_at   | TatD DNase domain containing 2                                                                    | TATDN2 9797                 | -2.982513 | 0.659838 |
| 201266_at   | thioredoxin reductase 1                                                                           | TXNRD1 7296                 | -2.982972 | 0.659838 |
| 217687_at   | adenylate cyclase 2 (brain)                                                                       | ADCY2 108                   | -2.985605 | 0.659838 |
| 215170_s_at | centrosomal protein 152kDa                                                                        | CEP152 22995                | -2.986306 | 0.659838 |
| 204240_s_at | structural maintenance of chromosomes 2                                                           | SMC2 10592                  | -2.994212 | 0.659838 |
| 209386_at   | transmembrane 4 L six family member 1                                                             | TM4SF1 4071                 | -2.994983 | 0.659838 |
| 204947_at   | E2F transcription factor 1                                                                        | E2F1 1869                   | -2.99637  | 0.659838 |
| 206854_s_at | mitogen-activated protein kinase kinase kinase 7                                                  | MAP3K7 6885                 | -3.000481 | 0.659838 |
| 209352_s_at | SIN3 homolog B, transcription regulator (yeast)                                                   | SIN3B 23309                 | -3.006793 | 0.659838 |
| 215195_at   | protein kinase C, alpha                                                                           | PRKCA 5578                  | -3.008978 | 0.659838 |
| 213059_at   | cAMP responsive element binding protein 3-like 1                                                  | CREB3L1 90993               | -3.010615 | 0.659838 |
| 203040_s_at | hydroxymethylbilane synthase                                                                      | HMBS 3145                   | -3.01265  | 0.659838 |
| 200028_s_at | StAR-related lipid transfer (START) domain containing 7                                           | STARD7 56910                | -3.014835 | 0.659838 |
| 209724_s_at | zinc finger protein 161 homolog (mouse)                                                           | ZFP161 7541                 | -3.019622 | 0.659838 |
| 220276_at   | RERG/RAS-like                                                                                     | RERGL 79785                 | -3.02006  | 0.659838 |
| 211375_s_at | interleukin enhancer binding factor 3, 90kDa                                                      | ILF3 3609                   | -3.022281 | 0.659838 |
| 201598_s_at | inositol polyphosphate phosphatase-like 1                                                         | INPPL1 3636                 | -3.022463 | 0.659838 |
| 210061_at   | zinc finger protein 589                                                                           | ZNF589 51385                | -3.027497 | 0.659838 |
| 212159_x_at | adaptor-related protein complex 2, alpha 2 subunit                                                | AP2A2 161                   | -3.031842 | 0.659838 |
| 203438_at   | stanniocalcin 2                                                                                   | STC2 8614                   | -3.032651 | 0.659838 |
| 220852_at   | PRO1768 protein                                                                                   | PRO1768 29018               | -3.037981 | 0.659838 |
| 208231_at   | neuregulin 1                                                                                      | NRG1 3084                   | -3.040949 | 0.659838 |
| 212381_at   | ubiquitin specific peptidase 24                                                                   | USP24 23358                 | -3.043775 | 0.659838 |
| 218269_at   | ribonuclease III, nuclear                                                                         | RNASEN 29102                | -3.044677 | 0.659838 |
| 207614_s_at | culin 1                                                                                           | CUL1 8454                   | -3.049613 | 0.659838 |
| 201800_s_at | oxysterol binding protein                                                                         | OSBP 5007                   | -3.049985 | 0.659838 |
| 212992_at   | AHNAK nucleoprotein 2                                                                             | AHNAK2 113146               | -3.05414  | 0.659838 |
| 208258_s_at | growth arrest-specific 2 like 1                                                                   | GAS2L1 10634                | -3.057215 | 0.659838 |
| 211561_x_at | mitogen-activated protein kinase 14                                                               | MAPK14 1432                 | -3.058794 | 0.659838 |
| 201622_at   | staphylococcal nuclease and tudor domain containing 1                                             | SND1 27044                  | -3.064297 | 0.659838 |
| 220363_s_at | engulfment and cell motility 2                                                                    | ELMO2 63916                 | -3.065556 | 0.659838 |
| 221972_s_at | stromal cell derived factor 4                                                                     | SDF4 51150                  | -3.069527 | 0.659838 |
| 209599_s_at | prune homolog (Drosophila)                                                                        | PRUNE 58497                 | -3.06964  | 0.659838 |
| 201729_s_at | KIAA0100                                                                                          | KIAA0100 9703               | -3.073301 | 0.659838 |
| 203601_s_at | zinc finger and BTB domain containing 17                                                          | ZBTB17 7709                 | -3.075183 | 0.659838 |
| 204152_s_at | MFNG O-fucosylpeptide 3-beta-N-acetylglucosaminyltransferase                                      | MFNG 4242                   | -3.08229  | 0.659838 |
| 204360_s_at | N-acetylglucosaminidase, alpha- (Sanfilippo disease IIIB)                                         | NAGLU 4669                  | -3.093124 | 0.659838 |
| 202132_at   | WW domain containing transcription regulator 1                                                    | WWTR1 25937                 | -3.09341  | 0.659838 |
| 200990_at   | tripartite motif-containing 28                                                                    | TRIM28 10155                | -3.100609 | 0.659838 |
| 202413_s_at | ubiquitin specific peptidase 1                                                                    | USP1 7398                   | -3.103641 | 0.659838 |
| 212815_at   | activating signal cointegrator 1 complex subunit 3                                                | ASCC3 10973                 | -3.104893 | 0.659838 |
| 217403_s_at | zinc finger protein 227                                                                           | ZNF227 7770                 | -3.107458 | 0.659838 |
| 200828_s_at | zinc finger protein 207                                                                           | ZNF207 7756                 | -3.111647 | 0.659838 |

Supplementary Table 5: Jurakt cells stimulated with PD-1/CD3/CD28 vs. CD3/CD28

|             |                                                                                               |                             |             |           |          |
|-------------|-----------------------------------------------------------------------------------------------|-----------------------------|-------------|-----------|----------|
| 34764_at    | leucyl-tRNA synthetase 2, mitochondrial                                                       | LARS2                       | 23395       | -3.11324  | 0.659838 |
| 208431_s_at | tubby homolog (mouse)                                                                         | TUB                         | 7275        | -3.115667 | 0.659838 |
| 211870_s_at | protocadherin alpha 3                                                                         | PCDHA3                      | 56145       | -3.116323 | 0.659838 |
| 213672_at   | methionyl-tRNA synthetase                                                                     | MARS                        | 4141        | -3.117677 | 0.659838 |
| 209975_at   | cytochrome P450, family 2, subfamily E, polypeptide 1                                         | CYP2E1                      | 1571        | -3.119674 | 0.659838 |
| 221215_s_at | receptor-interacting serine-threonine kinase 4                                                | RIPK4                       | 54101       | -3.122246 | 0.659838 |
| 218390_s_at | chromosome 10 open reading frame 84                                                           | C10orf84                    | 63877       | -3.124169 | 0.659838 |
| 218020_s_at | zinc finger, AN1-type domain 3                                                                | ZFAND3                      | 60685       | -3.12464  | 0.659838 |
| 222014_x_at | mitochondrial translation optimization 1 homolog (S. cerevisiae)                              | MTO1                        | 25821       | -3.125901 | 0.659838 |
| 215995_x_at | CDNA FLJ12226 fis. clone MAMMA1001143                                                         | ---                         | ---         | -3.126418 | 0.659838 |
| 210018_x_at | mucosa associated lymphoid tissue lymphoma translocation gene 1                               | MALT1                       | 10892       | -3.128328 | 0.659838 |
| 212932_at   | RAB3 GTPase activating protein subunit 1 (catalytic)                                          | RAB3GAP1                    | 22930       | -3.128875 | 0.659838 |
| 212263_at   | quaking homolog, KH domain RNA binding (mouse)                                                | QKI                         | 9444        | -3.128914 | 0.659838 |
| 211615_s_at | leucine-rich PPR-motif containing                                                             | LRPPRC                      | 10128       | -3.130975 | 0.659838 |
| 219484_at   | host cell factor C2                                                                           | HCFC2                       | 29915       | -3.132682 | 0.659838 |
| 206352_s_at | peroxisome biogenesis factor 10                                                               | PEX10                       | 5192        | -3.135224 | 0.659838 |
| 208955_at   | deoxyuridine triphosphatase                                                                   | DUT                         | 1854        | -3.14338  | 0.659838 |
| 207788_s_at | sorbin and SH3 domain containing 3                                                            | SORBS3                      | 10174       | -3.147085 | 0.659838 |
| 212370_x_at | family with sequence similarity 21, member B /// family with sequence similarity 21, member A | FAM21A /// Fa 387680 /// 55 | ---         | -3.147427 | 0.659838 |
| 216767_at   | CDNA: FLJ21710 fis. clone COL10087                                                            | ---                         | ---         | -3.147823 | 0.659838 |
| 203422_at   | polymerase (DNA directed), delta 1, catalytic subunit 125kDa                                  | POLD1                       | 5424        | -3.151891 | 0.659838 |
| 220745_at   | interleukin 19                                                                                | IL19                        | 29949       | -3.152826 | 0.659838 |
| 203099_s_at | chromodomain protein, Y-like                                                                  | CDYL                        | 9425        | -3.152886 | 0.659838 |
| 202968_s_at | dual-specificity tyrosine-(Y)-phosphorylation regulated kinase 2                              | DYRK2                       | 8445        | -3.153709 | 0.659838 |
| 202364_at   | MAX interactor 1                                                                              | MXI1                        | 4601        | -3.157846 | 0.659838 |
| 202049_s_at | zinc finger, MYM-type 4                                                                       | ZMYM4                       | 9202        | -3.177339 | 0.659838 |
| 218604_at   | LEM domain containing 3                                                                       | LEMD3                       | 23592       | -3.181182 | 0.659838 |
| 207559_s_at | zinc finger, MYM-type 3                                                                       | ZMYM3                       | 9203        | -3.18285  | 0.659838 |
| 201461_s_at | mitogen-activated protein kinase-activated protein kinase 2                                   | MAPKAPK2                    | 9261        | -3.190135 | 0.659838 |
| 220130_x_at | leukotriene B4 receptor 2                                                                     | LTB4R2                      | 56413       | -3.191735 | 0.659838 |
| 219515_at   | PR domain containing 10                                                                       | PRDM10                      | 56980       | -3.192417 | 0.659838 |
| 220349_s_at | endo-beta-N-acetylglucosaminidase                                                             | FLJ21865                    | 64772       | -3.192798 | 0.659838 |
| 217601_at   | nucleoporin 188kDa                                                                            | NUP188                      | 23511       | -3.197626 | 0.659838 |
| 219490_s_at | DNA cross-link repair 1B (PSO2 homolog, S. cerevisiae)                                        | DCLRE1B                     | 64858       | -3.19834  | 0.659838 |
| 212439_at   | inositol hexaphosphate kinase 1                                                               | IHPK1                       | 9807        | -3.198576 | 0.659838 |
| 210983_s_at | minichromosome maintenance complex component 7                                                | MCM7                        | 4176        | -3.200229 | 0.659838 |
| 212388_at   | ubiquitin specific peptidase 24                                                               | USP24                       | 23358       | -3.209458 | 0.659838 |
| 203809_s_at | v-akt murine thymoma viral oncogene homolog 2                                                 | AKT2                        | 208         | -3.209949 | 0.659838 |
| 201159_s_at | N-myristoyltransferase 1                                                                      | NMT1                        | 4836        | -3.210127 | 0.659838 |
| 212084_at   | testis expressed 261                                                                          | TEX261                      | 113419      | -3.211376 | 0.659838 |
| 206498_at   | oculocutaneous albinism II (pink-eye dilution homolog, mouse)                                 | OCA2                        | 4948        | -3.211379 | 0.659838 |
| 210455_at   | chromosome 10 open reading frame 28                                                           | C10orf28                    | 27291       | -3.212398 | 0.659838 |
| 38158_at    | extra spindle pole bodies homolog 1 (S. cerevisiae)                                           | ESPL1                       | 9700        | -3.214741 | 0.659838 |
| 213112_s_at | sequestosome 1                                                                                | SQSTM1                      | 8878        | -3.215406 | 0.659838 |
| 203157_s_at | glutaminase                                                                                   | GLS                         | 2744        | -3.218287 | 0.659838 |
| 200722_s_at | cell cycle associated protein 1                                                               | CAPRIN1                     | 4076        | -3.221415 | 0.659838 |
| 212196_at   | Interleukin 6 signal transducer (gp130, oncostatin M receptor)                                | IL6ST                       | 3572        | -3.222908 | 0.659838 |
| 215194_at   | protein kinase C, alpha                                                                       | PRKCA                       | 5578        | -3.233247 | 0.659838 |
| 209997_x_at | pericentriolar material 1                                                                     | PCM1                        | 5108        | -3.236244 | 0.659838 |
| 222039_at   | hypothetical protein LOC146909                                                                | LOC146909                   | 146909      | -3.240897 | 0.659838 |
| 218016_s_at | polymerase (RNA) III (DNA directed) polypeptide E (80kD)                                      | POLR3E                      | 55718       | -3.249579 | 0.659838 |
| 220768_s_at | casein kinase 1, gamma 3                                                                      | CSNK1G3                     | 1456        | -3.250021 | 0.659838 |
| 214582_at   | phosphodiesterase 3B, cGMP-inhibited                                                          | PDE3B                       | 5140        | -3.251366 | 0.659838 |
| 217735_s_at | eukaryotic translation initiation factor 2-alpha kinase 1                                     | EIF2AK1                     | 27102       | -3.253415 | 0.659838 |
| 210787_s_at | calcium/calmodulin-dependent protein kinase 2, beta                                           | CAMKK2                      | 10645       | -3.254698 | 0.659838 |
| 215960_at   | solute carrier family 5 (low affinity glucose cotransporter), member 4                        | SLC5A4                      | 6527        | -3.255202 | 0.659838 |
| 216599_x_at | solute carrier family 22 (organic anion transporter), member 6                                | SLC22A6                     | 9356        | -3.257306 | 0.659838 |
| 206445_s_at | protein arginine methyltransferase 1                                                          | PRMT1                       | 3276        | -3.259405 | 0.659838 |
| 204744_s_at | isoleucyl-tRNA synthetase                                                                     | IARS                        | 3376        | -3.260419 | 0.659838 |
| 217895_at   | Pentatricopeptide repeat domain 3                                                             | PTCD3                       | 55037       | -3.271357 | 0.659838 |
| 218343_s_at | general transcription factor IIIC, polypeptide 3, 102kDa                                      | GTF3C3                      | 9330        | -3.2729   | 0.659838 |
| 211724_x_at | hypothetical protein FLJ20323                                                                 | FLJ20323                    | 54468       | -3.278673 | 0.659838 |
| 44120_at    | jaarF domain containing kinase 2                                                              | ADCK2                       | 90956       | -3.286476 | 0.659838 |
| 210544_s_at | aldehyde dehydrogenase 3 family, member A2                                                    | ALDH3A2                     | 224         | -3.288576 | 0.659838 |
| 205700_at   | hydroxysteroid (17-beta) dehydrogenase 6 homolog (mouse)                                      | HSD17B6                     | 8630        | -3.289485 | 0.659838 |
| 202477_s_at | tubulin, gamma complex associated protein 2                                                   | TUBGCP2                     | 10844       | -3.290951 | 0.659838 |
| 210692_s_at | solute carrier family 43, member 3                                                            | SLC43A3                     | 29015       | -3.293499 | 0.659838 |
| 208979_at   | nuclear receptor coactivator 6                                                                | NCOA6                       | 23054       | -3.298875 | 0.659838 |
| 213807_x_at | met proto-oncogene (hepatocyte growth factor receptor)                                        | MET                         | 4233        | -3.299836 | 0.659838 |
| 202653_s_at | membrane-associated ring finger (C3HC4) 7                                                     | ---                         | 7-Mar 64844 | -3.303499 | 0.659838 |
| 213929_at   | CDNA clone IMAGE:4733238                                                                      | ---                         | ---         | -3.30791  | 0.659838 |
| 218479_s_at | exportin 4                                                                                    | XPO4                        | 64328       | -3.308857 | 0.659838 |
| 202095_s_at | baculoviral IAP repeat-containing 5 (survivin)                                                | BIRC5                       | 332         | -3.310453 | 0.659838 |
| 203890_s_at | death-associated protein kinase 3                                                             | DAPK3                       | 1613        | -3.322887 | 0.659838 |
| 217449_at   | MRNA; cDNA DKFZp434D1516 (from clone DKFZp434D1516)                                           | ---                         | ---         | -3.327842 | 0.659838 |
| 205544_s_at | complement component (3d/Epstein Barr virus) receptor 2                                       | CR2                         | 1380        | -3.33664  | 0.659838 |
| 219918_s_at | asp (abnormal spindle) homolog, microcephaly associated (Drosophila)                          | ASPM                        | 259266      | -3.339053 | 0.659838 |
| 202094_at   | baculoviral IAP repeat-containing 5 (survivin)                                                | BIRC5                       | 332         | -3.33953  | 0.659838 |
| 207890_s_at | matrix metalloproteinase 25                                                                   | MMP25                       | 64386       | -3.341023 | 0.659838 |
| 204651_at   | nuclear respiratory factor 1                                                                  | NRF1                        | 4899        | -3.34182  | 0.659838 |
| 201977_s_at | KIAA0141                                                                                      | KIAA0141                    | 9812        | -3.341932 | 0.659838 |
| 210206_s_at | DEAD/H (Asp-Glu-Ala-Asp/His) box polypeptide 11 (CHL1-like helicase homolog, S. cerevisiae)   | DDX11                       | 1663        | -3.345102 | 0.659838 |
| 215509_s_at | BUB1 budding uninhibited by benzimidazoles 1 homolog (yeast)                                  | BUB1                        | 699         | -3.346864 | 0.659838 |
| 220236_at   | pyruvate dehydrogenase phosphatase regulatory subunit                                         | PDPR                        | 55066       | -3.348782 | 0.659838 |
| 212689_s_at | jumonji domain containing 1A                                                                  | JMJD1A                      | 55818       | -3.349623 | 0.659838 |
| 215897_at   | mediator complex subunit 25                                                                   | MED25                       | 81857       | -3.350978 | 0.659838 |

Supplementary Table 5: Jurakt cells stimulated with PD-1/CD3/CD28 vs. CD3/CD28

|             |                                                                                                           |                              |               |           |          |
|-------------|-----------------------------------------------------------------------------------------------------------|------------------------------|---------------|-----------|----------|
| 203118_at   | :proprotein convertase subtilisin/kexin type 7                                                            | :PCSK7                       | 9159          | -3.351132 | 0.659838 |
| 217445_s_at | :phosphoribosylglycinamide formyltransferase, phosphoribosylglycinamide synthetase, phosphorib            | :GART                        | 2618          | -3.353902 | 0.659838 |
| 203092_at   | :translocase of inner mitochondrial membrane 44 homolog (yeast)                                           | :TIMM44                      | 10469         | -3.355713 | 0.659838 |
| 213209_at   | :TAF6-like RNA polymerase II, p300/CBP-associated factor (PCAF)-associated factor, 65kDa                  | :TAF6L                       | 10629         | -3.356676 | 0.659838 |
| 218575_at   | :anaphase promoting complex subunit 1                                                                     | :ANAPC1                      | 64682         | -3.358109 | 0.659838 |
| 213223_at   | :ribosomal protein L28                                                                                    | :RPL28                       | 6158          | -3.360826 | 0.659838 |
| 202226_s_at | :v-crk sarcoma virus CT10 oncogene homolog (avian)                                                        | :CRK                         | 1398          | -3.365529 | 0.659838 |
| 207629_s_at | :rho/rac guanine nucleotide exchange factor (GEF) 2                                                       | :ARHGEF2                     | 9181          | -3.366402 | 0.659838 |
| 212669_at   | :calcium/calmodulin-dependent protein kinase (CaM kinase) II gamma                                        | :CAMK2G                      | 818           | -3.371637 | 0.659838 |
| 203194_s_at | :nucleoporin 98kDa                                                                                        | :NUP98                       | 4928          | -3.382784 | 0.659838 |
| 219566_at   | :pleckstrin homology domain containing, family F (with FYVE domain) member 1                              | :PLEKHF1                     | 79156         | -3.383601 | 0.659838 |
| 211109_at   | :Janus kinase 3 (a protein tyrosine kinase, leukocyte)                                                    | :JAK3                        | 3718          | -3.387591 | 0.659838 |
| 220212_s_at | :thyroid adenoma associated                                                                               | :THADA                       | 63892         | -3.387613 | 0.659838 |
| 206425_s_at | :transient receptor potential cation channel, subfamily C, member 3                                       | :TRPC3                       | 7222          | -3.393535 | 0.659838 |
| 209453_at   | :solute carrier family 9 (sodium/hydrogen exchanger), member 1 (antiporter, Na+/H+, amiloride             | :SLC9A1                      | 6548          | -3.398832 | 0.659838 |
| 210053_at   | :TAF5 RNA polymerase II, TATA box binding protein (TBP)-associated factor, 100kDa                         | :TAF5                        | 6877          | -3.414184 | 0.659838 |
| 219098_at   | :MYB binding protein (P160) 1a                                                                            | :MYBBP1A                     | 10514         | -3.416388 | 0.659838 |
| 210457_x_at | :high mobility group AT-hook 1                                                                            | :HMGAI1                      | 3159          | -3.42584  | 0.659838 |
| 214820_at   | :bromodomain and WD repeat domain containing 1                                                            | :BRWD1                       | 54014         | -3.426963 | 0.659838 |
| 204736_s_at | :chondroitin sulfate proteoglycan 4                                                                       | :CSPG4                       | 1464          | -3.438347 | 0.659838 |
| 205667_at   | :Werner syndrome                                                                                          | :WRN                         | 7486          | -3.439393 | 0.659838 |
| 217750_s_at | :ubiquitin-conjugating enzyme E2Z                                                                         | :UBE2Z                       | 65264         | -3.446538 | 0.659838 |
| 208021_s_at | :replication factor C (activator 1) 1, 145kDa                                                             | :RFC1                        | 5981          | -3.452363 | 0.659838 |
| 211955_at   | :RAN binding protein 5                                                                                    | :RANBP5                      | 3843          | -3.457148 | 0.659838 |
| 210949_s_at | :eukaryotic translation initiation factor 3, subunit C /// eukaryotic translation initiation factor 3, su | :EIF3C /// EIF3              | 728689 /// 86 | -3.457437 | 0.659838 |
| 213118_at   | :UHRF1 (ICBP90) binding protein 1-like                                                                    | :UHRF1BP1L                   | 23074         | -3.457614 | 0.659838 |
| 203947_at   | :cleavage stimulation factor, 3' pre-RNA, subunit 3, 77kDa                                                | :CSTF3                       | 1479          | -3.459899 | 0.659838 |
| 200685_at   | :splicing factor, arginine/serine-rich 11                                                                 | :SFRS11                      | 9295          | -3.46931  | 0.659838 |
| 200656_s_at | :procollagen-proline, 2-oxoglutarate 4-dioxygenase (proline 4-hydroxylase), beta polypeptide              | :P4HB                        | 5034          | -3.469481 | 0.659838 |
| 212315_s_at | :nucleoporin 210kDa                                                                                       | :NUP210                      | 23225         | -3.473049 | 0.659838 |
| 37860_at    | :zinc finger protein 337                                                                                  | :ZNF337                      | 26152         | -3.473772 | 0.659838 |
| 47083_at    | :chromosome 7 open reading frame 26                                                                       | :C7orf26                     | 79034         | -3.481351 | 0.659838 |
| 220275_at   | :CUB and zona pellucida-like domains 1                                                                    | :CUZD1                       | 50624         | -3.486819 | 0.659838 |
| 204190_at   | :ubiquitin specific peptidase like 1                                                                      | :USPL1                       | 10208         | -3.493441 | 0.659838 |
| 203395_s_at | :hairy and enhancer of split 1, (Drosophila)                                                              | :HES1                        | 3280          | -3.503021 | 0.659838 |
| 202458_at   | :protease, serine, 23                                                                                     | :PRSS23                      | 11098         | -3.513778 | 0.659838 |
| 203630_s_at | :component of oligomeric golgi complex 5                                                                  | :COG5                        | 10466         | -3.515034 | 0.659838 |
| 207895_at   | :N-acetylated alpha-linked acidic dipeptidase-like 1                                                      | :NAALADL1                    | 10004         | -3.51824  | 0.659838 |
| 213302_at   | :phosphoribosylformylglycinamide synthase (FGAR amidotransferase)                                         | :PFAS                        | 5198          | -3.520731 | 0.659838 |
| 205726_at   | :diaphanous homolog 2 (Drosophila)                                                                        | :DIAPH2                      | 1730          | -3.533306 | 0.659838 |
| 201391_at   | :TNF receptor-associated protein 1                                                                        | :TRAP1                       | 10131         | -3.535212 | 0.659838 |
| 204016_at   | :leucyl-tRNA synthetase 2, mitochondrial                                                                  | :LARS2                       | 23395         | -3.538666 | 0.659838 |
| 218755_at   | :kinesin family member 20A                                                                                | :KIF20A                      | 10112         | -3.540792 | 0.659838 |
| 208127_s_at | :suppressor of cytokine signaling 5                                                                       | :SOCS5                       | 9655          | -3.543413 | 0.659838 |
| 216397_s_at | :block of proliferation 1 /// similar to block of proliferation 1                                         | :BOP1 /// LOC: 23246 /// 727 | 3556269       | -3.556269 | 0.659838 |
| 215357_s_at | :polymerase (DNA-directed), delta interacting protein 3                                                   | :POLDIP3                     | 84271         | -3.558791 | 0.659838 |
| 212756_s_at | :ubiquitin protein ligase E3 component n-recogin 2                                                        | :UBR2                        | 23304         | -3.575786 | 0.659838 |
| 210505_at   | :alcohol dehydrogenase 7 (class IV), mu or sigma polypeptide                                              | :ADH7                        | 131           | -3.58159  | 0.659838 |
| 219702_at   | :placenta-specific 1                                                                                      | :PLAC1                       | 10761         | -3.581873 | 0.659838 |
| 204835_at   | :polymerase (DNA directed), alpha 1                                                                       | :POLA1                       | 5422          | -3.581904 | 0.659838 |
| 200903_s_at | :S-adenosylhomocysteine hydrolase                                                                         | :AHCY                        | 191           | -3.585197 | 0.659838 |
| 212471_at   | :KIAA0241                                                                                                 | :KIAA0241                    | 23080         | -3.588245 | 0.659838 |
| 203106_s_at | :vacuolar protein sorting 41 homolog (S. cerevisiae)                                                      | :VPS41                       | 27072         | -3.596842 | 0.659838 |
| 216682_s_at | :family with sequence similarity 48, member A                                                             | :FAM48A                      | 55578         | -3.610767 | 0.659838 |
| 221965_at   | :M-phase phosphoprotein 9                                                                                 | :MPHOSPH9                    | 10198         | -3.619428 | 0.659838 |
| 213756_s_at | :heat shock transcription factor 1                                                                        | :HSF1                        | 3297          | -3.619831 | 0.659838 |
| 212016_s_at | :polypyrimidine tract binding protein 1                                                                   | :PTBP1                       | 5725          | -3.622621 | 0.659838 |
| 201918_at   | :solute carrier family 25, member 36                                                                      | :SLC25A36                    | 55186         | -3.625142 | 0.659838 |
| 212125_at   | :Ran GTPase activating protein 1                                                                          | :RANGAP1                     | 5905          | -3.63484  | 0.659838 |
| 203115_at   | :ferrochelatase (protoporphyrin)                                                                          | :FECH                        | 2235          | -3.636278 | 0.659838 |
| 220773_s_at | :gephyrin                                                                                                 | :GPHN                        | 10243         | -3.641602 | 0.659838 |
| 212789_at   | :non-SMC condensin II complex, subunit D3                                                                 | :NCAPD3                      | 23310         | -3.652501 | 0.659838 |
| 221147_x_at | :WW domain containing oxidoreductase                                                                      | :WWOX                        | 51741         | -3.661956 | 0.659838 |
| 205450_at   | :phosphorylase kinase, alpha 1 (muscle)                                                                   | :PHKA1                       | 5255          | -3.678124 | 0.659838 |
| 216021_s_at | :glycine receptor, alpha 3                                                                                | :GLRA3                       | 8001          | -3.687395 | 0.659838 |
| 202367_at   | :cut-like homeobox 1                                                                                      | :CUX1                        | 1523          | -3.692489 | 0.659838 |
| 212896_at   | :superkiller viralicidal activity 2-like 2 (S. cerevisiae)                                                | :SKIV2L2                     | 23517         | -3.694827 | 0.659838 |
| 206923_at   | :protein kinase C, alpha                                                                                  | :PRKCA                       | 5578          | -3.695092 | 0.659838 |
| 202476_s_at | :tubulin, gamma complex associated protein 2                                                              | :TUBGCP2                     | 10844         | -3.696805 | 0.659838 |
| 205884_at   | :integrin, alpha 4 (antigen CD49D, alpha 4 subunit of VLA-4 receptor)                                     | :ITGA4                       | 3676          | -3.704958 | 0.659838 |
| 212048_s_at | :tyrosyl-tRNA synthetase                                                                                  | :YARS                        | 8565          | -3.708899 | 0.659838 |
| 216736_at   | :transmembrane 6 superfamily member 2                                                                     | :TM6SF2                      | 53345         | -3.714685 | 0.659838 |
| 212238_at   | :additional sex combs like 1 (Drosophila)                                                                 | :ASXL1                       | 171023        | -3.730621 | 0.659838 |
| 216757_at   | :CDNA: FLJ21342 fis. clone COL02673                                                                       | ---                          | ---           | -3.734329 | 0.659838 |
| 213222_at   | :phospholipase C, beta 1 (phosphoinositide-specific)                                                      | :PLCB1                       | 23236         | -3.736999 | 0.659838 |
| 203783_x_at | :polymerase (RNA) mitochondrial (DNA directed)                                                            | :POLRMT                      | 5442          | -3.737653 | 0.659838 |
| 214158_s_at | :PR domain containing 10                                                                                  | :PRDM10                      | 56980         | -3.741032 | 0.659838 |
| 203195_s_at | :nucleoporin 98kDa                                                                                        | :NUP98                       | 4928          | -3.768153 | 0.659838 |
| 209408_at   | :kinesin family member 2C                                                                                 | :KIF2C                       | 11004         | -3.770192 | 0.659838 |
| 205581_s_at | :nitric oxide synthase 3 (endothelial cell)                                                               | :NOS3                        | 4846          | -3.789026 | 0.659838 |
| 216199_s_at | :mitogen-activated protein kinase kinase 4                                                                | :MAP3K4                      | 4216          | -3.789942 | 0.659838 |
| 211550_at   | :epidermal growth factor receptor (erythroblastic leukemia viral (v-erb-b) oncogene homolog, avia         | :EGFR                        | 1956          | -3.792789 | 0.659838 |
| 216305_s_at | :chromosome 2 open reading frame 3                                                                        | :C2orf3                      | 6936          | -3.796848 | 0.659838 |
| 219320_at   | :myosin XIX                                                                                               | :MYO19                       | 80179         | -3.810062 | 0.659838 |
| 210114_at   | :inversin                                                                                                 | :INVS                        | 27130         | -3.826297 | 0.659838 |
| 203100_s_at | :chromodomain protein, Y-like                                                                             | :CDYL                        | 9425          | -3.82816  | 0.659838 |

Supplementary Table 5: Jurakt cells stimulated with PD-1/CD3/CD28 vs. CD3/CD28

|             |                                                                                |                       |        |           |          |
|-------------|--------------------------------------------------------------------------------|-----------------------|--------|-----------|----------|
| 209229_s_at | SAPS domain family, member 1                                                   | SAPS1                 | 22870  | -3.829086 | 0.659838 |
| 208597_at   | ciliary neurotrophic factor                                                    | CNTF                  | 1270   | -3.837091 | 0.659838 |
| 203235_at   | thimet oligopeptidase 1                                                        | THOP1                 | 7064   | -3.845062 | 0.659838 |
| 209642_at   | BUB1 budding uninhibited by benzimidazoles 1 homolog (yeast)                   | BUB1                  | 699    | -3.847238 | 0.659838 |
| 219017_at   | ethanolamine kinase 1                                                          | ETNK1                 | 55500  | -3.859679 | 0.659838 |
| 36830_at    | mitochondrial intermediate peptidase                                           | MIPEP                 | 4285   | -3.861645 | 0.659838 |
| 208699_x_at | transketolase (Wernicke-Korsakoff syndrome)                                    | TKT                   | 7086   | -3.862596 | 0.659838 |
| 212272_at   | lipin 1                                                                        | LPIN1                 | 23175  | -3.872718 | 0.659838 |
| 219307_at   | prenyl (decaprenyl) diphosphate synthase, subunit 2                            | PDSS2                 | 57107  | -3.872858 | 0.659838 |
| 203462_x_at | eukaryotic translation initiation factor 3, subunit B                          | EIF3B                 | 8662   | -3.886074 | 0.659838 |
| 210412_at   | glutamate receptor, ionotropic, N-methyl D-aspartate 2B                        | GRIN2B                | 2904   | -3.920012 | 0.659838 |
| 210625_s_at | A kinase (PRKA) anchor protein 1                                               | AKAP1                 | 8165   | -3.936975 | 0.659838 |
| 220988_s_at | C1q and tumor necrosis factor related protein 3                                | C1QTNF3               | 114899 | -3.954415 | 0.659838 |
| 210555_s_at | nuclear factor of activated T-cells, cytoplasmic, calcineurin-dependent 3      | NFATC3                | 4775   | -3.965315 | 0.659838 |
| 212164_at   | transmembrane protein 183A                                                     | TMEM183A              | 92703  | -3.989355 | 0.659838 |
| 203835_s_at | leucine rich repeat containing 32                                              | LRRC32                | 2615   | -4.021946 | 0.659838 |
| 203373_at   | suppressor of cytokine signaling 2                                             | SOCS2                 | 8835   | -4.02917  | 0.659838 |
| 47571_at    | zinc finger protein 236                                                        | ZNF236                | 7776   | -4.035174 | 0.659838 |
| 202302_s_at | arginine/serine-rich coiled-coil 2                                             | RSRC2                 | 65117  | -4.054584 | 0.659838 |
| 211791_s_at | potassium voltage-gated channel, shaker-related subfamily, beta member 2       | KCNAB2                | 8514   | -4.086634 | 0.659838 |
| 203578_s_at | solute carrier family 7 (cationic amino acid transporter, y+ system), member 6 | SLC7A6                | 9057   | -4.092662 | 0.659838 |
| 215747_s_at | regulator of chromosome condensation 1 /// SNHG3-RCC1                          | RCC1 /// SNH_1104 /// | 7518   | -4.093268 | 0.659838 |
| 219608_s_at | F-box protein 38                                                               | FBXO38                | 81545  | -4.1201   | 0.659838 |
| 215581_s_at | minichromosome maintenance complex component 3 associated protein              | MCM3AP                | 8888   | -4.169899 | 0.659838 |
| 202099_s_at | DiGeorge syndrome critical region gene 2                                       | DGCR2                 | 9993   | -4.170982 | 0.659838 |
| 212653_s_at | EH domain binding protein 1                                                    | EHBP1                 | 23301  | -4.187376 | 0.659838 |
| 202496_at   | enhancer of mRNA decapping 4                                                   | EDC4                  | 23644  | -4.193291 | 0.659838 |
| 201167_x_at | Rho GDP dissociation inhibitor (GDI) alpha                                     | ARHGDIA               | 396    | -4.196988 | 0.659838 |
| 201479_at   | dyskeratosis congenita 1, dyskerin                                             | DKC1                  | 1736   | -4.224747 | 0.659838 |
| 204275_at   | small optic lobes homolog (Drosophila)                                         | SOLH                  | 6650   | -4.232288 | 0.659838 |
| 211337_s_at | tubulin, gamma complex associated protein 4                                    | TUBGCP4               | 27229  | -4.244358 | 0.659838 |
| 212431_at   | KIAA0194 protein                                                               | KIAA0194              | 22993  | -4.319757 | 0.659838 |
| 216217_at   | phospholipase C-like 2                                                         | PLCL2                 | 23228  | -4.353492 | 0.659838 |
| 218927_s_at | carbohydrate (chondroitin 4) sulfotransferase 12                               | CHST12                | 55501  | -4.409404 | 0.659838 |
| 201842_s_at | EGF-containing fibulin-like extracellular matrix protein 1                     | EFEMP1                | 2202   | -4.47356  | 0.658014 |
| 205895_s_at | nucleolar and coiled-body phosphoprotein 1                                     | NOLC1                 | 9221   | -4.523706 | 0.643373 |
| 222113_s_at | epidermal growth factor receptor pathway substrate 15-like 1                   | EPS15L1               | 58513  | -4.550499 | 0.640184 |
| 202179_at   | bleomycin hydrolase                                                            | BLMH                  | 642    | -4.569564 | 0.634111 |
| 213077_at   | YTH domain containing 2                                                        | YTHDC2                | 64848  | -4.594537 | 0.623444 |
| 212893_at   | zinc finger, ZZ-type containing 3                                              | ZZZ3                  | 26009  | -4.634696 | 0.623444 |
| 201796_s_at | valyl-tRNA synthetase                                                          | VARS                  | 7407   | -4.650356 | 0.623444 |
| 203159_at   | glutaminase                                                                    | GLS                   | 2744   | -4.748201 | 0.585101 |
| 218382_s_at | U2 small nuclear RNA auxiliary factor 2                                        | U2AF2                 | 11338  | -4.774282 | 0.576315 |
| 205095_s_at | ATPase, H+ transporting, lysosomal V0 subunit a1                               | ATP6V0A1              | 535    | -4.921941 | 0.487407 |
| 205461_at   | RAB35, member RAS oncogene family                                              | RAB35                 | 11021  | -4.973428 | 0.482434 |
| 201478_s_at | dyskeratosis congenita 1, dyskerin                                             | DKC1                  | 1736   | -5.246881 | 0.392181 |
| 220950_s_at | KIAA1310                                                                       | KIAA1310              | 55683  | -5.424994 | 0.368172 |
| 203644_s_at | MON1 homolog B (yeast)                                                         | MON1B                 | 22879  | -5.673282 | 0.368172 |
| 213578_at   | bone morphogenetic protein receptor, type IA                                   | BMPRIA                | 657    | -6.010642 | 0.295814 |
| 201638_s_at | cleavage and polyadenylation specific factor 1, 160kDa                         | CPSF1                 | 29894  | -7.908362 | 0.105387 |

Supplementary Table 6: Genes common to Progressor and PD-1 signatures

| probeset_id        | GeneTitle                                                                                                       | GeneSymbol    | t                |
|--------------------|-----------------------------------------------------------------------------------------------------------------|---------------|------------------|
| 210164_at          | granzyme B (granzyme 2, cytotoxic T-lymphocyte-associated serine esterase 1)                                    | GZMB          | 21.620876        |
| <b>209969_s_at</b> | <b>signal transducer and activator of transcription 1, 91kDa</b>                                                | <b>STAT1</b>  | <b>19.349693</b> |
| 202269_x_at        | guanylate binding protein 1, interferon-inducible, 67kDa                                                        | GBP1          | 13.790309        |
| 209417_s_at        | interferon-induced protein 35                                                                                   | IFI35         | 13.758327        |
| 202659_at          | proteasome (prosome, macropain) subunit, beta type, 10                                                          | PSMB10        | 9.567776         |
| 204415_at          | interferon, alpha-inducible protein 6                                                                           | IFI6          | 9.376857         |
| 202307_s_at        | transporter 1, ATP-binding cassette, sub-family B (MDR/TAP)                                                     | TAP1          | 9.037264         |
| 204279_at          | proteasome (prosome, macropain) subunit, beta type, 9 (large multifunctional peptidase 2)                       | PSMB9         | 8.909184         |
| <b>203882_at</b>   | <b>interferon regulatory factor 9</b>                                                                           | <b>IRF9</b>   | <b>8.694727</b>  |
| 34210_at           | CD52 molecule                                                                                                   | CD52          | 8.48951          |
| 209670_at          | T cell receptor alpha constant                                                                                  | TRAC          | 8.145286         |
| 203729_at          | epithelial membrane protein 3                                                                                   | EMP3          | 8.119499         |
| 210140_at          | cystatin F (leukocystatin)                                                                                      | CST7          | 7.86001          |
| 209732_at          | C-type lectin domain family 2, member B                                                                         | CLEC2B        | 7.856387         |
| 209813_x_at        | T cell receptor gamma constant 2 /// T cell receptor gamma variable 9 /// TCR gamma alternate reading           | TARP /// TRGC | 7.525085         |
| 214669_x_at        | immunoglobulin kappa locus                                                                                      | IGK@          | 7.403741         |
| 202270_at          | guanylate binding protein 1, interferon-inducible, 67kDa                                                        | GBP1          | 7.219952         |
| 204747_at          | interferon-induced protein with tetratricopeptide repeats 3                                                     | IFIT3         | 7.204917         |
| 204661_at          | CD52 molecule                                                                                                   | CD52          | 6.915314         |
| 218400_at          | 2'-5'-oligoadenylate synthetase 3, 100kDa                                                                       | OAS3          | 6.903254         |
| 201762_s_at        | proteasome (prosome, macropain) activator subunit 2 (PA28 beta)                                                 | PSME2         | 6.886636         |
| 200760_s_at        | ADP-ribosylation-like factor 6 interacting protein 5                                                            | ARL6IP5       | 6.759636         |
| 208965_s_at        | interferon, gamma-2-inducible protein 16                                                                        | IFI16         | 6.528202         |
| 214617_at          | perforin 1 (pore forming protein)                                                                               | PRF1          | 6.359152         |
| 216920_s_at        | T cell receptor gamma constant 2 /// T cell receptor gamma variable 9 /// TCR gamma alternate reading           | TARP /// TRGC | 6.319274         |
| 201641_at          | bone marrow stromal cell antigen 2                                                                              | BST2          | 6.252856         |
| <b>205965_at</b>   | <b>basic leucine zipper transcription factor, ATF-like</b>                                                      | <b>BATF</b>   | <b>6.235932</b>  |
| 215806_x_at        | T cell receptor gamma constant 2 /// T cell receptor gamma variable 9 /// TCR gamma alternate reading           | TARP /// TRGC | 6.235085         |
| 210951_x_at        | RAB27A, member RAS oncogene family                                                                              | RAB27A        | 6.18875          |
| 213060_s_at        | chitinase 3-like 2                                                                                              | CHI3L2        | 6.050052         |
| 213915_at          | natural killer cell group 7 sequence                                                                            | NGK7          | 6.044779         |
| 209514_s_at        | RAB27A, member RAS oncogene family                                                                              | RAB27A        | 5.824808         |
| 211796_s_at        | T cell receptor beta variable 19 /// T cell receptor beta variable 7-2 /// T cell receptor beta variable 5-4 /  | TRBC1 /// TR  | 5.664187         |
| 202592_at          | biogenesis of lysosome-related organelles complex-1, subunit 1                                                  | BLOC1S1       | 5.566296         |
| 202101_s_at        | v-ras simian leukemia viral oncogene homolog B (ras related; GTP binding protein)                               | RALB          | 5.519963         |
| 212203_x_at        | interferon induced transmembrane protein 3 (1-8U)                                                               | IFITM3        | 5.442233         |
| 201541_s_at        | zinc finger, HIT type 1                                                                                         | ZNHIT1        | 5.432486         |
| 208659_at          | chloride intracellular channel 1                                                                                | CLIC1         | 5.430092         |
| 214004_s_at        | vestigial like 4 (Drosophila)                                                                                   | VGLL4         | 5.380125         |
| 201601_x_at        | interferon induced transmembrane protein 1 (9-27)                                                               | IFITM1        | 5.374556         |
| 200814_at          | proteasome (prosome, macropain) activator subunit 1 (PA28 alpha)                                                | PSME1         | 5.367468         |
| 204994_at          | myxovirus (influenza virus) resistance 2 (mouse)                                                                | MX2           | 5.316415         |
| 205081_at          | cysteine-rich protein 1 (intestinal)                                                                            | CRIP1         | 5.314466         |
| 209890_at          | tetraspanin 5                                                                                                   | TSPAN5        | 5.276698         |
| 212784_at          | capicua homolog (Drosophila)                                                                                    | CIC           | 5.269762         |
| 209671_x_at        | T cell receptor alpha locus /// T cell receptor alpha constant                                                  | TRA@ /// TRA  | 5.267778         |
| 201194_at          | selenoprotein W, 1                                                                                              | SEPW1         | 5.245011         |
| 211144_x_at        | T cell receptor gamma constant 2 /// T cell receptor gamma variable 9 /// TCR gamma alternate reading           | TARP /// TRGC | 5.228222         |
| 220449_at          | hypothetical protein MGC5566                                                                                    | MGC5566       | 5.22753          |
| 217497_at          | endothelial cell growth factor 1 (platelet-derived)                                                             | ECGF1         | 5.20215          |
| 215797_at          | T cell receptor alpha variable 8-3                                                                              | TRAV8-3       | 5.201479         |
| 205345_at          | BRCA1 associated RING domain 1                                                                                  | BARD1         | 5.189021         |
| 217755_at          | hematological and neurological expressed 1                                                                      | HN1           | 5.102404         |
| 214343_s_at        | ataxin 7-like 1                                                                                                 | ATXN7L1       | 5.058278         |
| 208492_at          | regulatory factor X-associated protein                                                                          | RFXAP         | 5.01901          |
| 201275_at          | farnesyl diphosphate synthase (farnesyl pyrophosphate synthetase, dimethylallyltransferase, geranyl             | FDPS          | 4.992341         |
| 202760_s_at        | A kinase (PRKA) anchor protein 2 /// PALM2-AKAP2                                                                | AKAP2 /// PAL | 4.98906          |
| 216298_at          | hypothetical protein LOC648852                                                                                  | LOC648852     | 4.861568         |
| 206484_s_at        | X-prolyl aminopeptidase (aminopeptidase P) 2, membrane-bound                                                    | XPNPEP2       | 4.838981         |
| 202747_s_at        | integral membrane protein 2A                                                                                    | ITM2A         | 4.823814         |
| 206687_s_at        | protein tyrosine phosphatase, non-receptor type 6                                                               | PTPN6         | 4.78005          |
| 203595_s_at        | interferon-induced protein with tetratricopeptide repeats 5                                                     | IFIT5         | 4.732435         |
| 202446_s_at        | phospholipid scramblase 1                                                                                       | PLSCR1        | 4.699799         |
| 217962_at          | nucleolar protein family A, member 3 (H/ACA small nucleolar RNPs)                                               | NOLA3         | 4.657467         |
| 210972_x_at        | T cell receptor alpha locus /// T cell receptor delta variable 2 /// T cell receptor alpha variable 20 /// T ce | TRA@ /// TRA  | 4.647777         |
| 214995_s_at        | apolipoprotein B mRNA editing enzyme, catalytic polypeptide-like 3G /// apolipoprotein B mRNA editing e         | APOBEC3F ///  | 4.629687         |
| 218913_s_at        | GEM interacting protein                                                                                         | GMIP          | 4.617402         |
| 219807_x_at        | RAB4B, member RAS oncogene family                                                                               | RAB4B         | 4.609035         |
| 210807_s_at        | solute carrier family 16, member 7 (monocarboxylic acid transporter 2)                                          | SLC16A7       | 4.535773         |
| 202323_s_at        | acyl-Coenzyme A binding domain containing 3                                                                     | ACBD3         | 4.462806         |
| 206150_at          | CD27 molecule                                                                                                   | CD27          | 4.462507         |
| 209389_x_at        | diazepam binding inhibitor (GABA receptor modulator, acyl-Coenzyme A binding protein)                           | DBI           | 4.45446          |



Supplementary Table 6: Genes common to Progressor and PD-1 signatures

|             |                                                             |       |          |
|-------------|-------------------------------------------------------------|-------|----------|
| 222369_at   | N-acetyltransferase 11                                      | NAT11 | 4.394234 |
| 206332_s_at | interferon, gamma-inducible protein 16                      | IFI16 | 4.375824 |
| 212082_s_at | myosin, light chain 6, alkali, smooth muscle and non-muscle | MYL6  | 4.21968  |

## Supplementary Methods

### ***Microarray data analysis***

Prior to analysis, microarray data were pre-processed and normalized using robust multi-chip averaging, as previously described<sup>1</sup>. Differentially expressed genes between classes were ranked using Smyth's variance-moderated t-test<sup>2</sup>.

### ***Gene Set Enrichment Analysis***

Traditional strategies for gene expression analysis have focused on identifying individual genes that exhibit differences between two states of interest. Although useful, they may fail to detect biological processes, such as transcriptional programs, that are distributed across an entire network of genes but are hard to distinguish at the level of individual genes. Enrichment Analysis provides a general statistical method to test for the enrichment of a set of related genes in an independent expression dataset.<sup>3,4</sup>

Enrichment analysis considers a priori defined gene sets comprised of biologically related genes (e.g. members of a metabolic pathway, genes at the same genomic locus, or, in this case, genes upregulated in HIV-specific CD8<sup>+</sup> T cells from progressors or genes upregulated by PD-1 ligation). Using such a priori defined gene sets one can ask whether that set of genes, as whole, tends to occur towards the top (or bottom) of the rank-ordered set of all genes differentially expressed between two cell types of interest (e.g. exhausted vs. memory T cell samples). Sets of genes that are highly related to one cell-type should be distributed at the top of the rank ordered list; gene sets that are not related would be expected to be randomly distributed throughout the list.

Enrichment analysis estimates the degree of enrichment and assesses significance with a *P* value obtained by permutation testing. Considering groups of related genes, enrichment analysis increases resolution and statistical power, and can detect subtle but consistent changes that are often missed by inspection alone. The methodology of the statistical test has been previously described and used in several recent studies<sup>1,5,6</sup>.

Gene set enrichment analysis on groups of samples was performed as previously described using the Zhang statistic as implemented in the program RenderCat<sup>7</sup>. To characterize further the gene expression signatures of CD8<sup>+</sup> T cells from controllers and progressors, we tested for enrichment of differentially expressed genes in sets of functionally related genes. We used the Applied Biosystems Panther collection (<http://www.pantherdb.org>). Gene sets with less than five genes were excluded. To test for enrichments, we used a threshold-free technique based on the Zhang C statistic, implemented in the program RenderCat<sup>7</sup>.

### ***Single Sample Enrichment Analysis***

A variant of GSEA, termed single sample GSEA was used to identify the relative enrichment of the PD-1 signature genes in individual samples of HIV-specific CD8<sup>+</sup> T cells, or of CD8<sup>+</sup> T cells analyzed in a previous study<sup>1</sup>.

The PD-1 signature was projected across expression profiling data from 42 tetramer-sorted HIV-specific CD8<sup>+</sup> T cell samples and from a further 24 samples of CMV-, EBV- or influenza-specific CD8<sup>+</sup> T cells generated in our previous study<sup>3</sup>. This was accomplished by a 'single sample' extension of GSEA that allows one to define an enrichment score that represents the degree of absolute enrichment of a gene set in each sample within a given data set<sup>8</sup>. The gene expression values for a given sample were rank-normalized, and an enrichment score was produced using the Empirical Cumulative Distribution Functions (ECDF) of the genes in the signature and the remaining genes. This procedure is similar to that used in a previous implementation of GSEA<sup>4</sup> but the list is ranked by absolute expression (in one sample). The enrichment score is obtained by an integration of the difference between the ECDF. The enrichment score is obtained, not by a weighted Kolmogorov-Smirnov statistic like in GSEA<sup>4</sup>, but by an integration of the difference between the ECDFs.

### ***Cell Culture***

PD-1 expressing Jurkat cells were generated by transduction with a lentivirus expressing full-length PD-1, and maintained in RPMI 1640 (MediaTech) supplemented with 10% Fetal Bovine Serum (Hyclone), 1% of both pen/strep and L-glutamine, 16.6 ug/ml gentamicin (Gibco/Invitrogen) and 10 ug/ml blasticidin (InvivoGen).

Primary human CD4<sup>+</sup> or CD8<sup>+</sup> T cells from the peripheral blood of healthy volunteers were isolated via magnetic selection using the respective isolation kits (Miltenyi Biotec), and in most cases were labeled with CFSE according to manufacturer's instructions (Molecular Probes/Invitrogen).

293FT cells used to generate lentivirus particles were maintained in DMEM (MediaTech) supplemented with 10% Fetal Bovine Serum (Hyclone), 1% of both pen/strep and L-glutamine and 16.6 µg/ml gentamicin (Gibco/Invitrogen).

### ***Bead preparation***

Beads used for cell stimulation were generated by conjugation of antibodies against CD3 (64 ng, clone UCHT1) and CD28 (80 ng, clone CD28.2) as well as either control IgG1 (1.25 µg clone MOPC-31C) for positive CD3/CD28 beads or either an antibody against human PD-1 (1.25 µg, clone EH12) or PDL1-Ig fusion protein<sup>9</sup> (1.25 µg) for PD1/CD3/CD28 or PDL1/CD3/CD28 beads, respectively, to CELLection Pan Mouse IgG beads (Invitrogen/Dynal). For PDL1-Ig titration experiments, the amount of PDL1-Ig conjugated to the beads was decreased in 2-fold increments while IgG1 was added to maintain equivalent amounts of total protein on the beads (1.394 µg total protein). Binding occurred over a 90 minute incubation period at 4 °C with constant end-over-end rotation. Following incubation, beads were washed twice and stored at 4 °C in the 0.1% FBS-containing PBS prior to use.

### ***RNA Isolation and cDNA conversion***

RNA was isolated from cells resuspended in TRIzol and cDNA was generated from a reverse transcription reaction using the ImProm-II Reverse Transcription System (Promega) or, for samples with fewer than 50,000 cells, with the WT-Ovation Pico RNA Amplification system (NuGEN) according to the manufacturer's directions.

### ***Lentiviral vectors and transduction***

Lentiviral vectors encoding shRNA hairpin sequences targeting BATF or GFP as control as well as a puromycin resistance cassette in the pLKO.1 backbone were obtained from The RNAi Consortium (TRC, <http://broadinstitute.org/rnai/trc>) of the Broad Institute (Cambridge, MA). The lentiviral vector used to overexpress BATF was generated by gateway cloning of full-length human BATF cDNA (Open Biosystems) into the pLenti6.2/V5-DEST vector that includes a blasticidin resistance cassette (Invitrogen). Lentivirus-containing supernatant was generated according to TRC protocols (<http://www.broadinstitute.org/rnai/trc/lib>) via a lipid-based delivery system using TransIT-LT1 transfection reagent (Mirus Bio) and 293FT cells provided by the TRC.

For lentiviral transduction of primary human T cells, following isolation and CFSE labeling, cells were placed at a concentration of  $2 \times 10^6$  cells well<sup>-1</sup> in 24 well plates previously coated with 2.5 µg/ml of antibodies against CD3 (OKT3 clone, eBiosciences, San Diego, CA) and CD28 (CD28.2 clone, BD Biosciences) antibodies in media comprised of RPMI 1640 supplemented with 10% FBS, 1% of pen/strep, L-glutamine and HEPES and 16.6 µg/ml gentamicin (Gibco/Invitrogen), in the presence of 20 U ml<sup>-1</sup> recombinant human IL-2 (Roche Diagnostics). Following 2 days of stimulation, cells were counted and placed in wells of a 96 well U-bottom plate at a concentration of  $2 \times 10^5$  cells well<sup>-1</sup> in media supplemented with 8 µg/ml of polybrene (Sigma, St. Louis, MO) and 20 U ml<sup>-1</sup> rhIL-2 together with lentivirus-containing supernatant at an MOI of 1. Transduction occurred via a 90 min spin infection at 2250 rpm at 37 °C, after which the lentivirus-containing supernatant was removed and replaced with fresh media supplemented with 20 U ml<sup>-1</sup> rhIL-2. At day 2 following transduction, media containing selection reagents, (puromycin for shRNA vectors and blasticidin for overexpression vectors), as well as IL-2 was added and selection was allowed to occur for a total of 5 days. All subsequent experiments with lentivirus-transduced T cells were conducted in the absence of IL-2.

### **Cytokine measurements**

IL-2 and IFN- $\gamma$  production was measured using Quantikine Immunoassays according to manufacturer's direction (R&D Systems). For HIV-specific experiments, cytokines were measured with the Milliplex High sensitivity Kit (Millipore) using the Bio-Plex 200 system (BioRad) according to the manufacturer's instructions

### **References**

1. Haining, W.N., *et al.* Identification of an evolutionarily conserved transcriptional signature of CD8 memory differentiation that is shared by T and B cells. *J. Immunol.* **181**, 1859-1868 (2008).
2. Smyth, G.K. Linear models and empirical bayes methods for assessing differential expression in microarray experiments. *Stat. Appl. Genet. Mol. Biol.* **3**, Article3 (2004).
3. Haining, W.N. & Wherry, E.J. Integrating genomic signatures for immunologic discovery. *Immunity* **32**, 152-161 (2010).
4. Subramanian, A., *et al.* Gene set enrichment analysis: a knowledge-based approach for interpreting genome-wide expression profiles. *Proc. Natl. Acad. Sci. U. S. A.* **102**, 15545-15550 (2005).
5. Sarkar, S., *et al.* Functional and genomic profiling of effector CD8 T cell subsets with distinct memory fates. *J. Exp. Med.* **205**, 625-640 (2008).
6. Wherry, E.J., E. J., *et al.* Molecular signature of CD8+ T cell exhaustion during chronic viral infection. *Immunity* **27**, 670-684 (2007).
7. Nilsson, B., Håkansson, P., Johansson, M., Nelander, S. & Fioretos, T. Threshold-free high-power methods for the ontological analysis of genome-wide gene-expression studies. *Genome Biol.* **8**, R74 (2007).
8. Barbie, D.A., *et al.* Systematic RNA interference reveals that oncogenic KRAS-driven cancers require TBK1. *Nature* **462**, 108-112 (2009).
9. Latchman, Y., *et al.* PD-L2 is a second ligand for PD-1 and inhibits T cell activation. *Nat. Immunol.* **2**, 261-268 (2001).
